# Supplementary material
Source: ML conference proceedings conference paper supplement (https://openreview.net/forum?id=hYjlAA6wXT)

Sample Index: 0

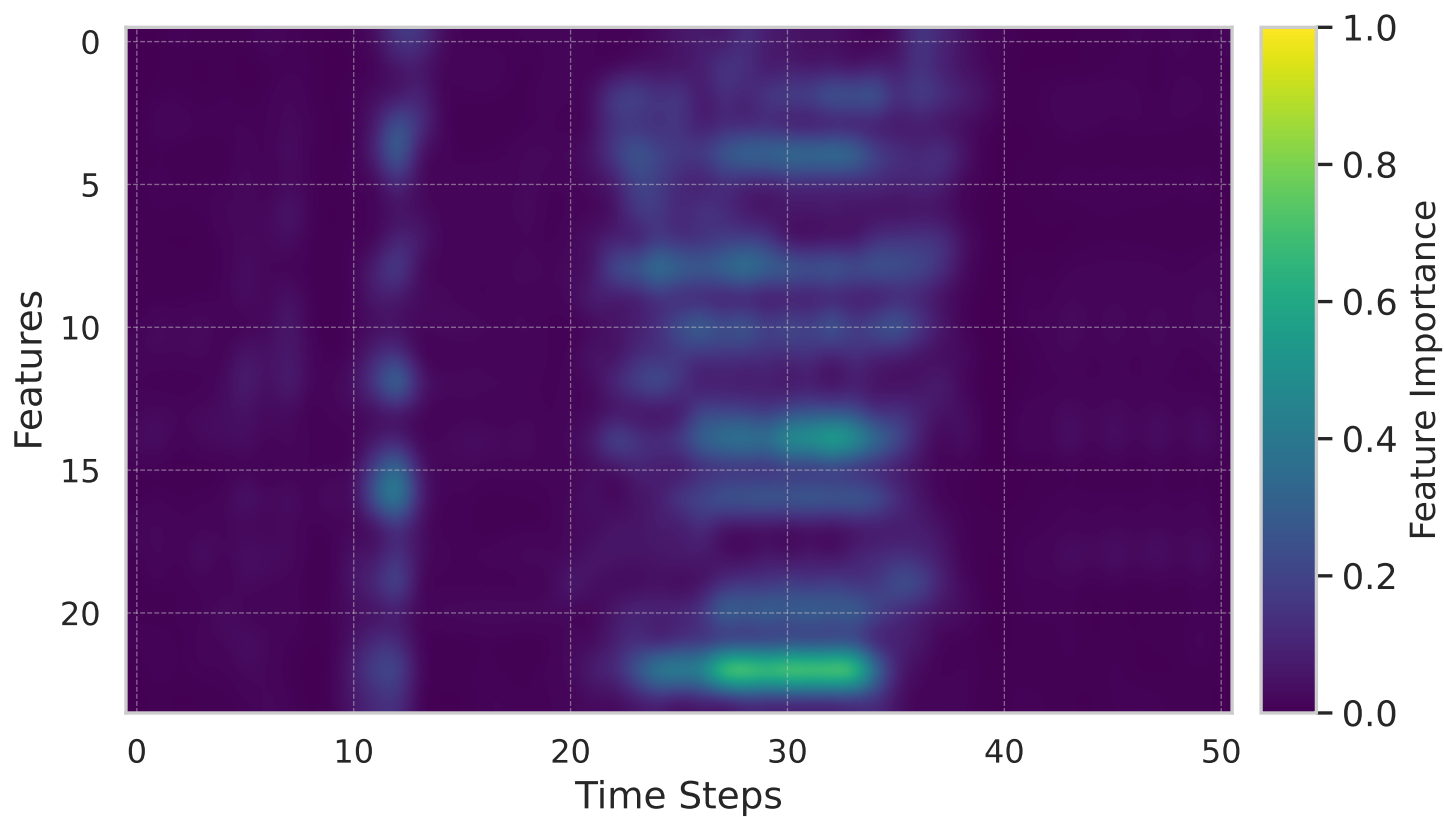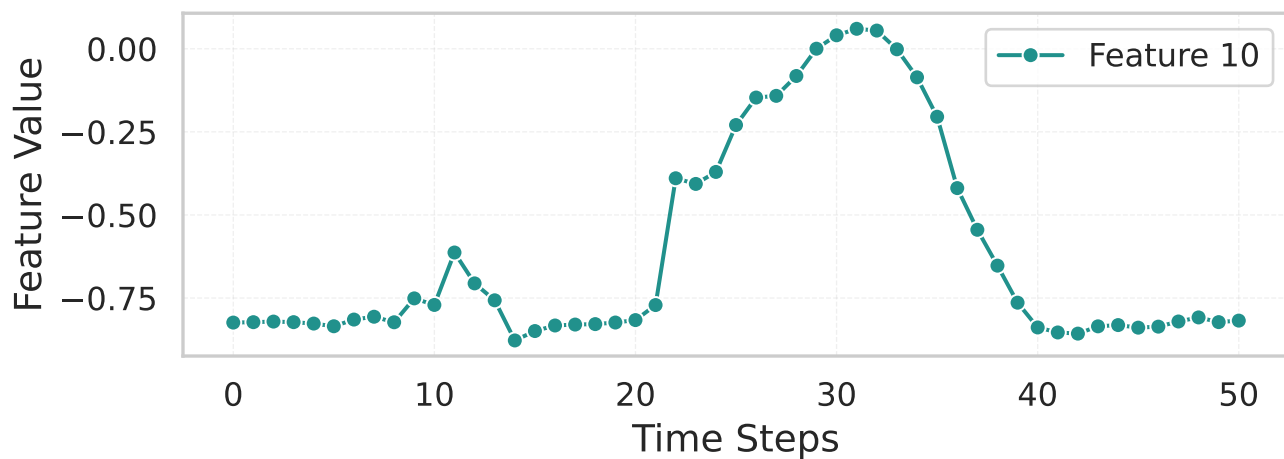

Sample Index: 1

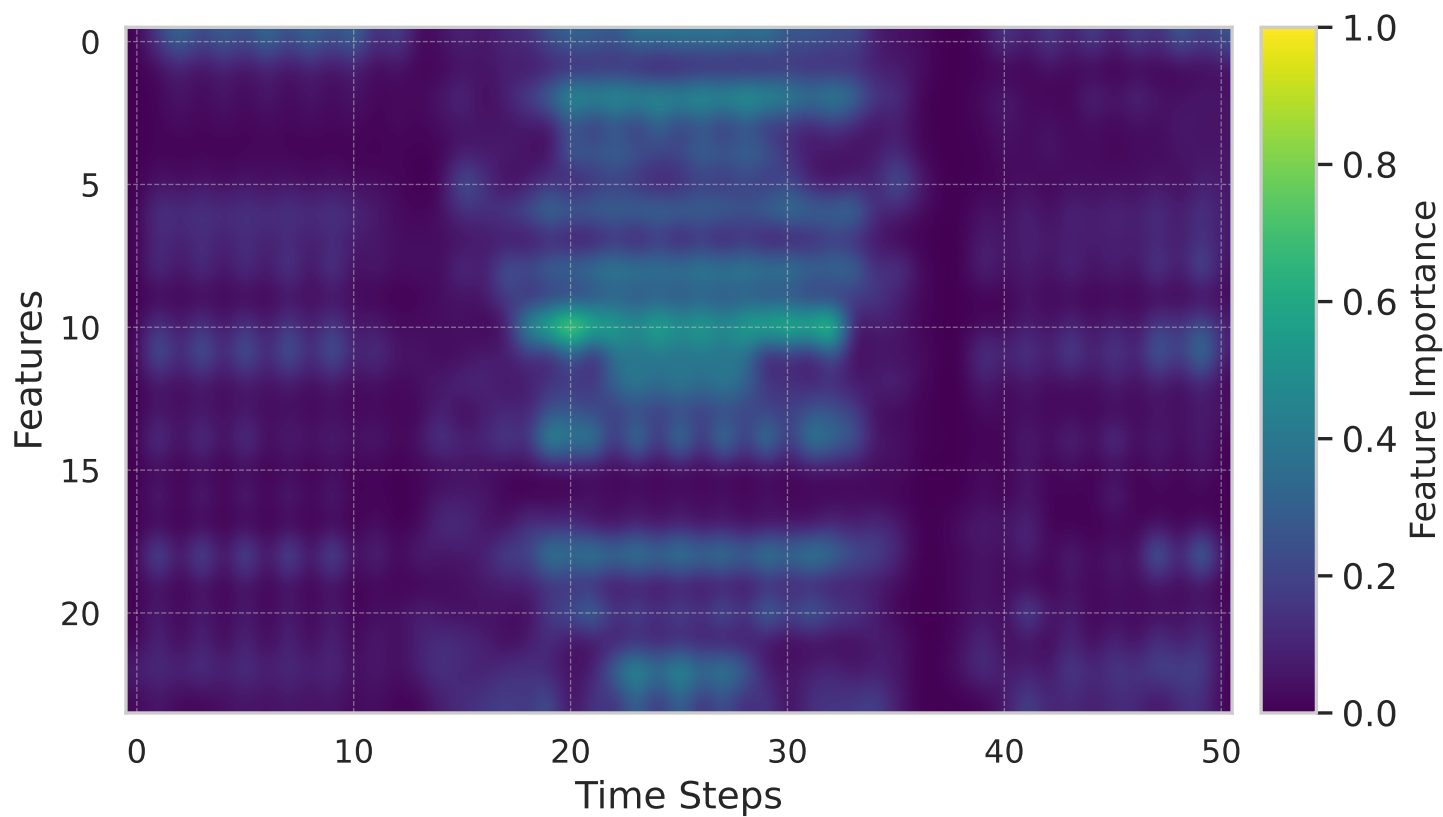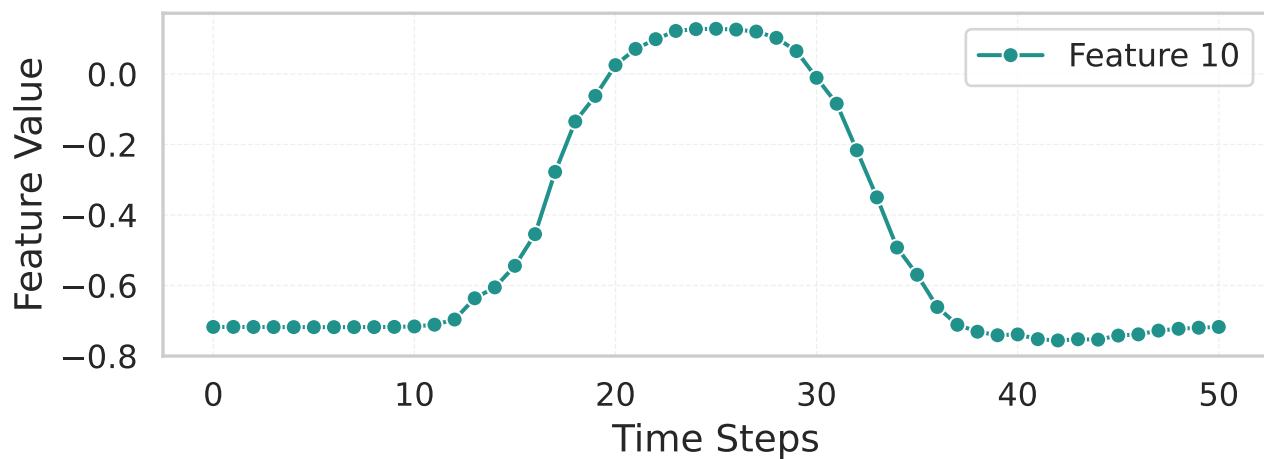

Sample Index: 2

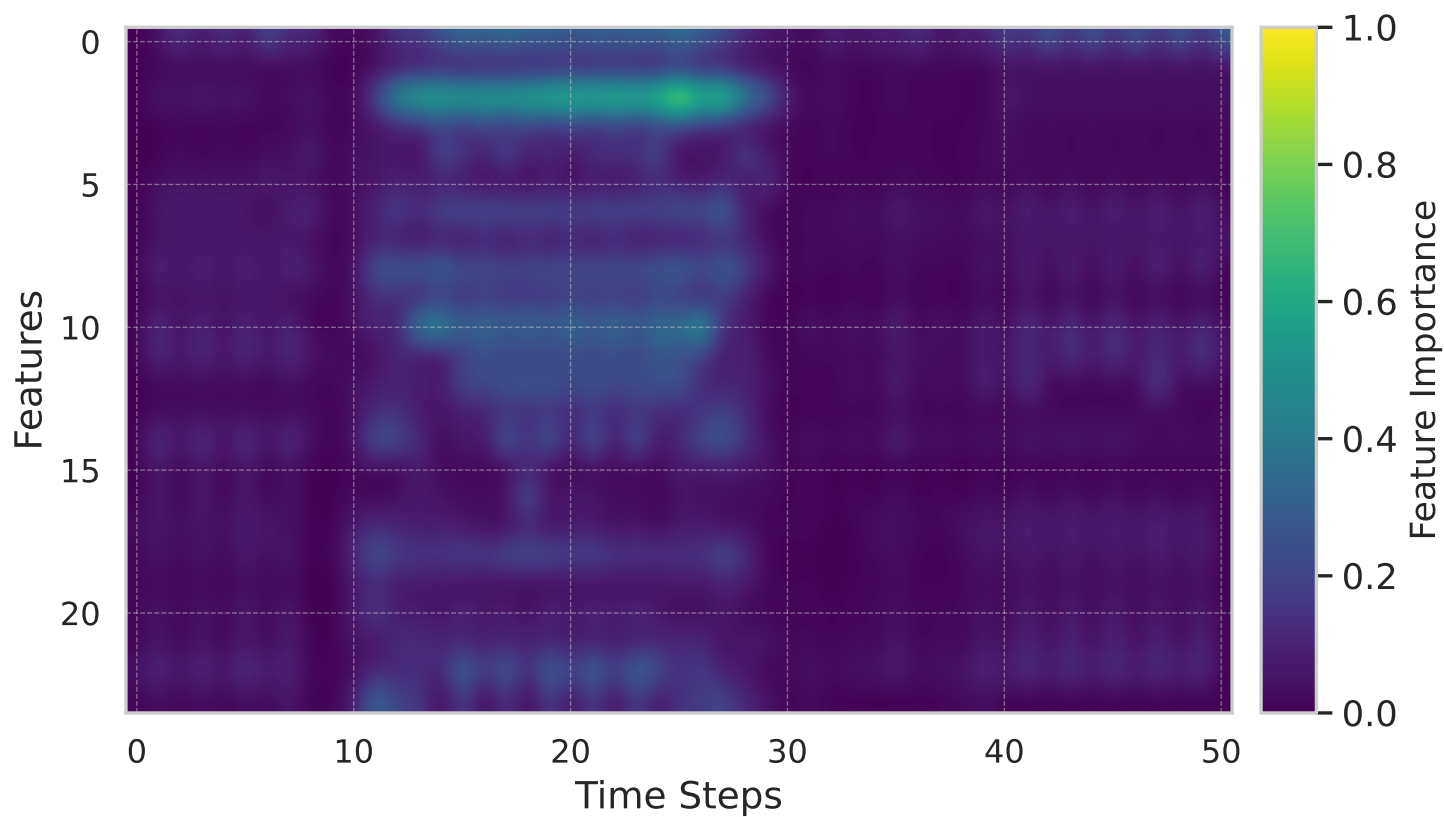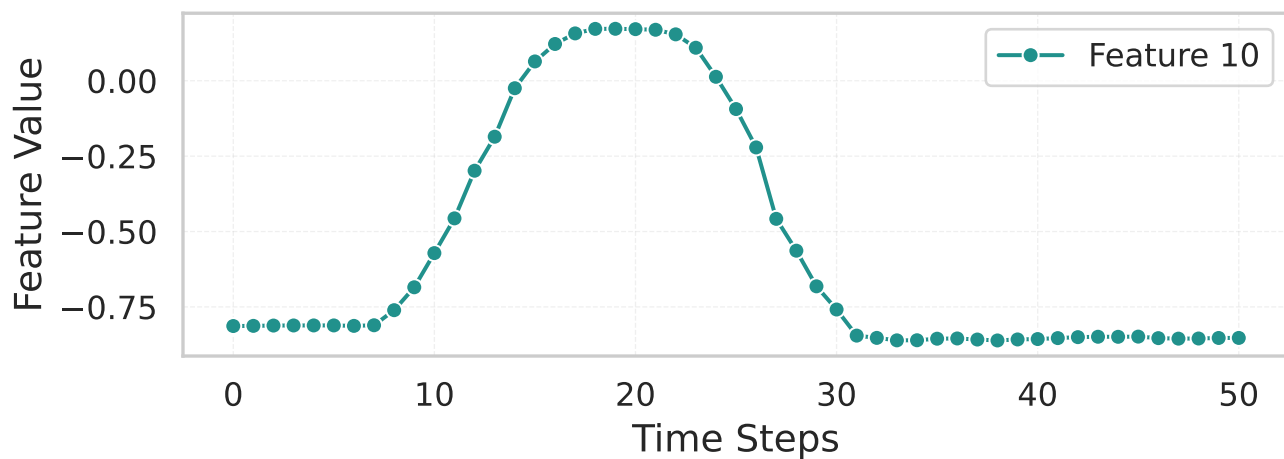

Sample Index: 3

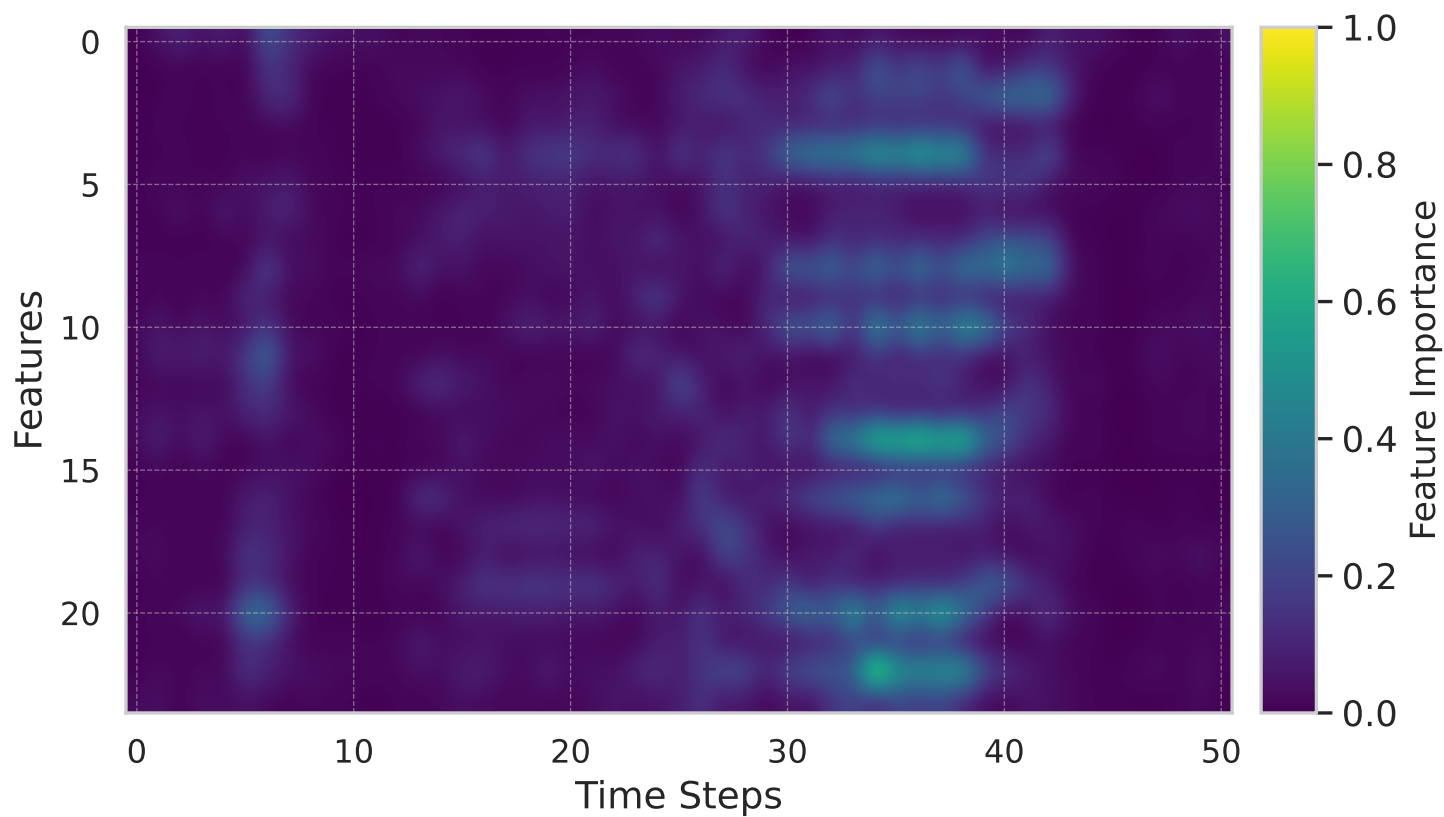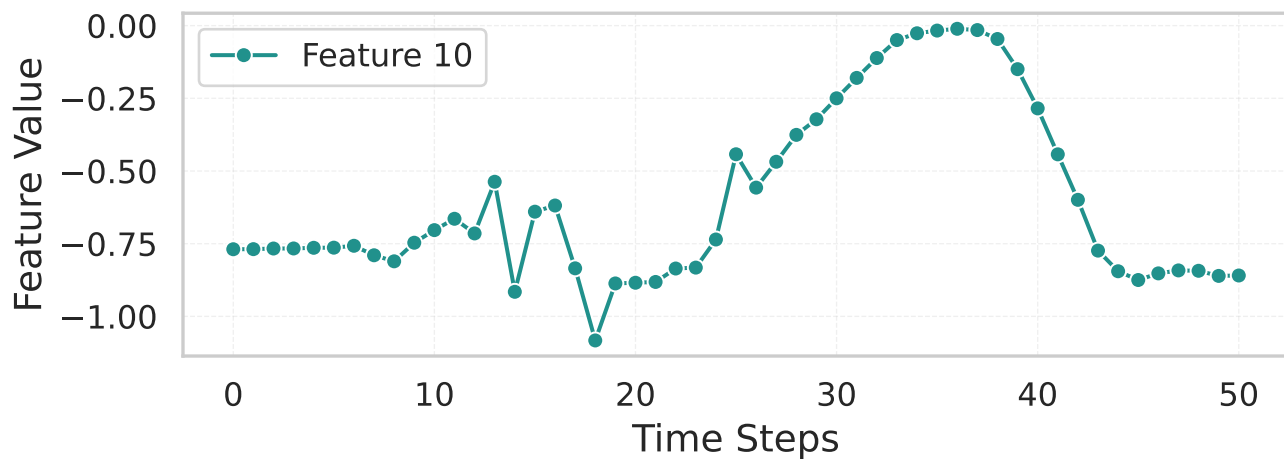



Sample Index: 4

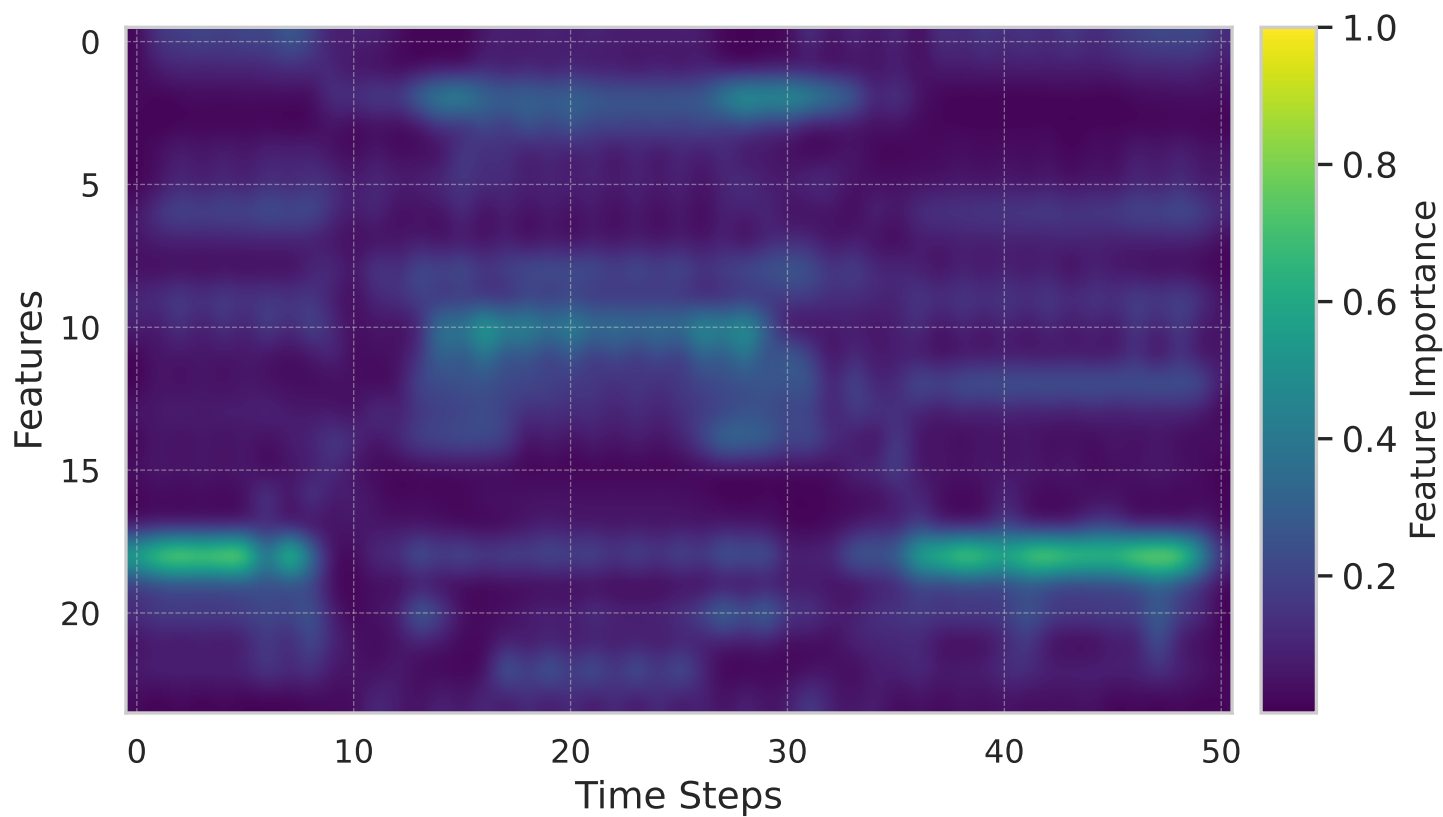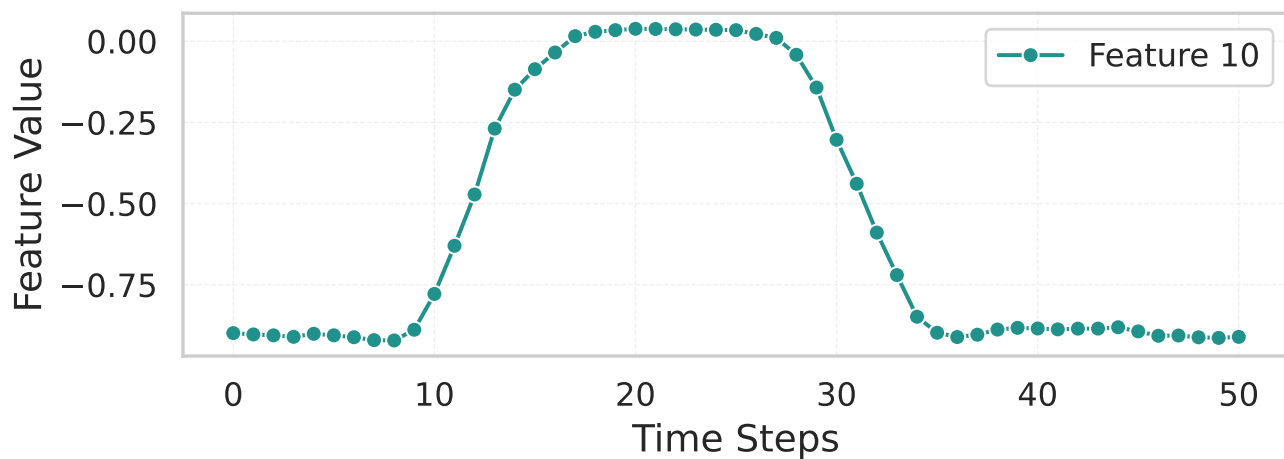

Sample Index: 5

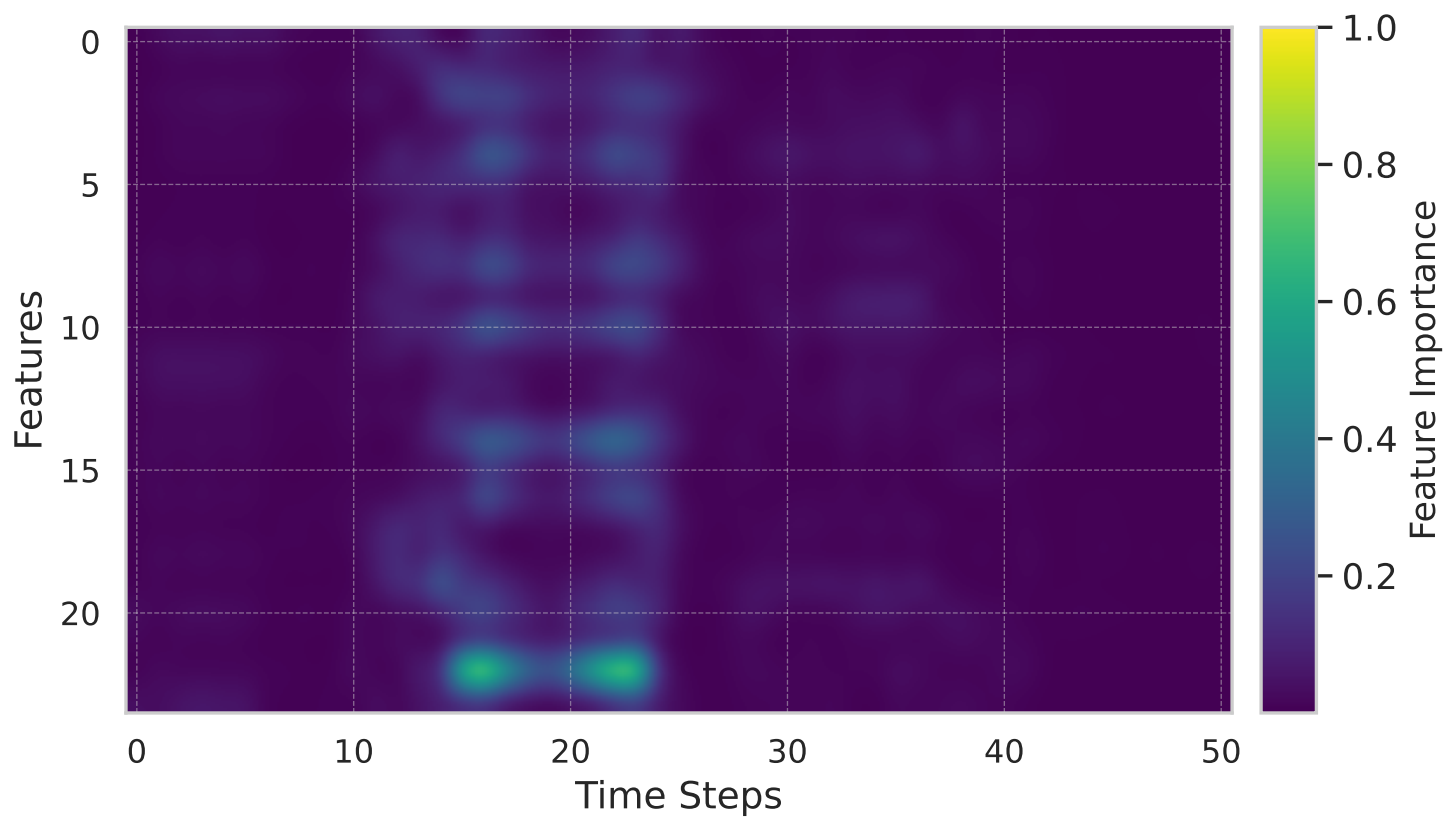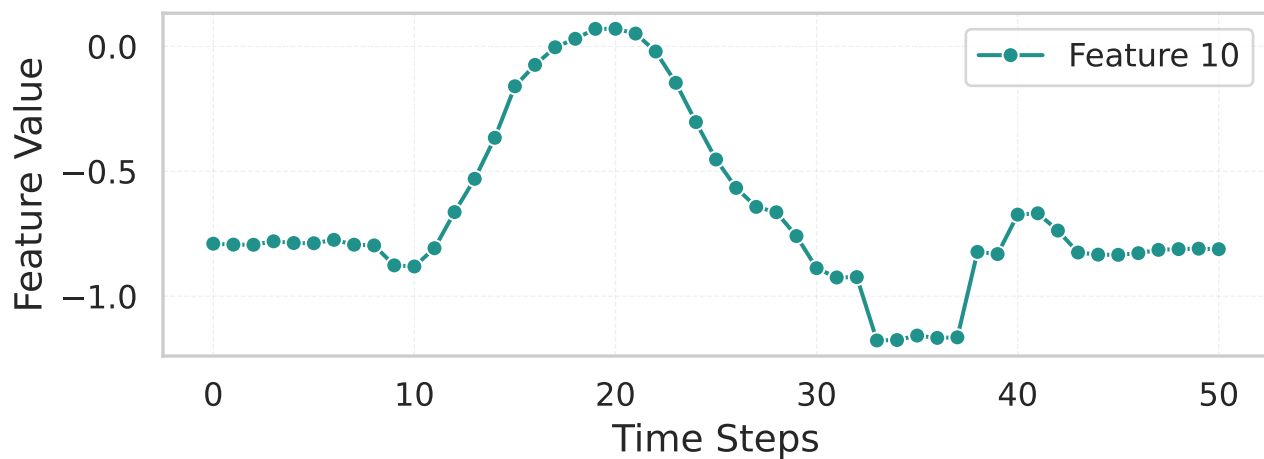

Sample Index: 6

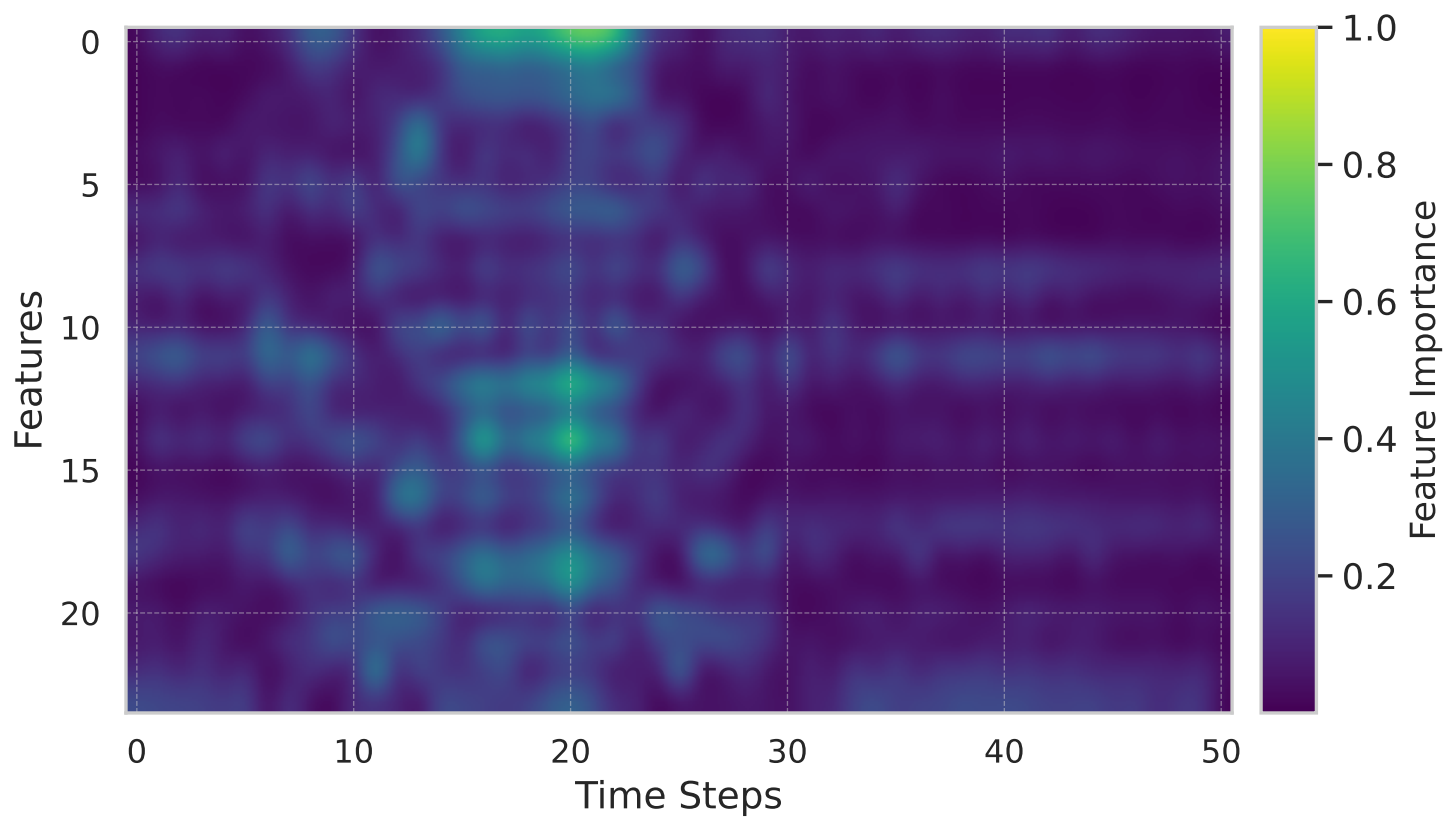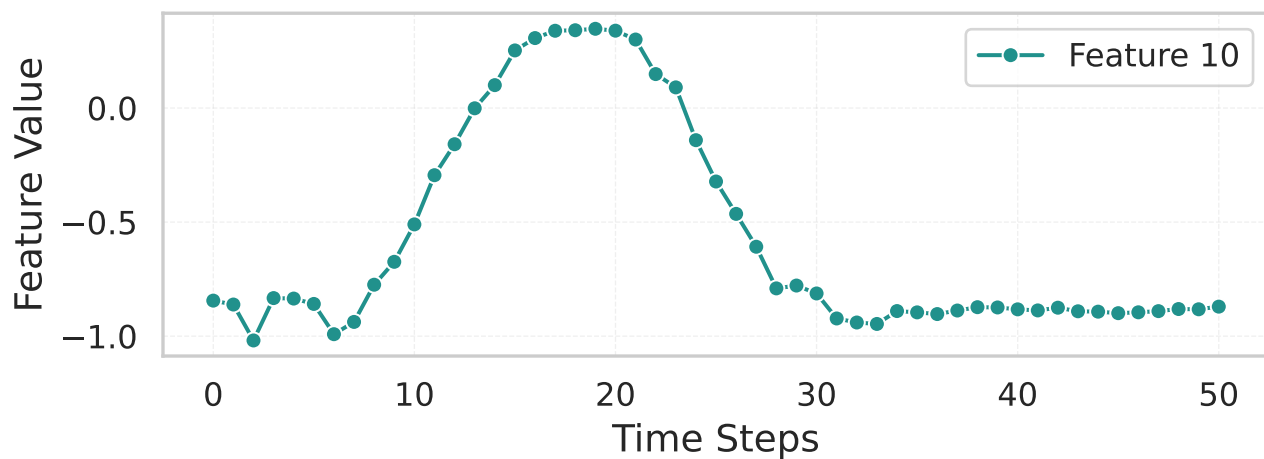

Sample Index: 7

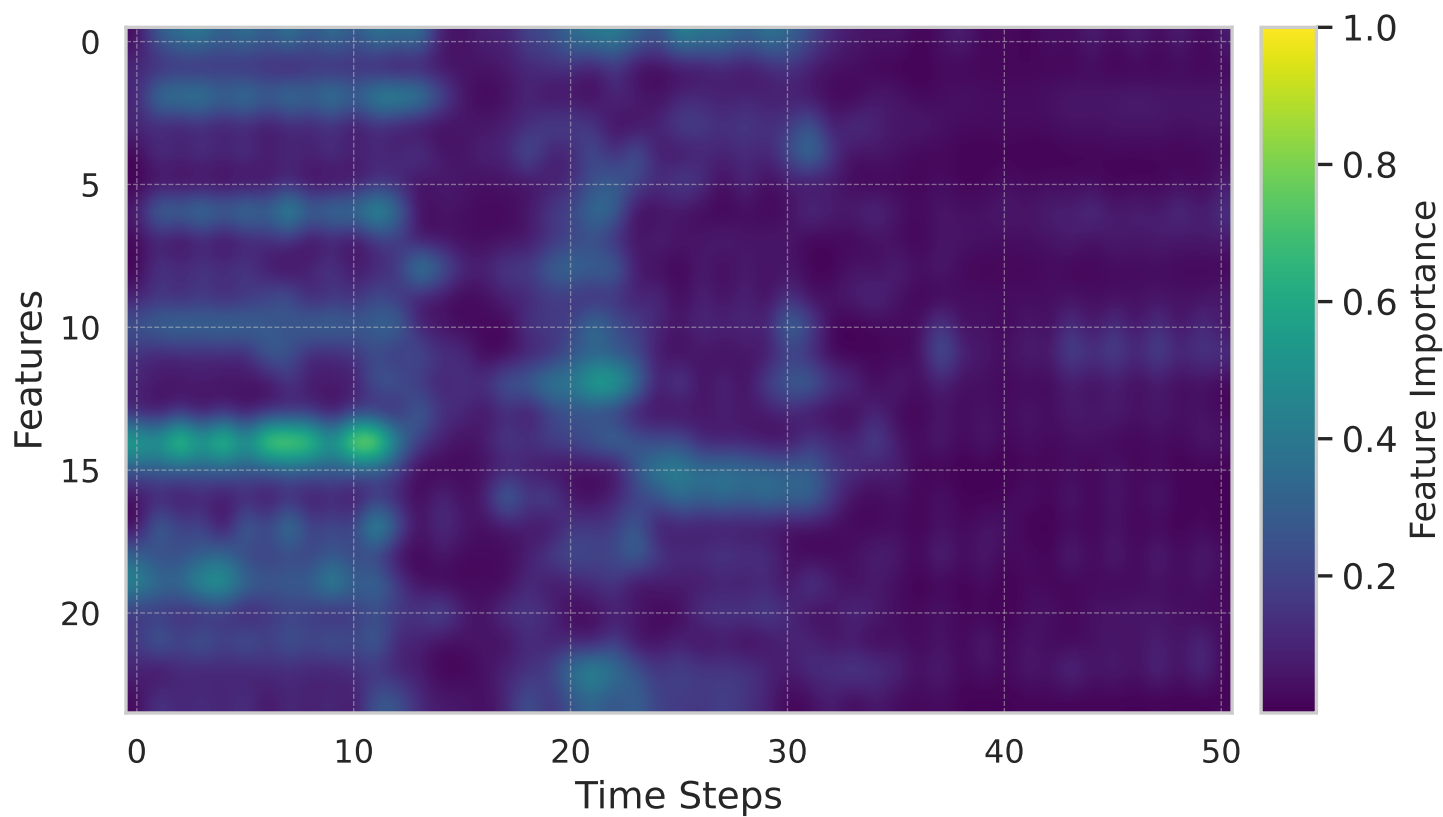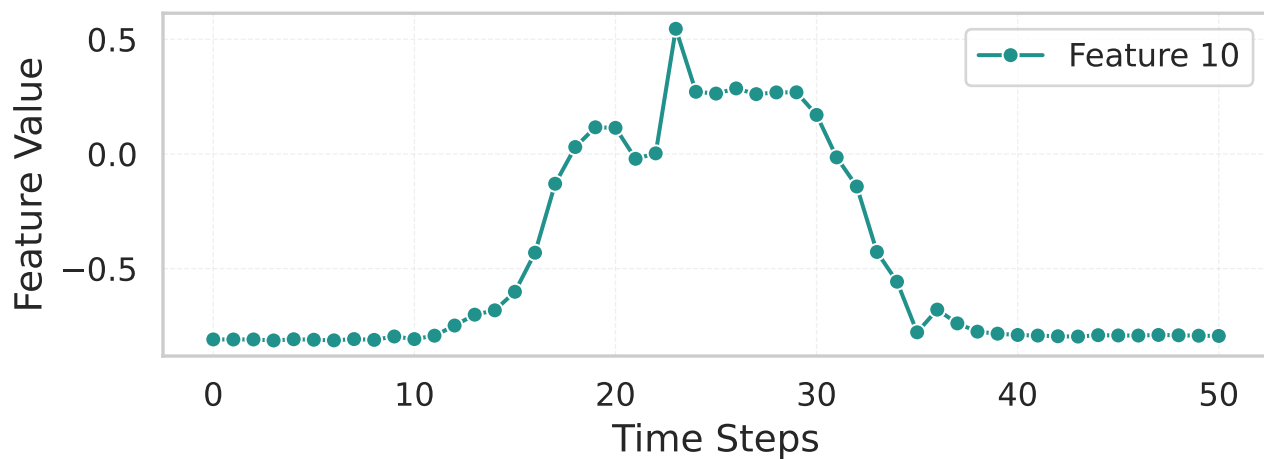

Sample Index: 8

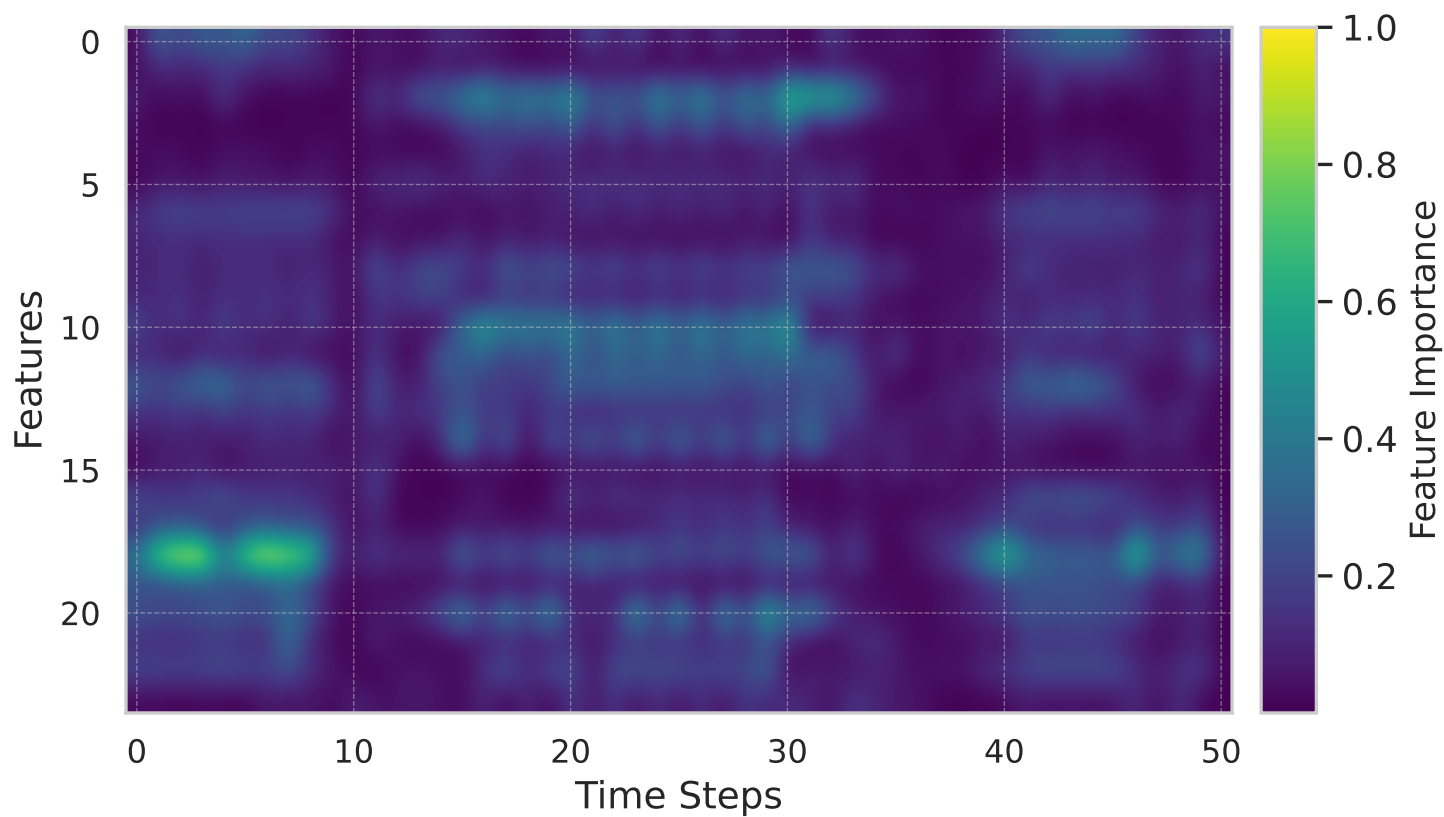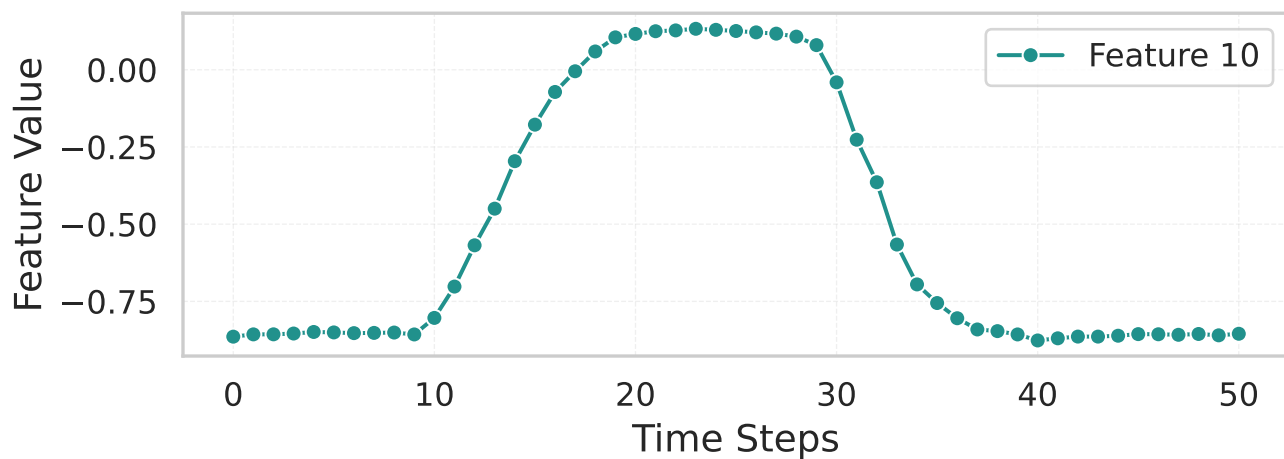

Sample Index: 9

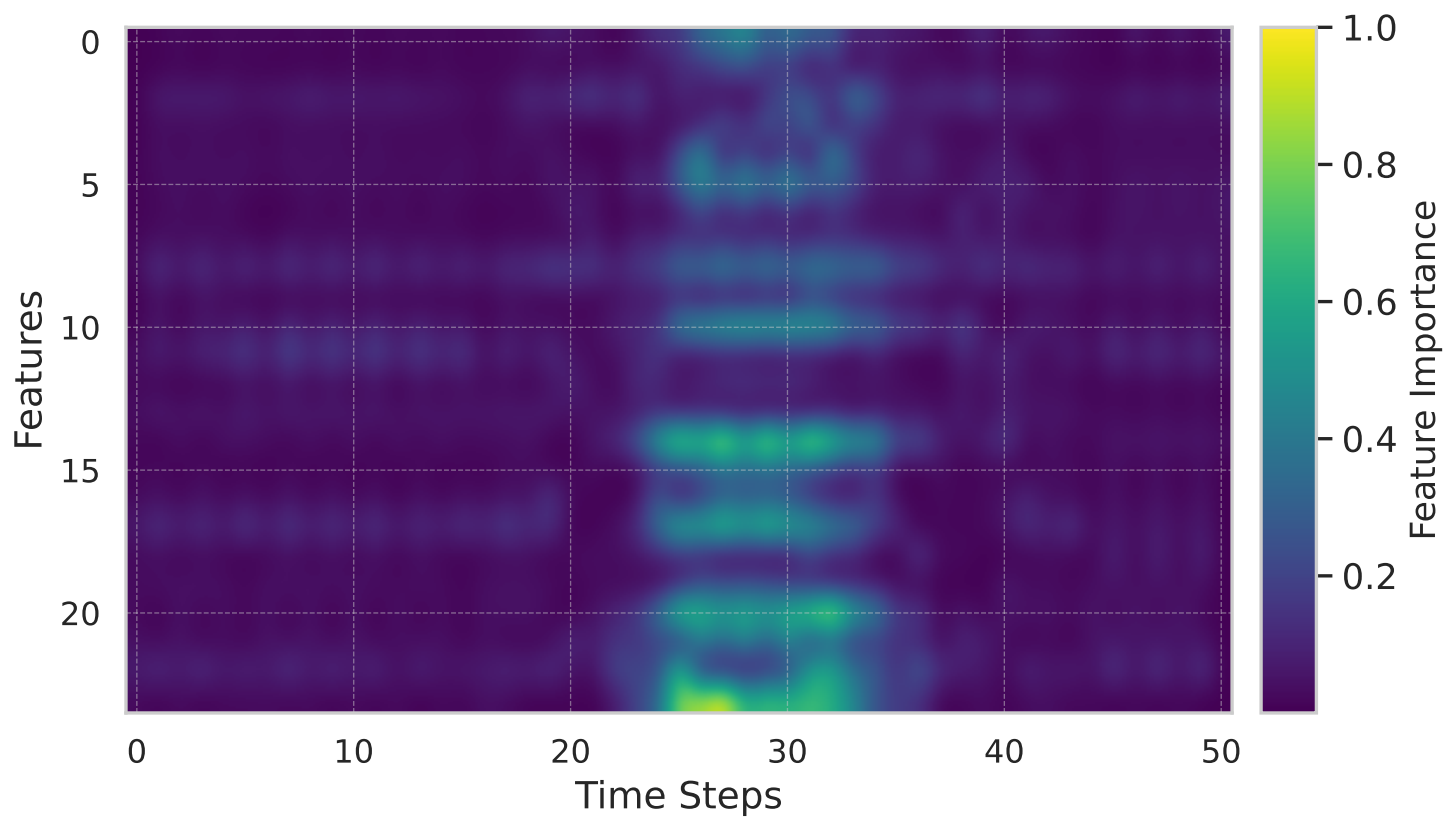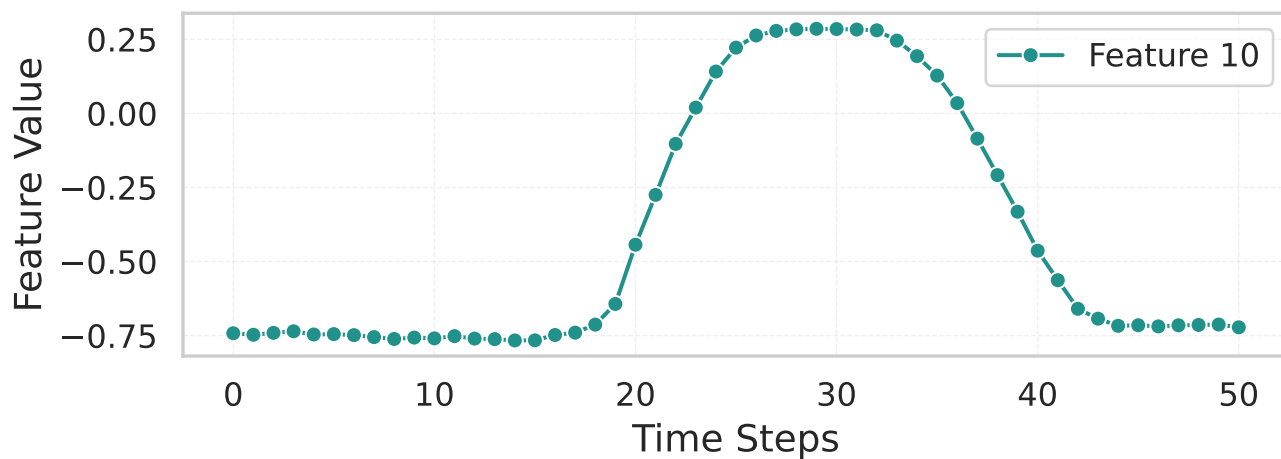

Sample Index: 10

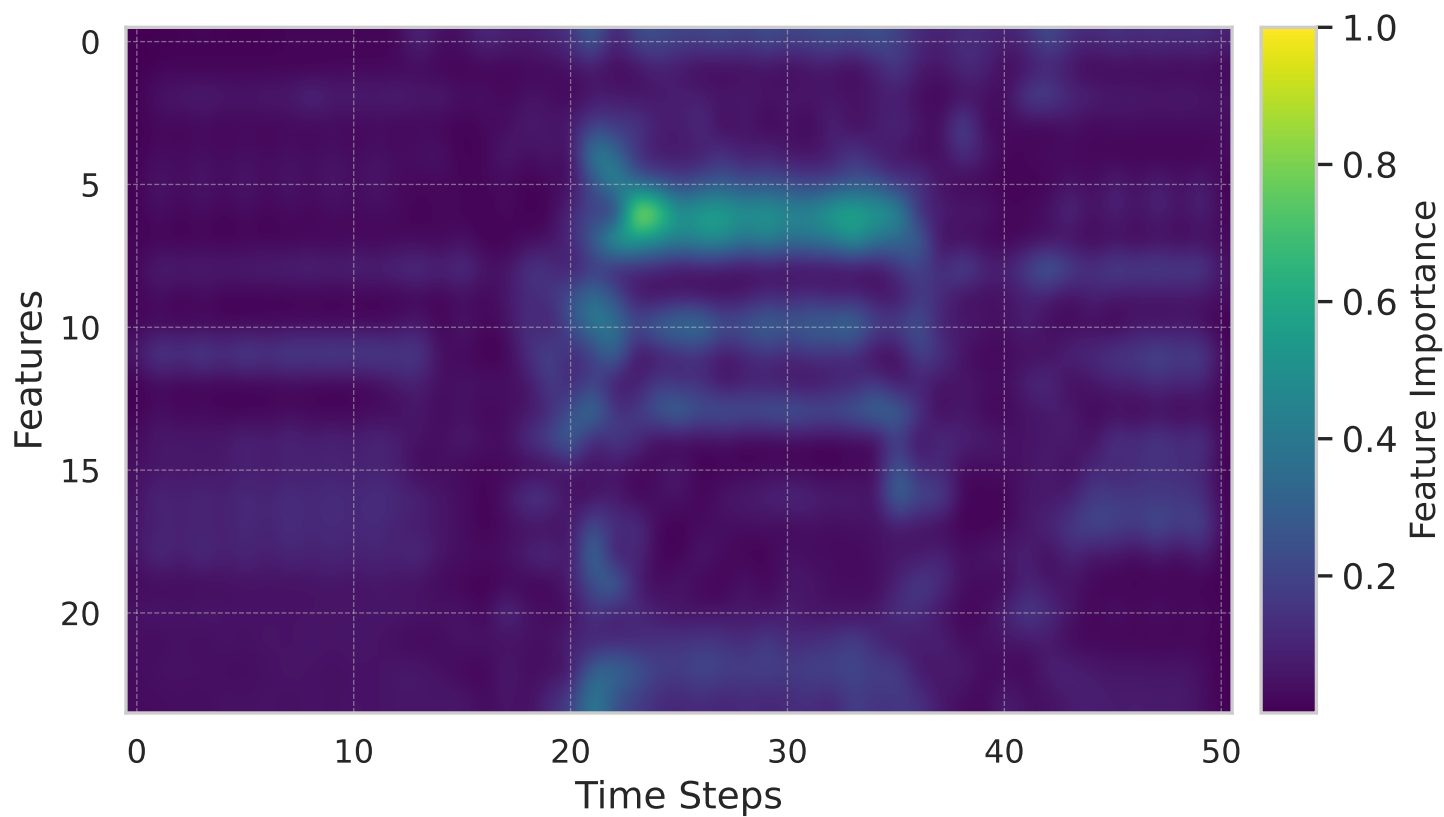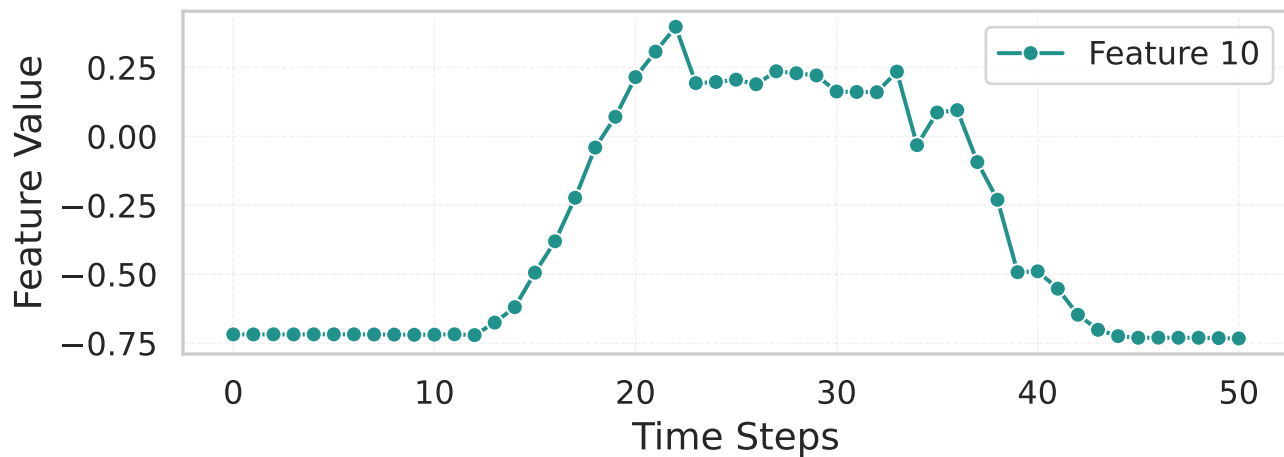

Sample Index: 11

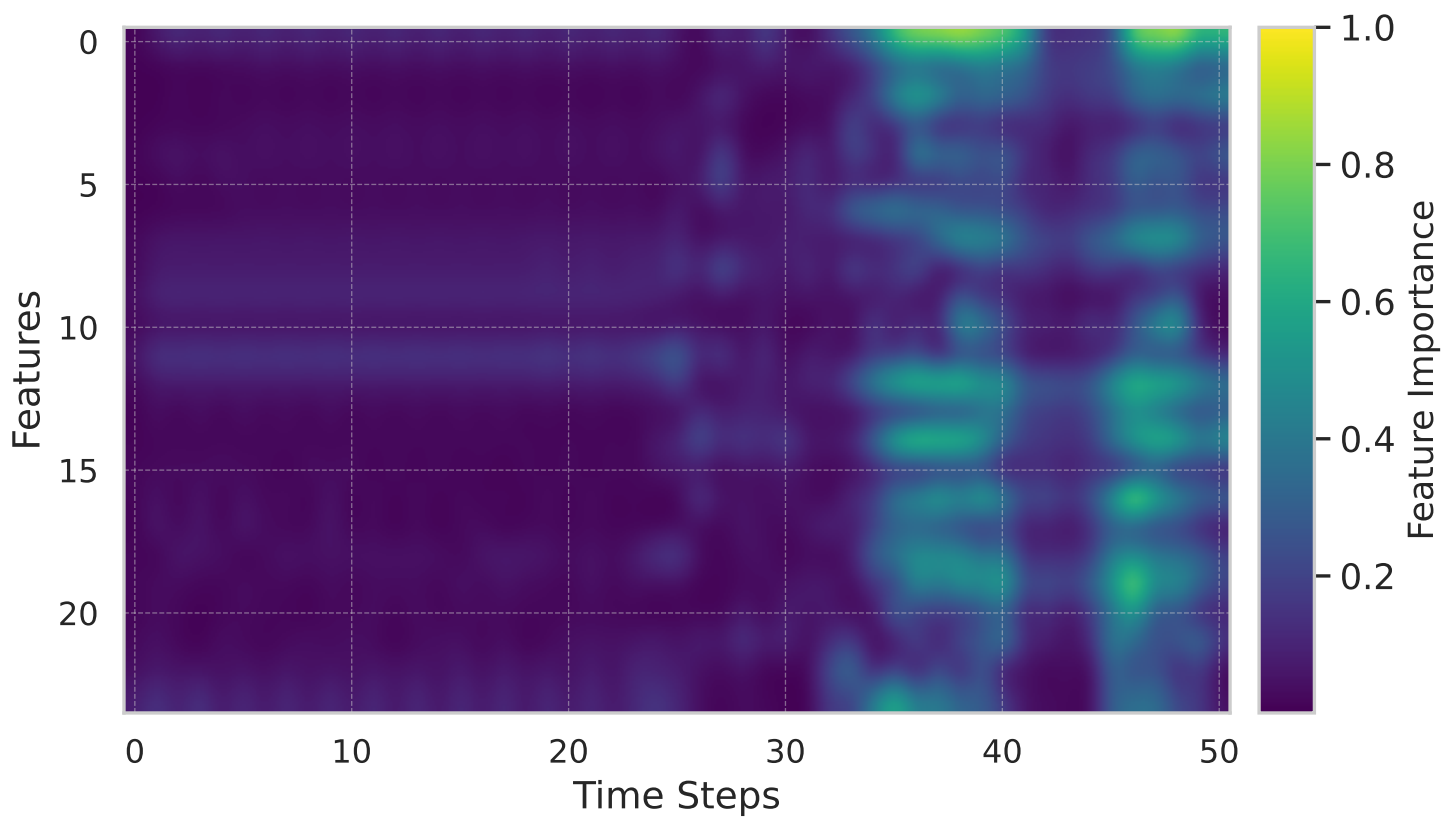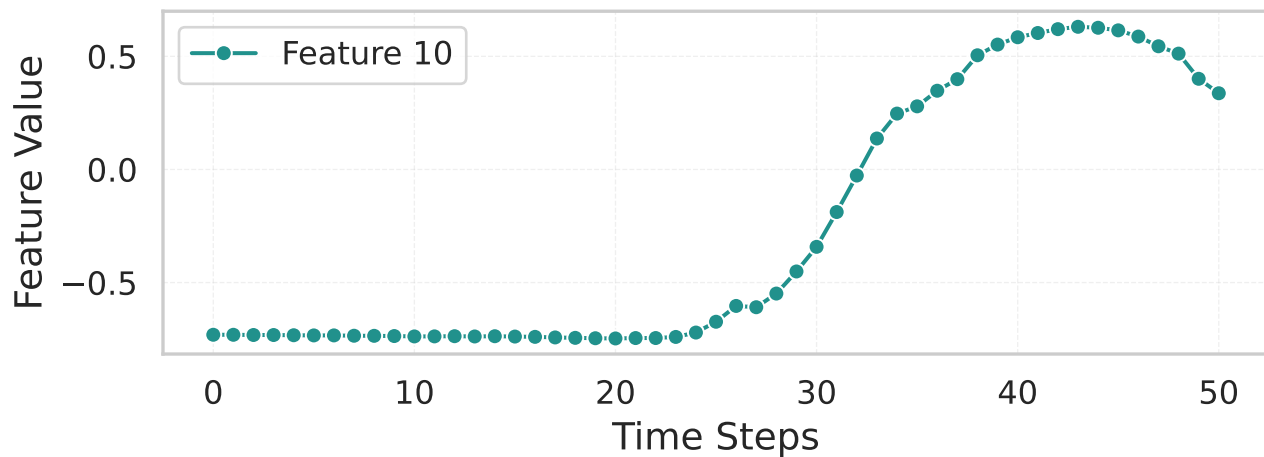



Sample Index: 12

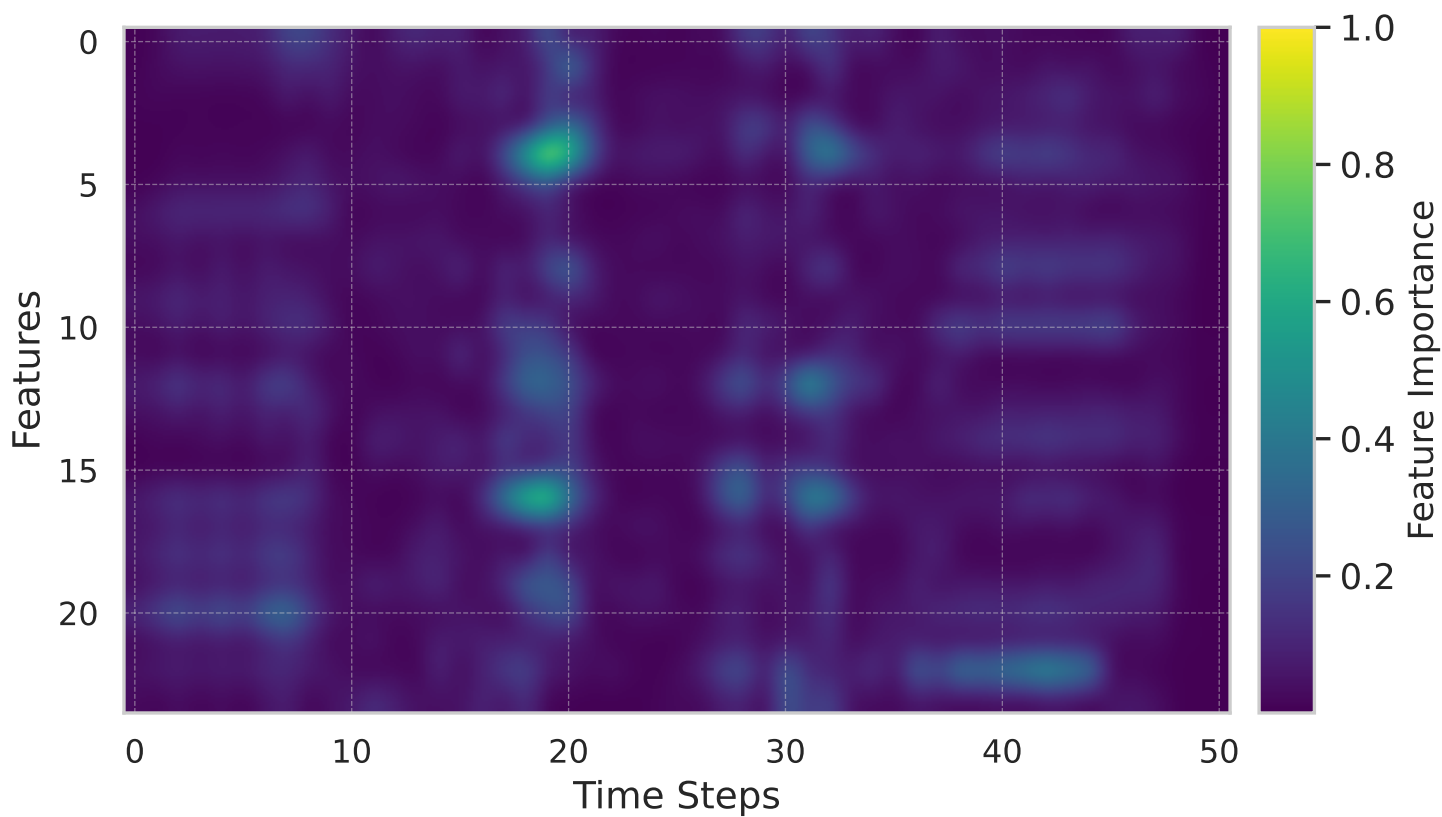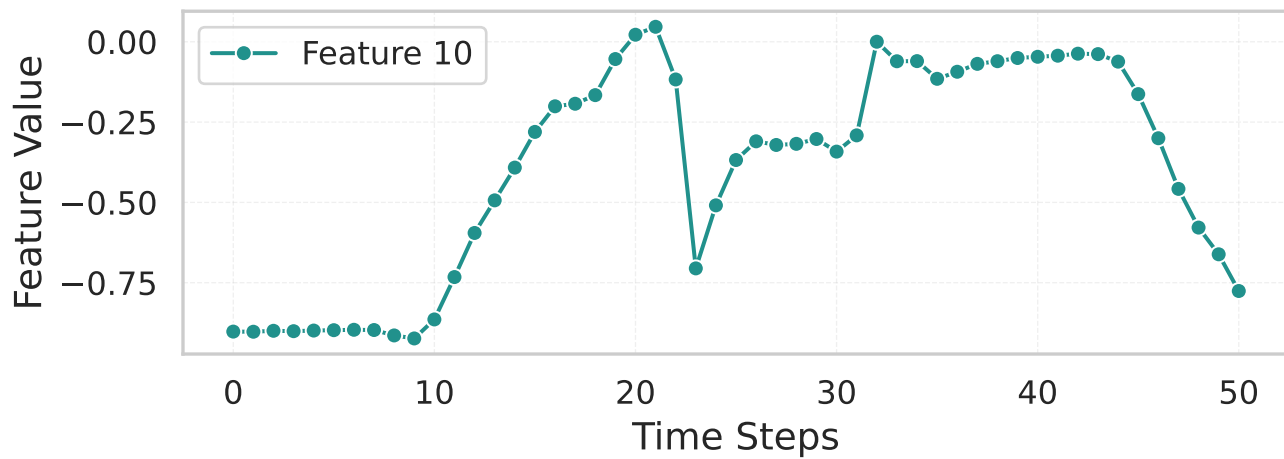

Sample Index: 13

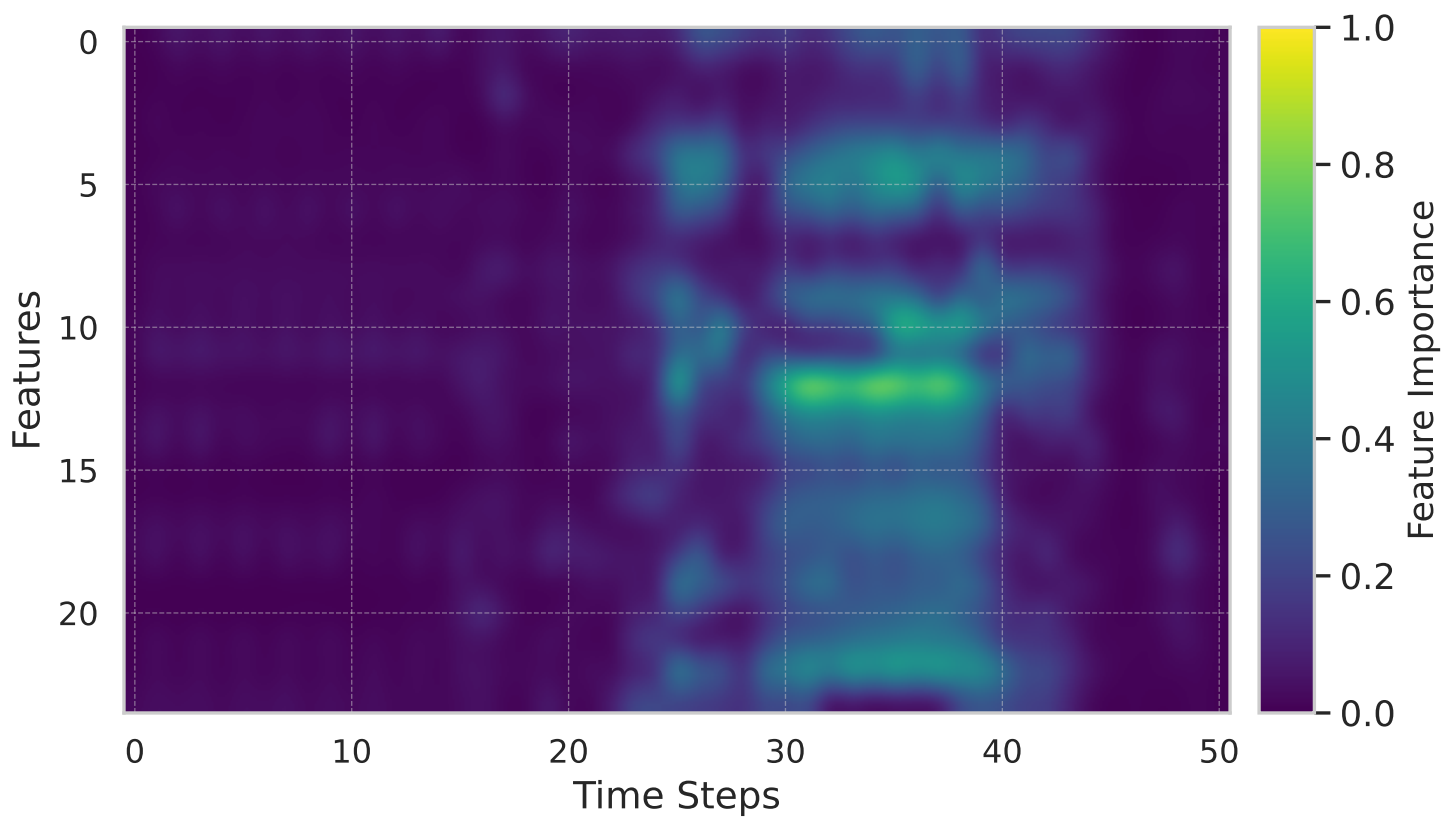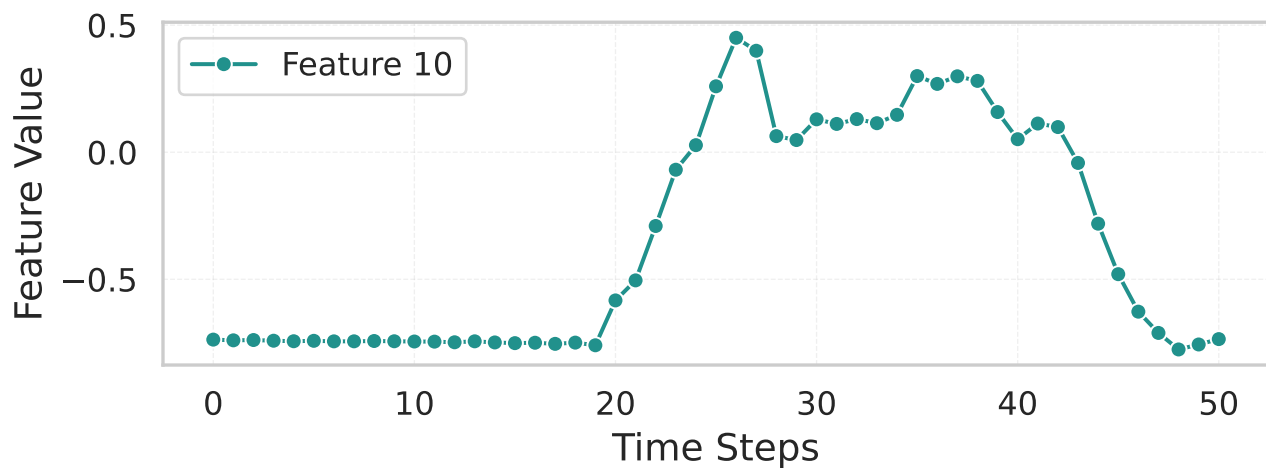

Sample Index: 14

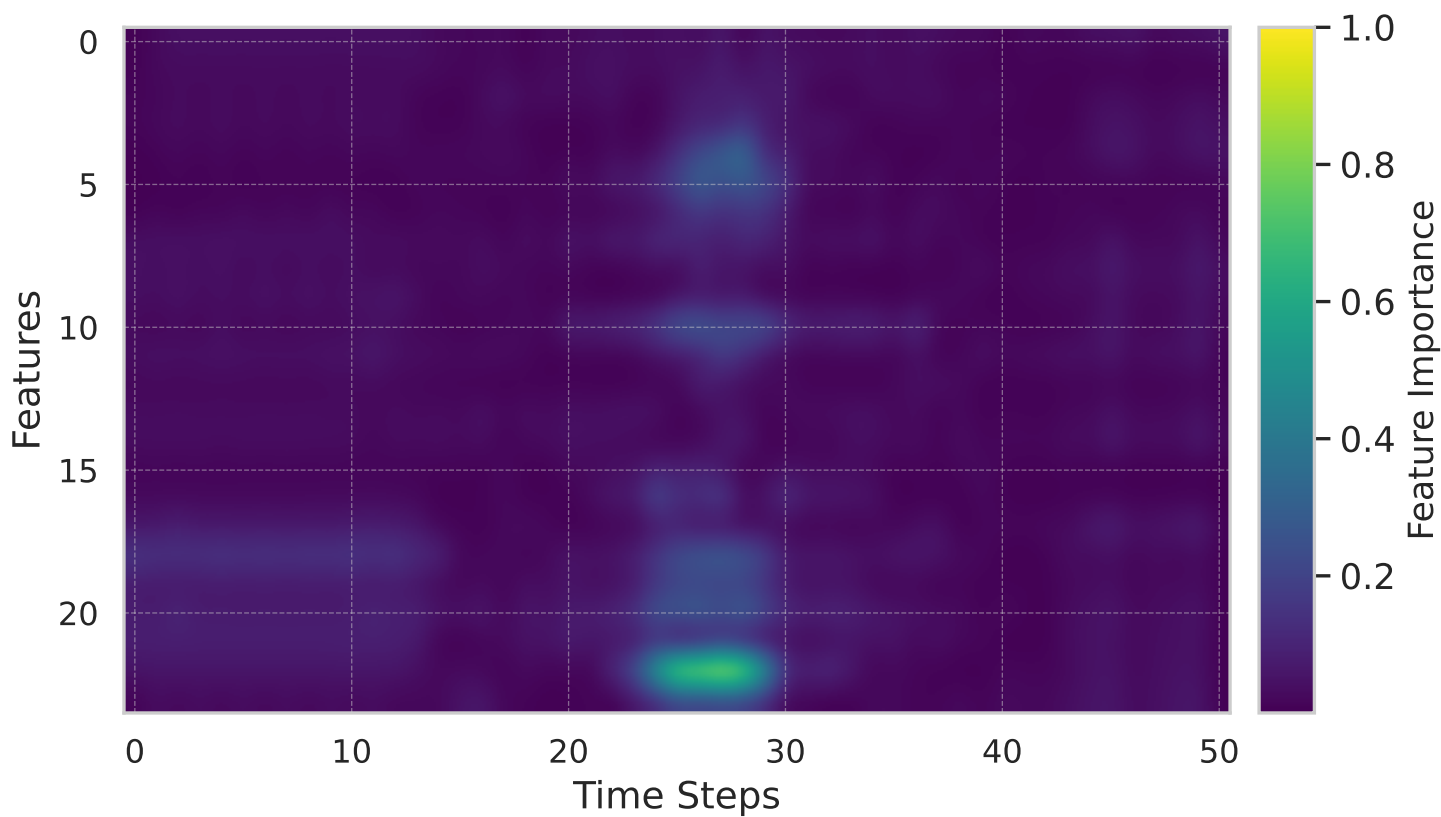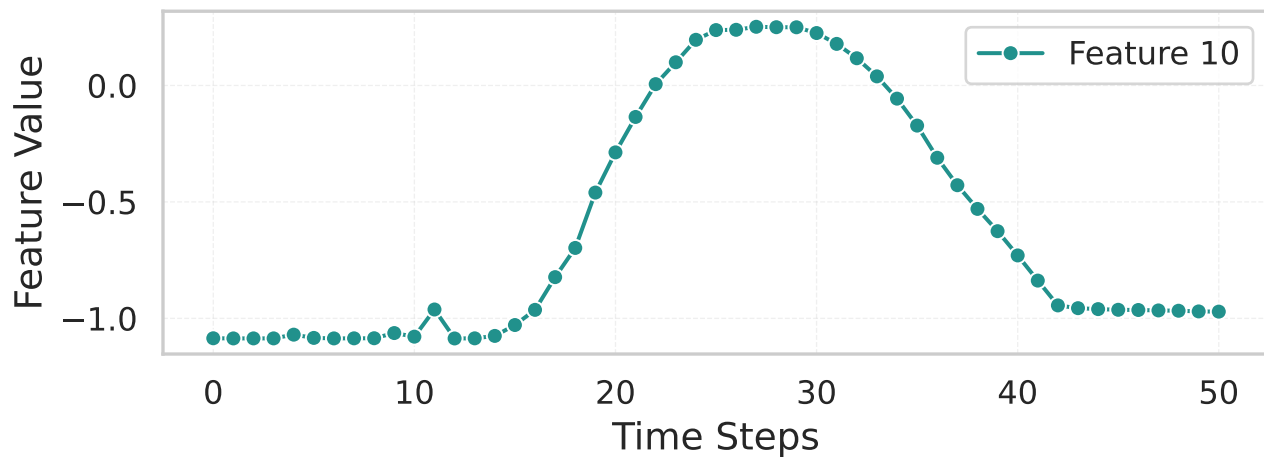

Sample Index: 15

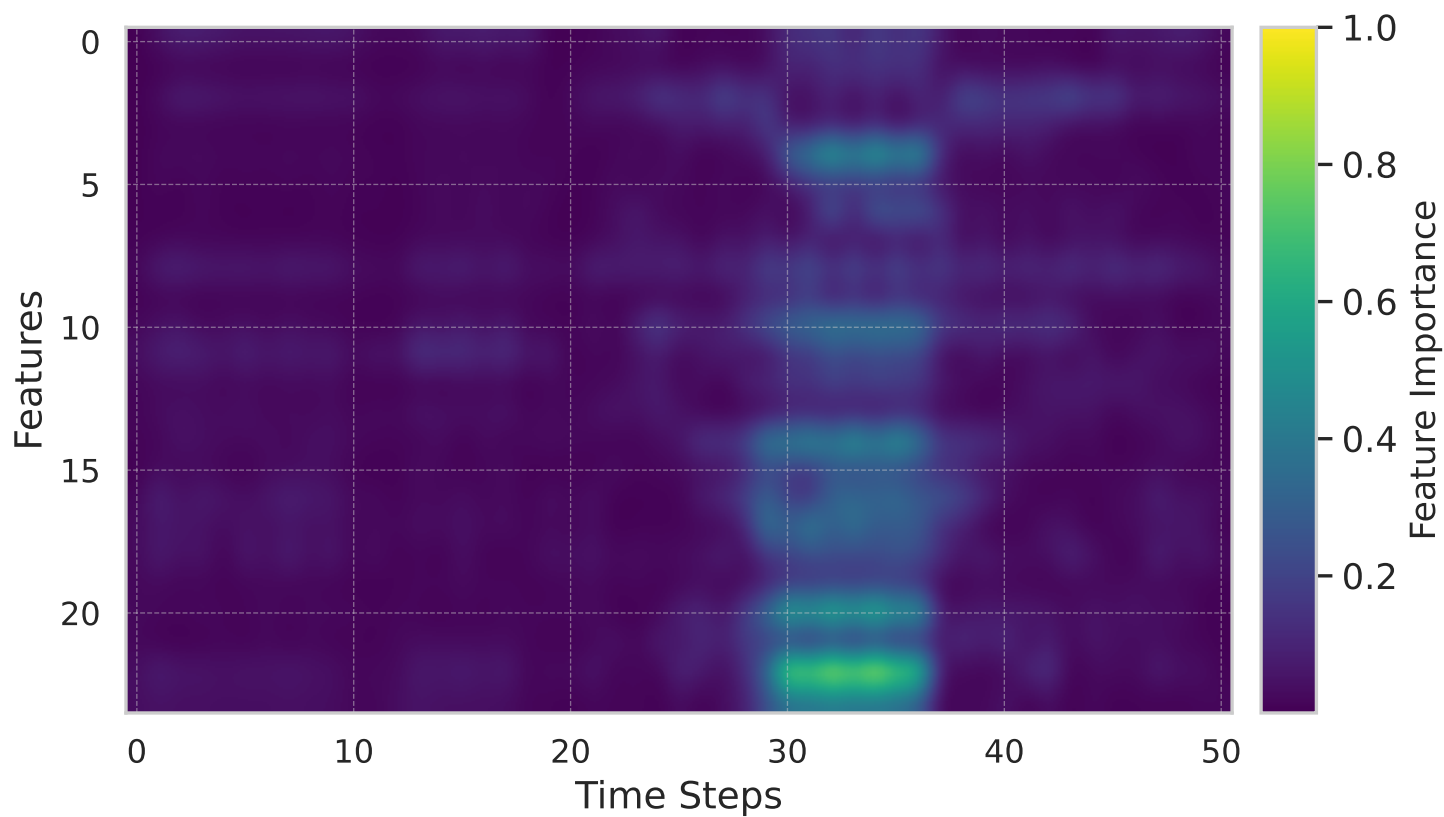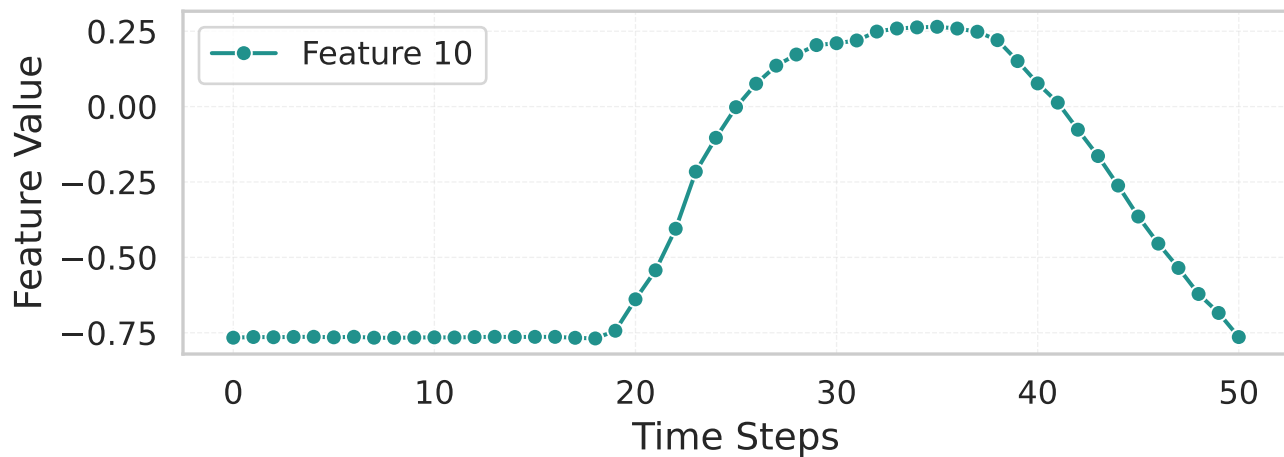

Sample Index: 16

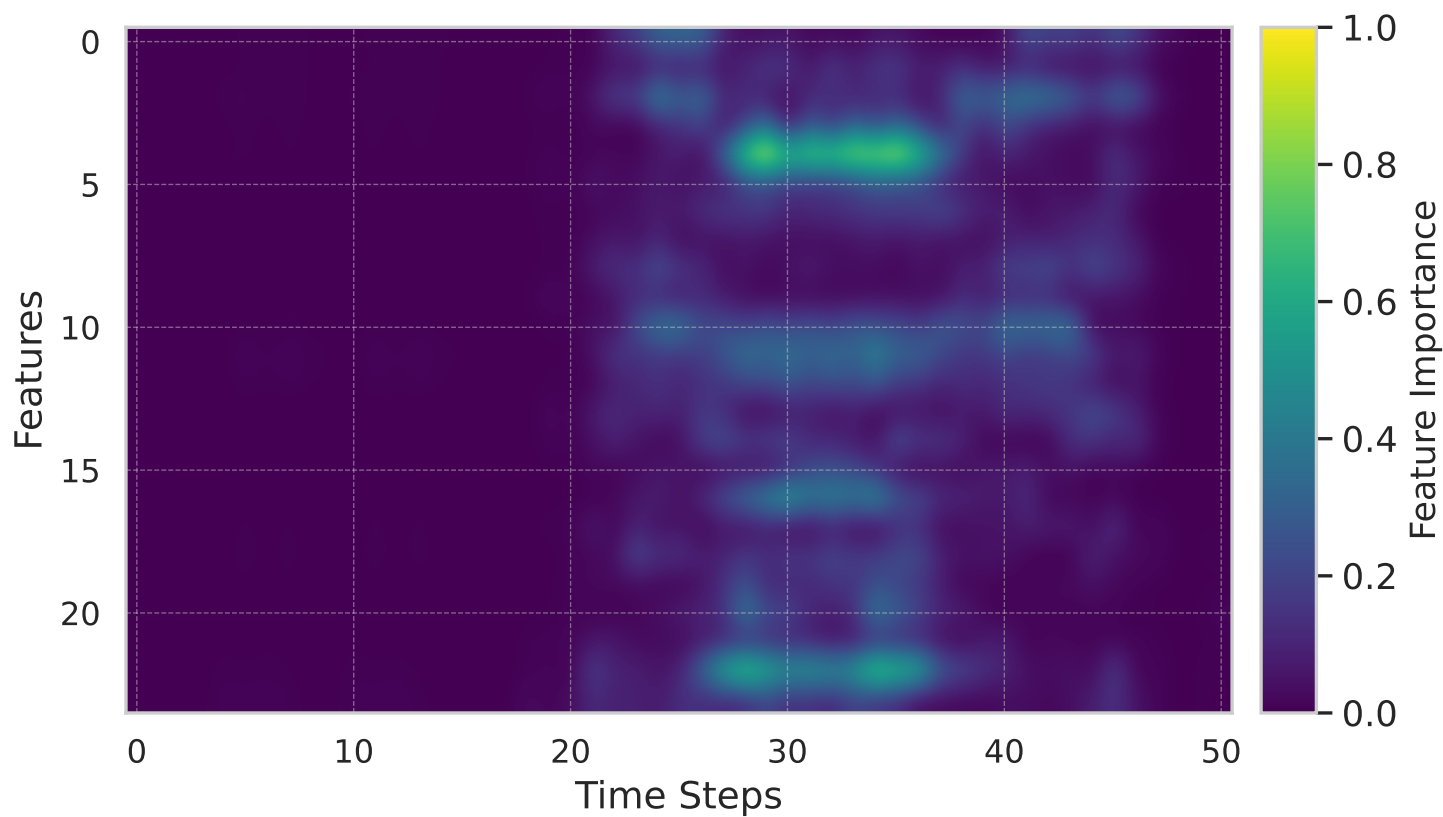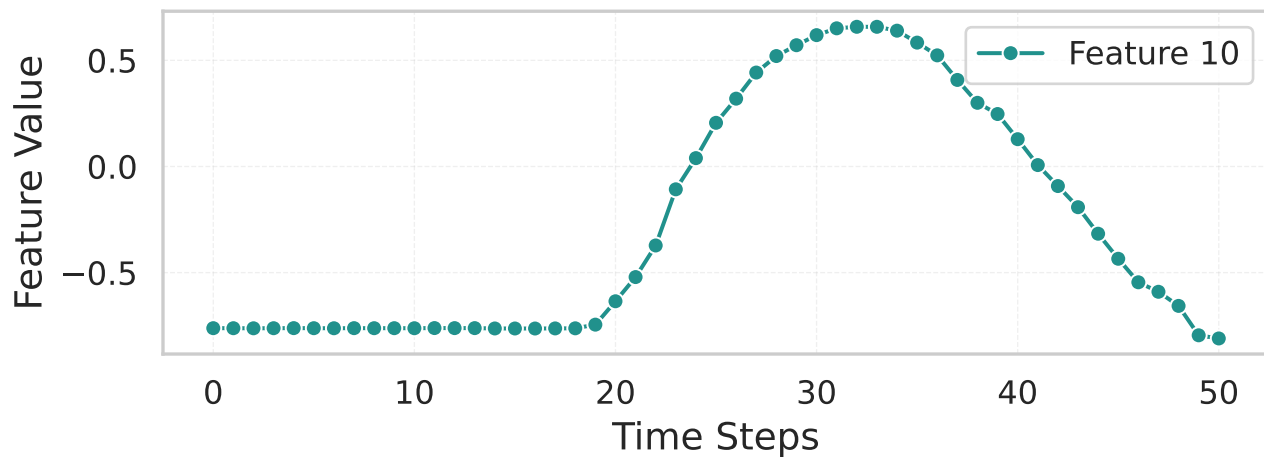

Sample Index: 17

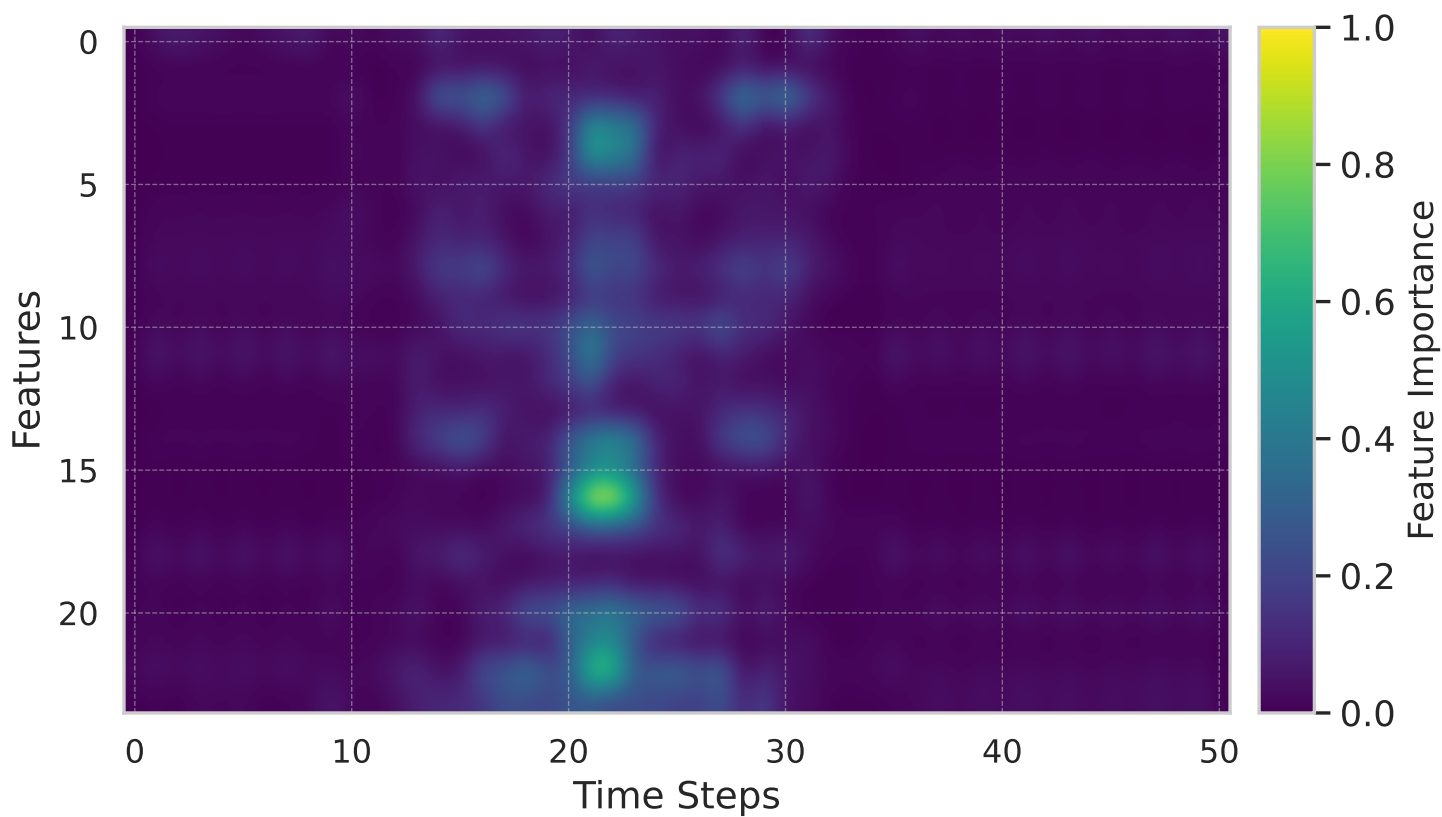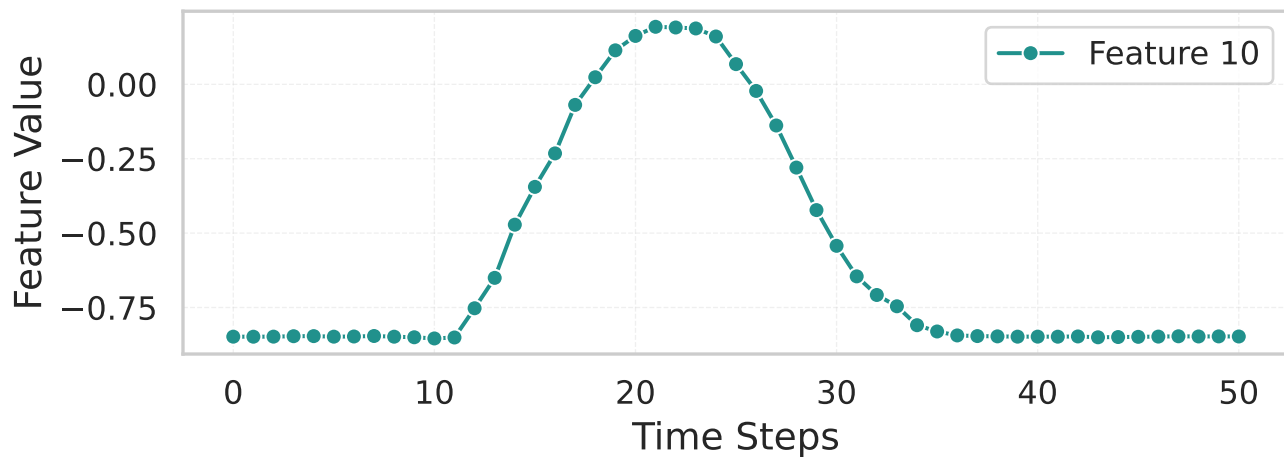

Sample Index: 18

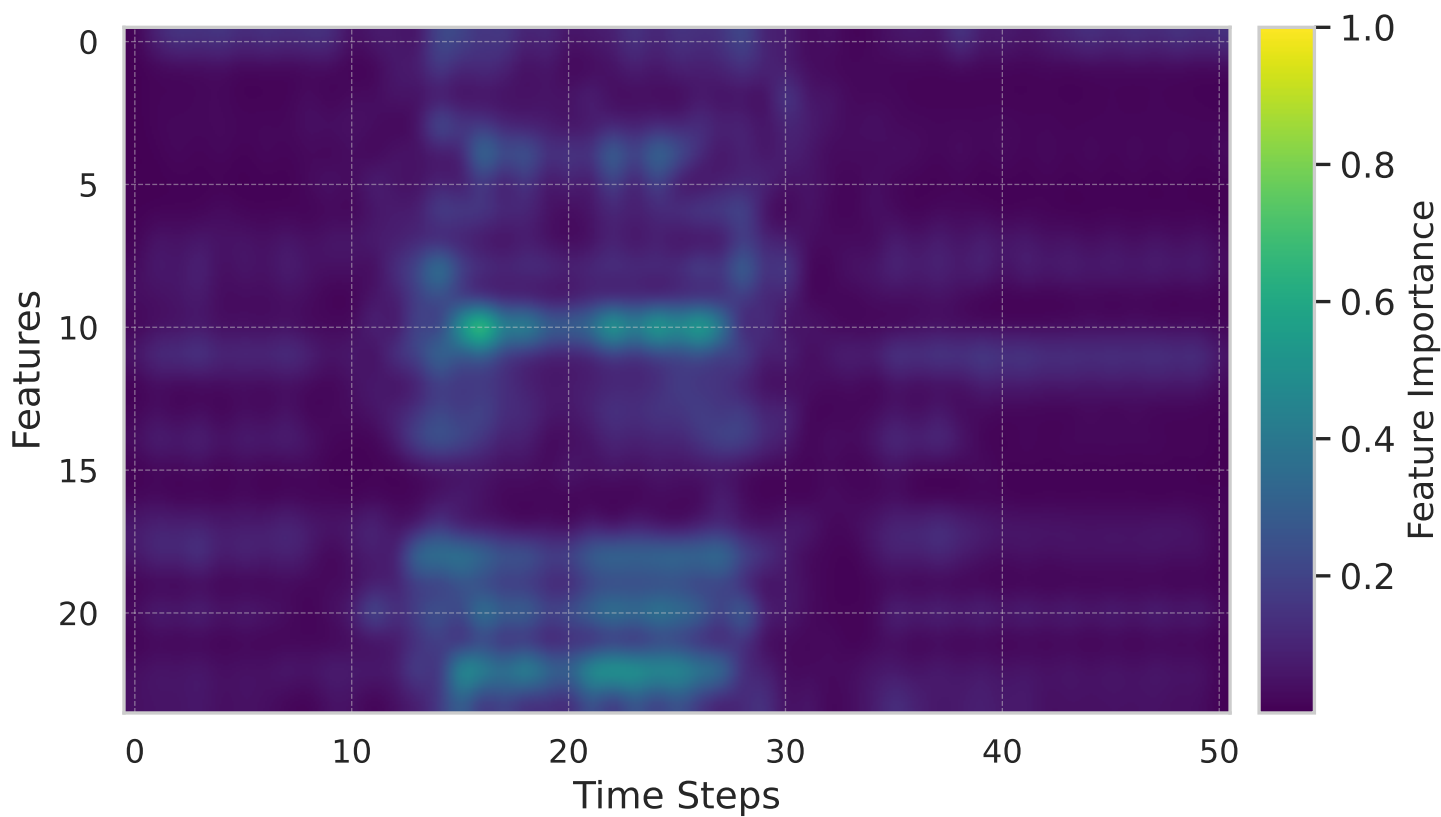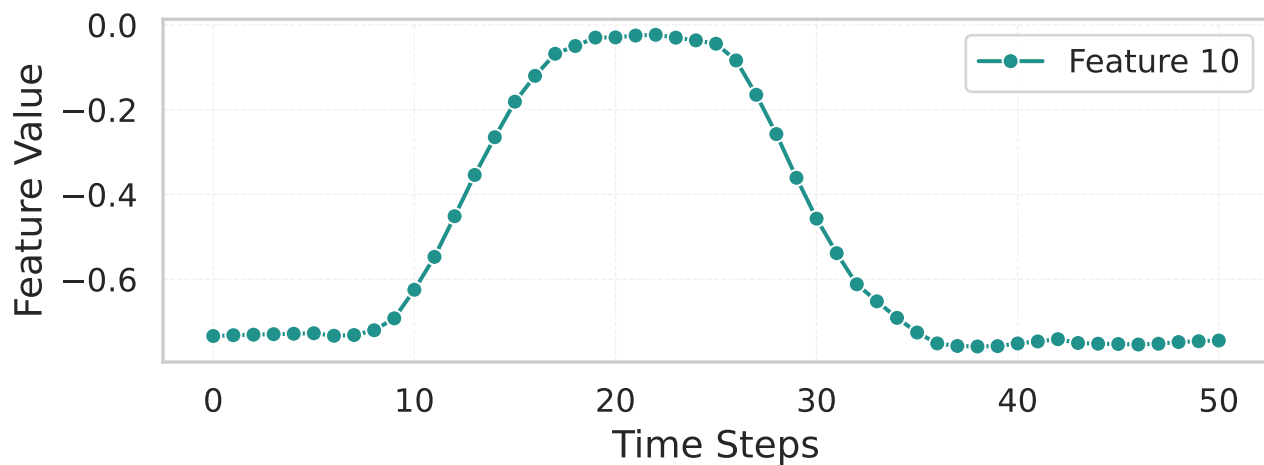

Sample Index: 19

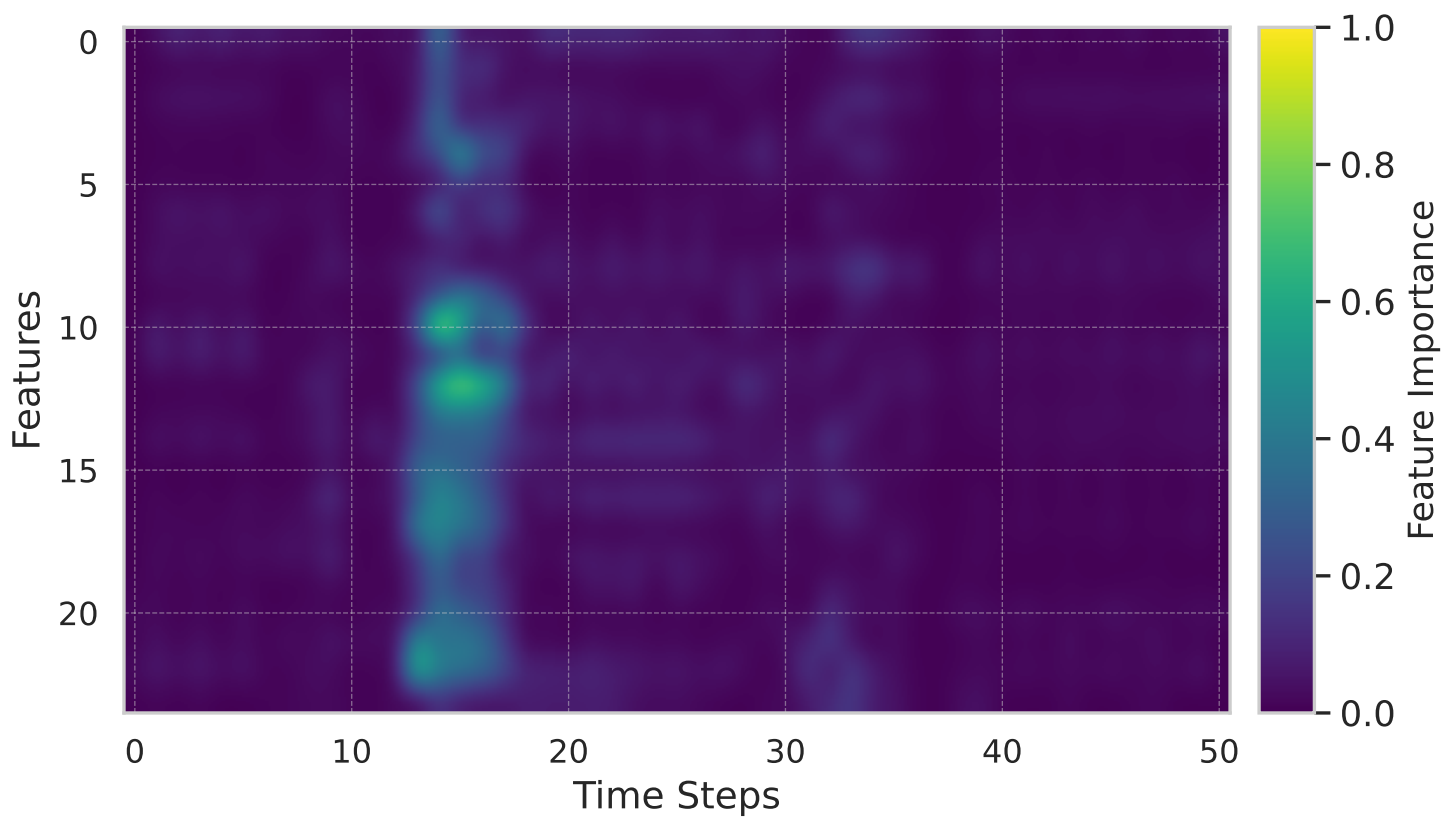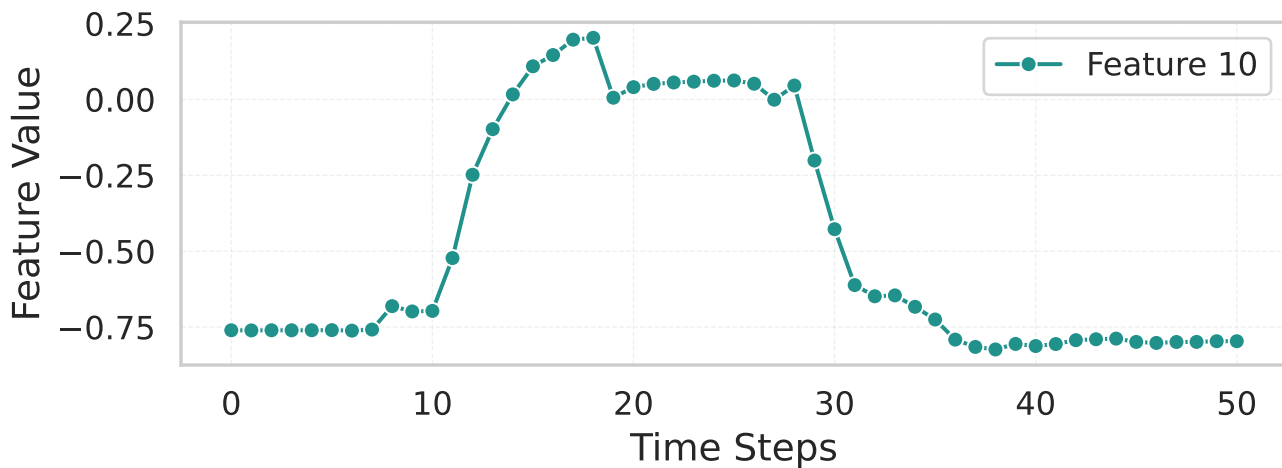



Sample Index: 20

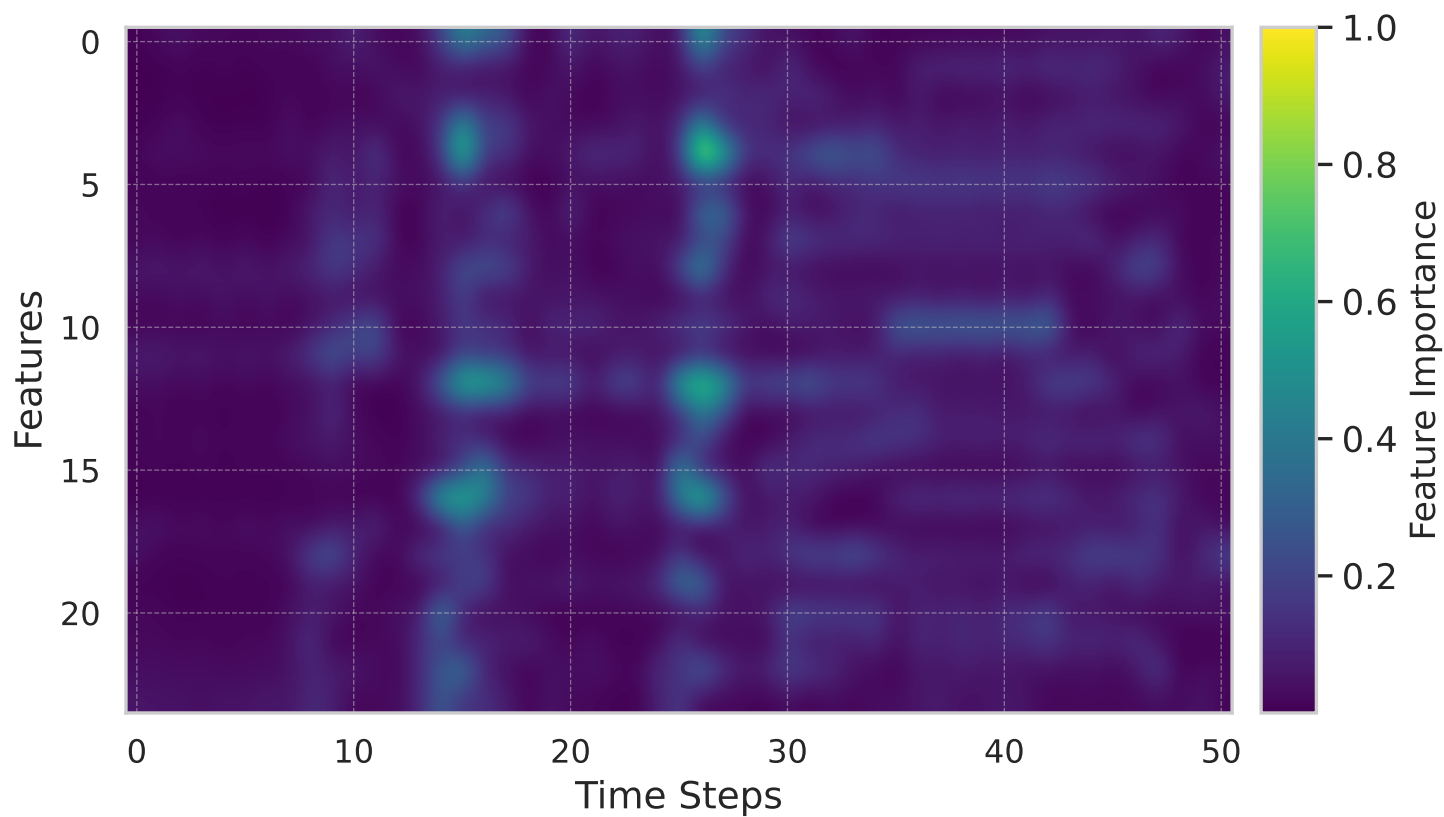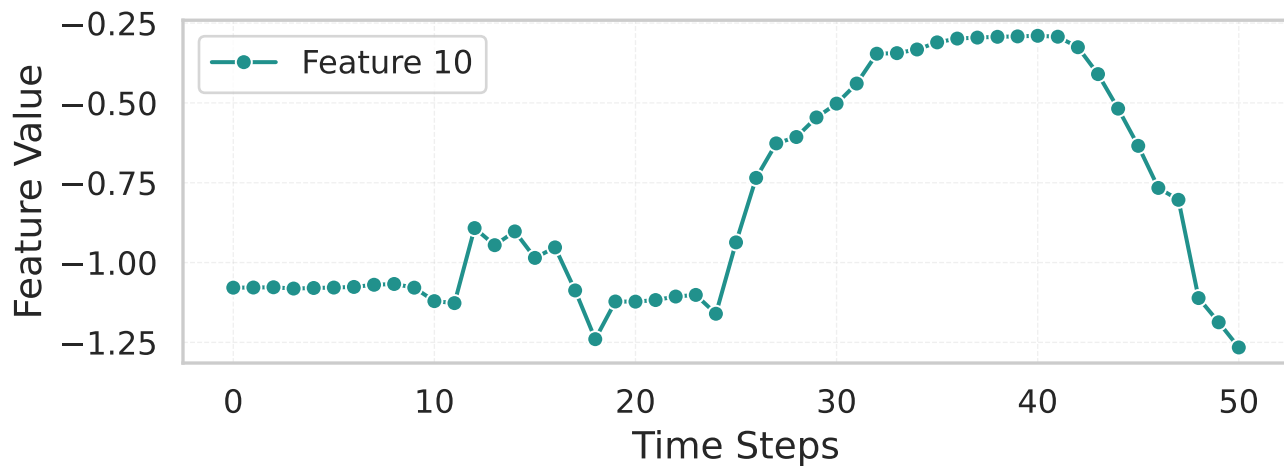

Sample Index: 21

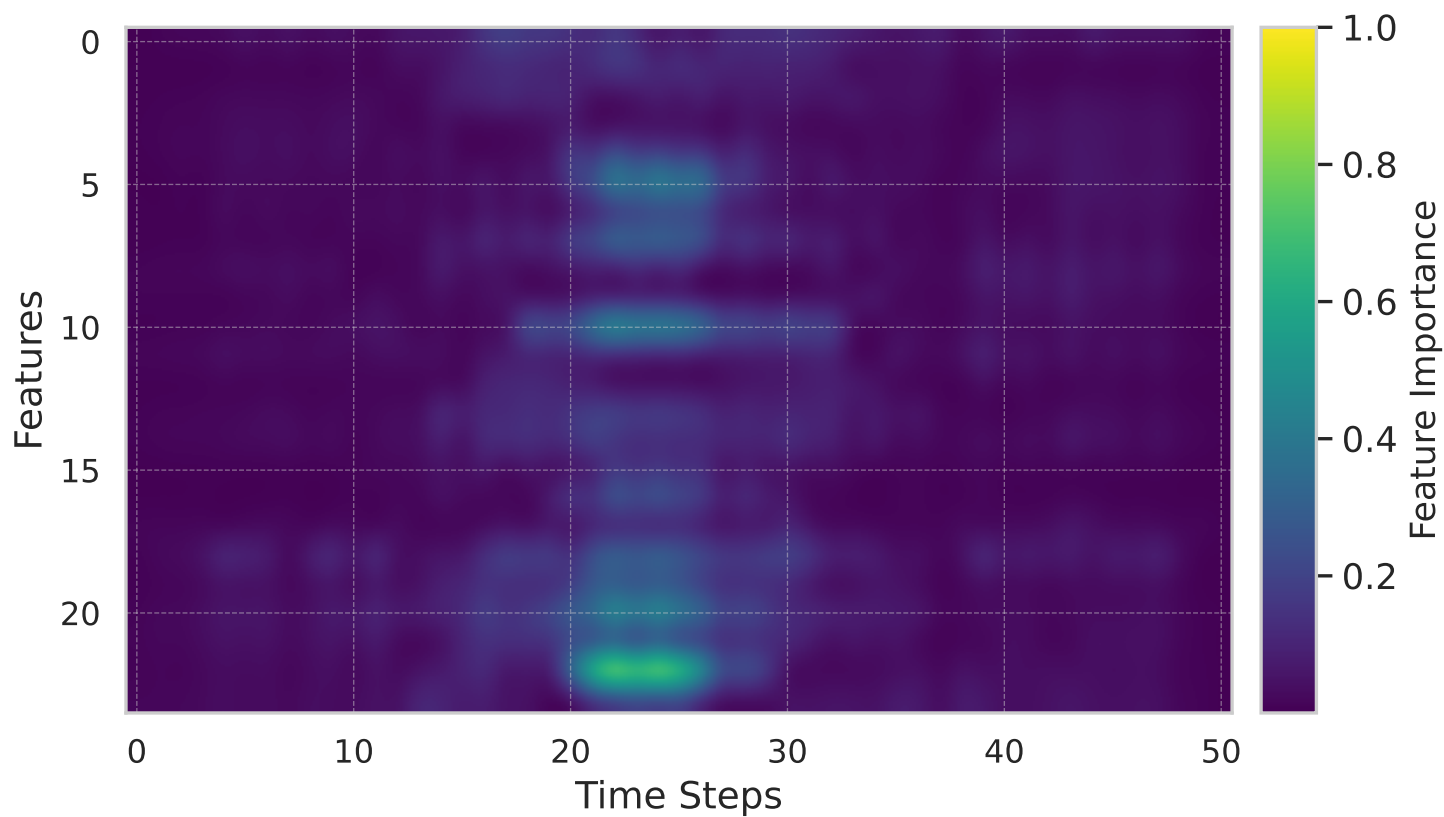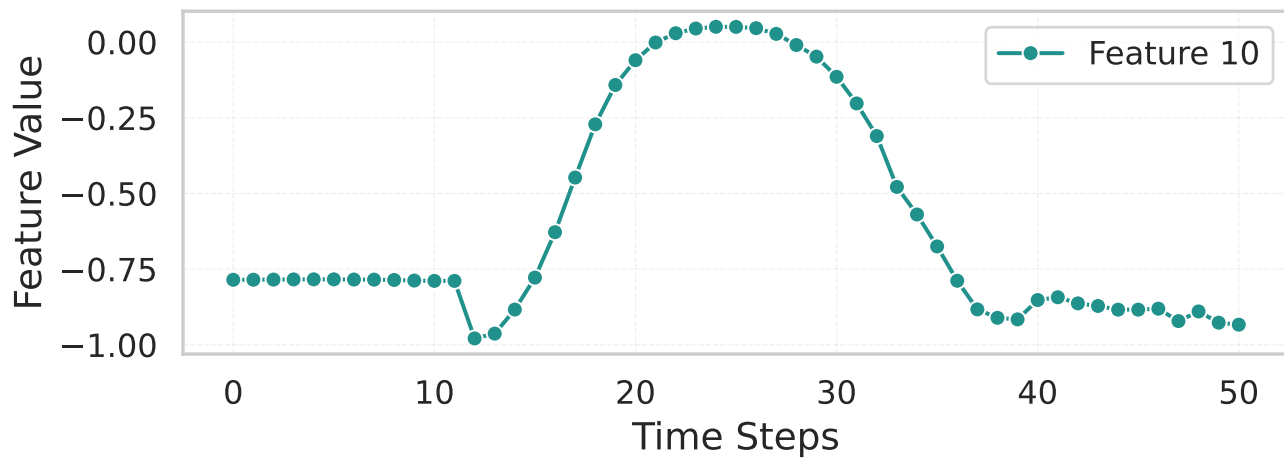

Sample Index: 22

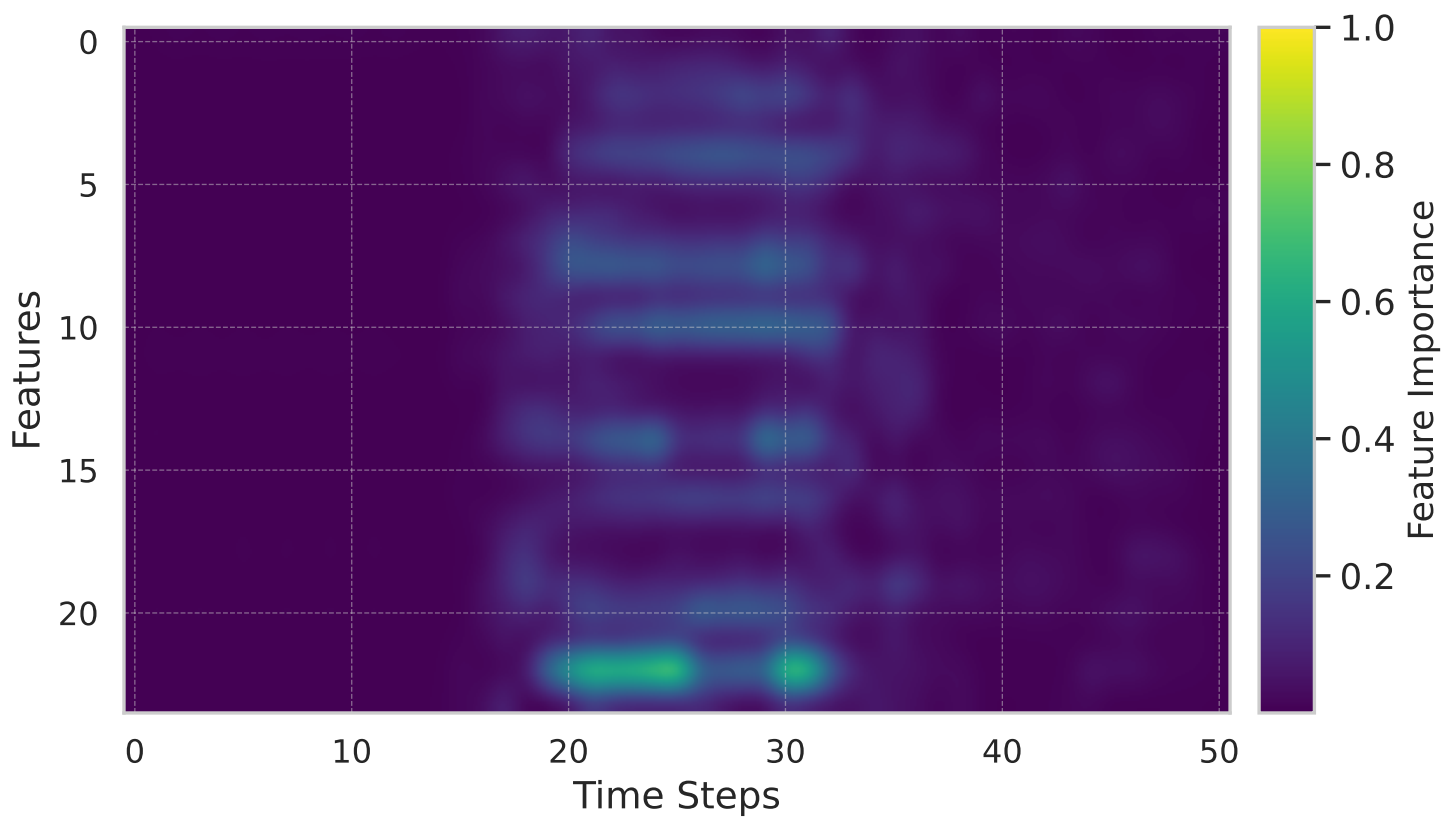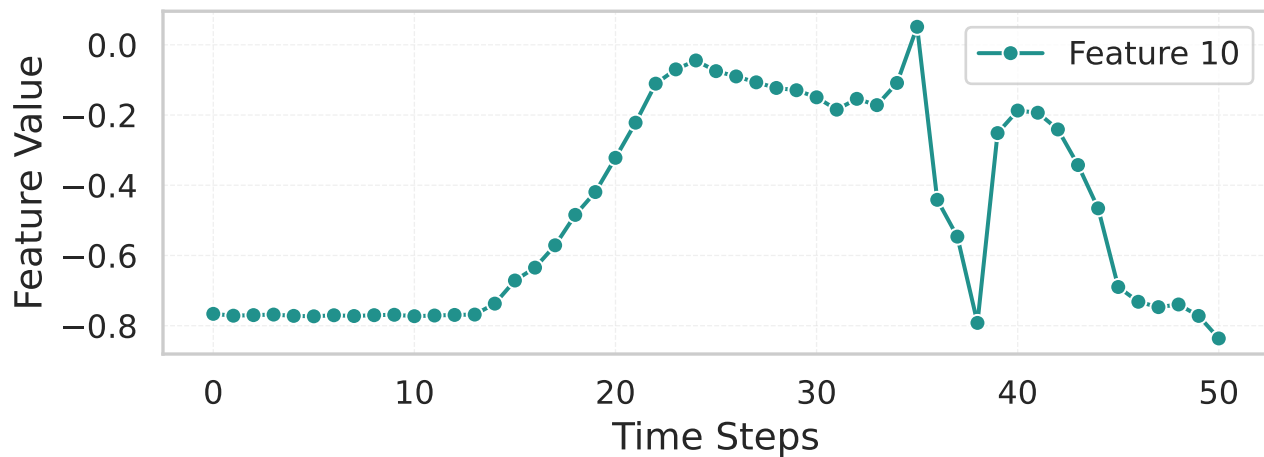

Sample Index: 23

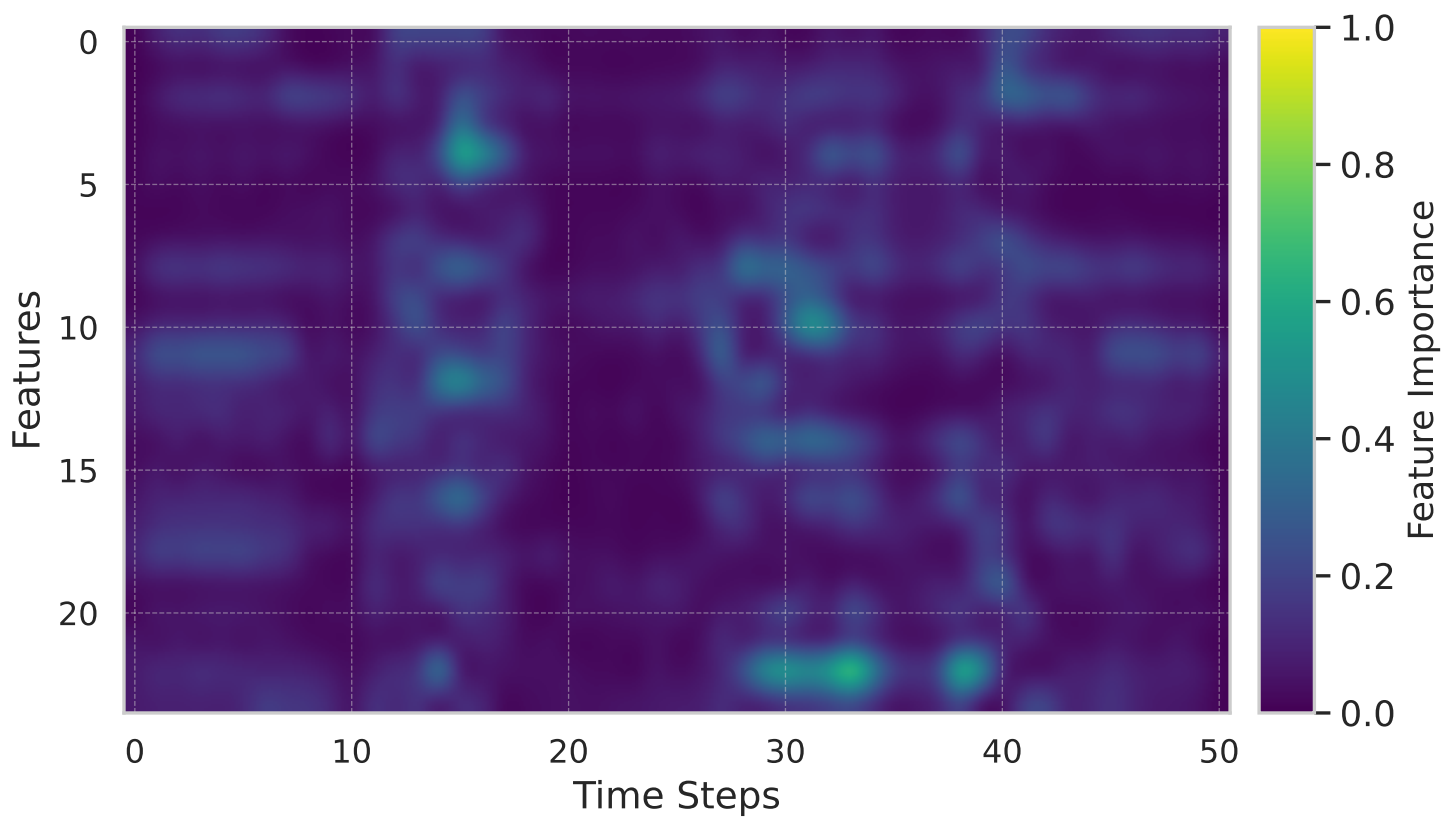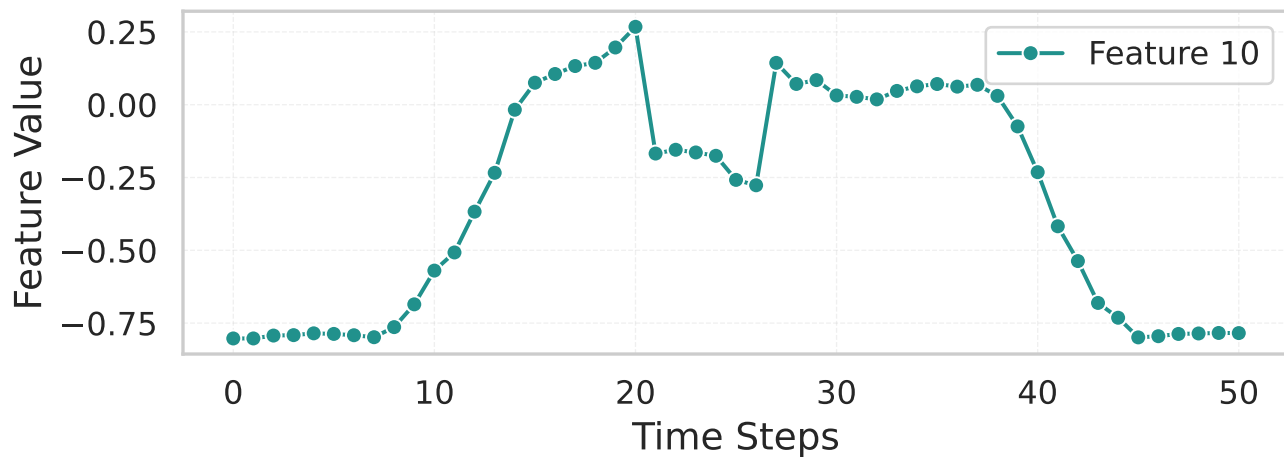

Sample Index: 24

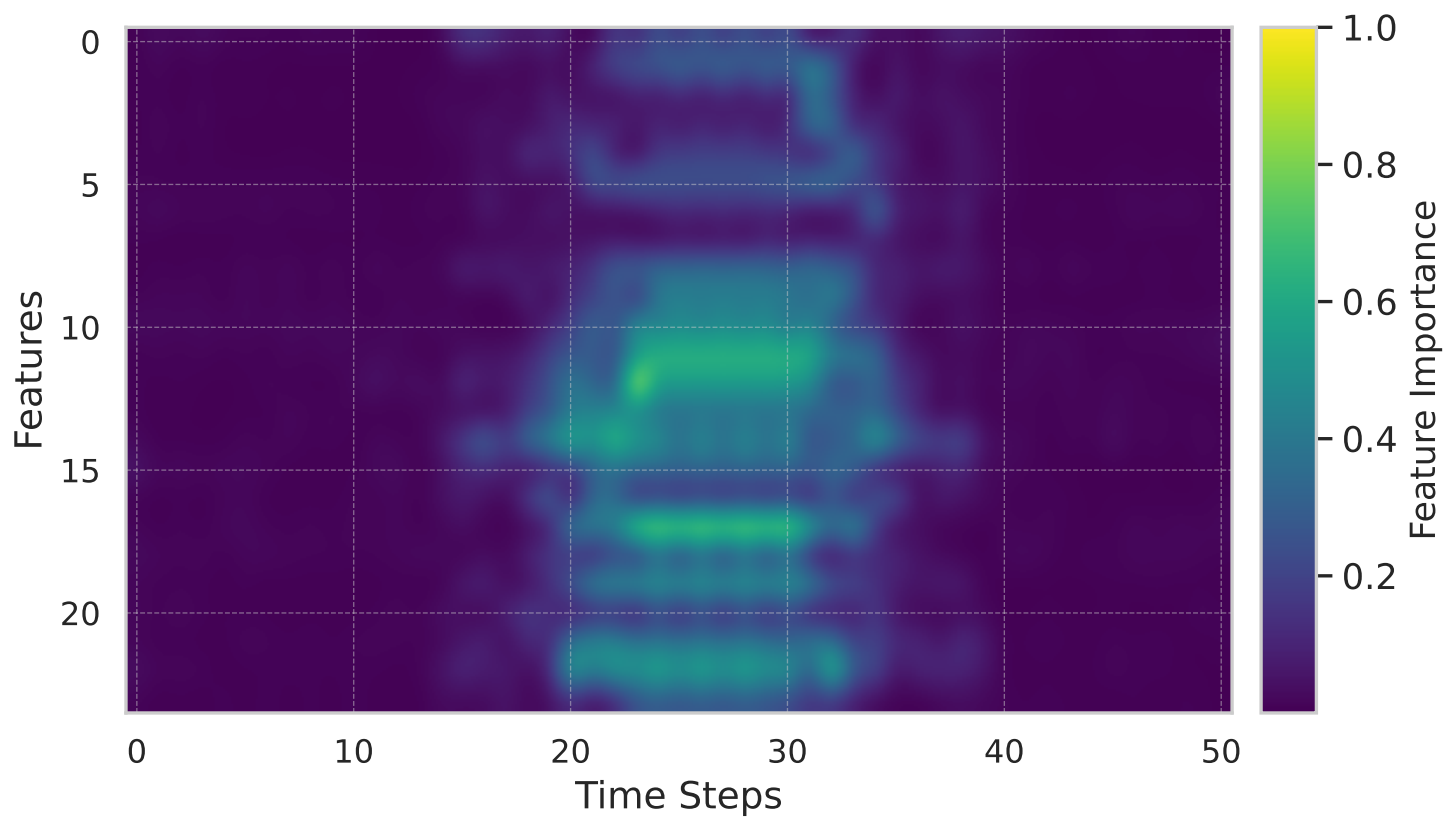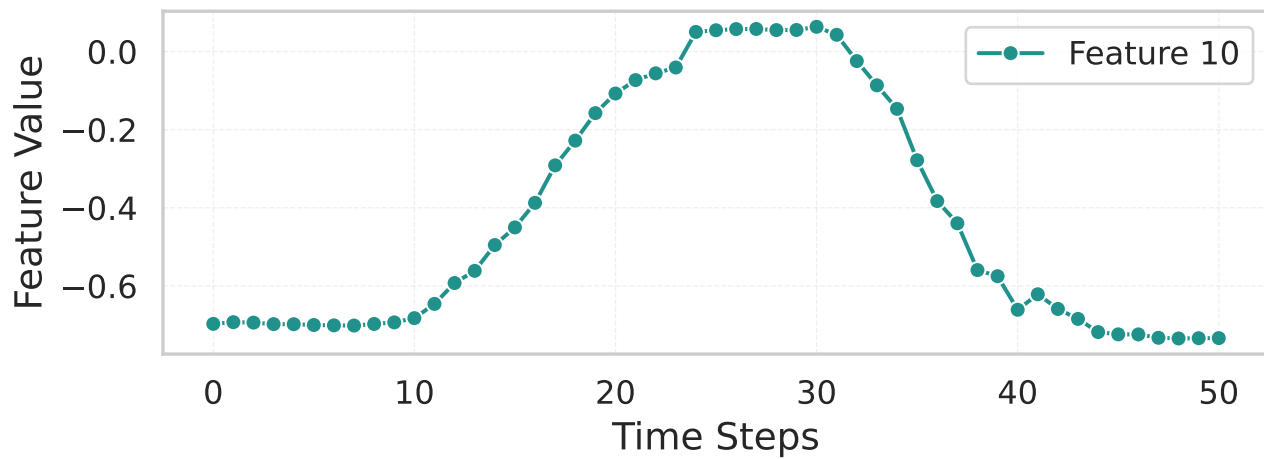

Sample Index: 25

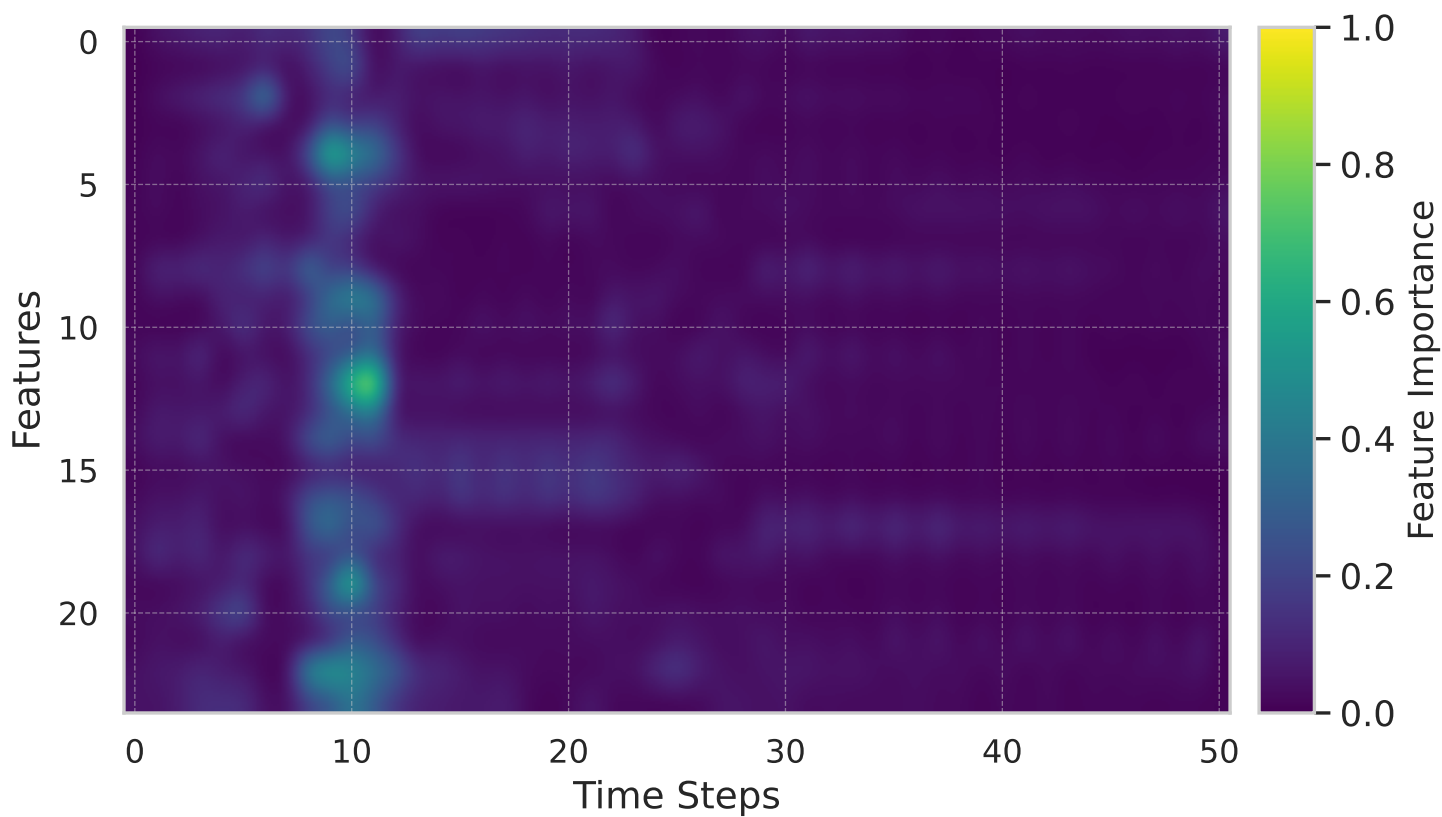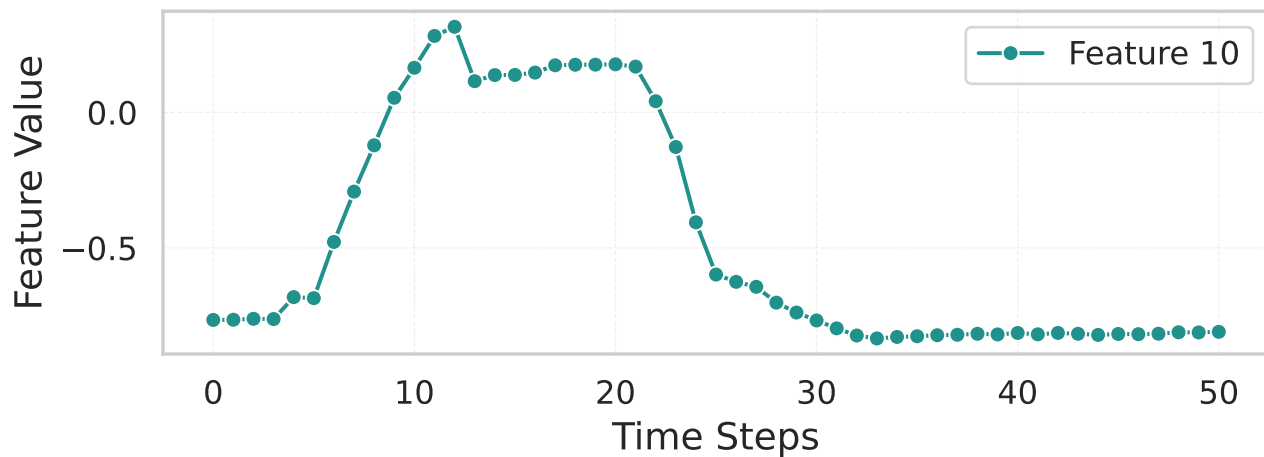

Sample Index: 26

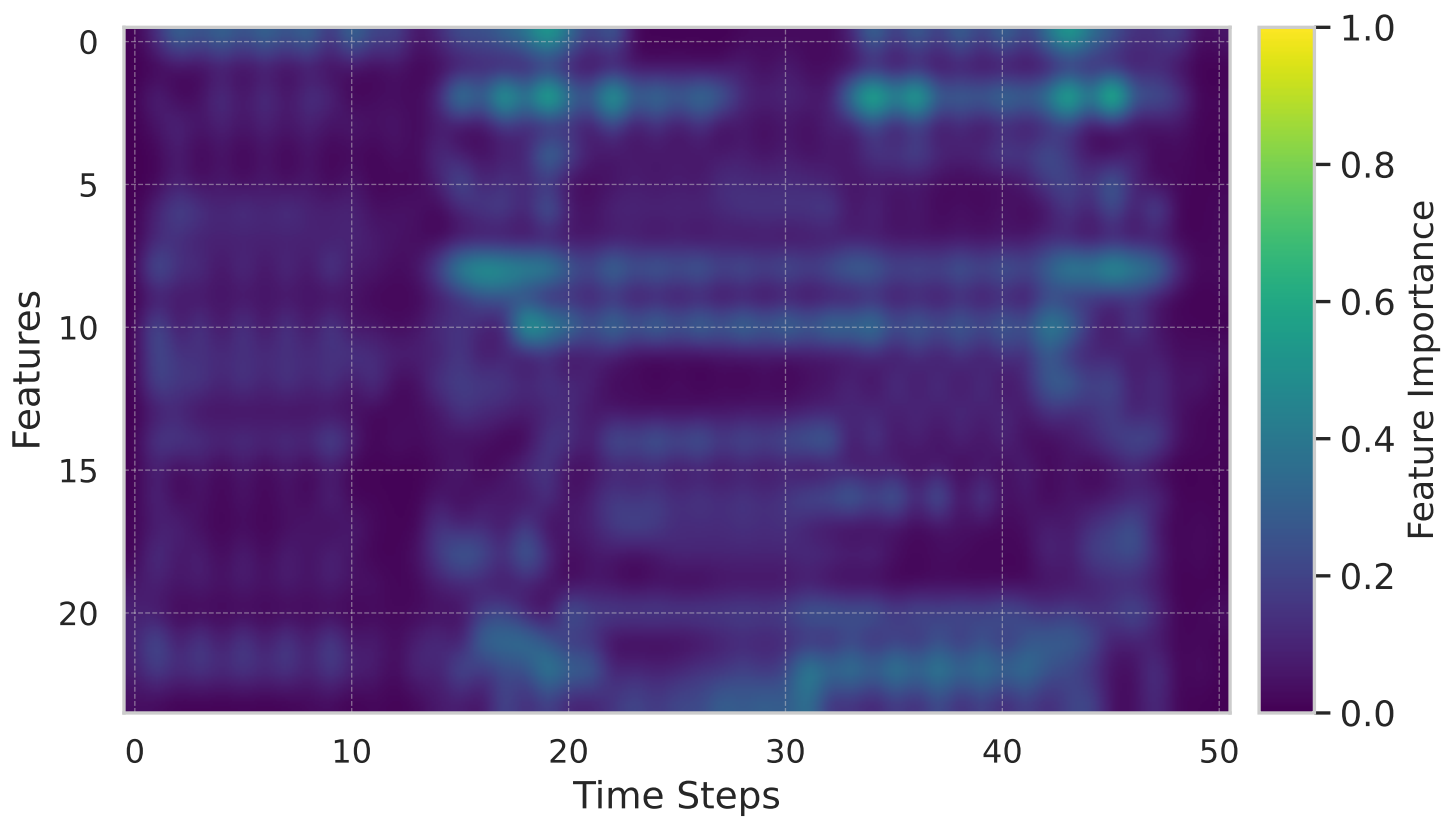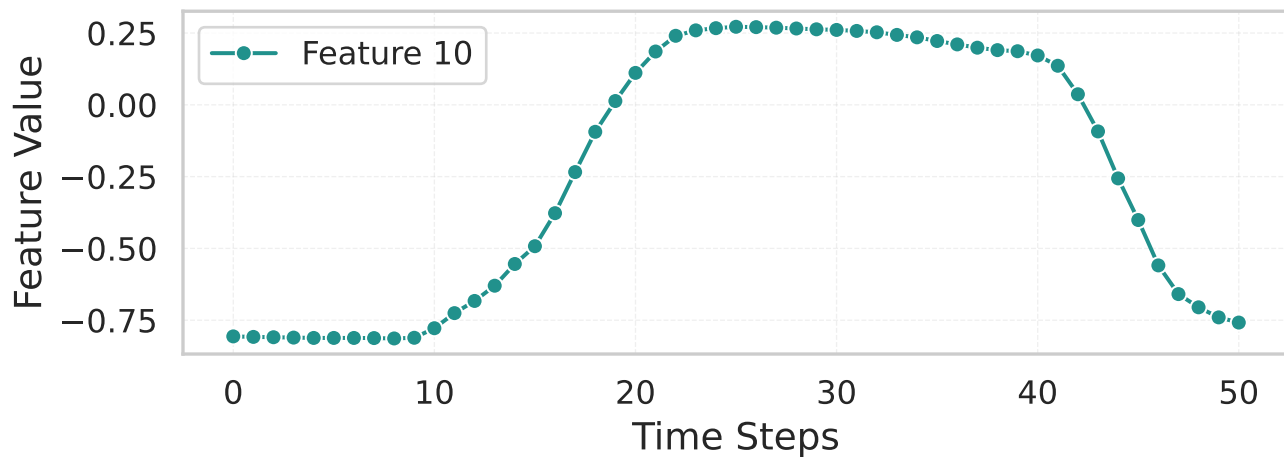

Sample Index: 27

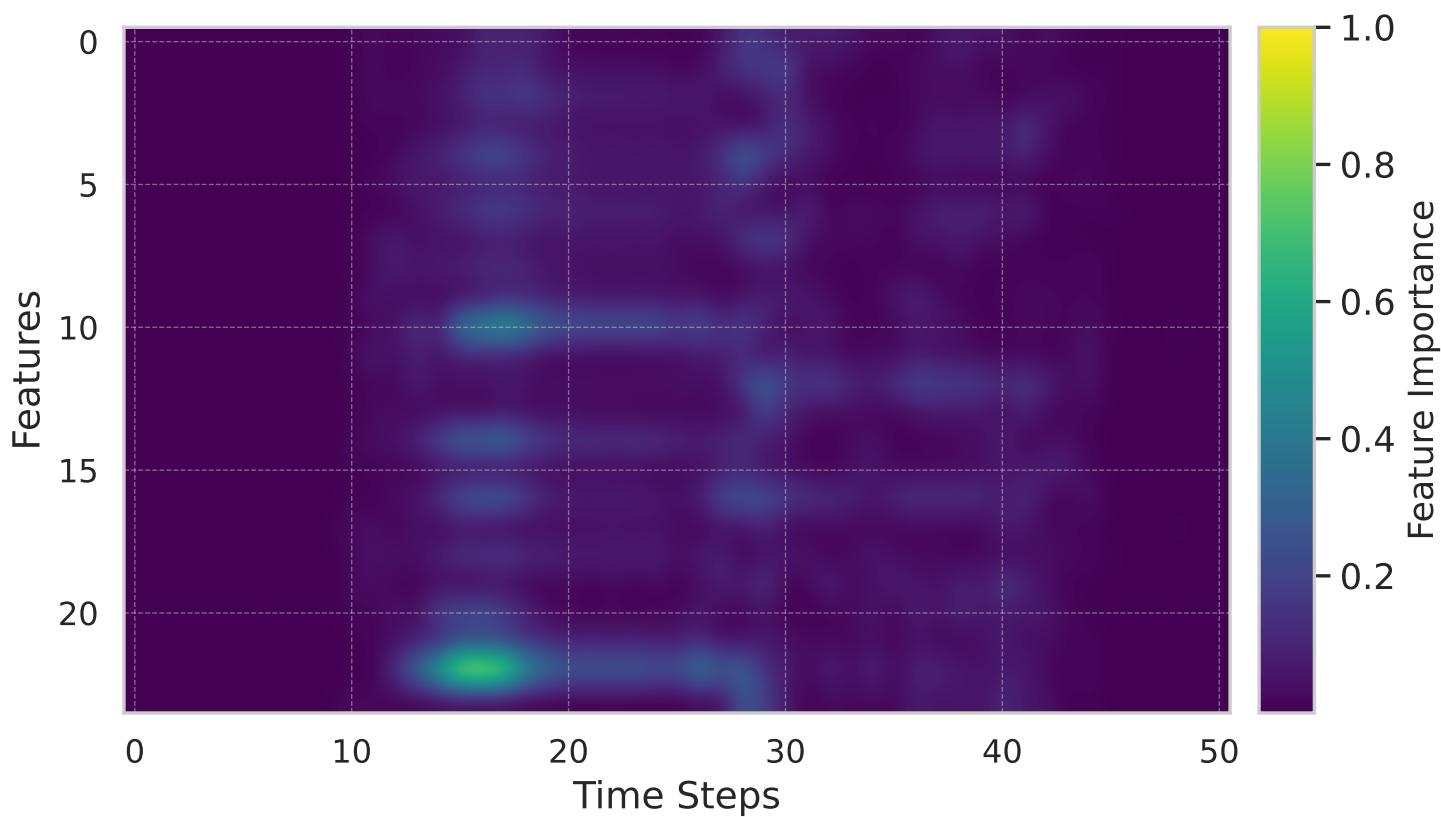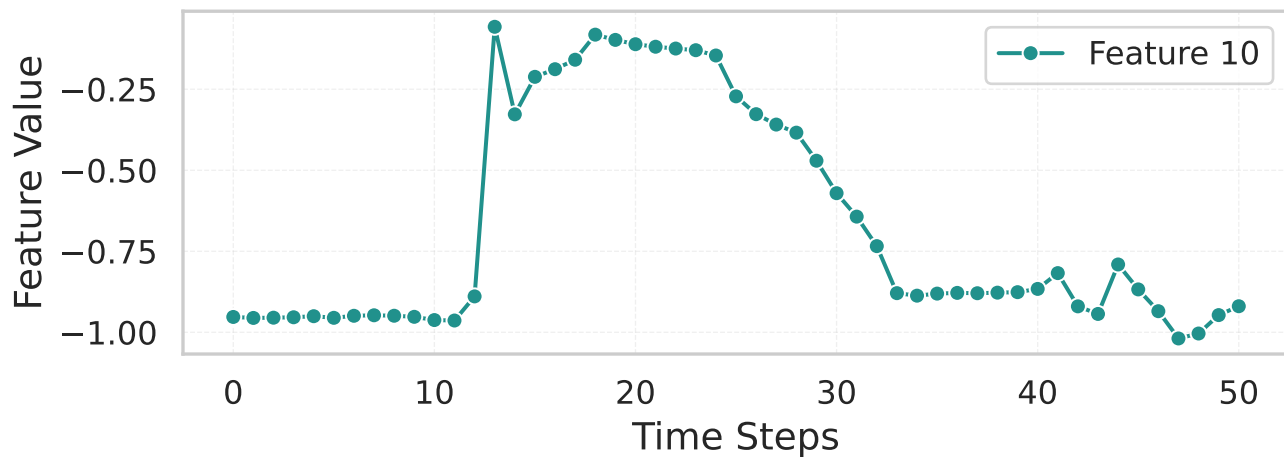



Sample Index: 28

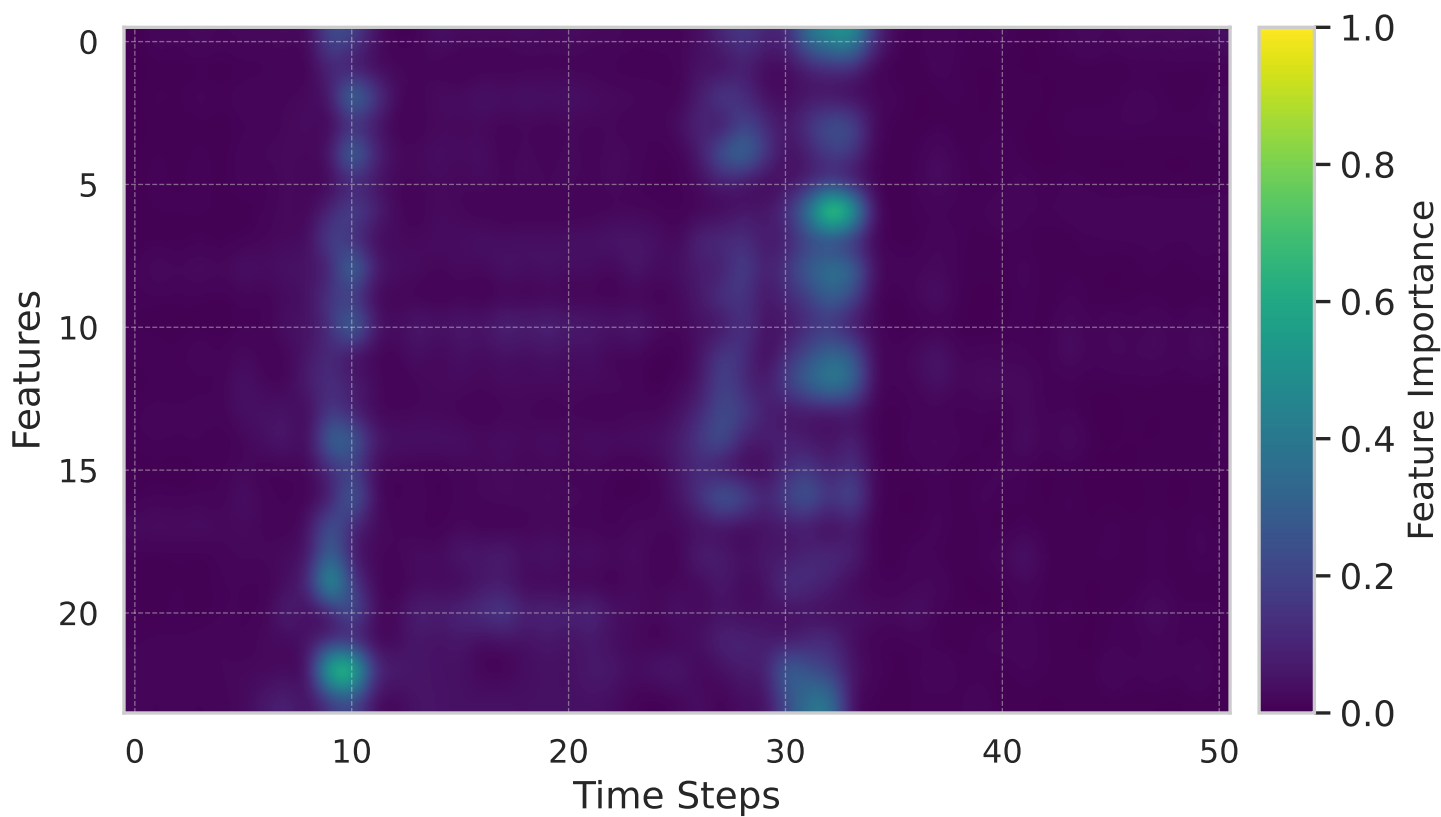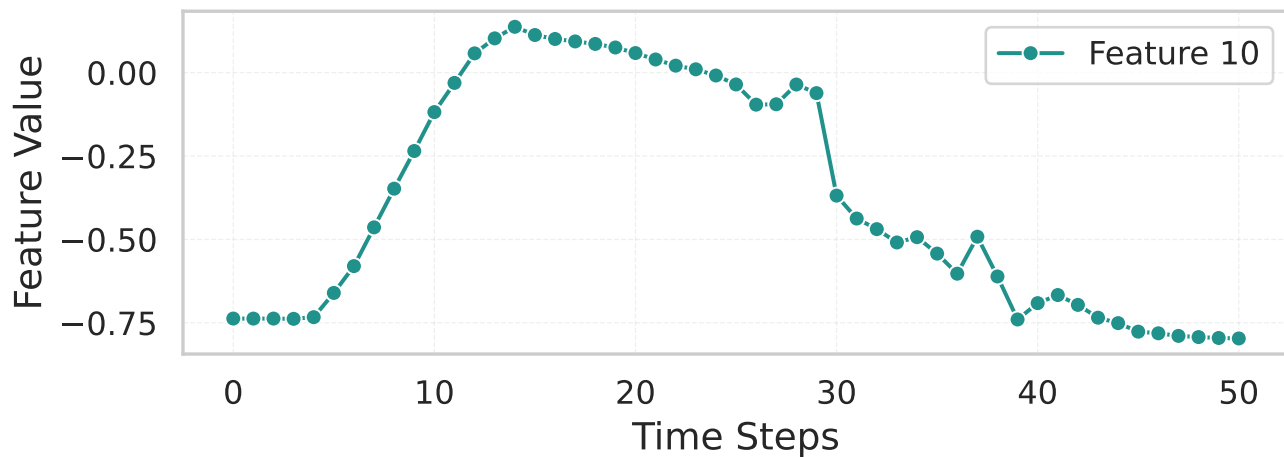

Sample Index: 29

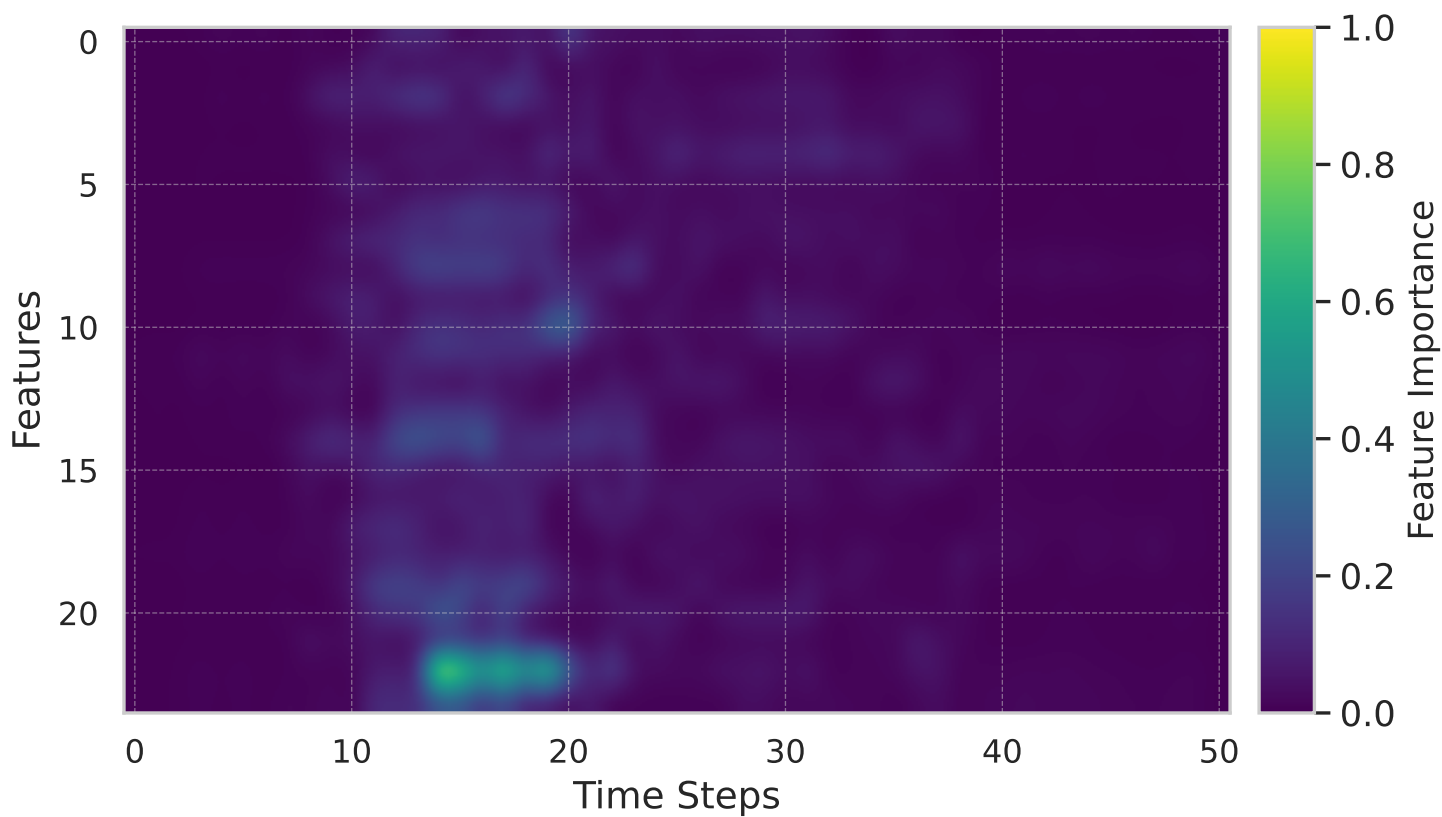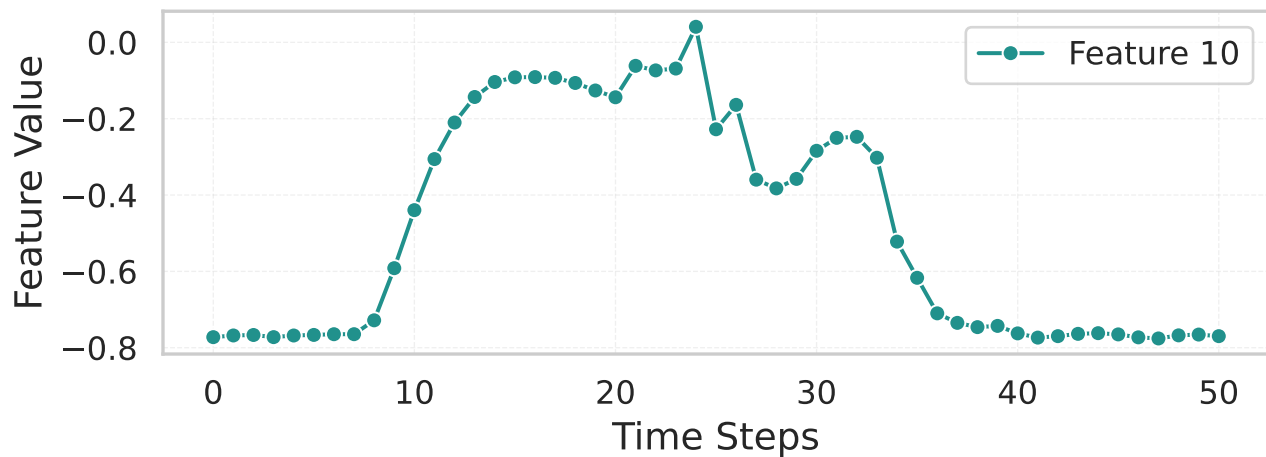

Sample Index: 30

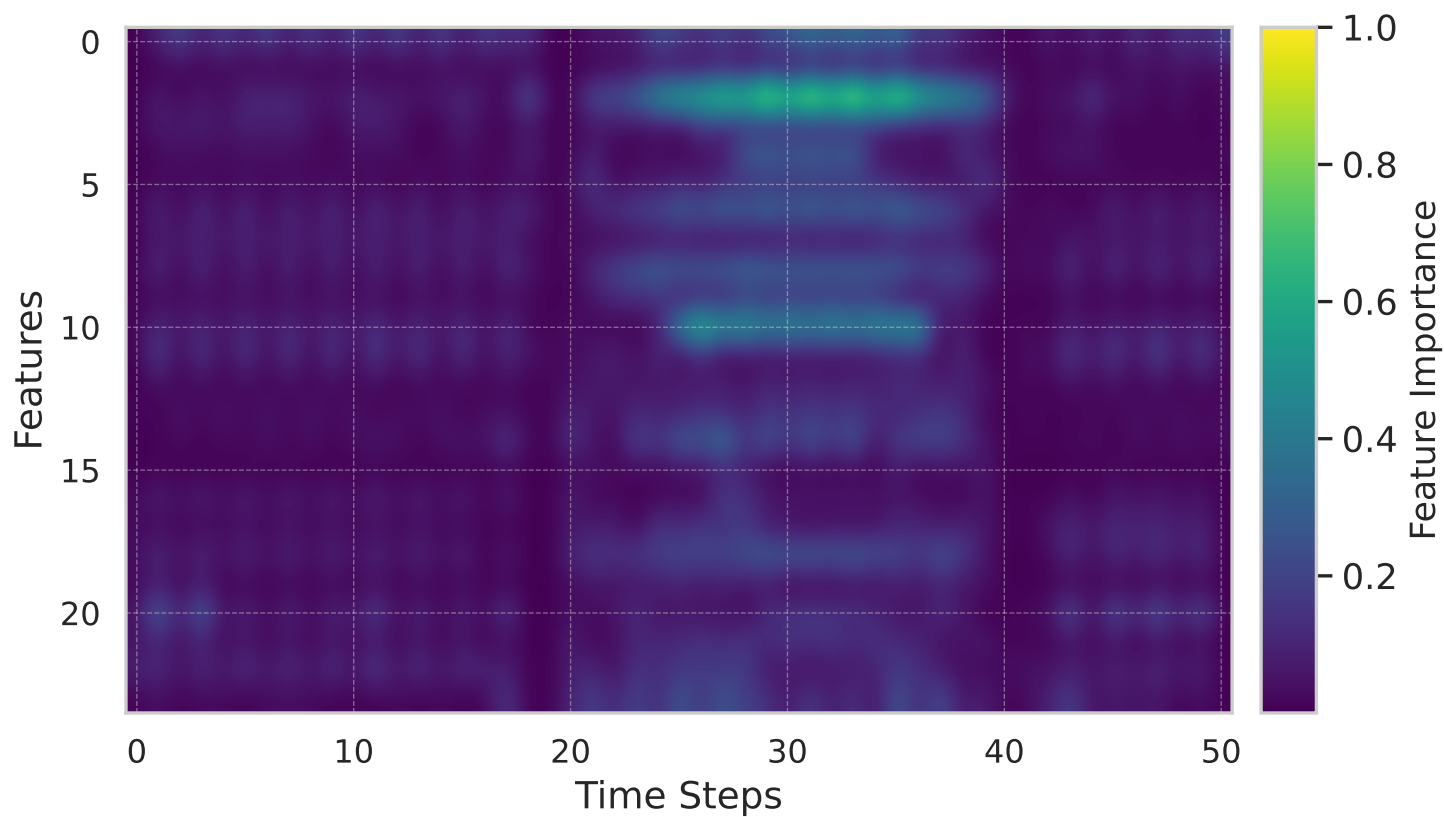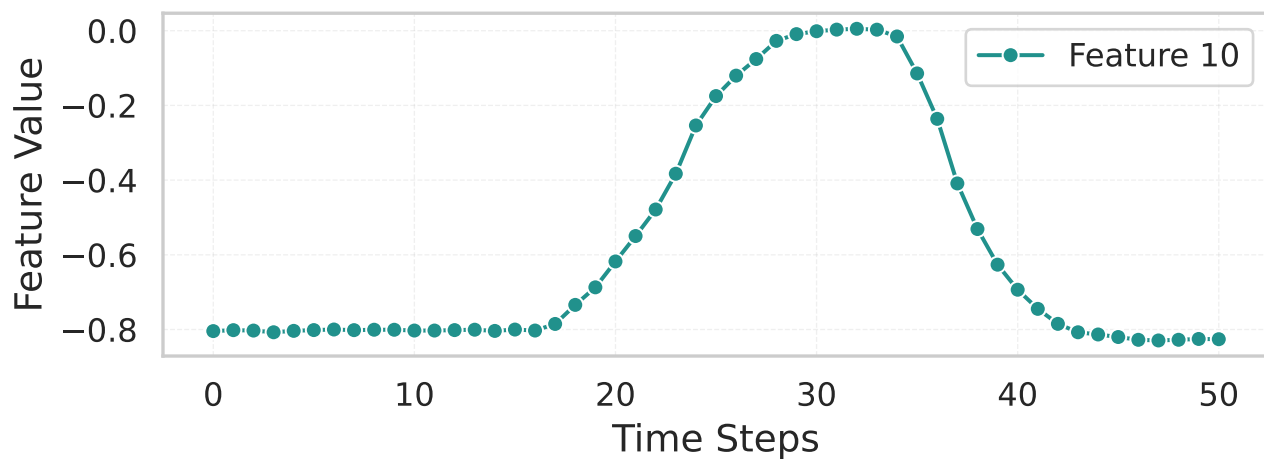

Sample Index: 31

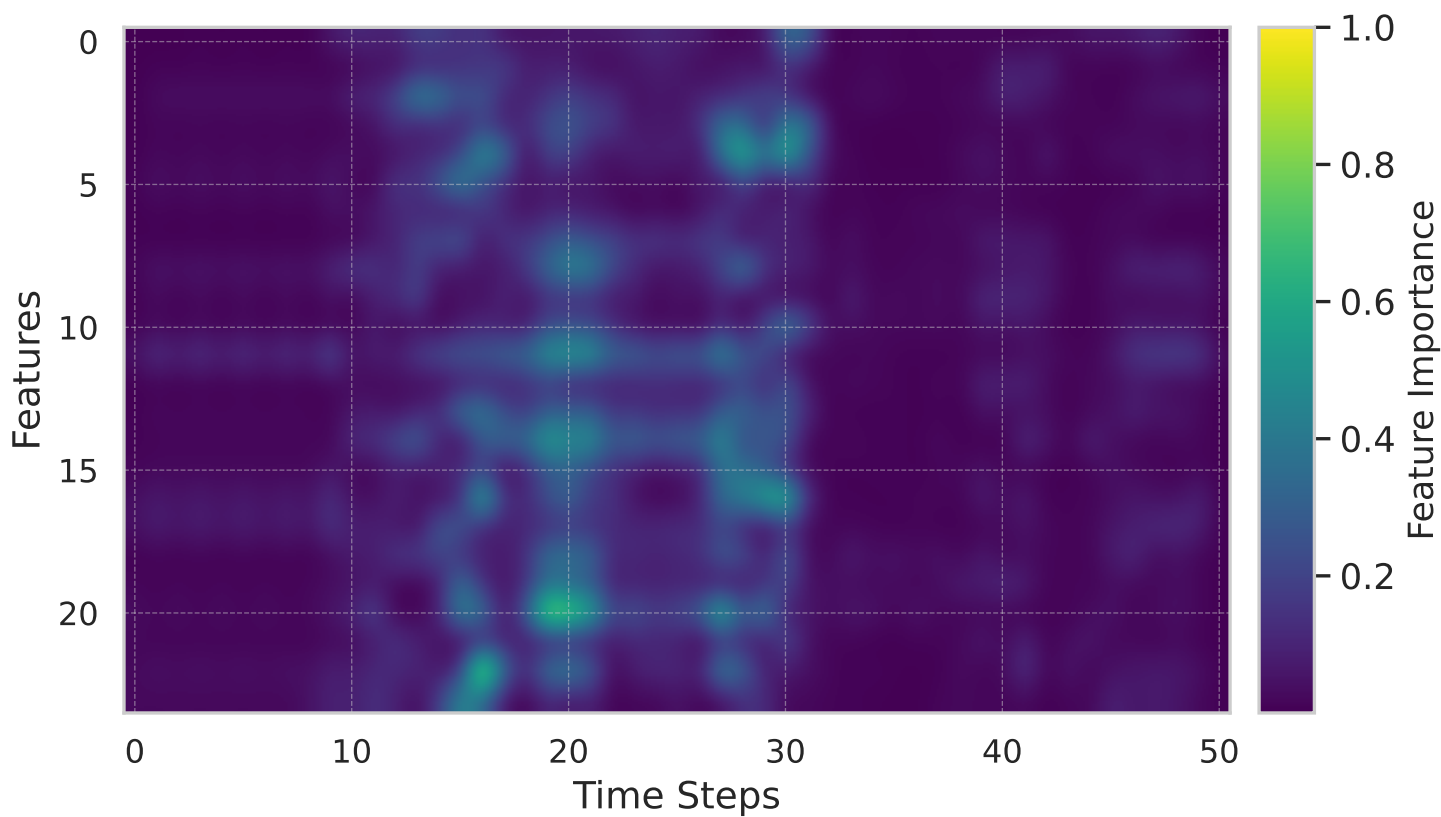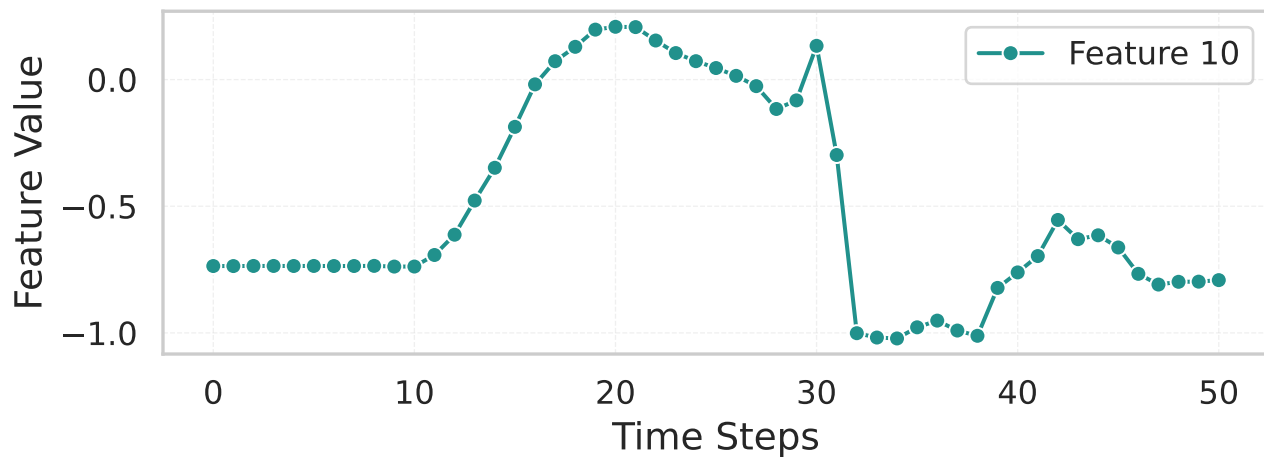

Sample Index: 32

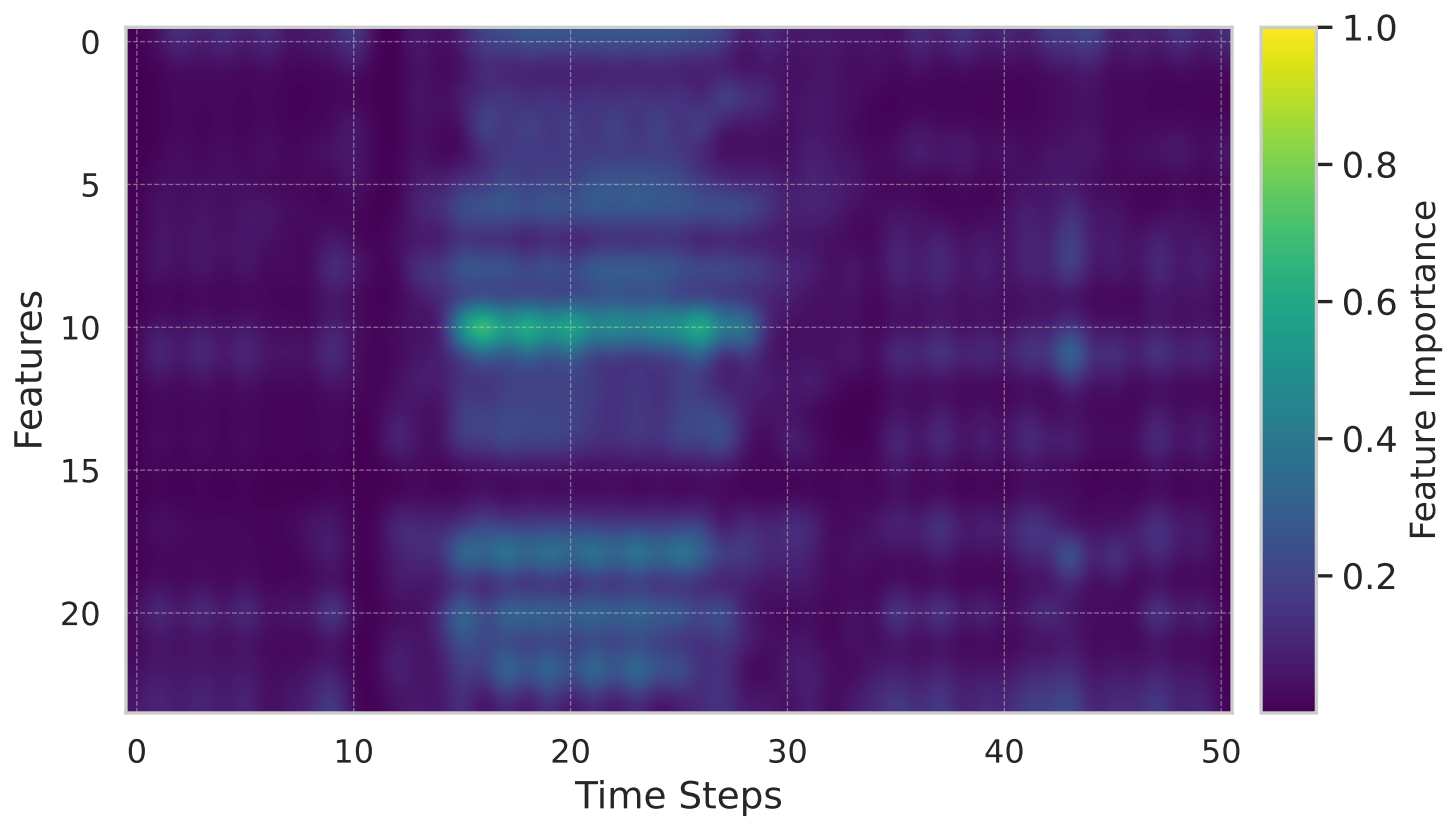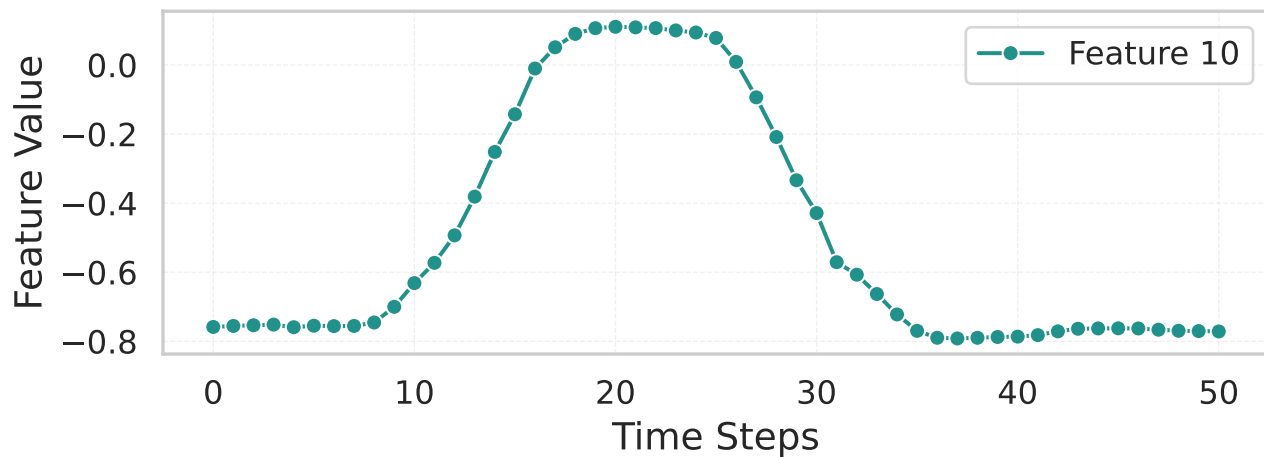

Sample Index: 33

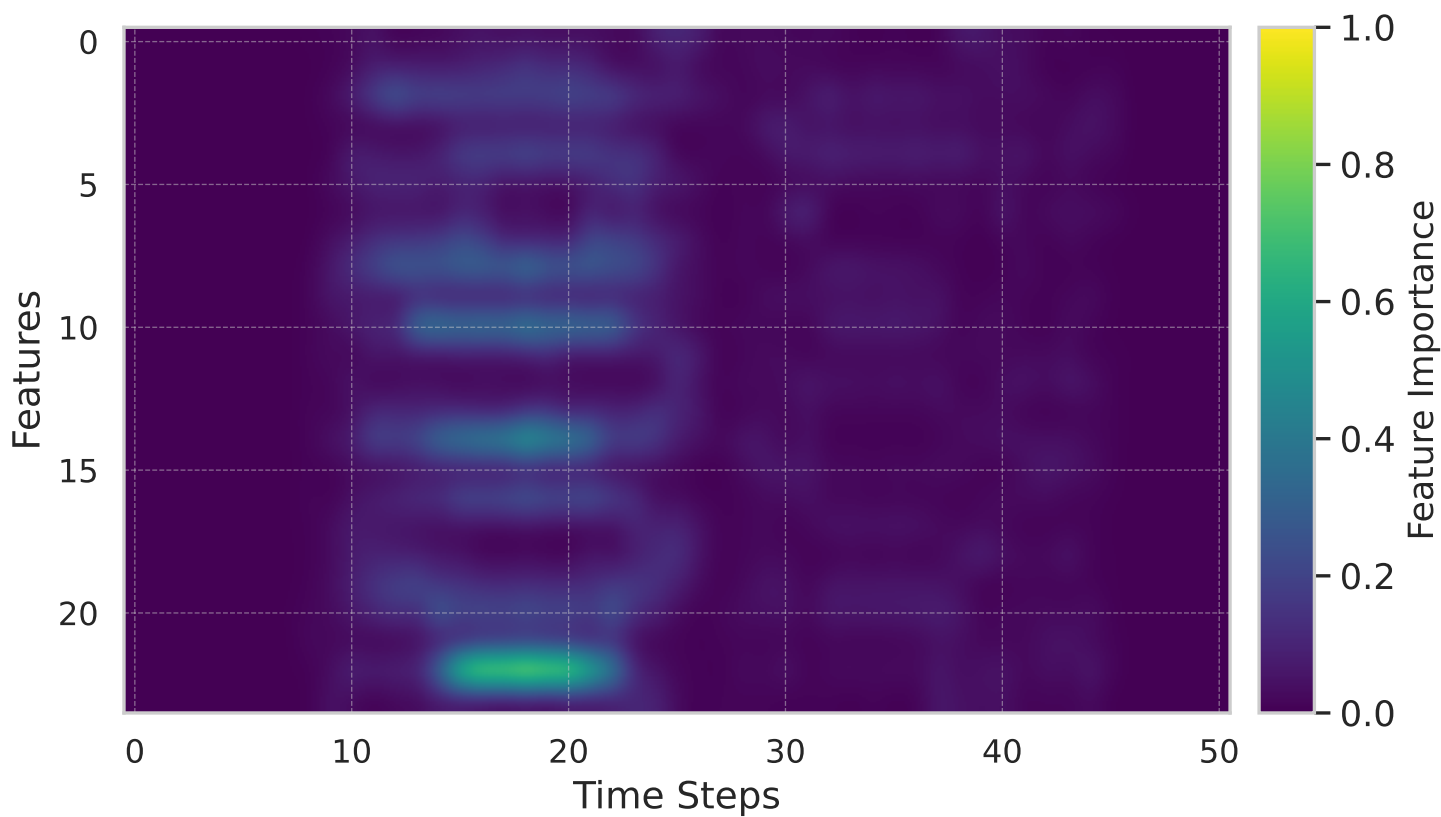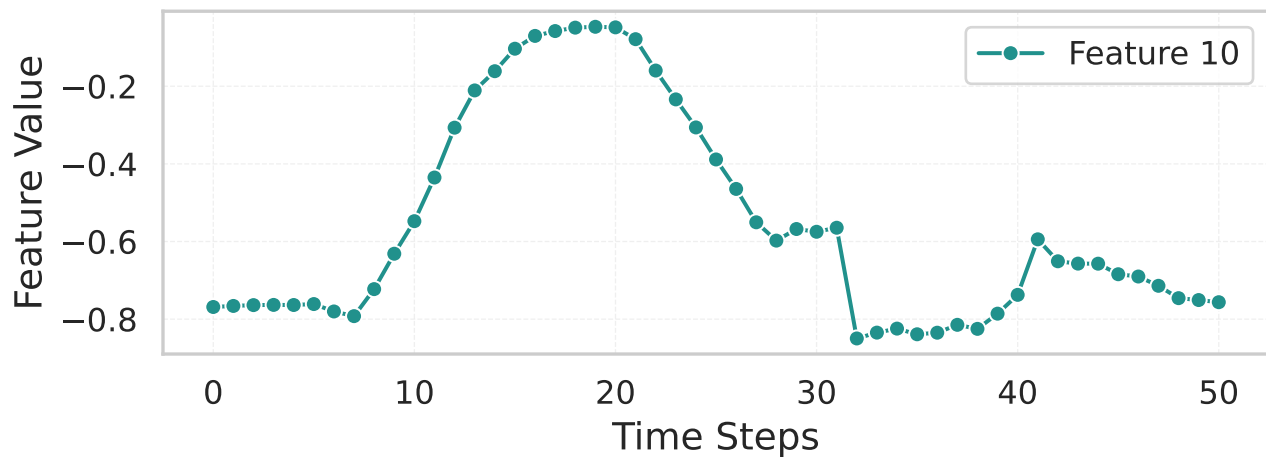

Sample Index: 34

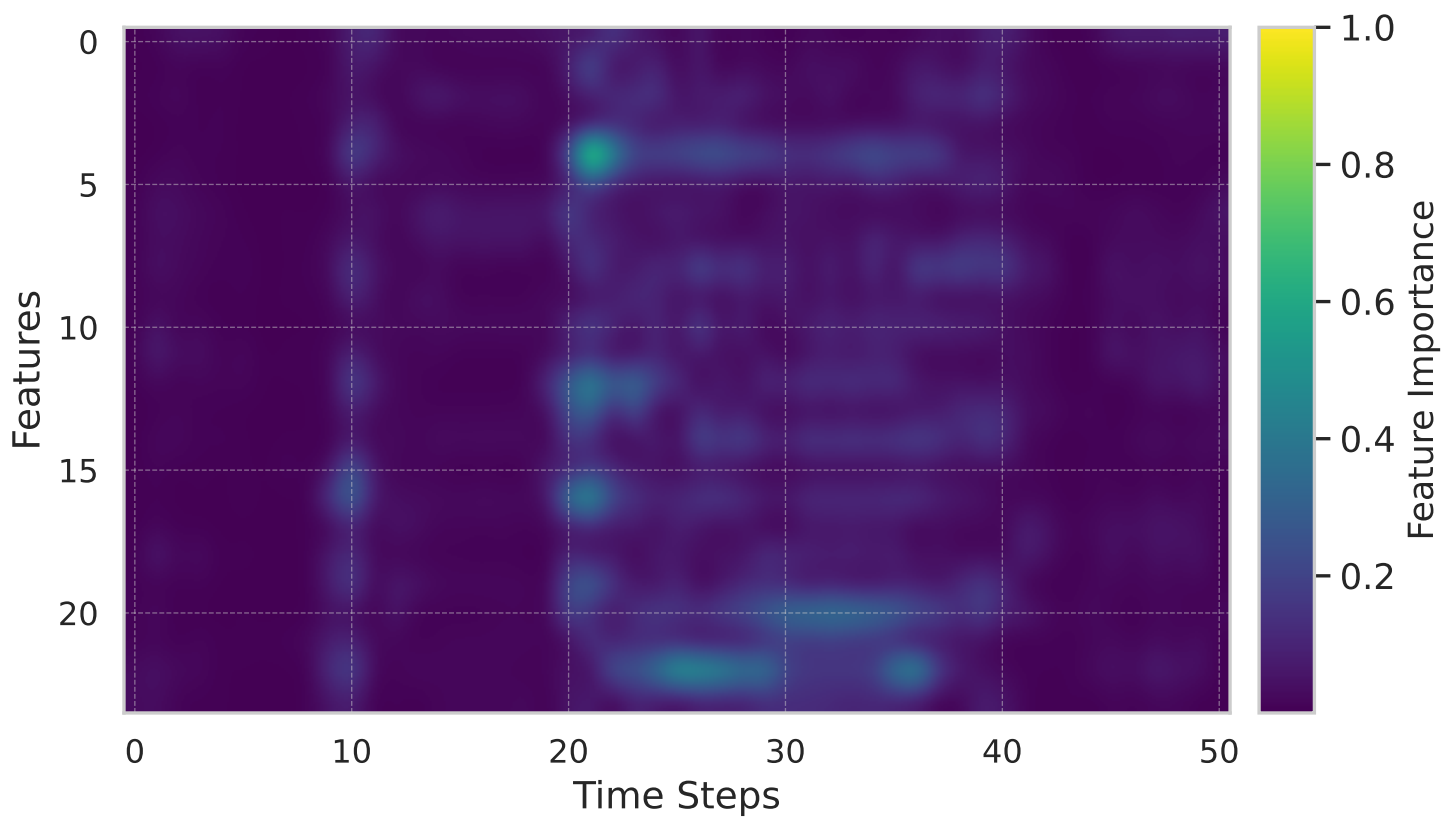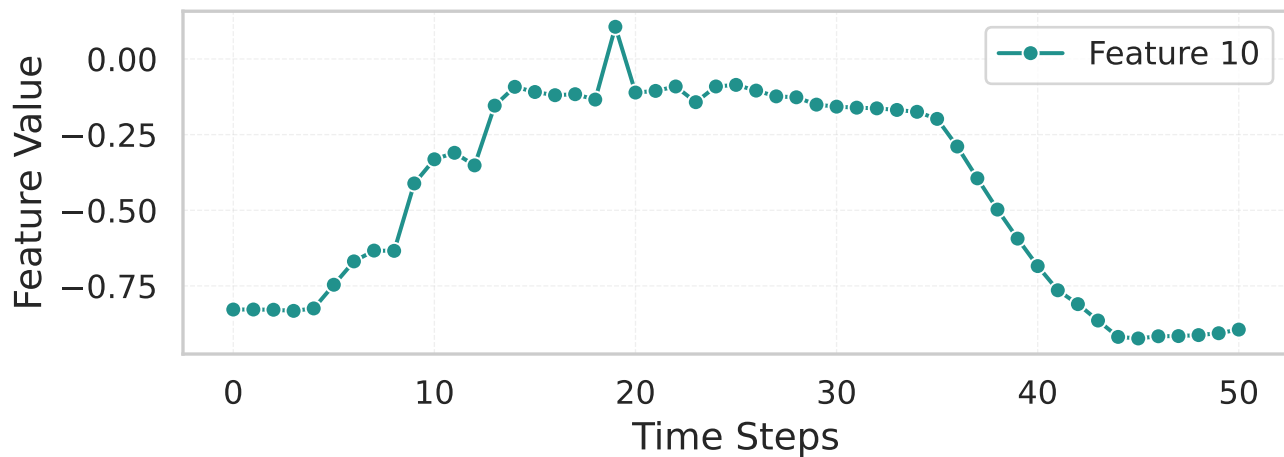

Sample Index: 35

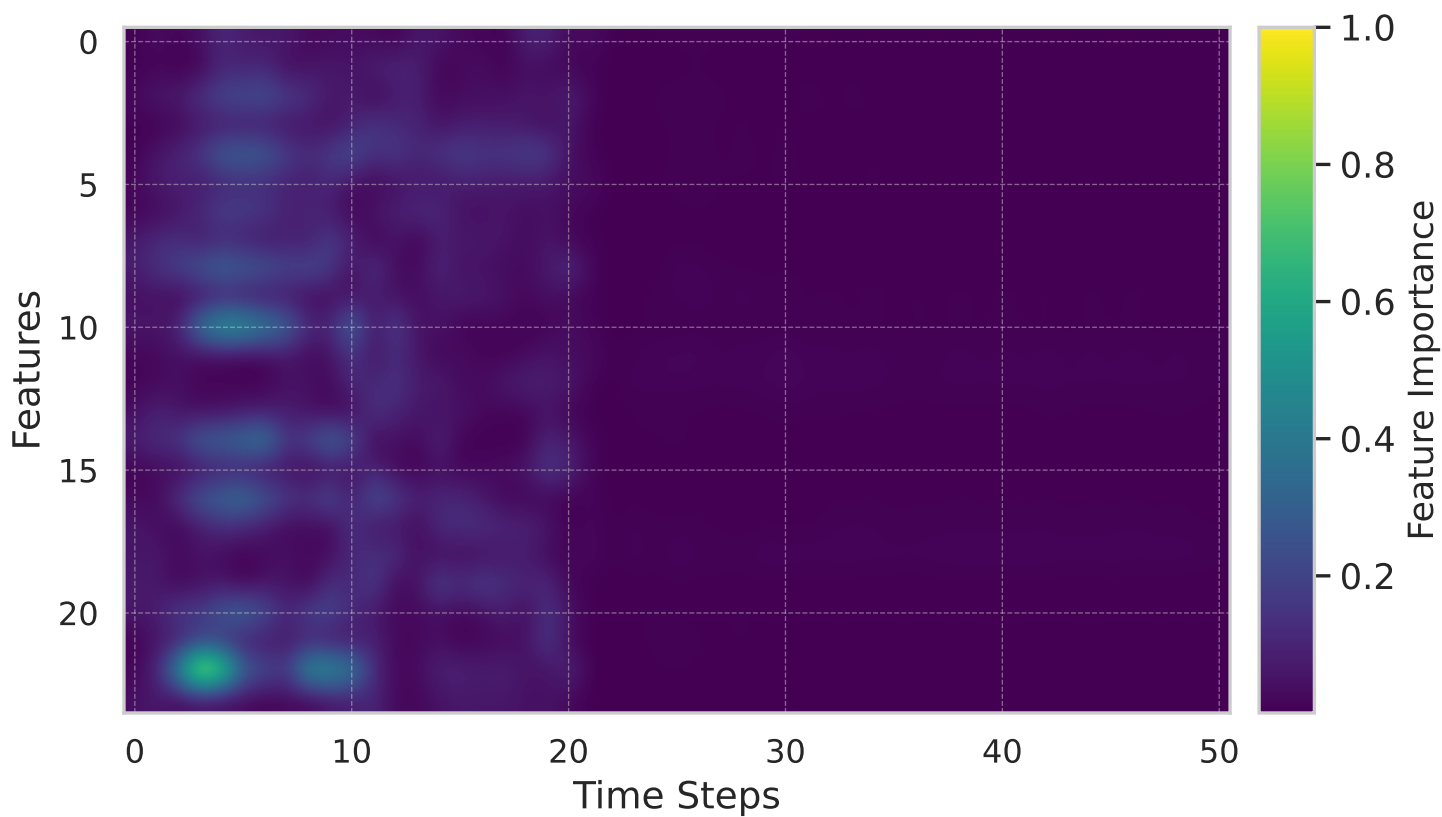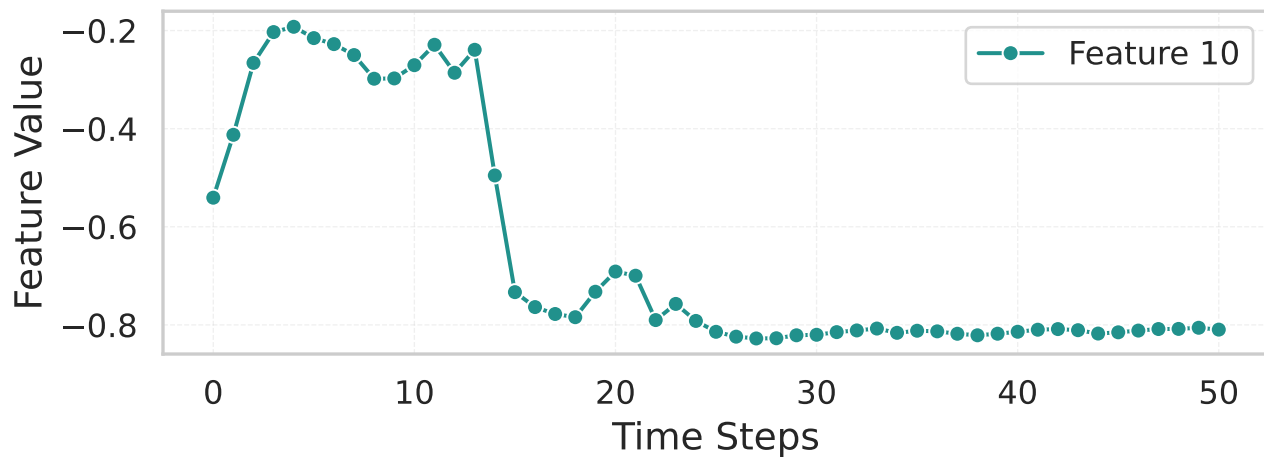



Sample Index: 36

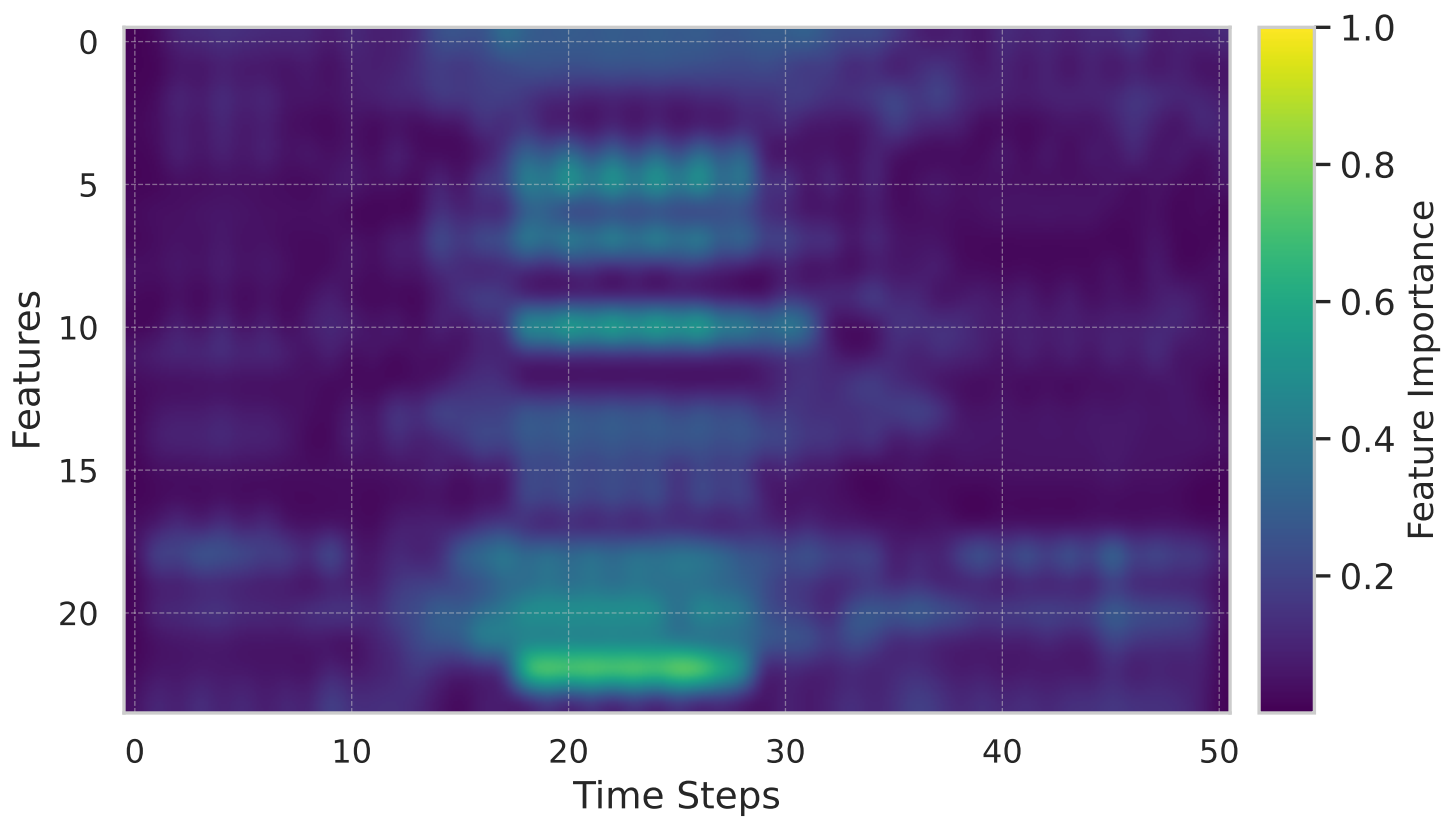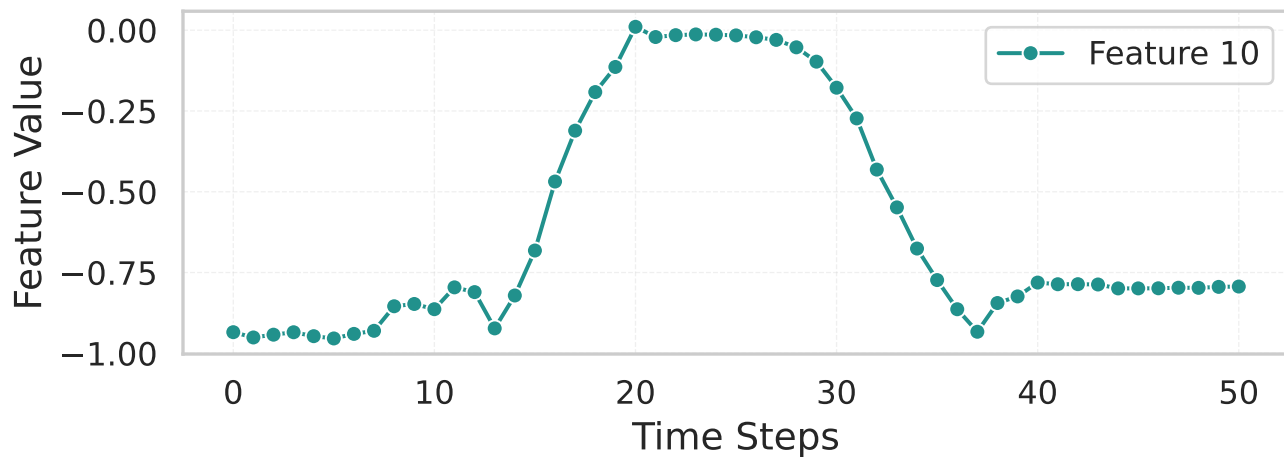

Sample Index: 37

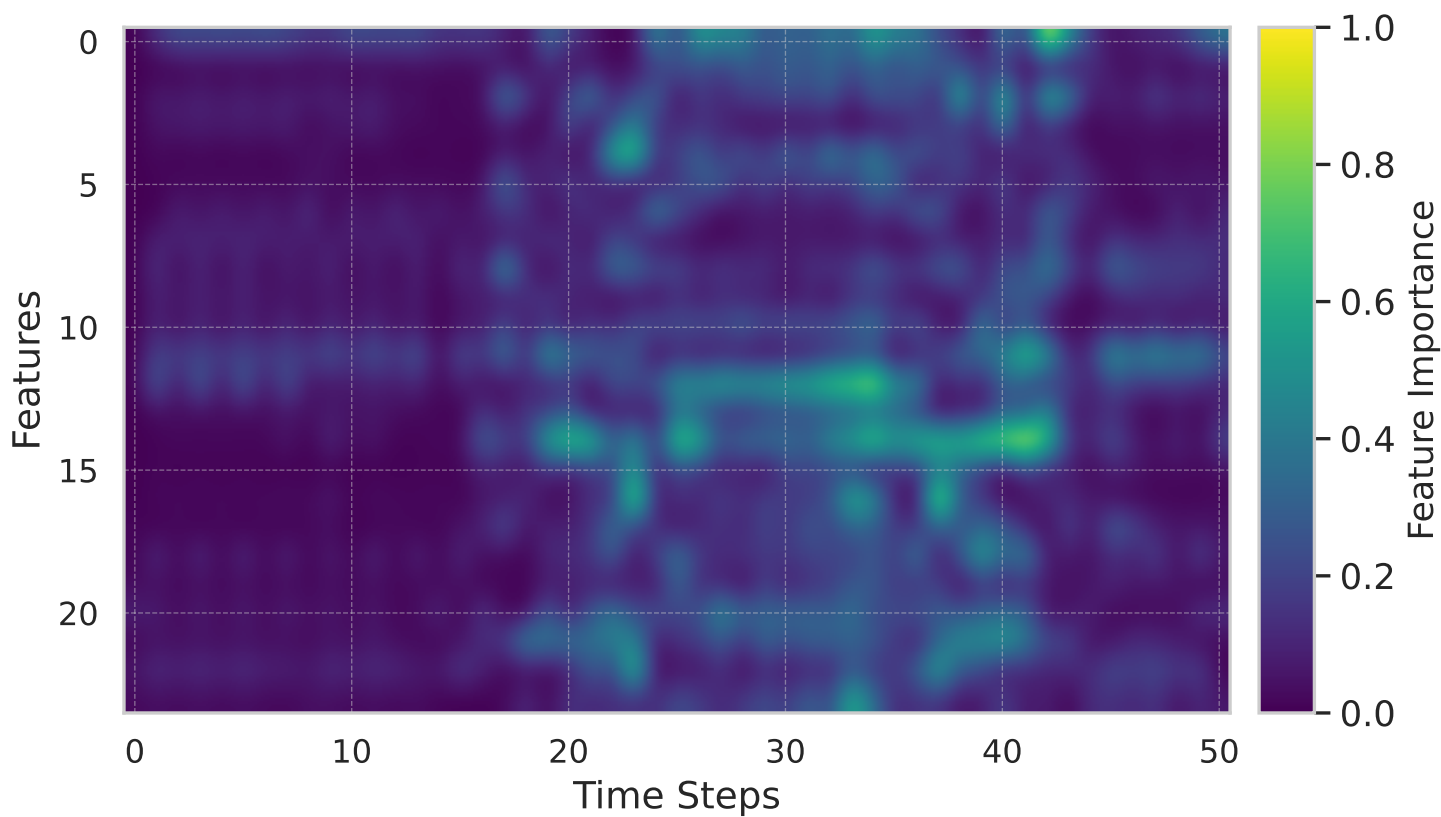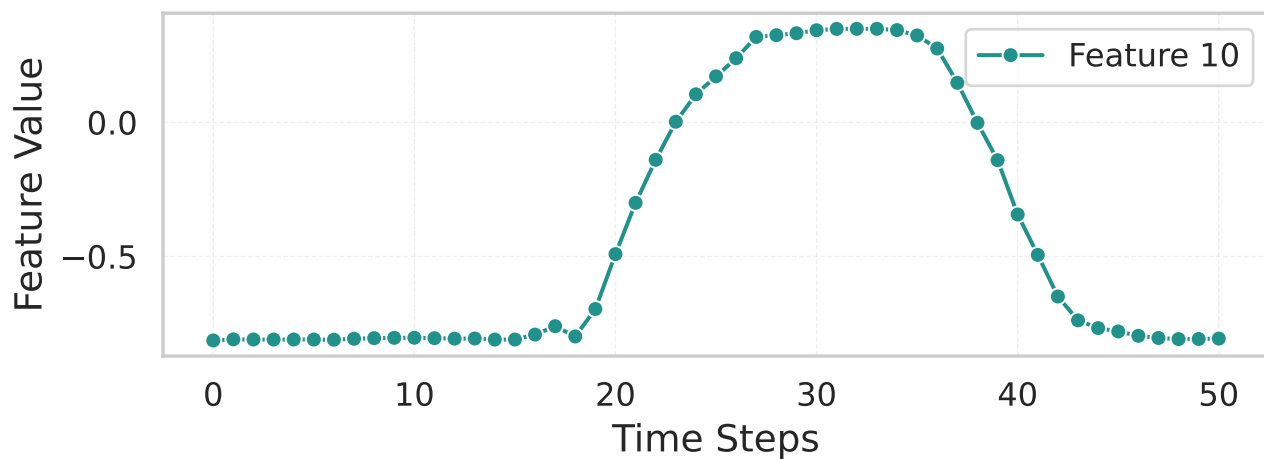

Sample Index: 38

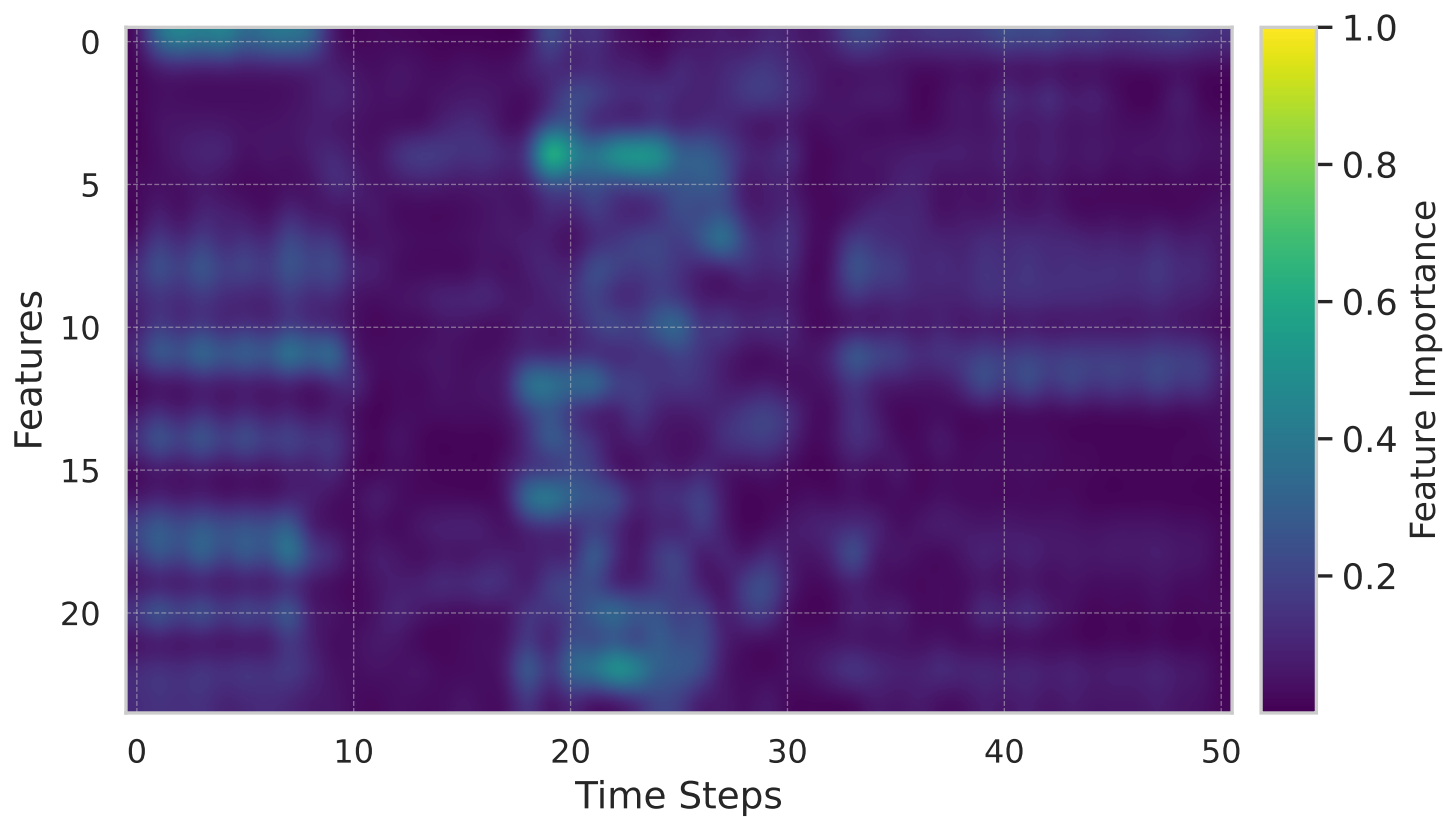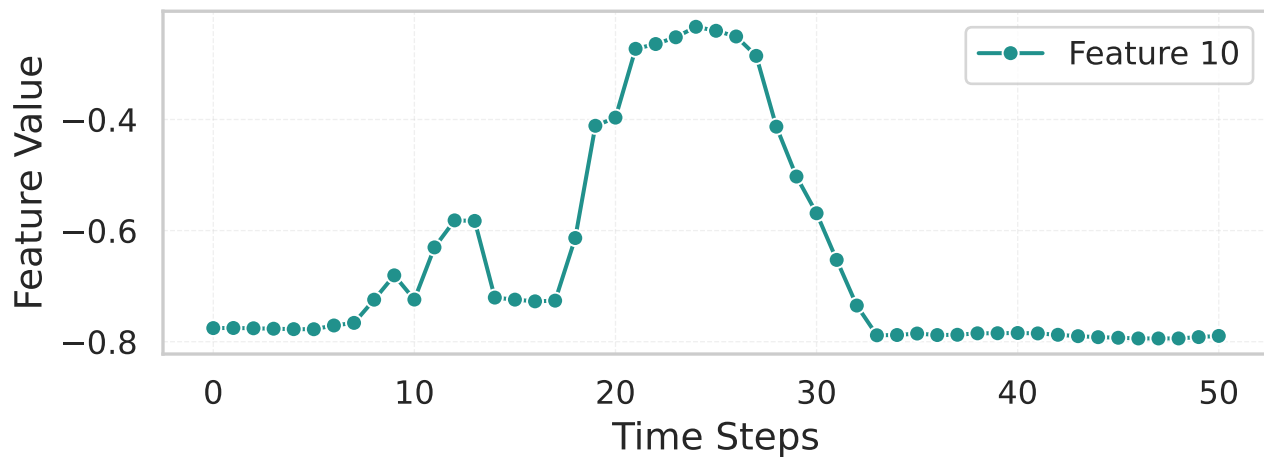

Sample Index: 39

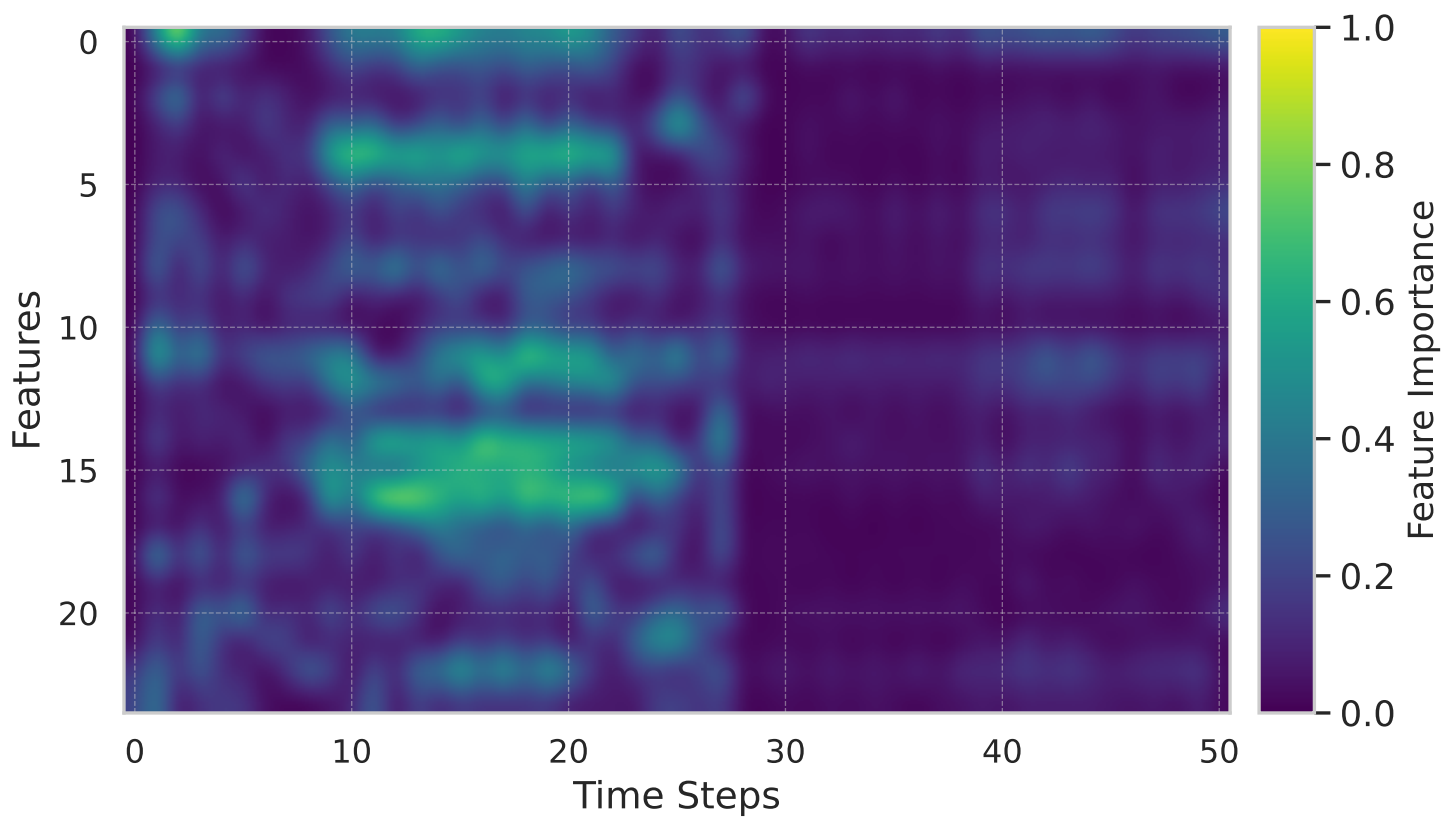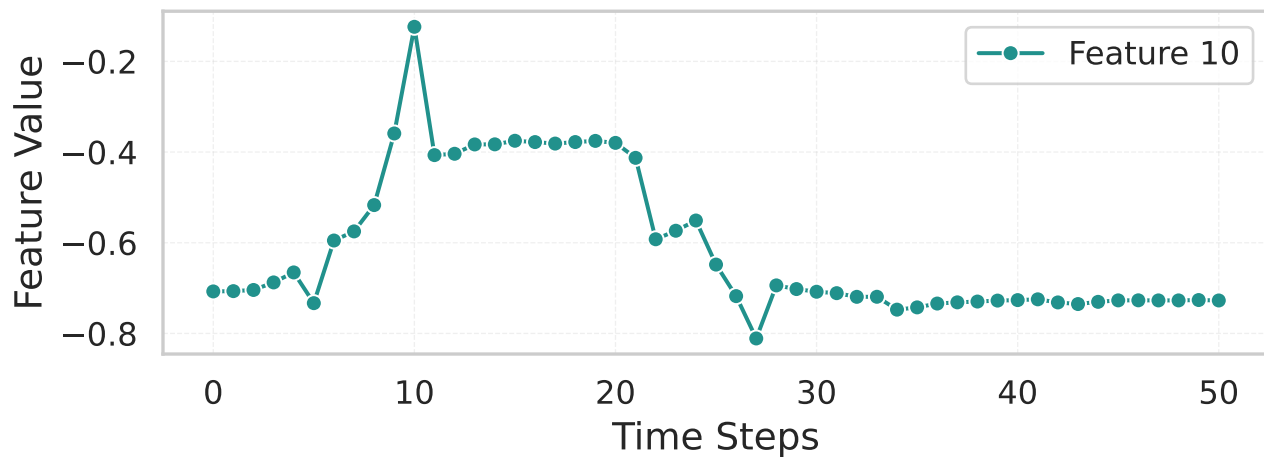

Sample Index: 40

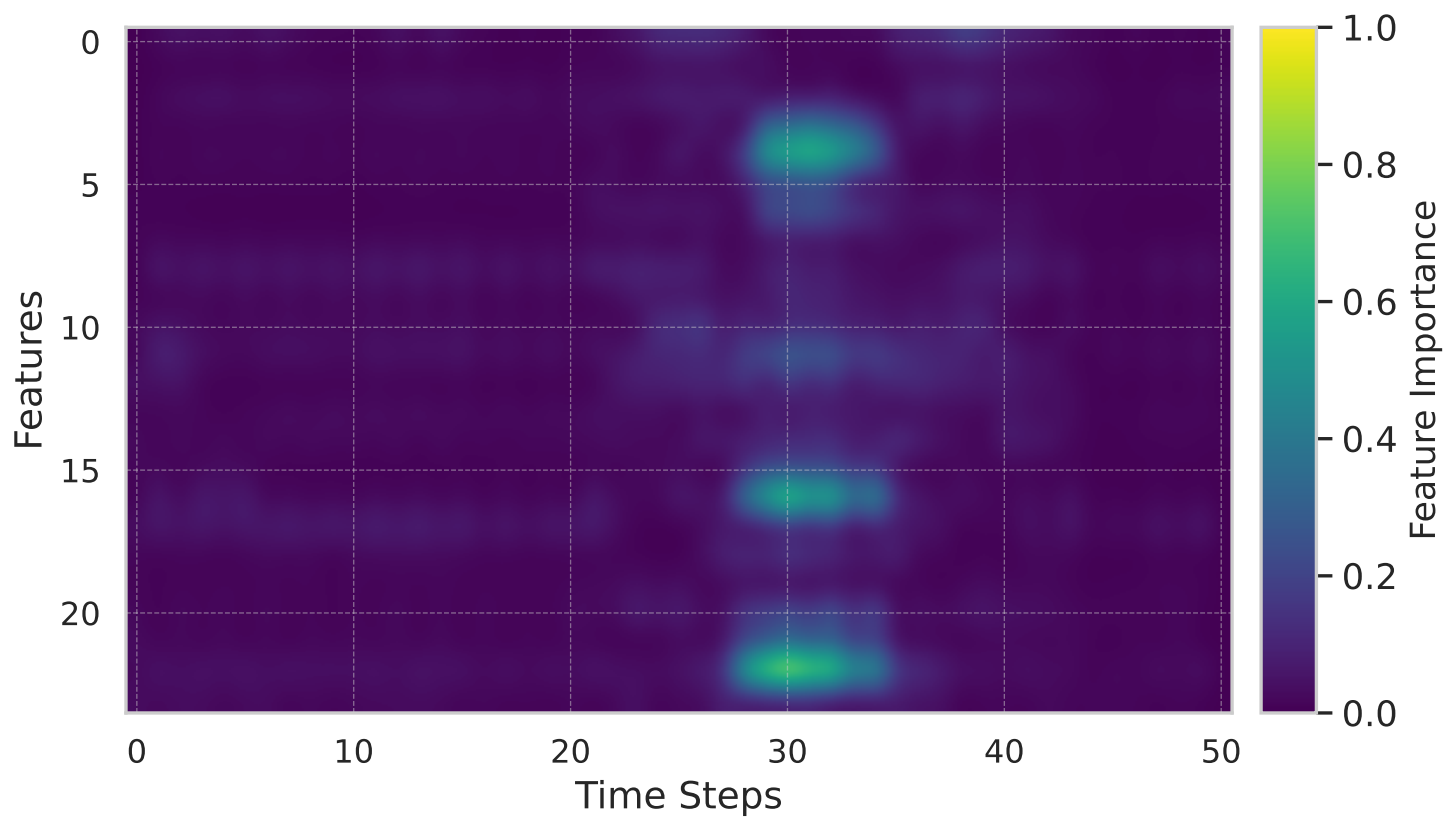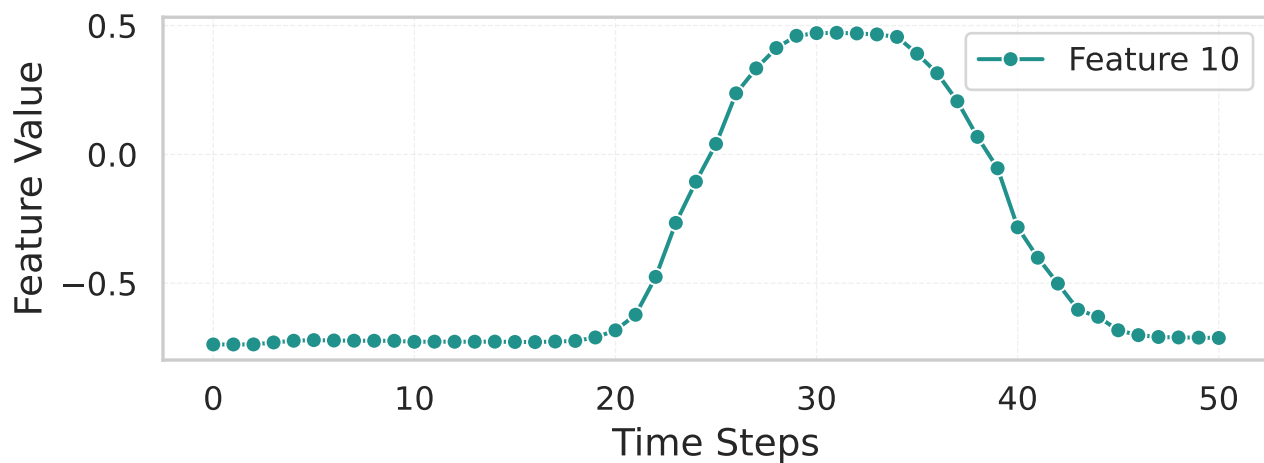

Sample Index: 41

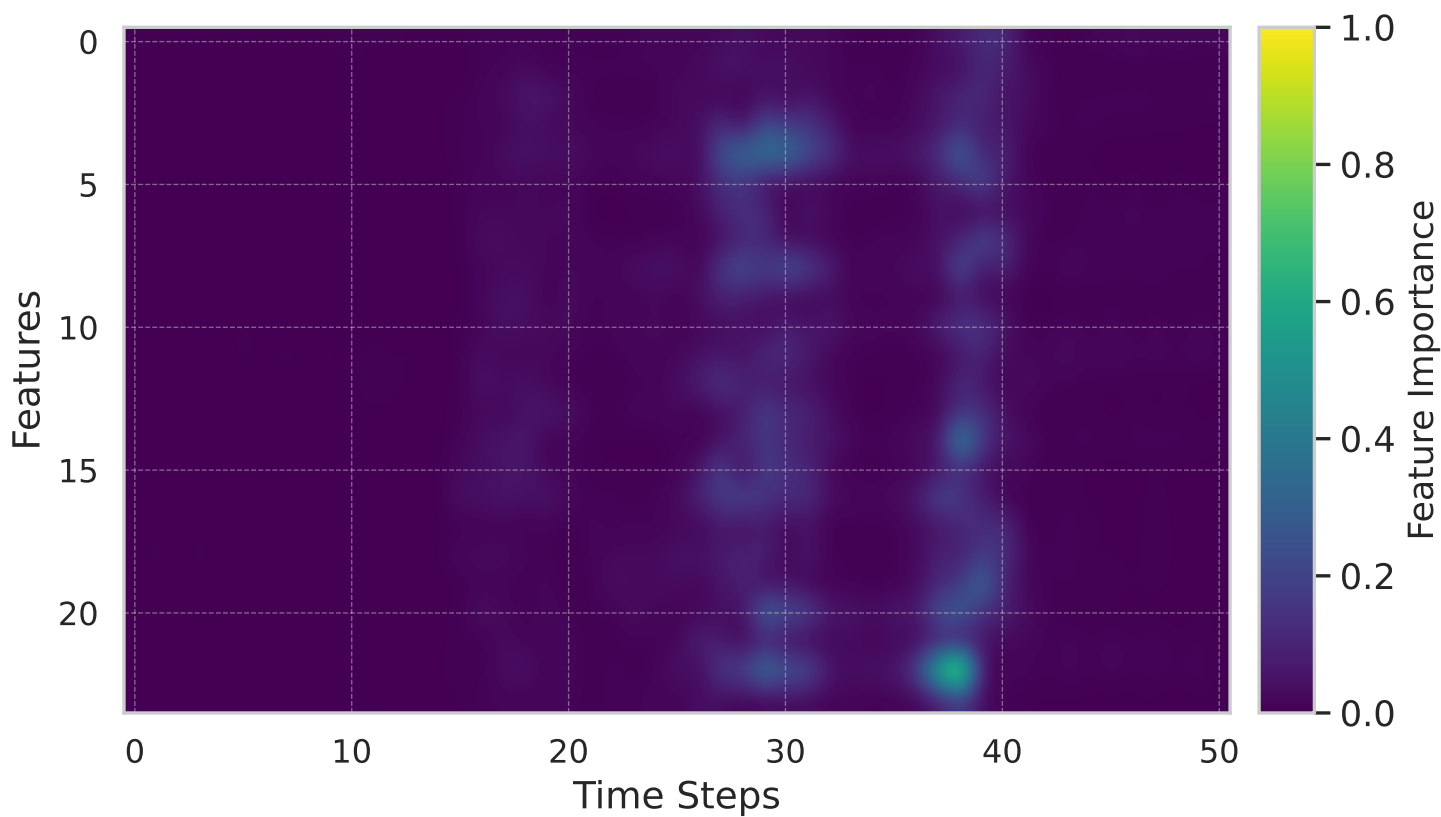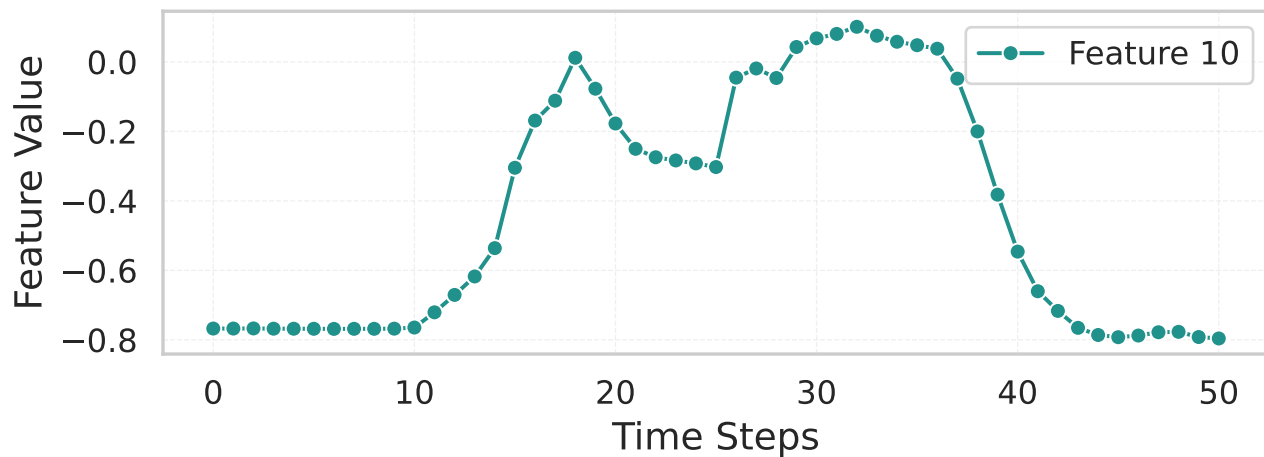

Sample Index: 42

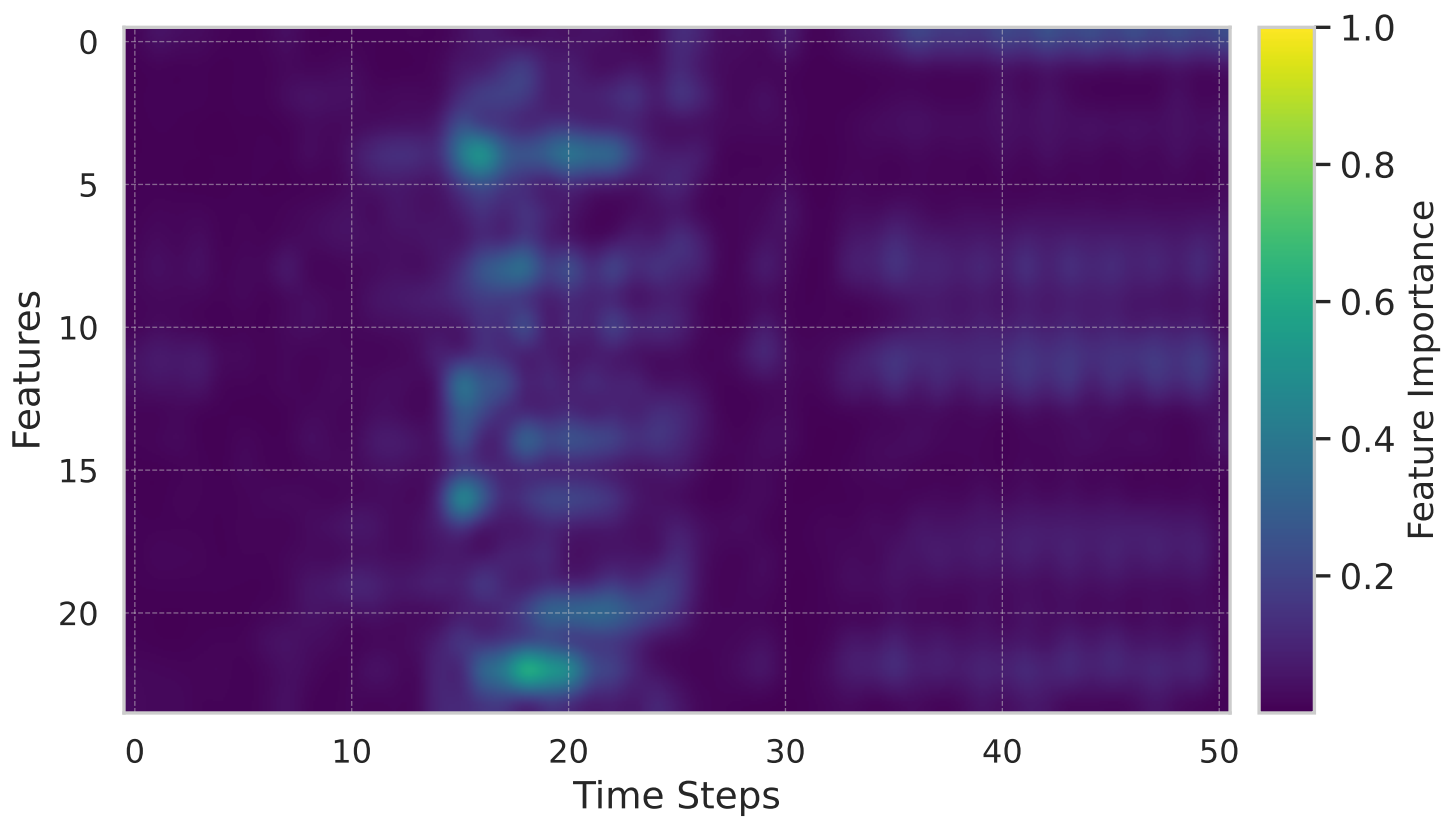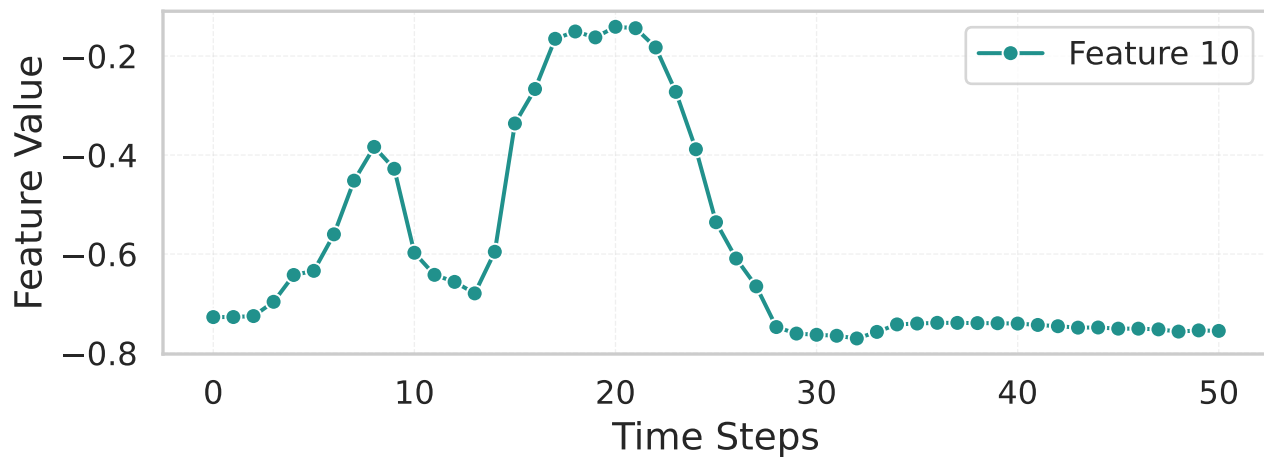

Sample Index: 43

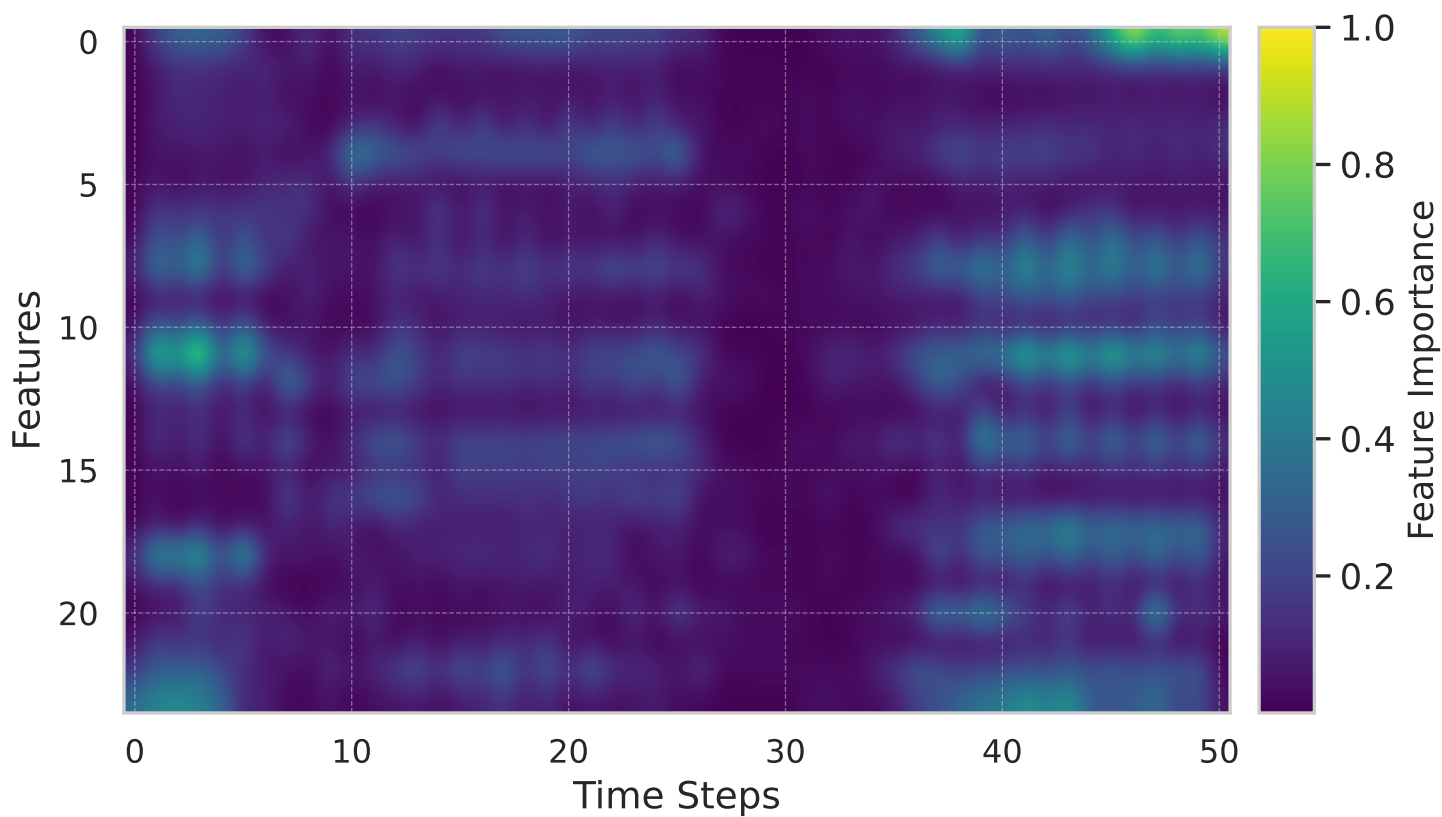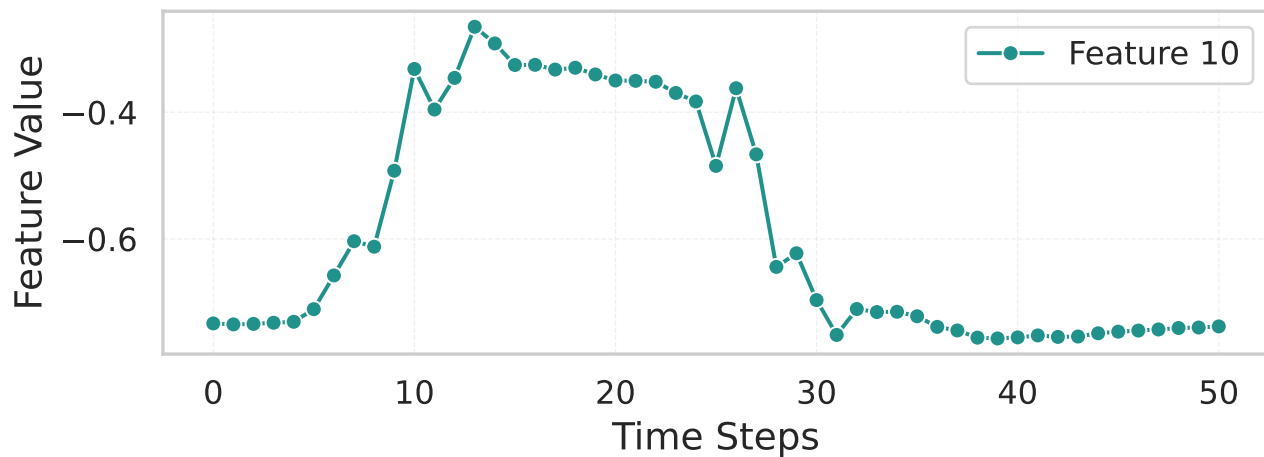



Sample Index: 44

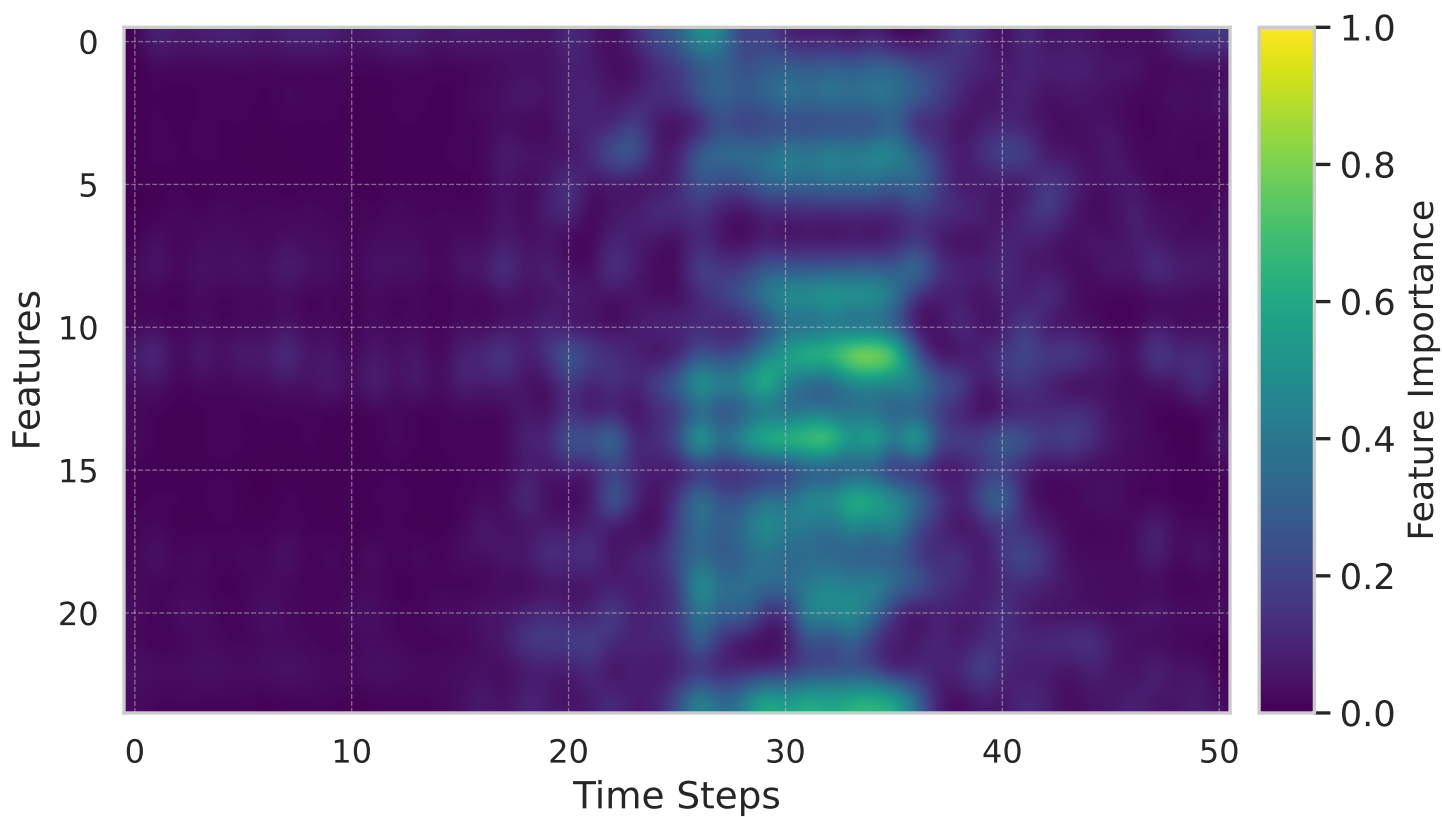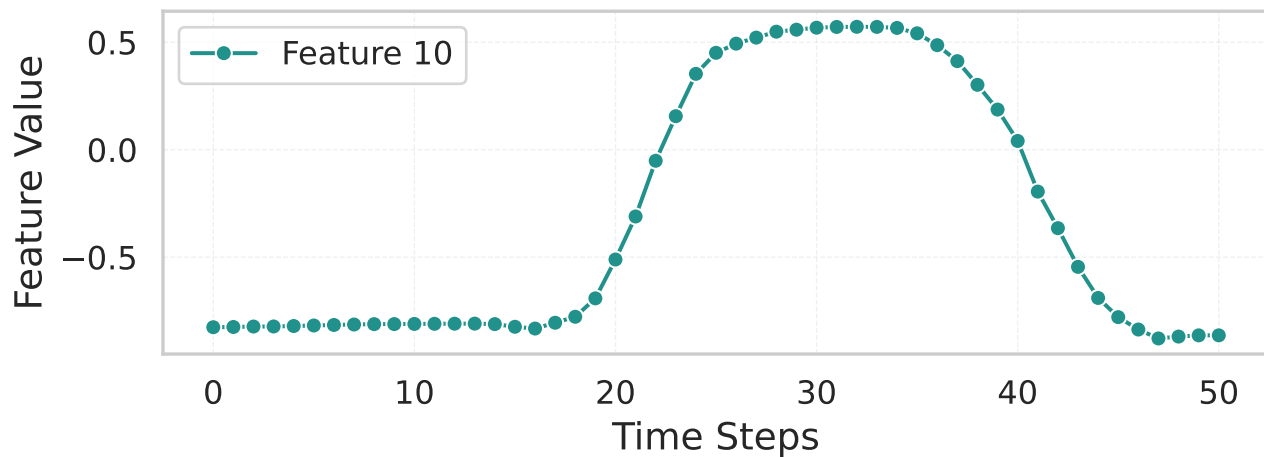

Sample Index: 45

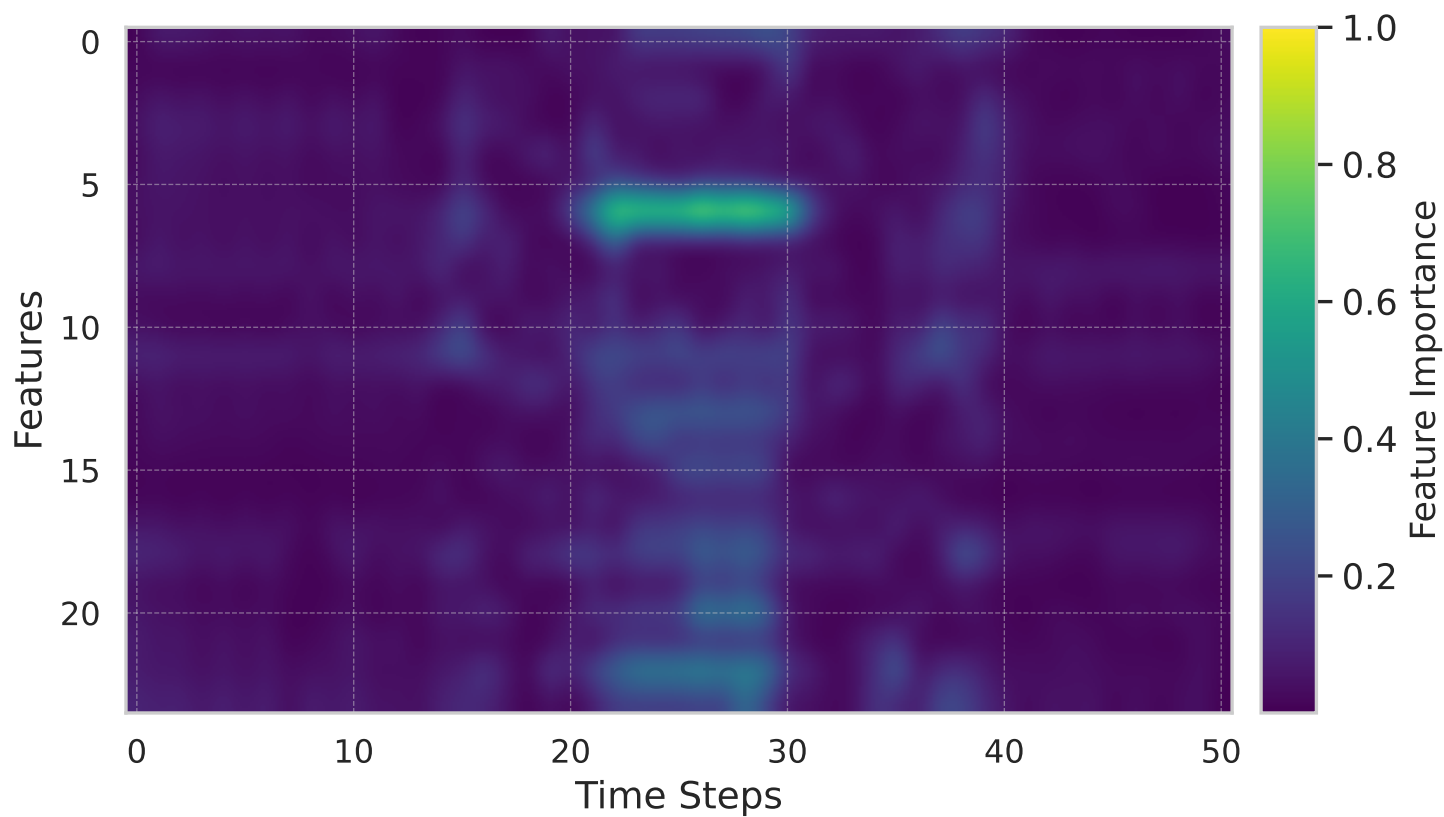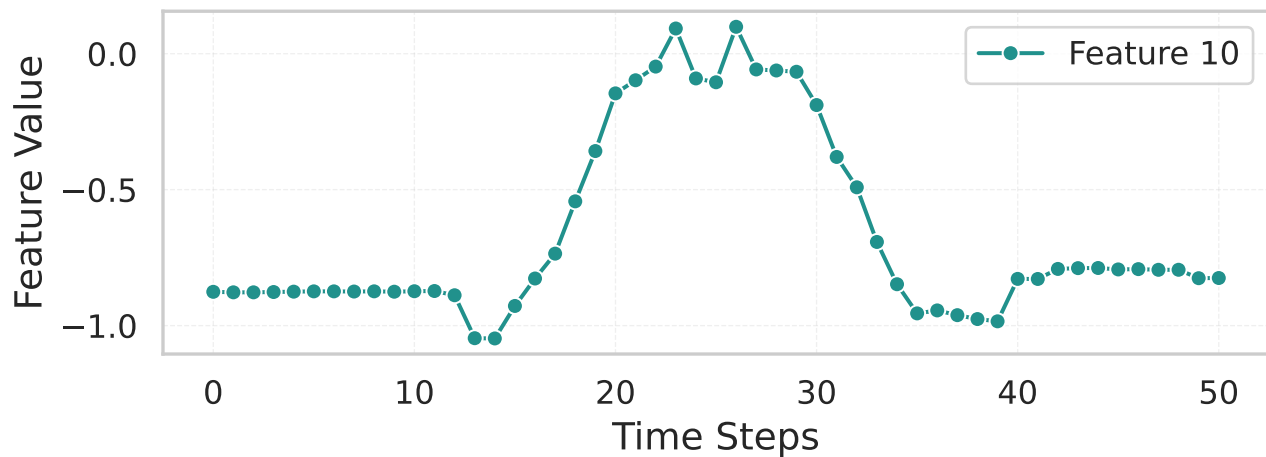

Sample Index: 46

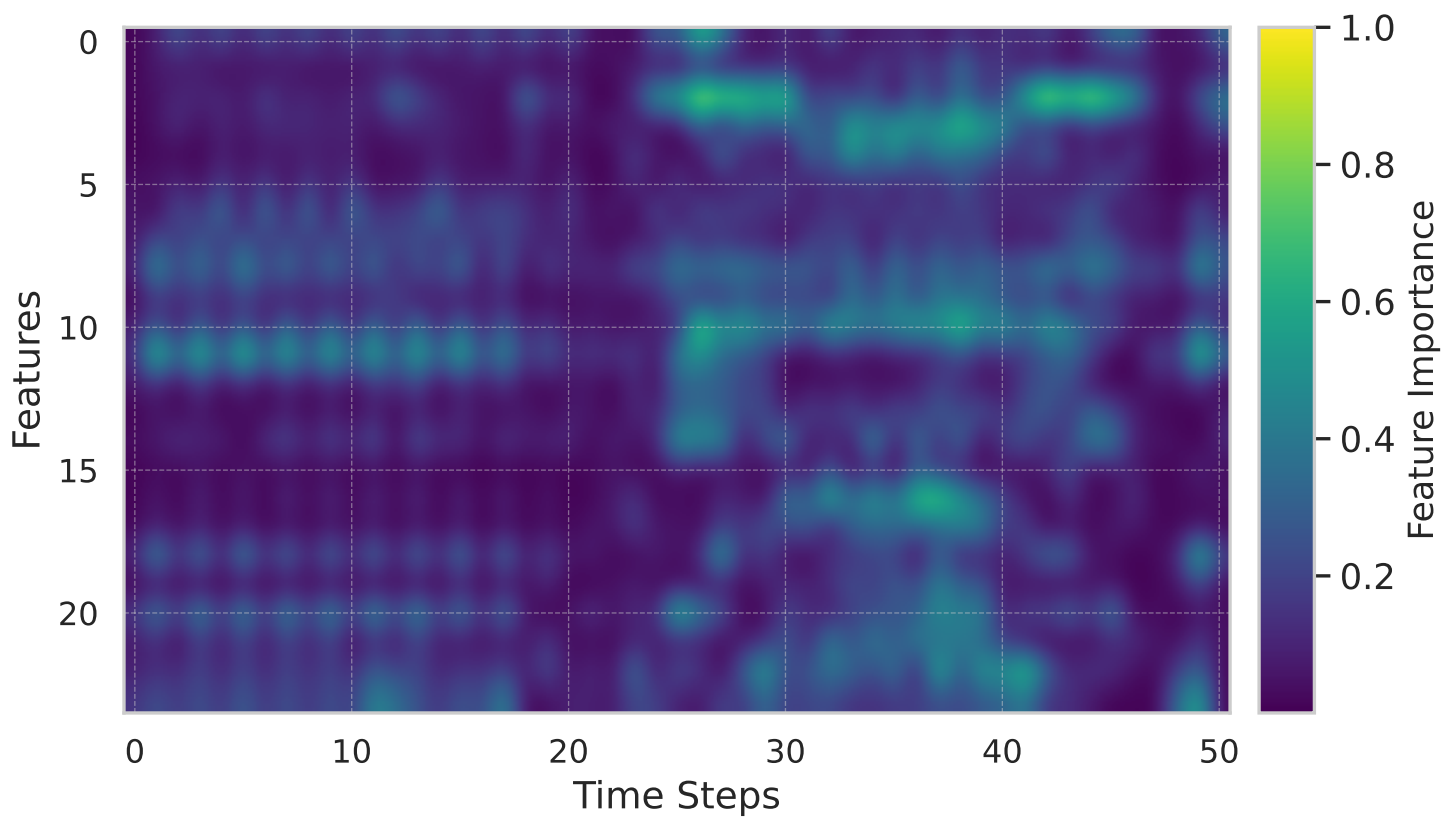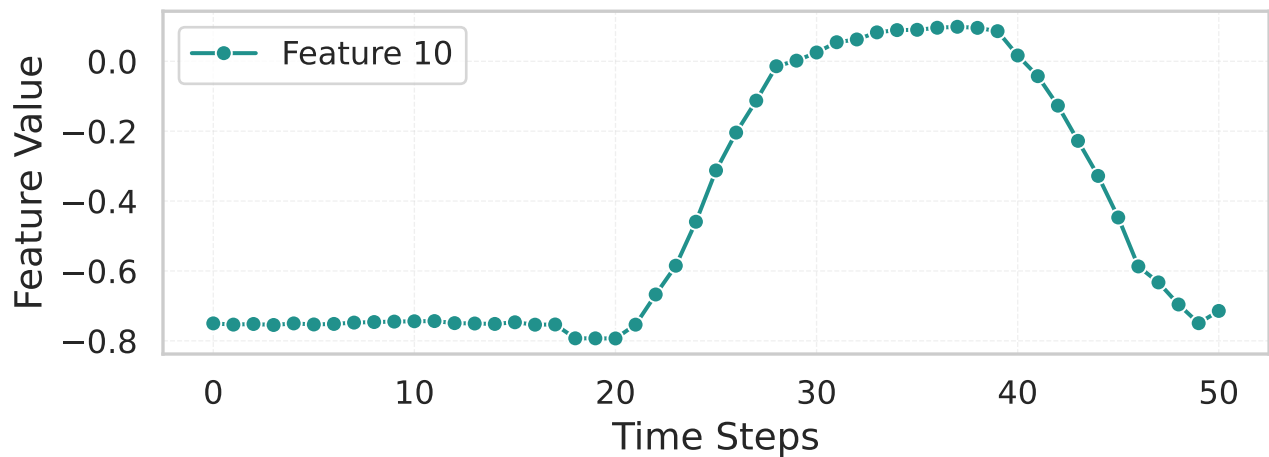

Sample Index: 47

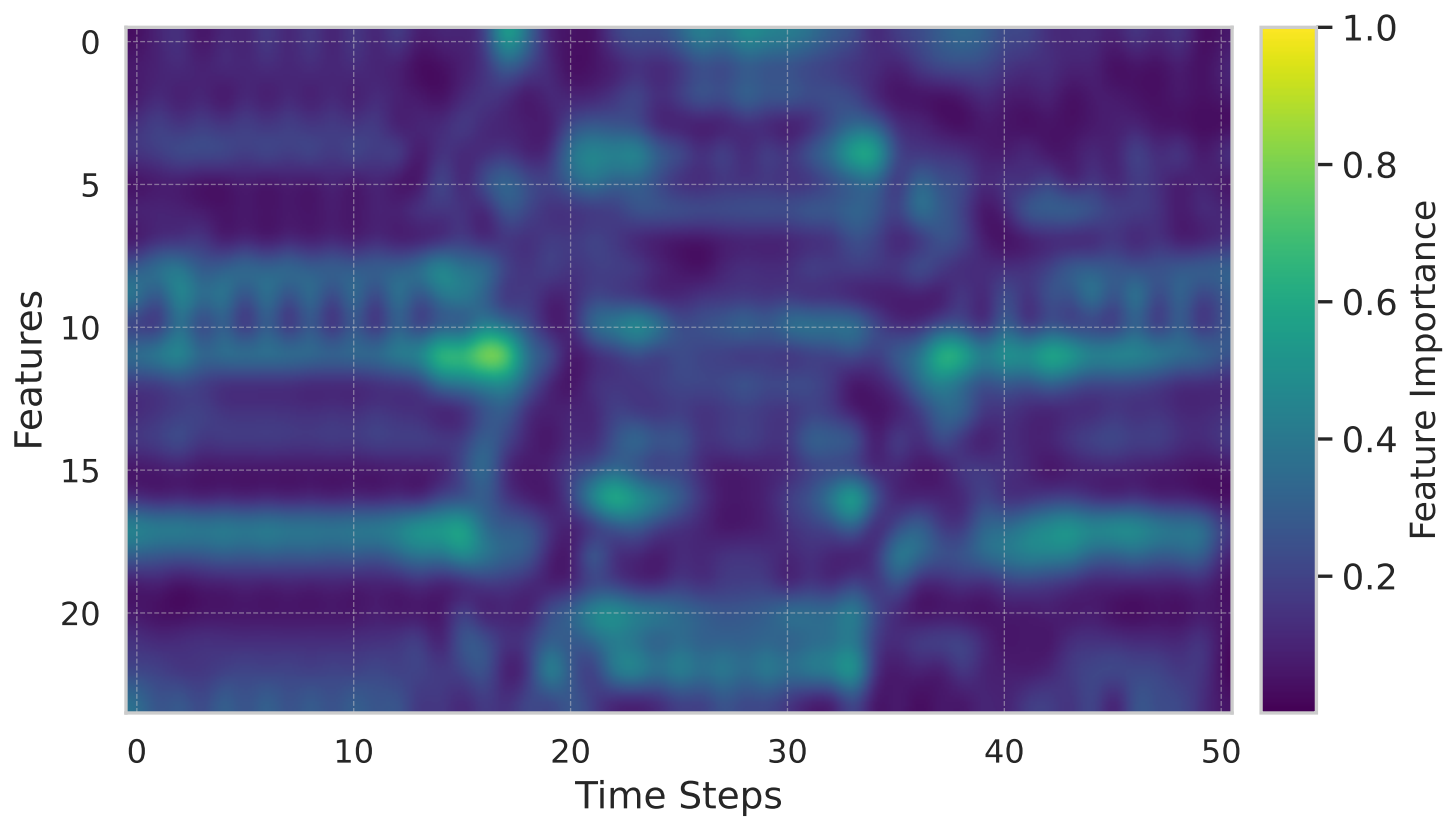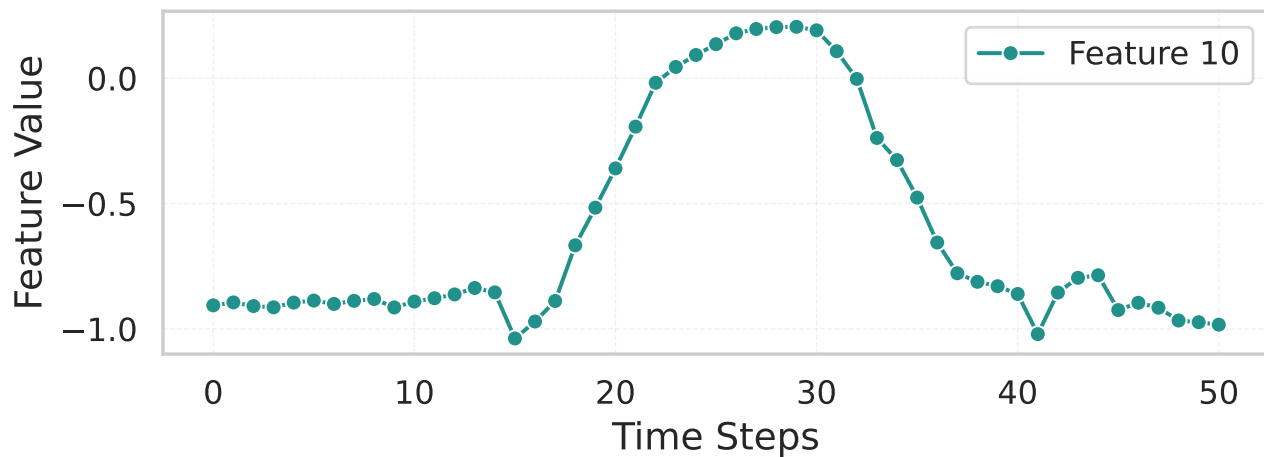

Sample Index: 48

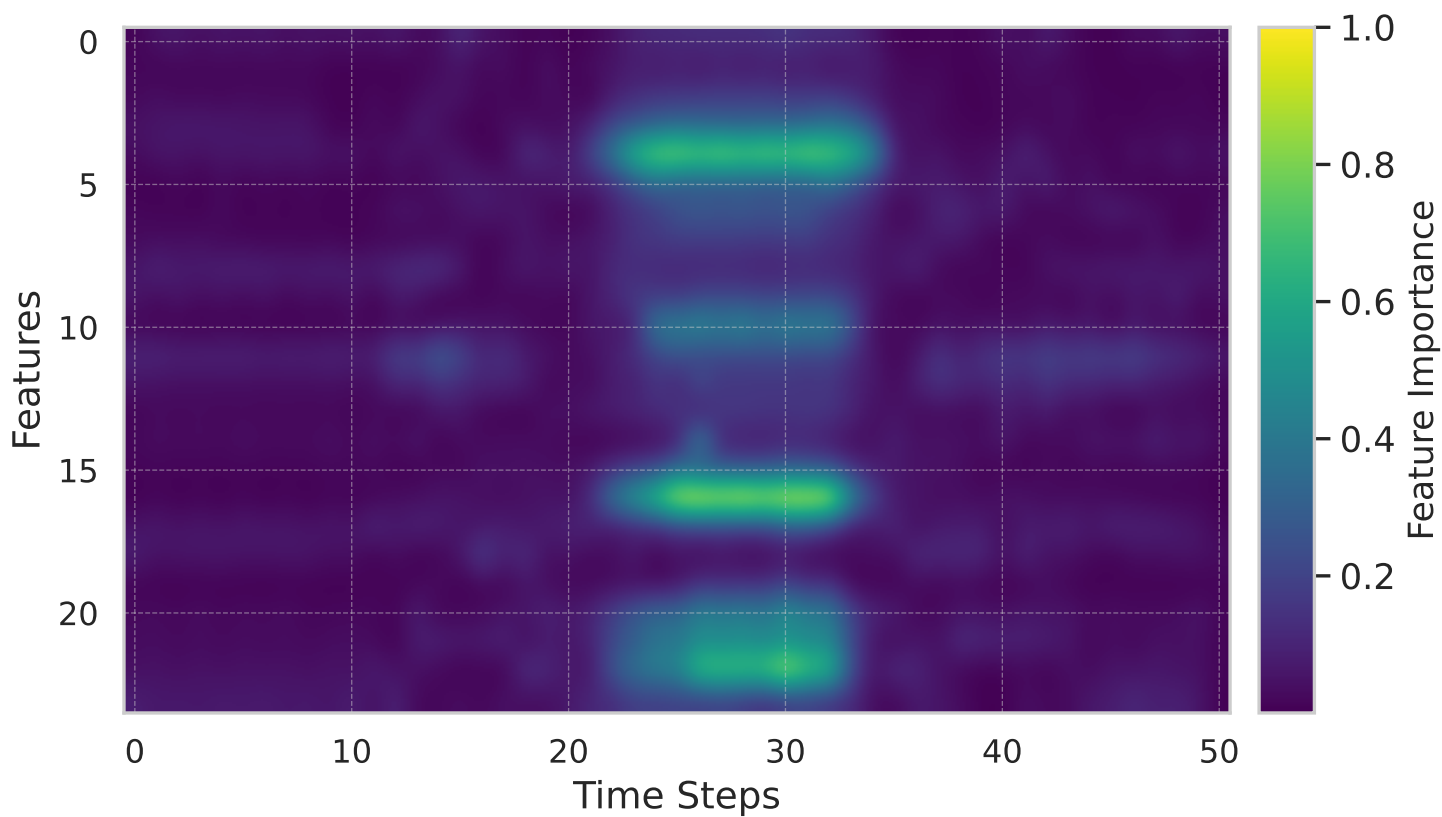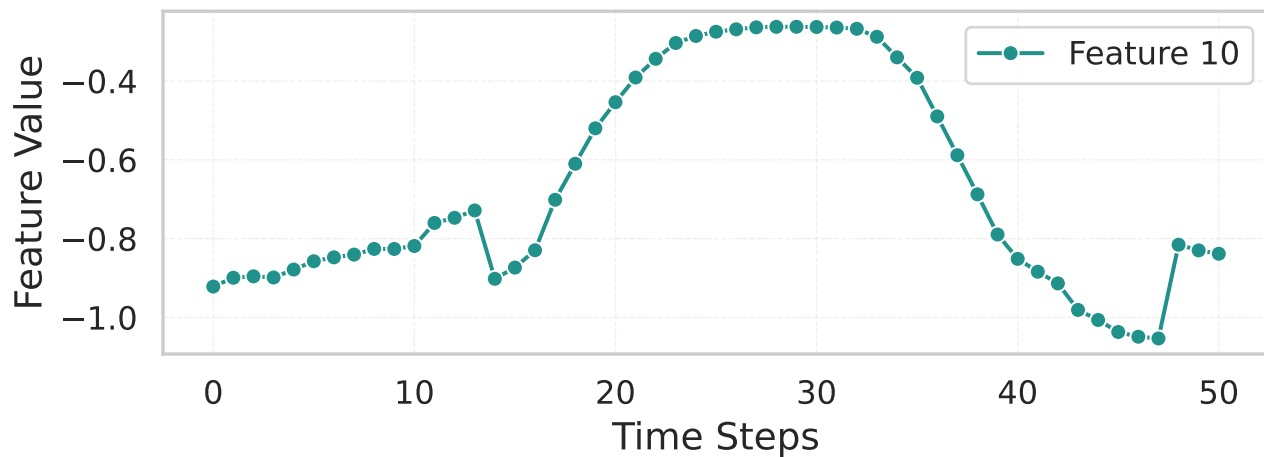

Sample Index: 49

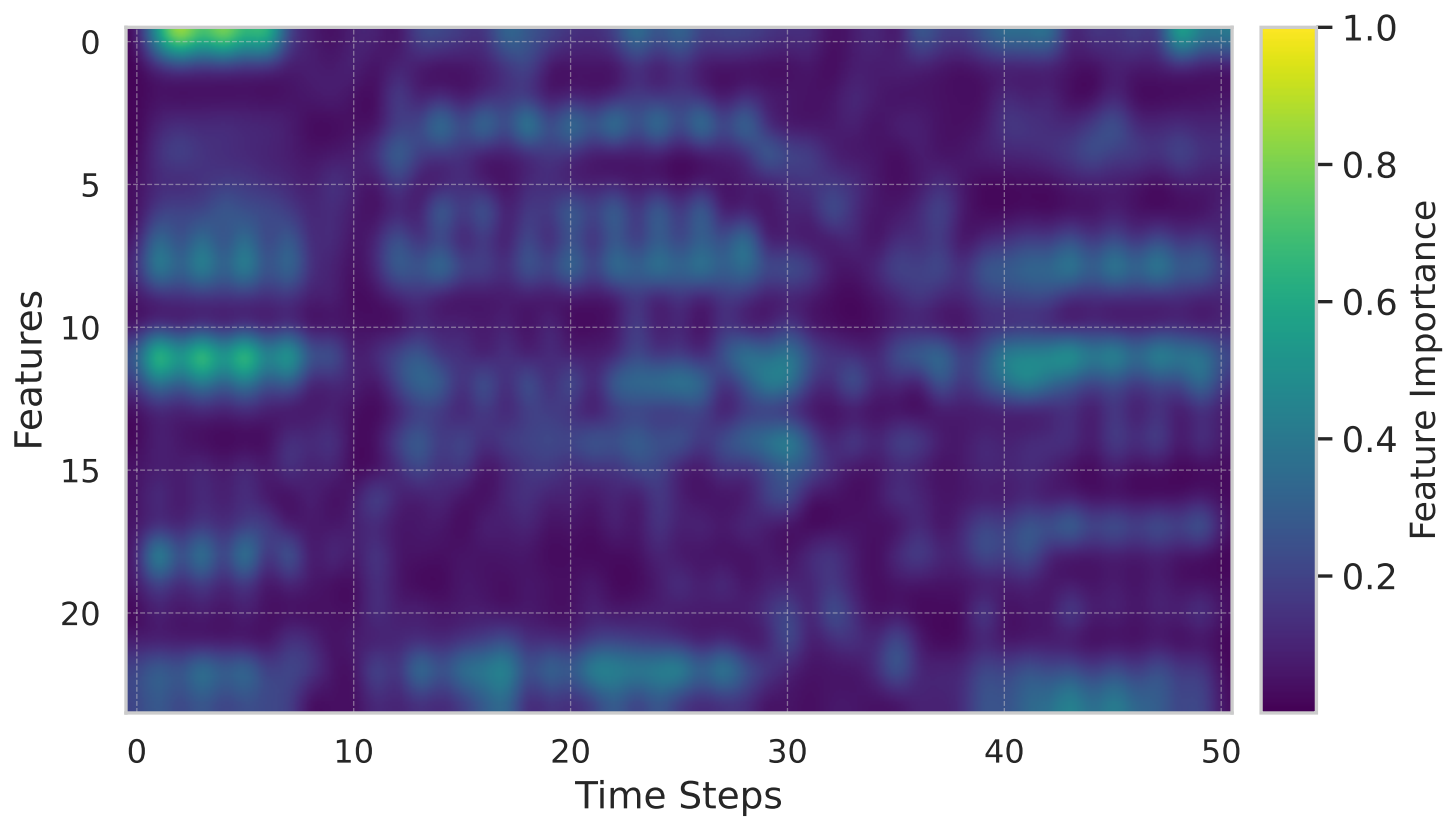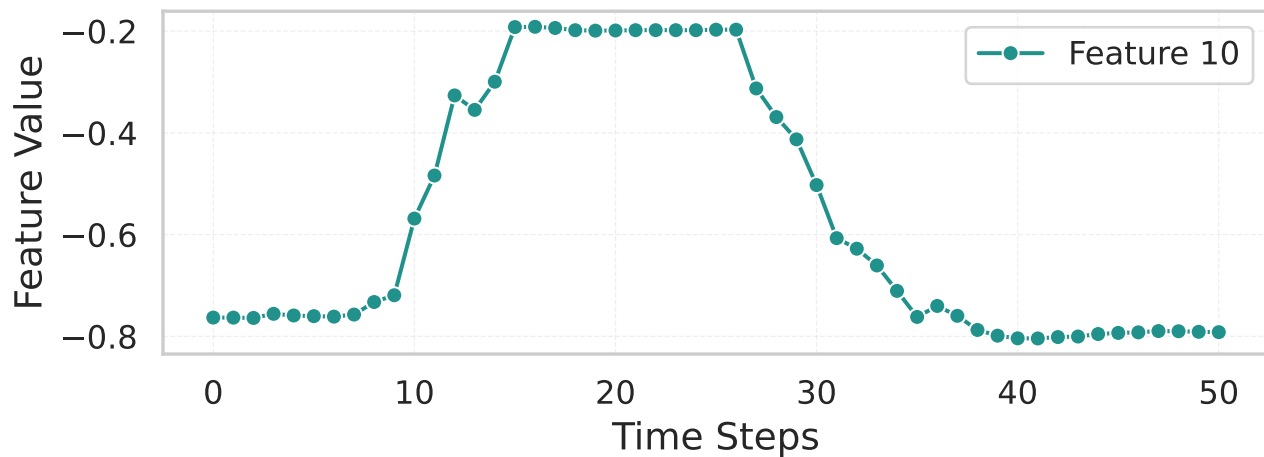

Sample Index: 50

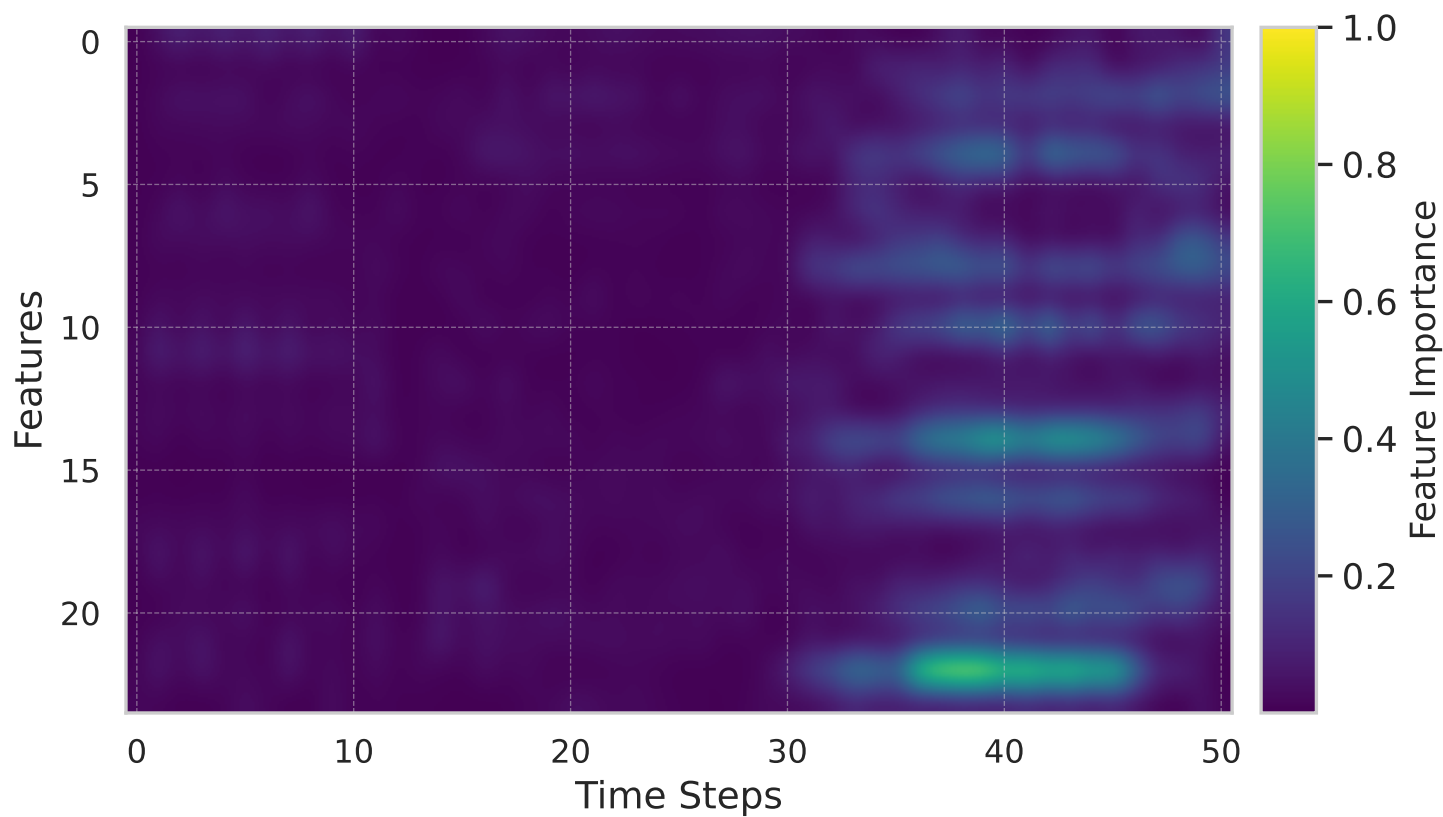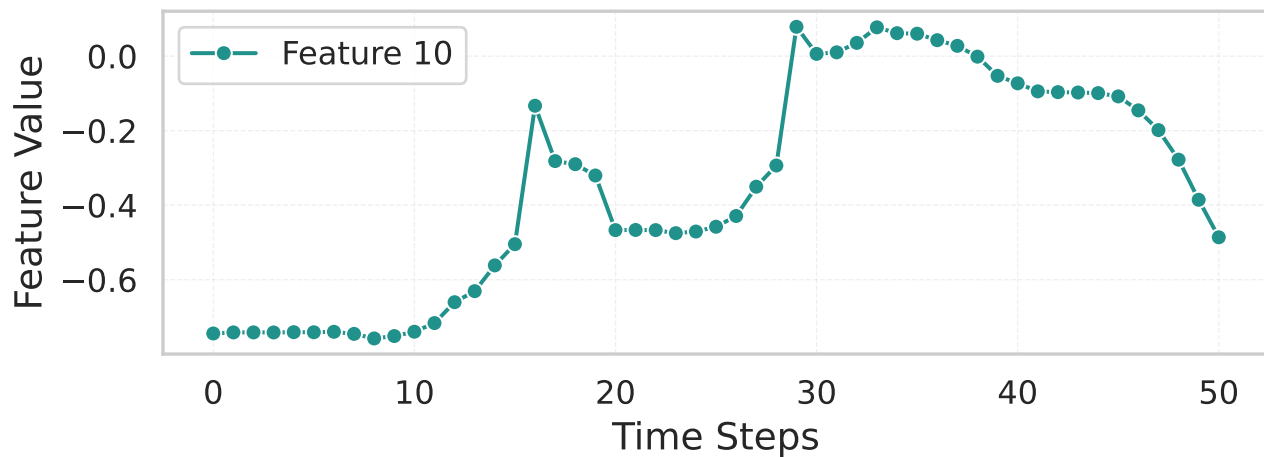

Sample Index: 51

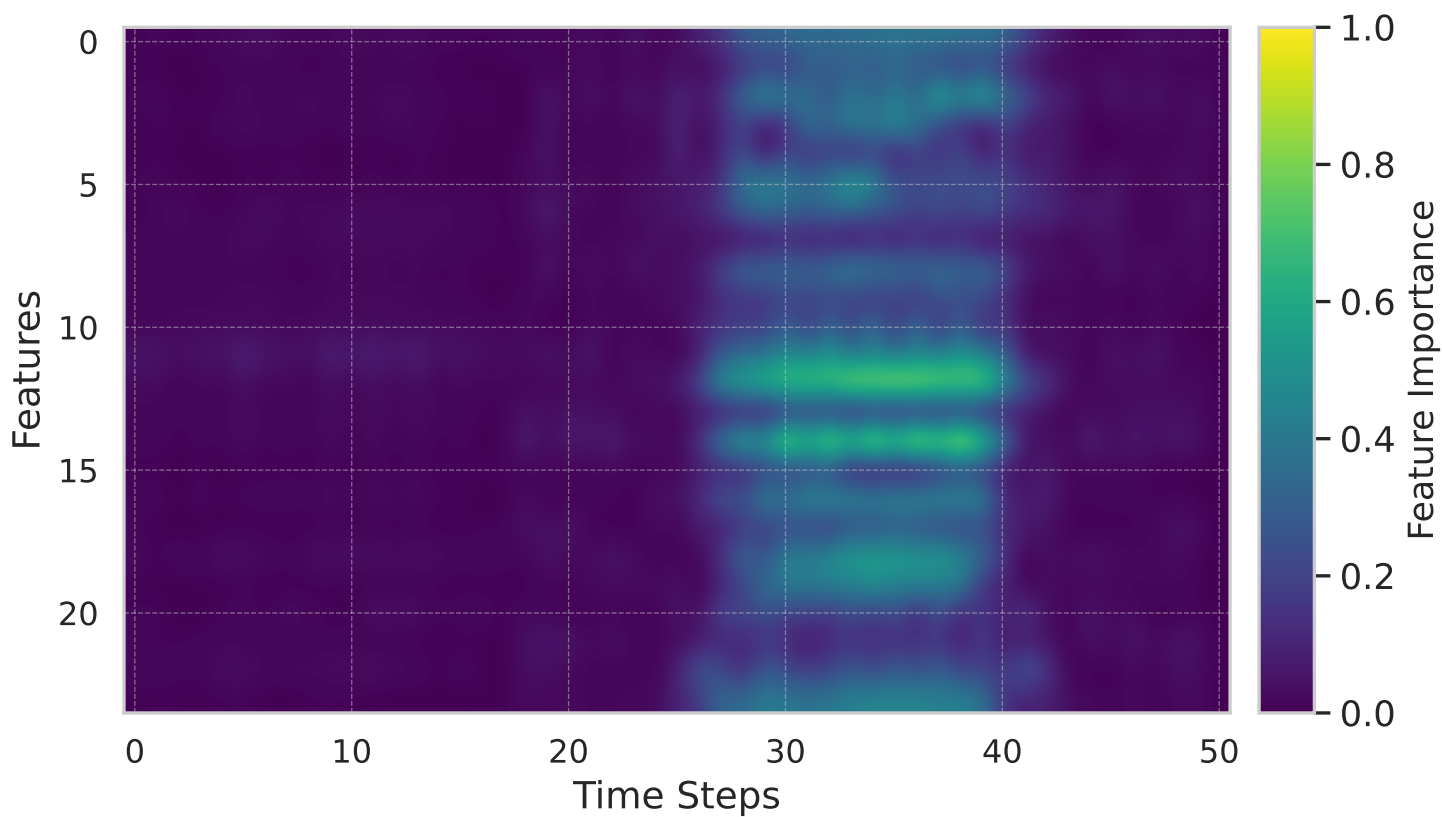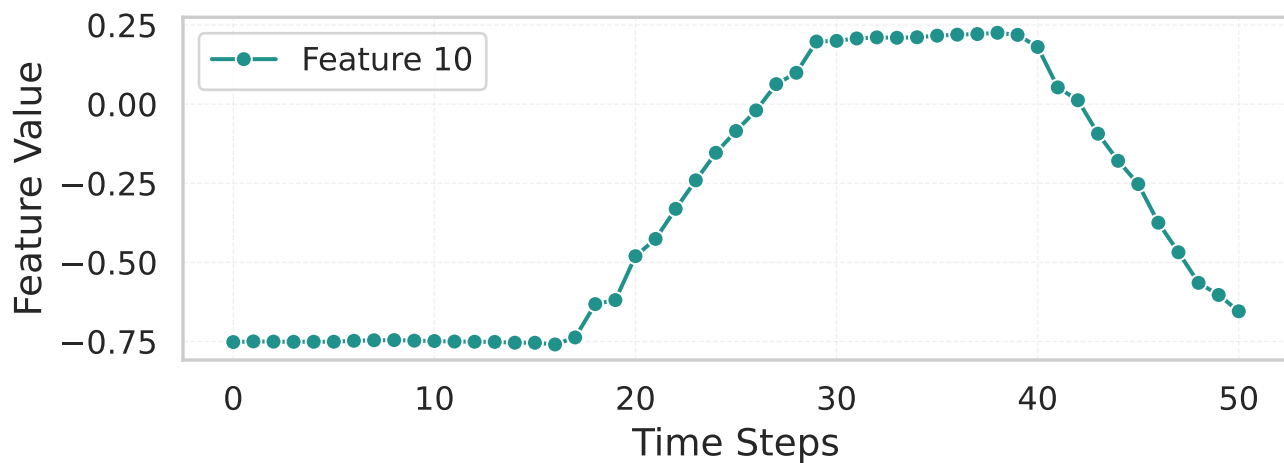



Sample Index: 52

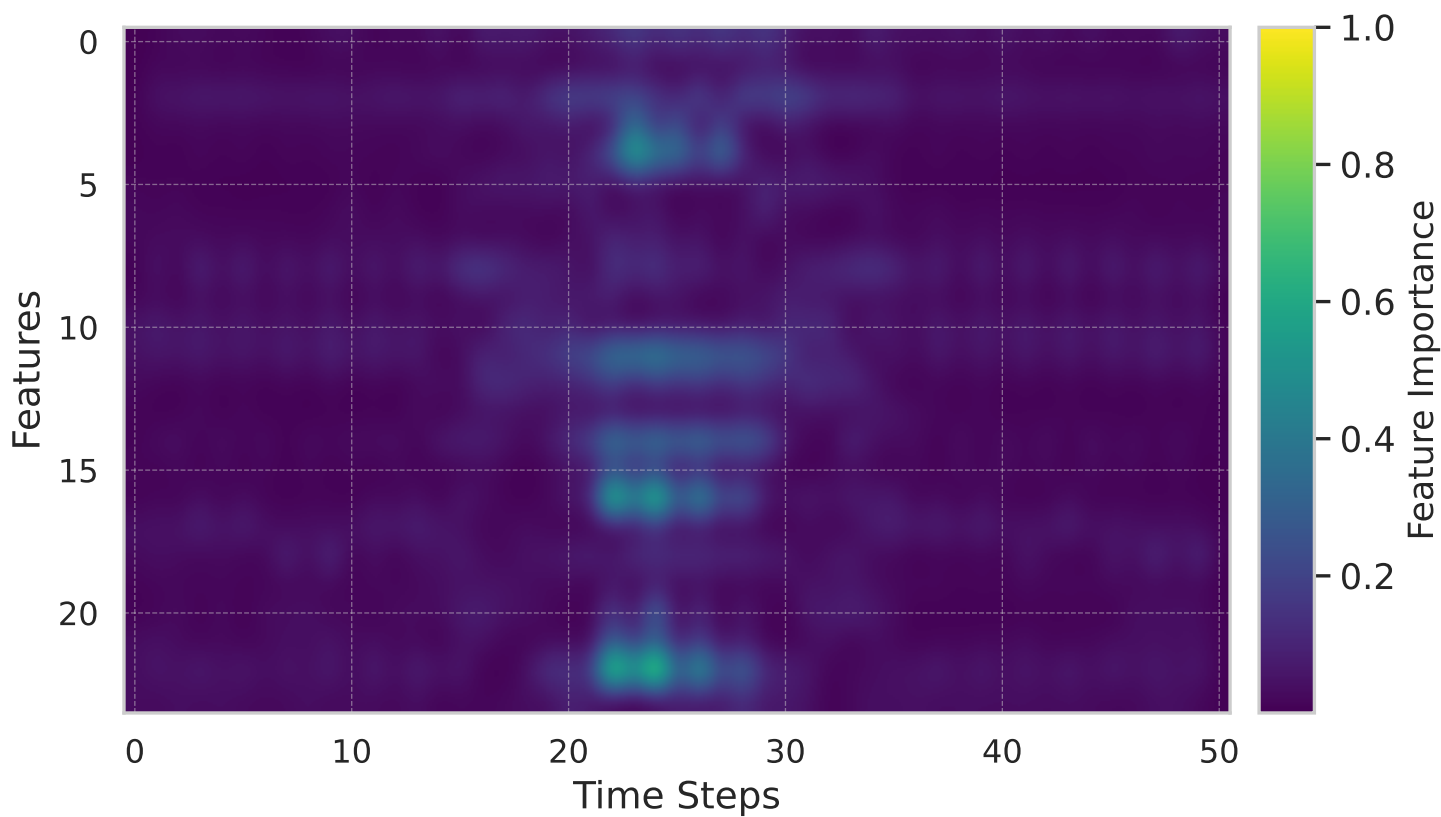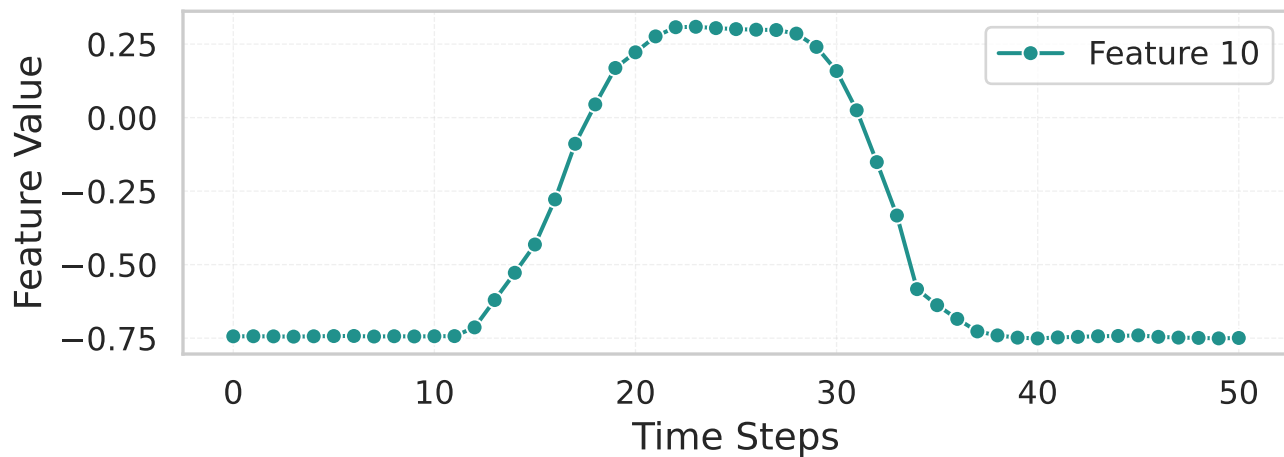

Sample Index: 53

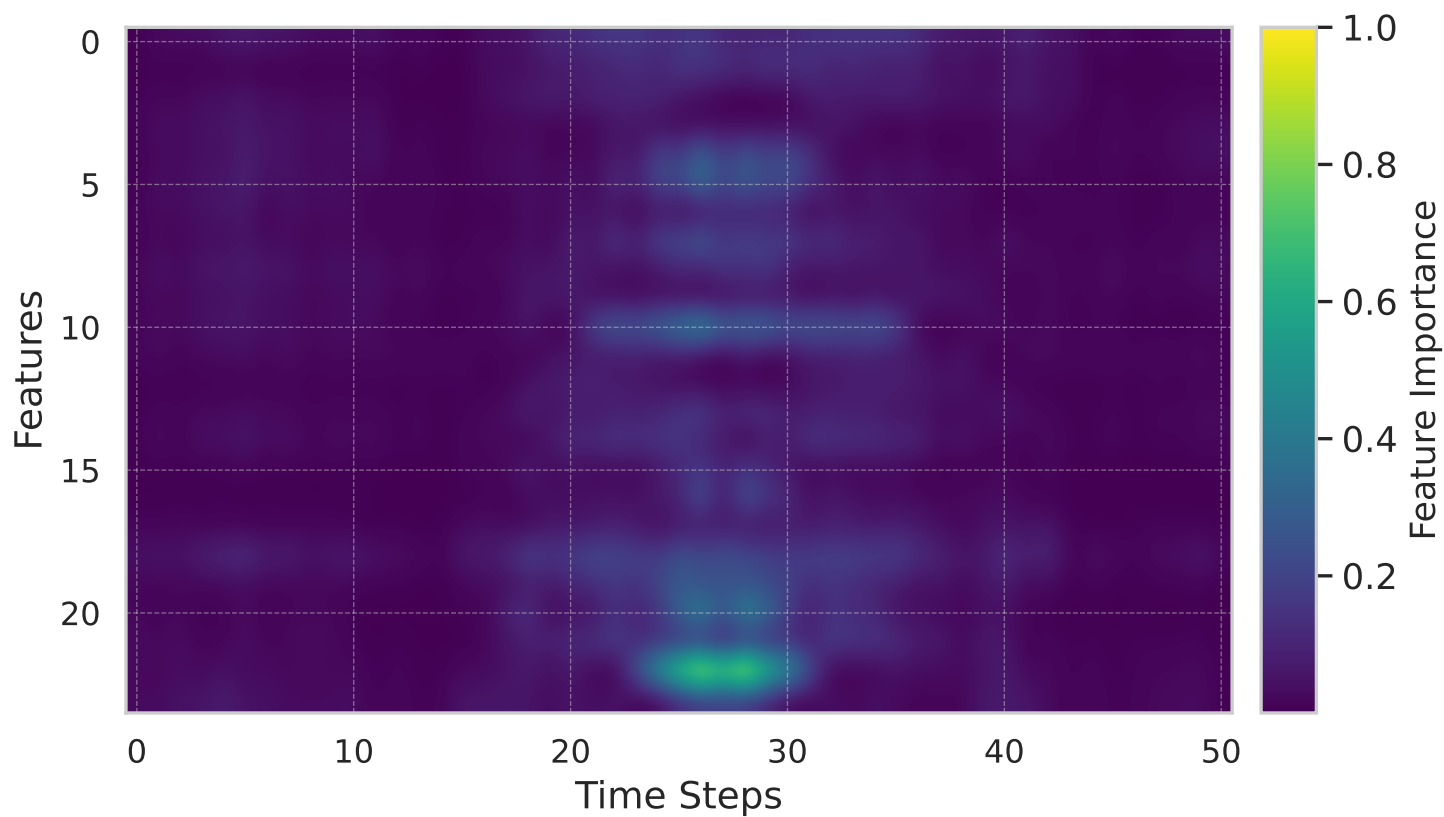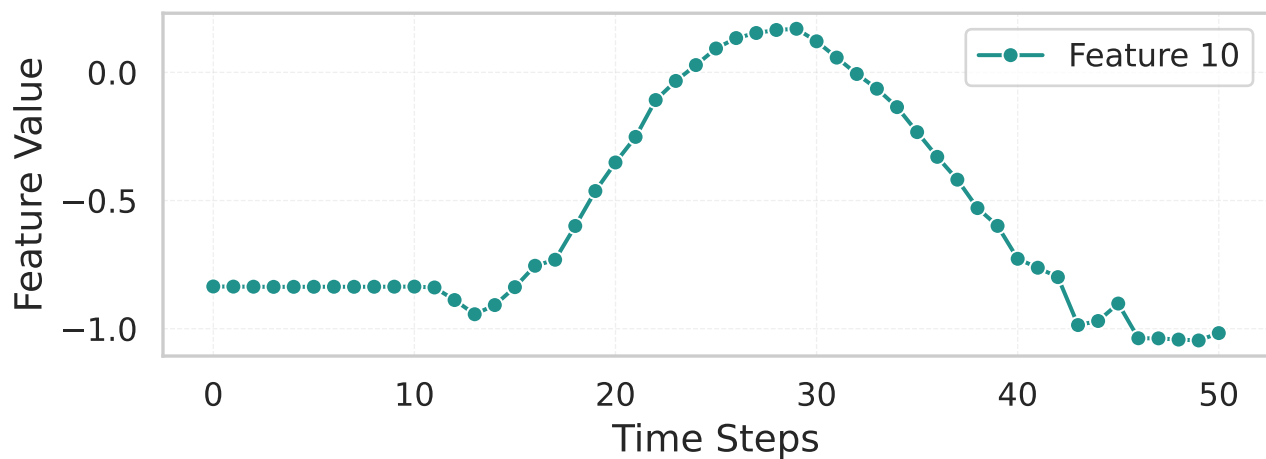

Sample Index: 54

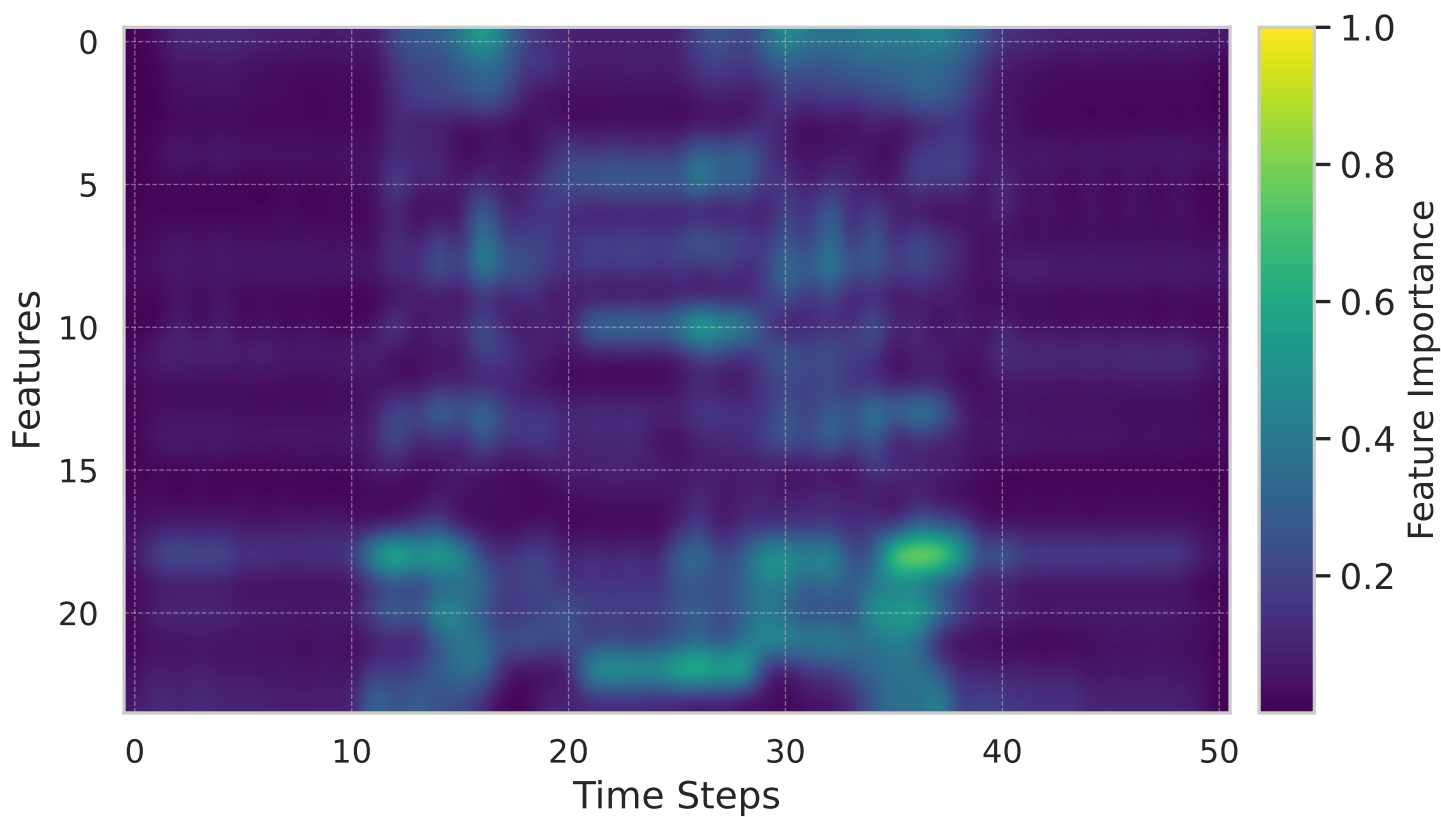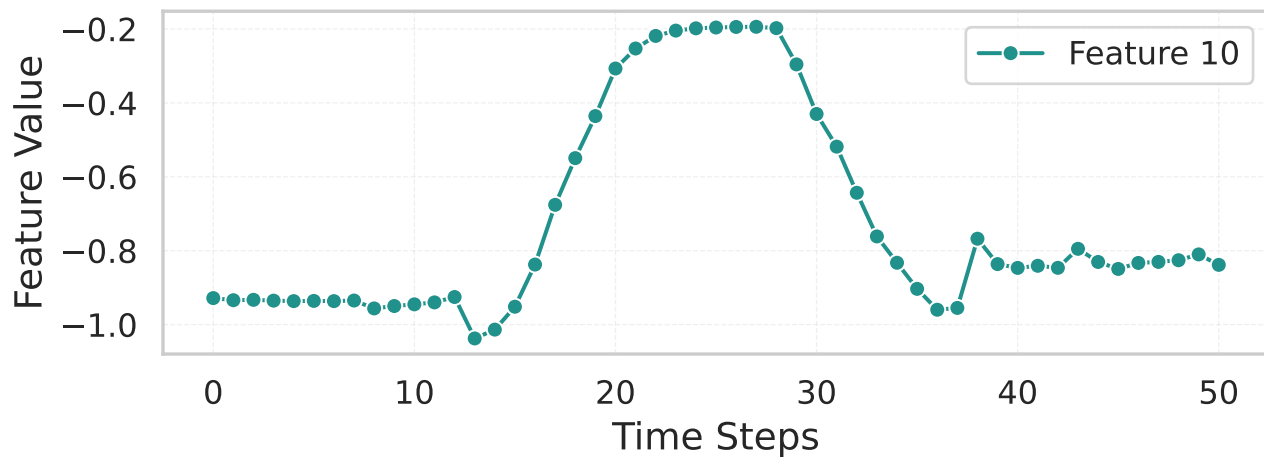

Sample Index: 55

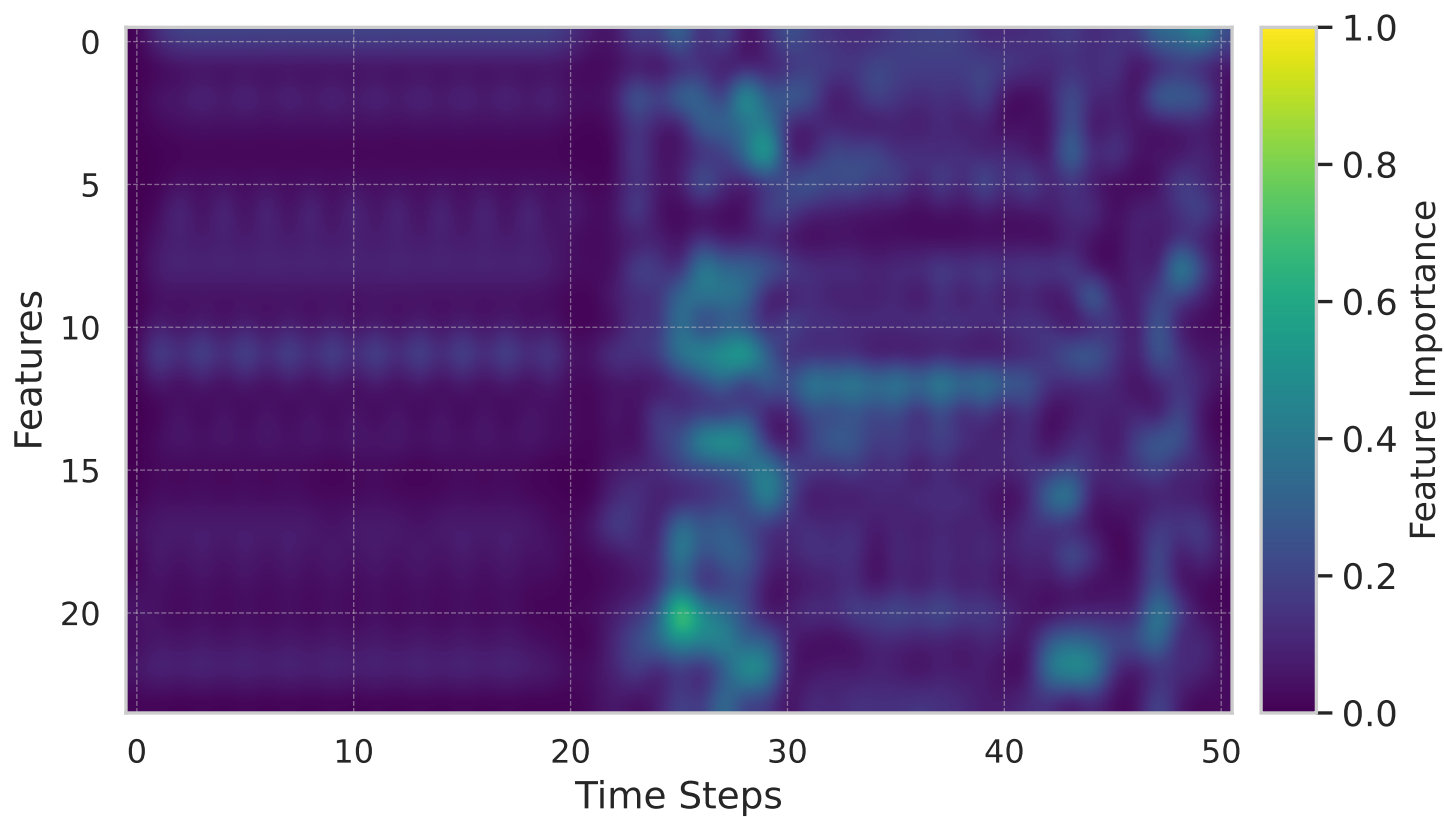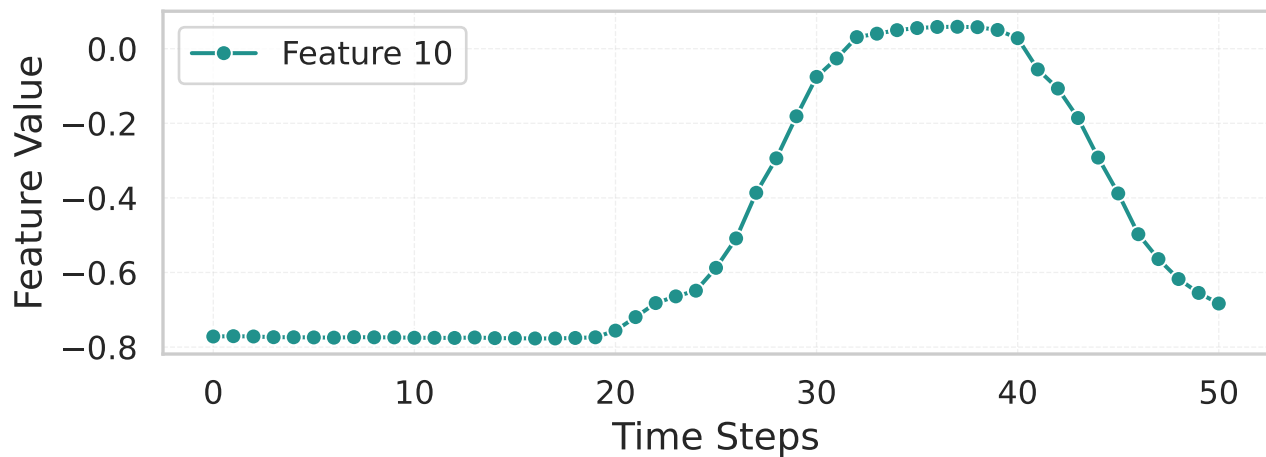

Sample Index: 56

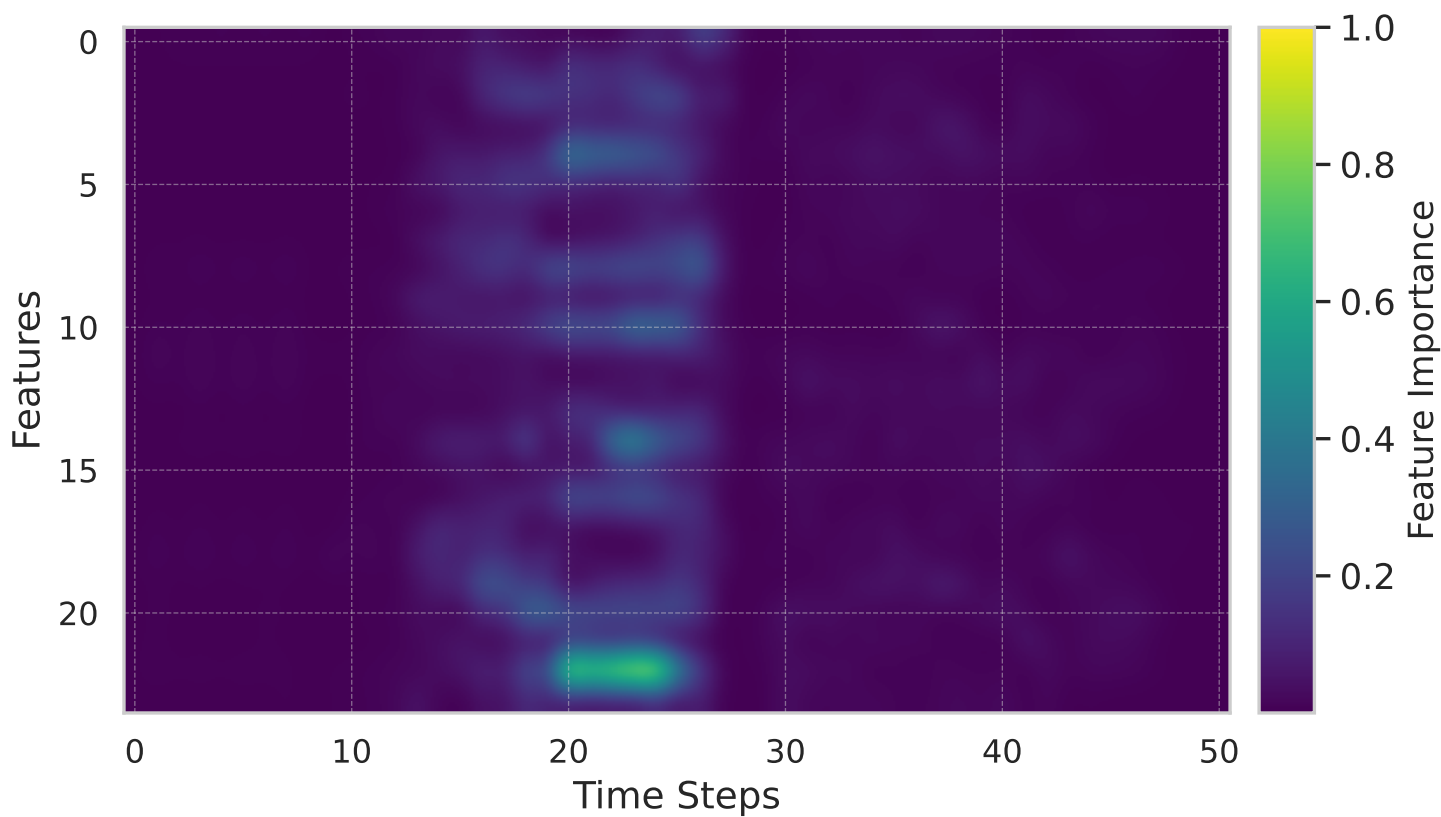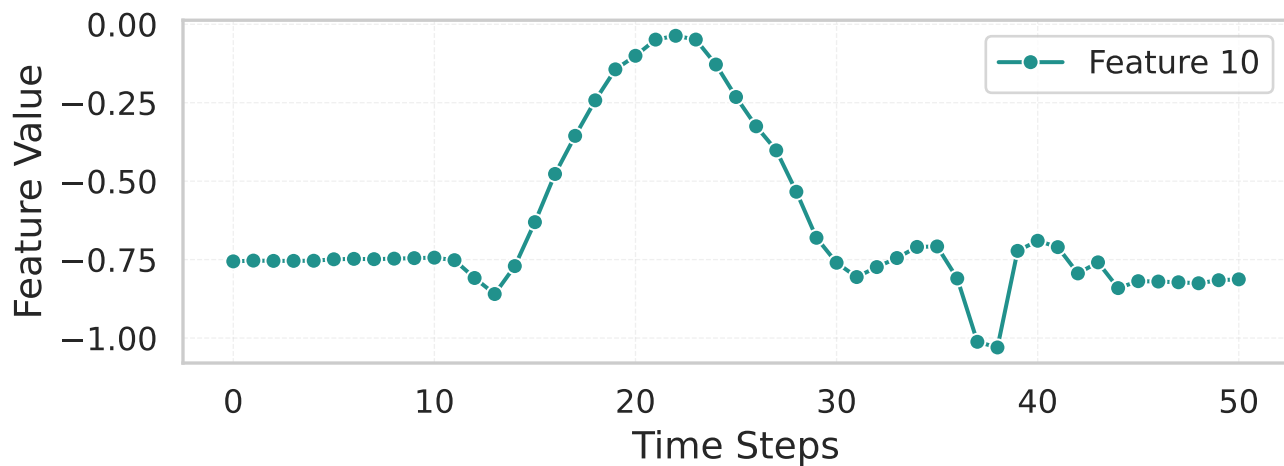

Sample Index: 57

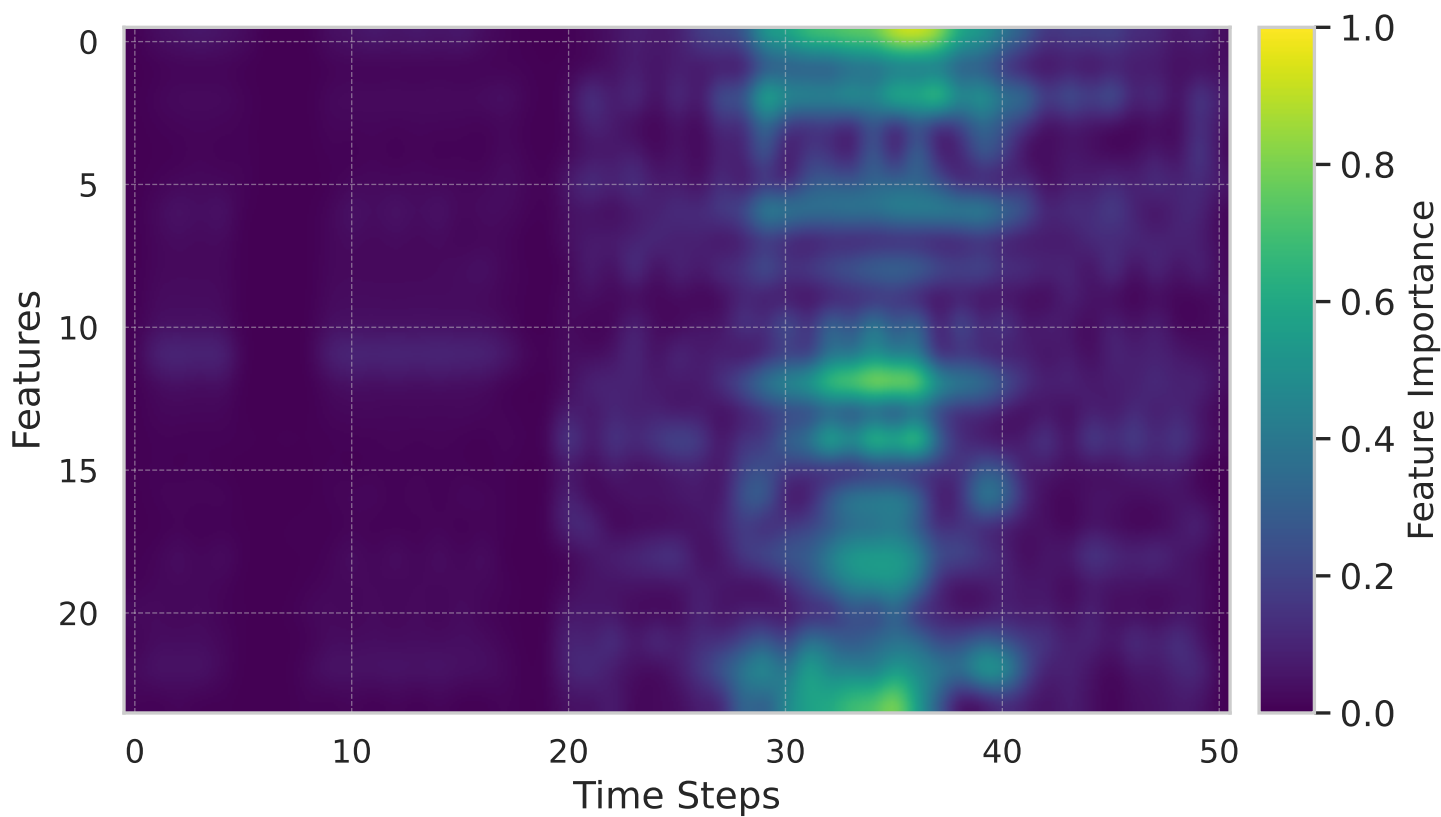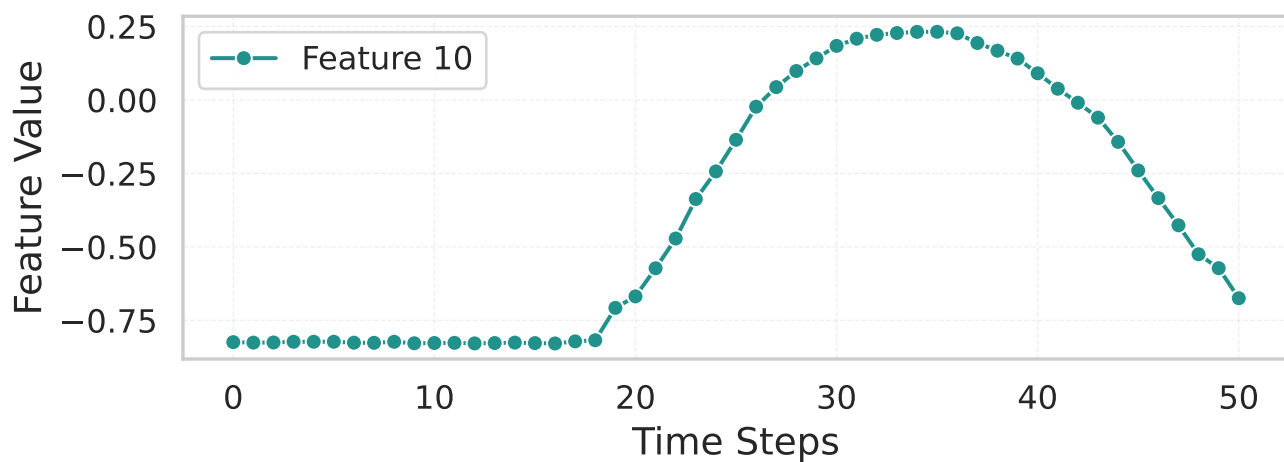

Sample Index: 58

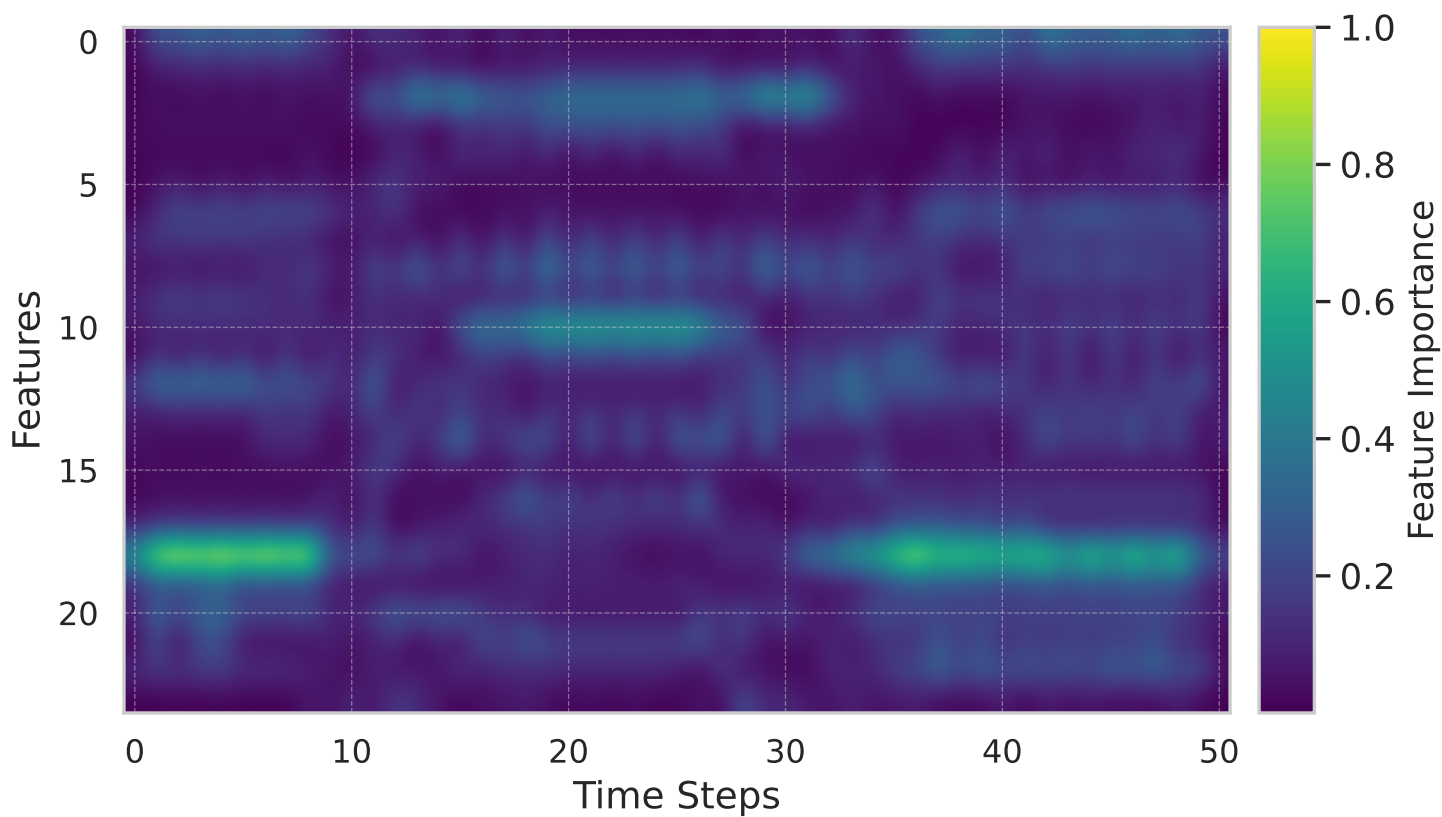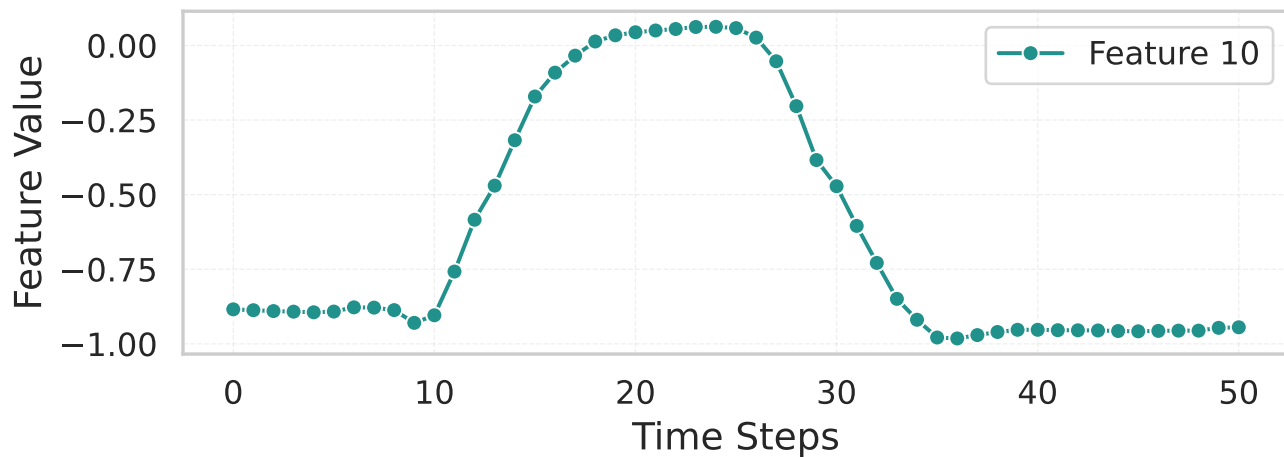

Sample Index: 59

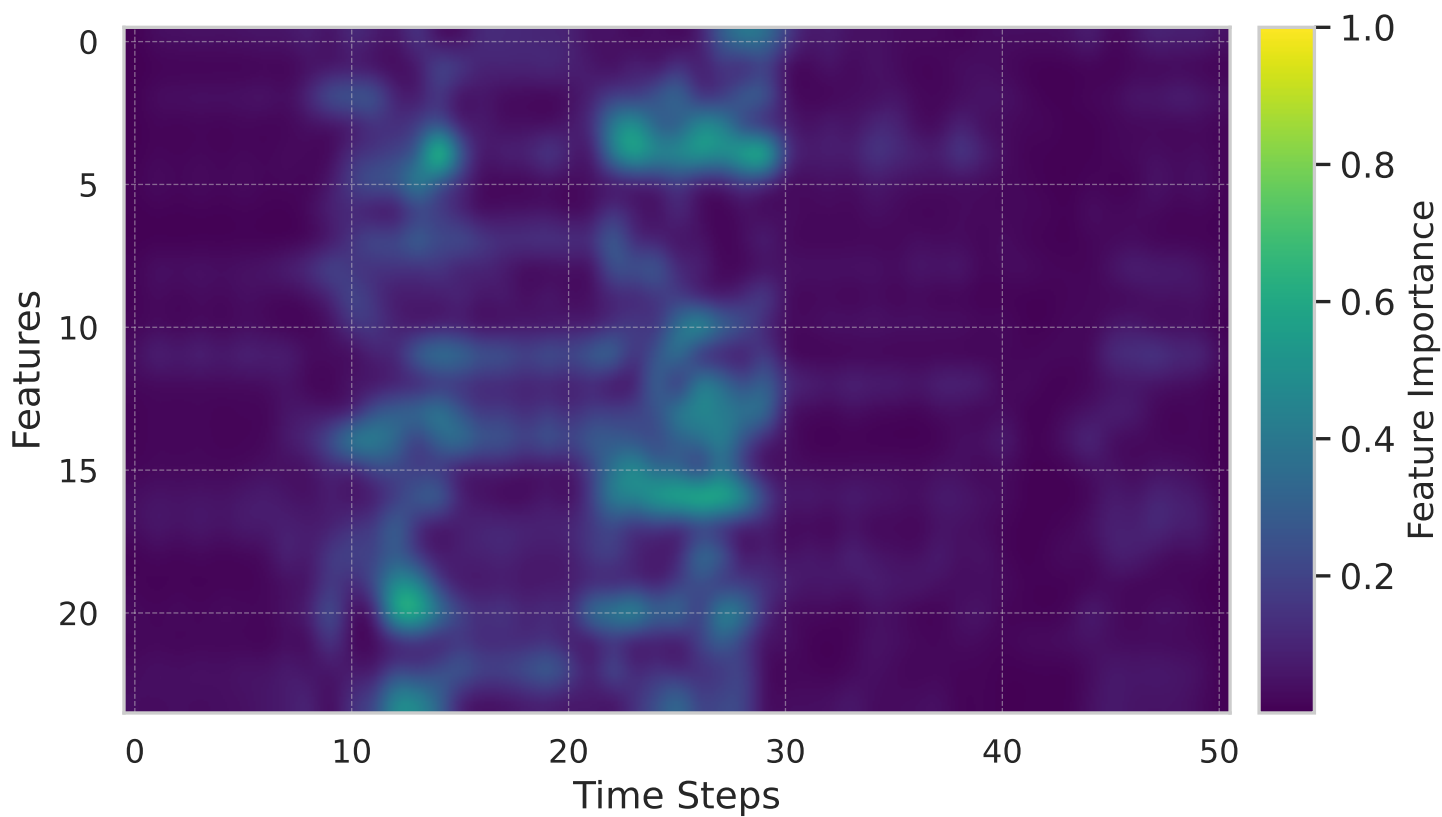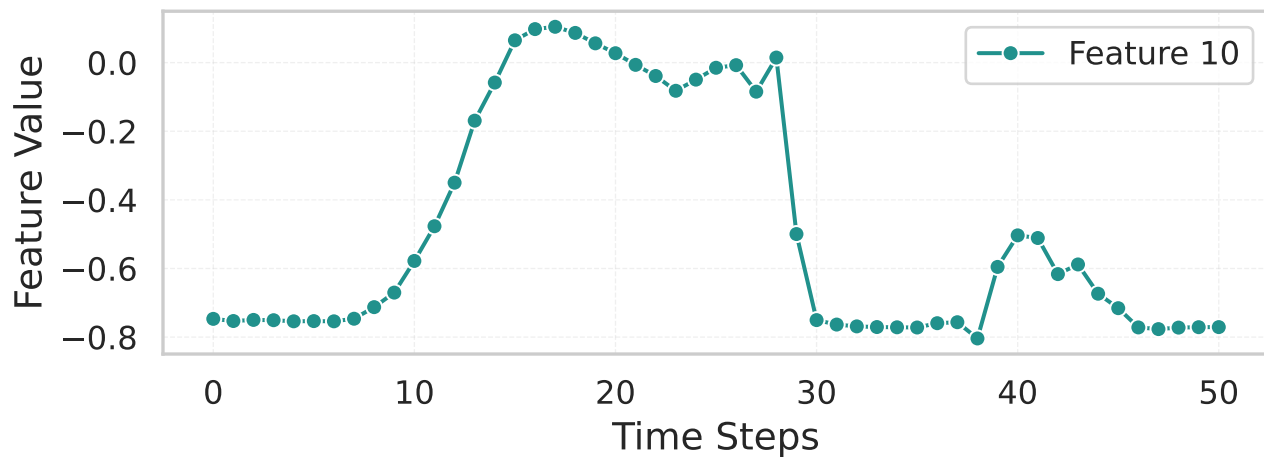



Sample Index: 60

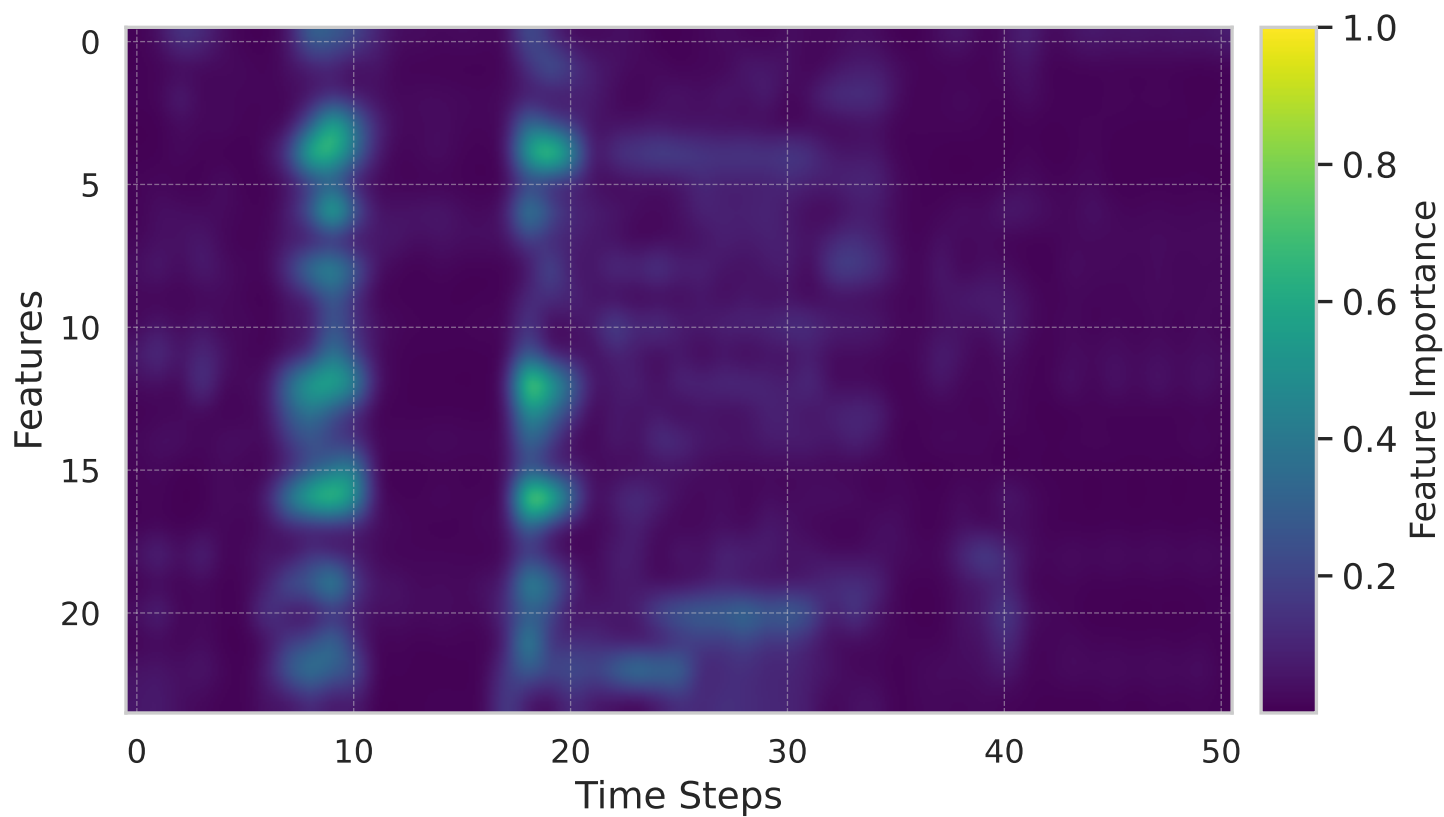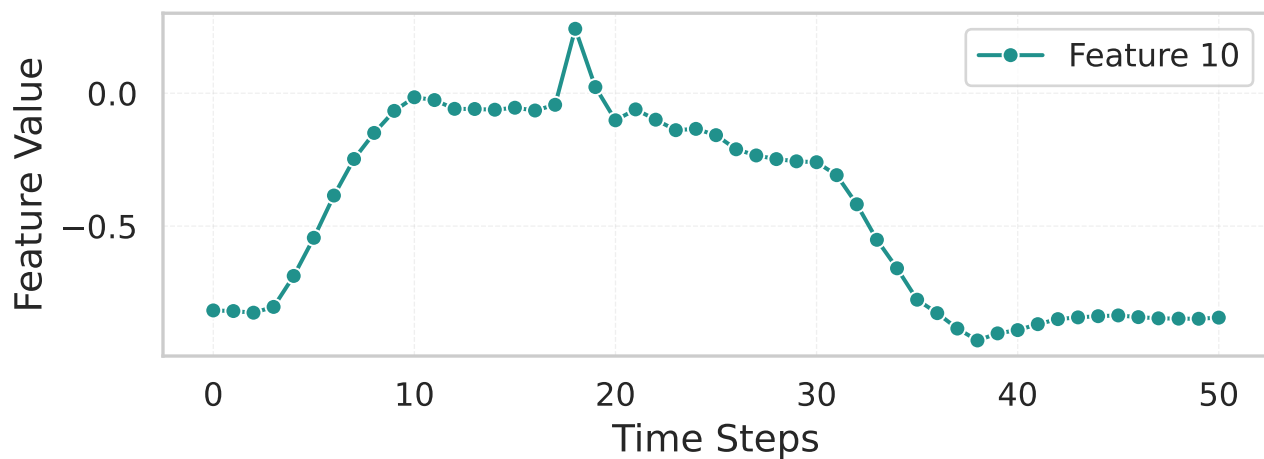

Sample Index: 61

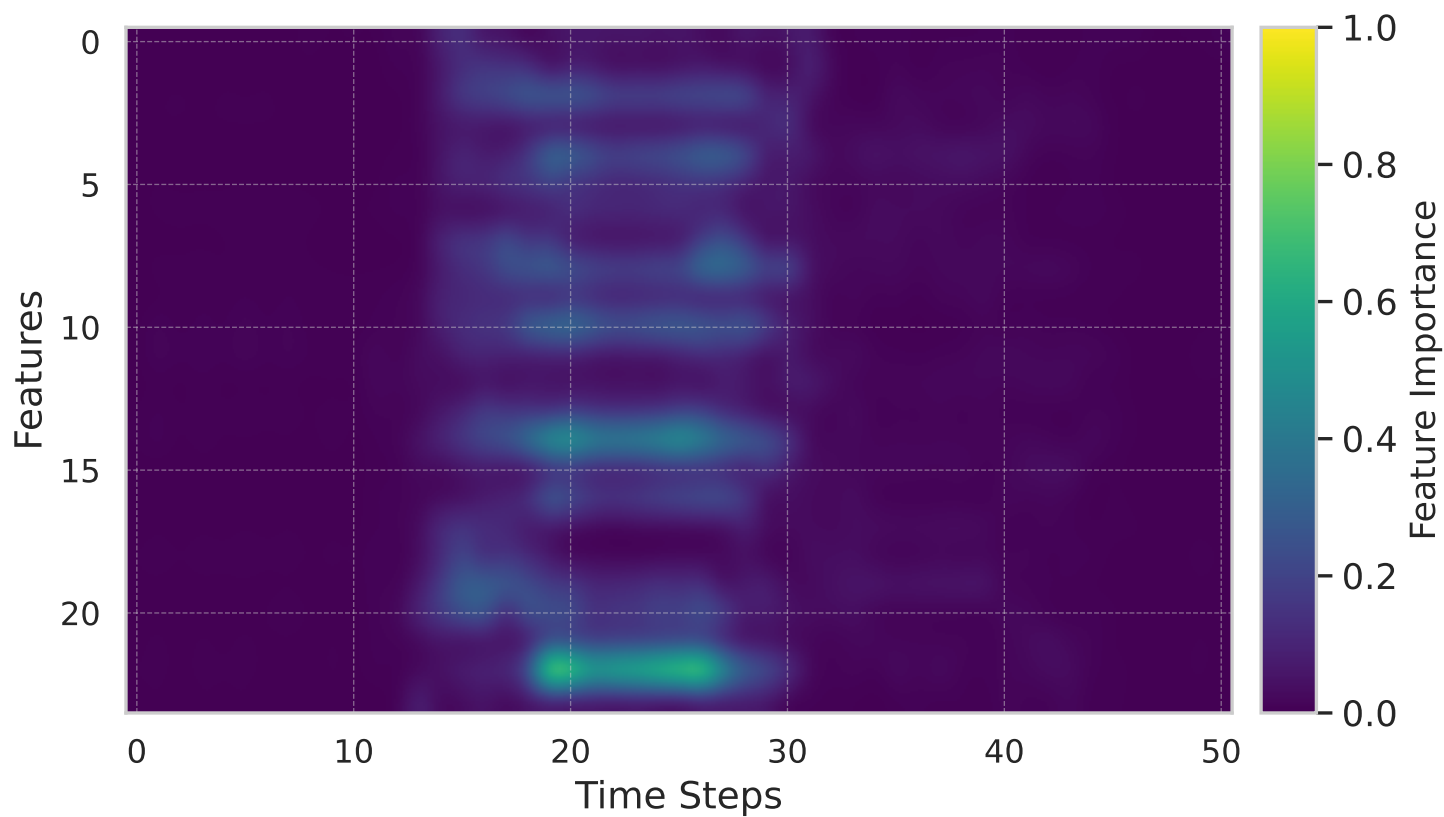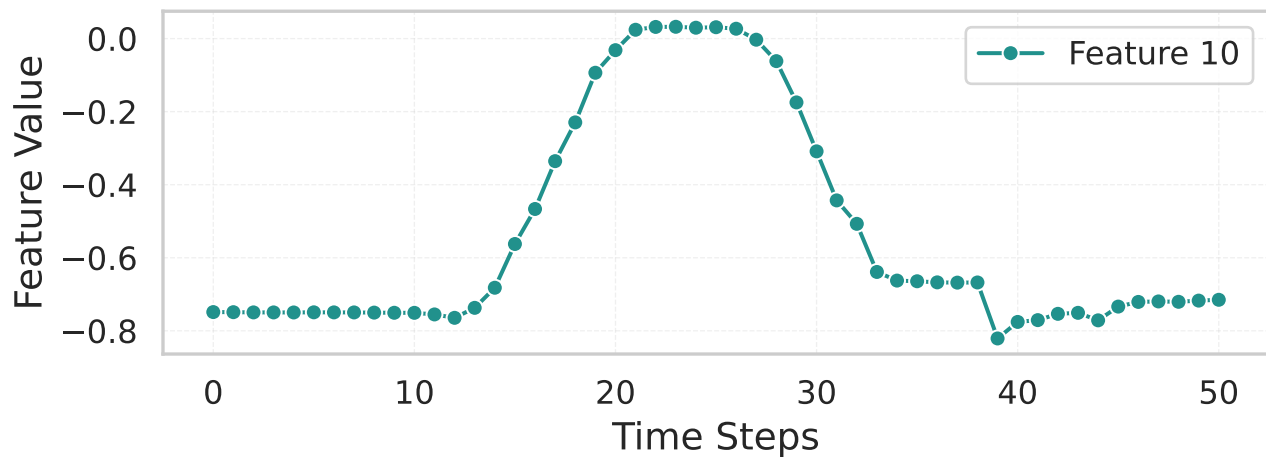

Sample Index: 62

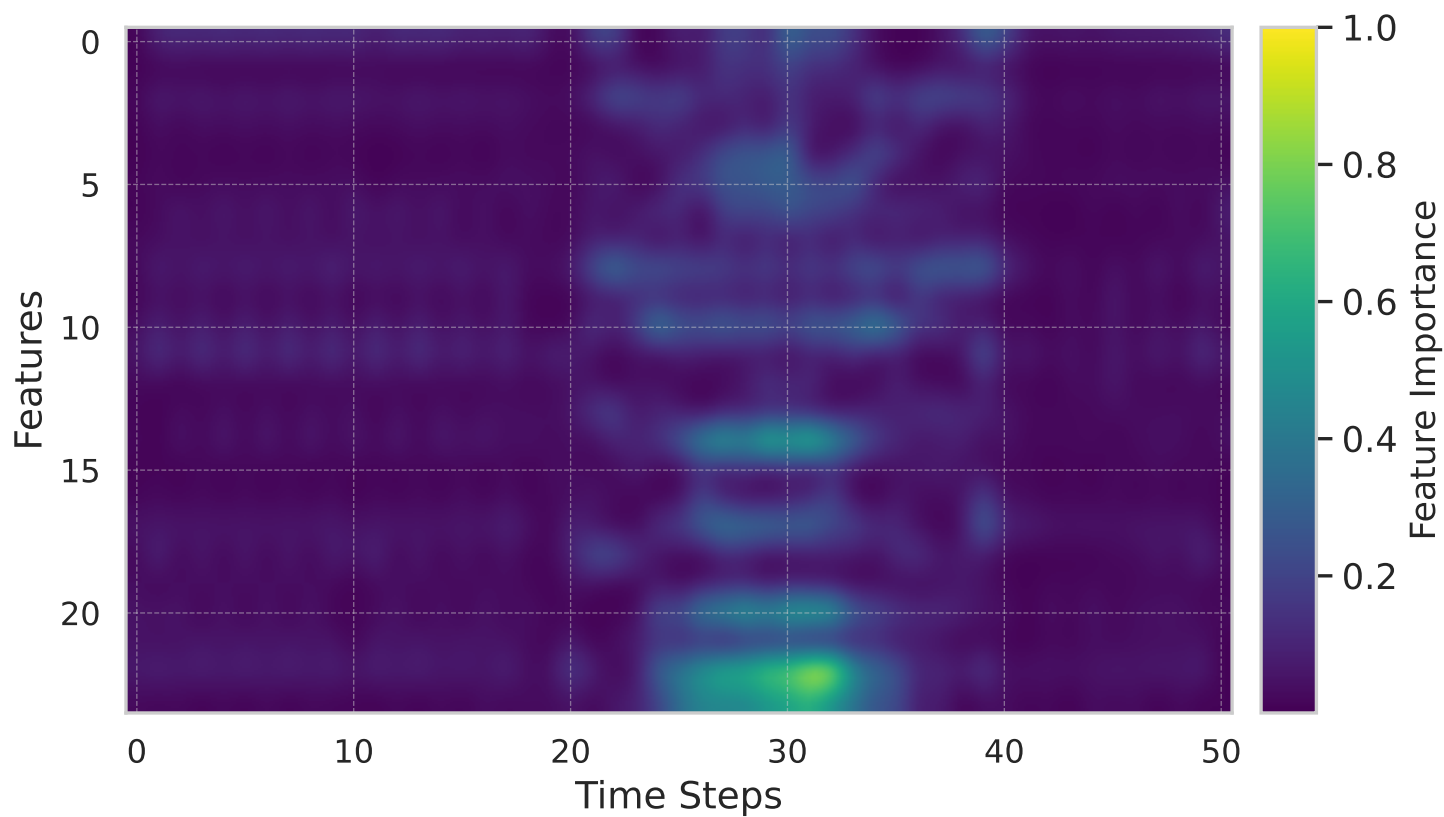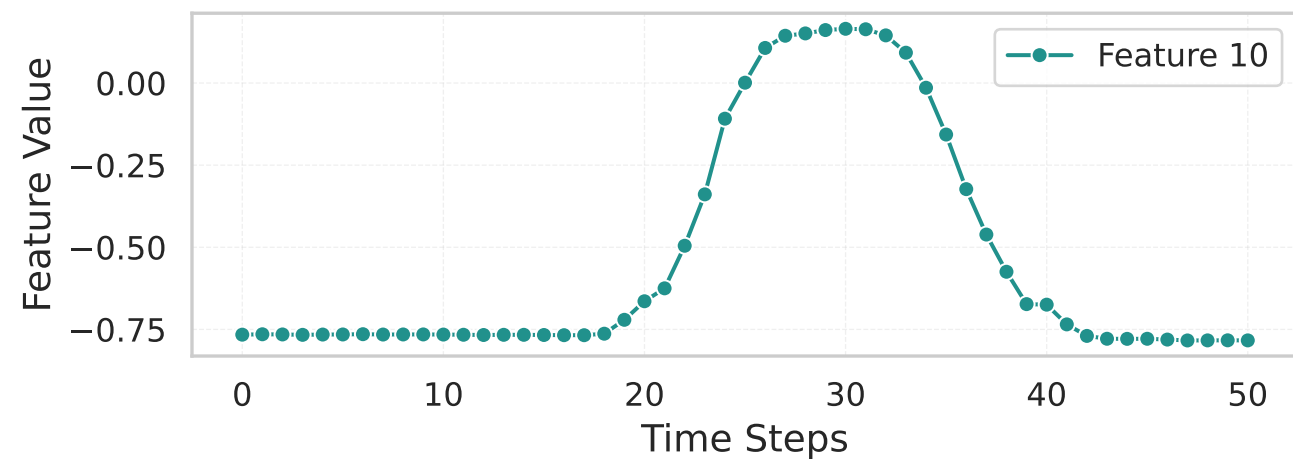

Sample Index: 63

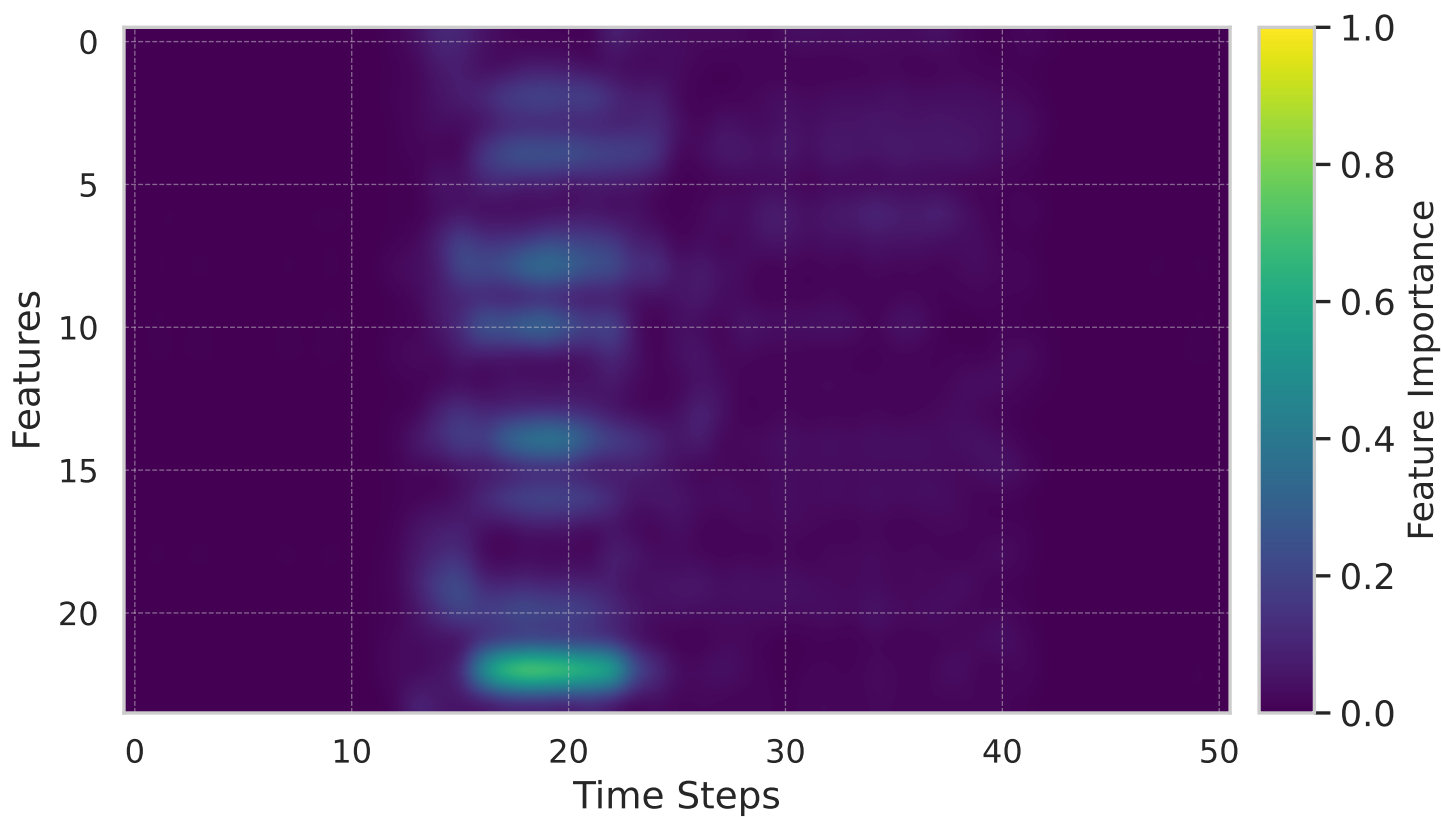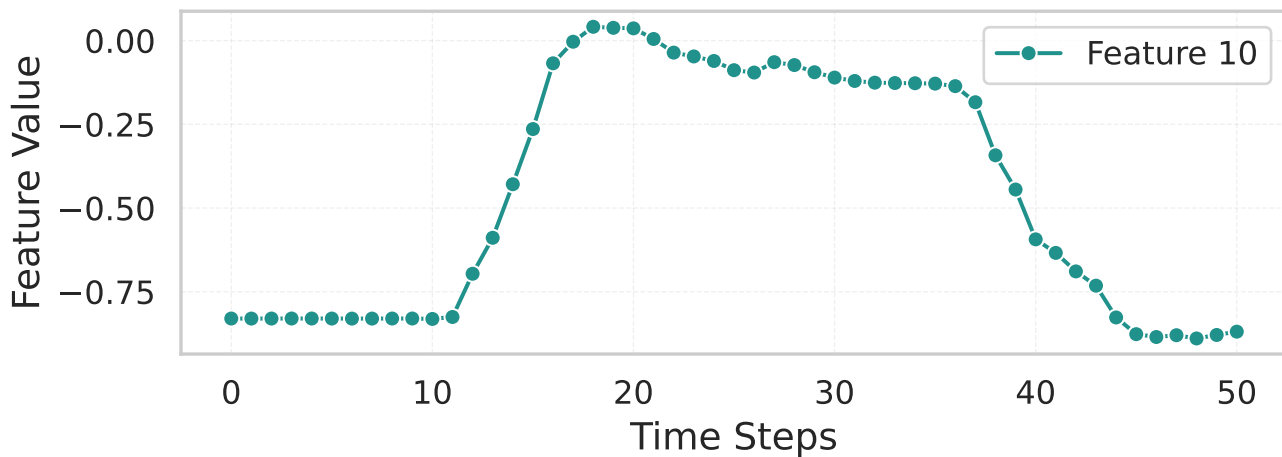

Sample Index: 64

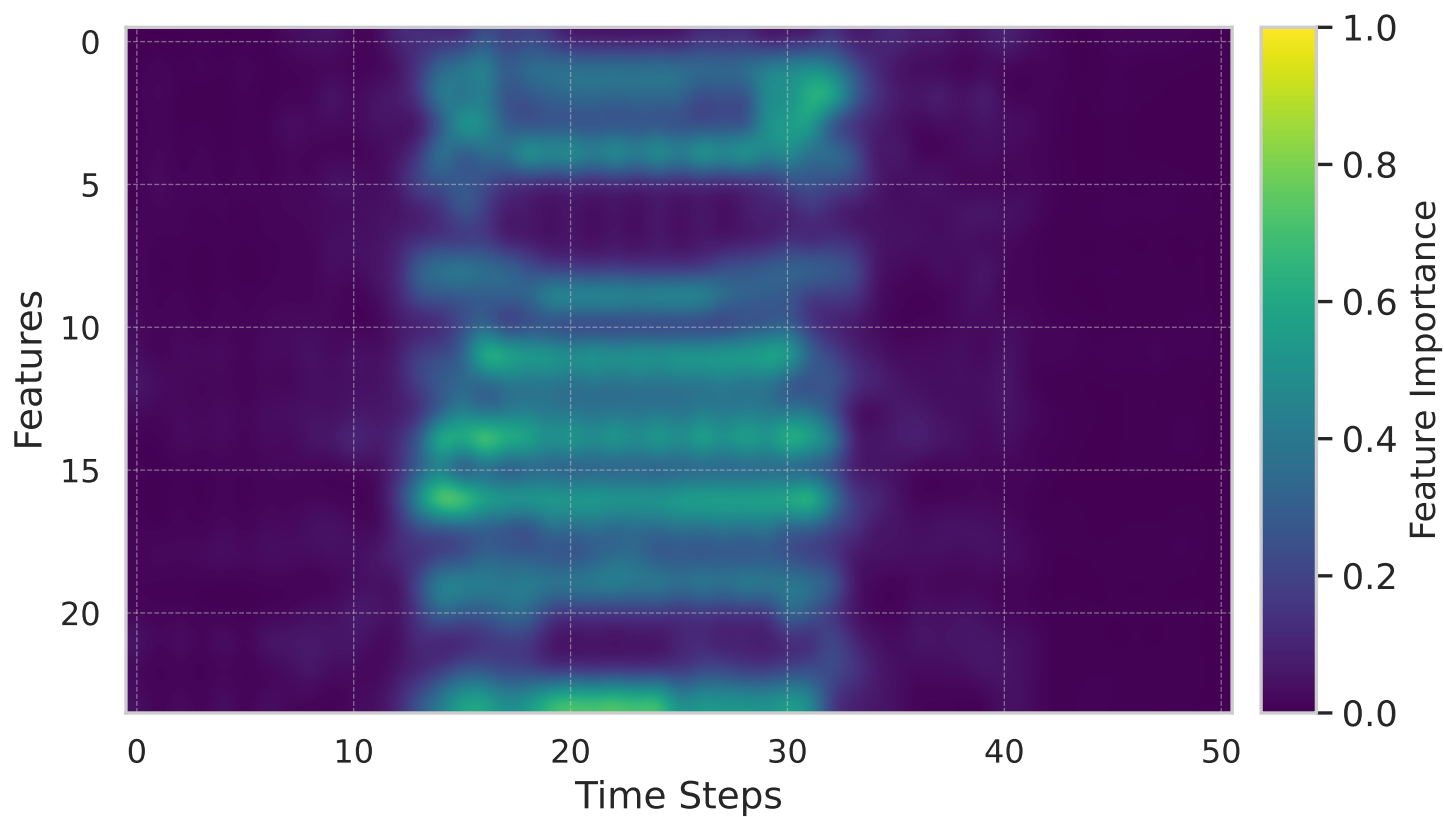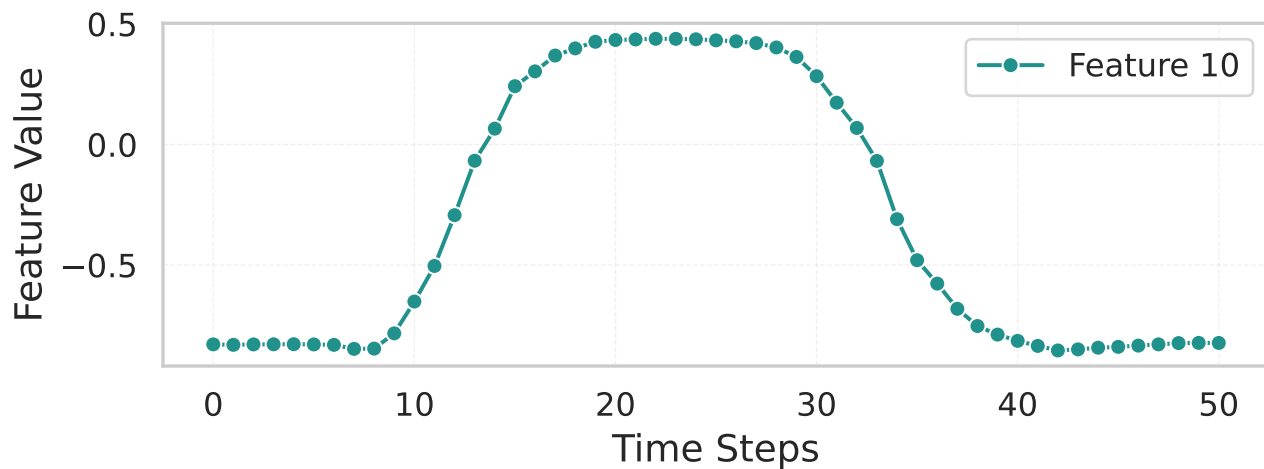

Sample Index: 65

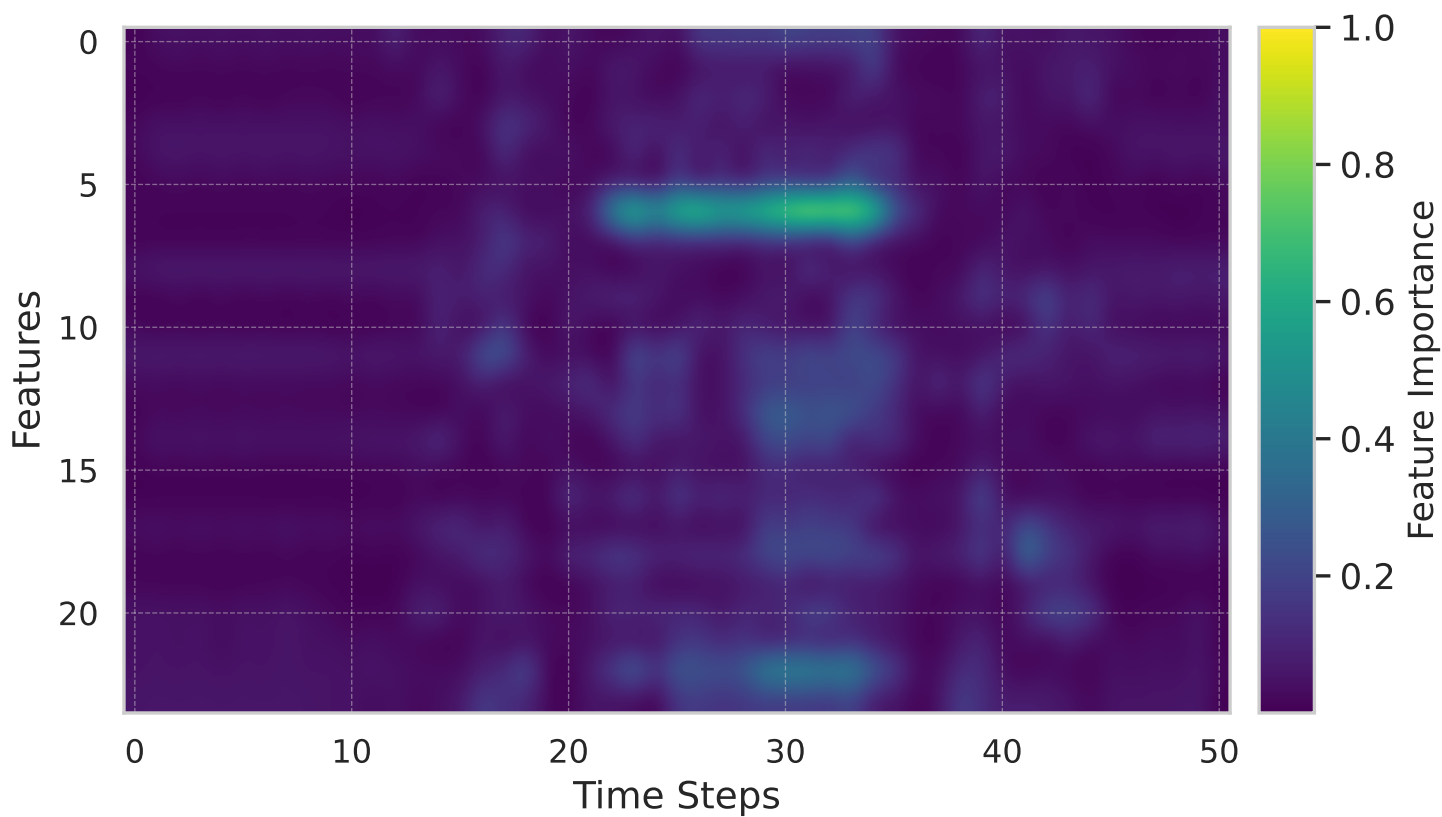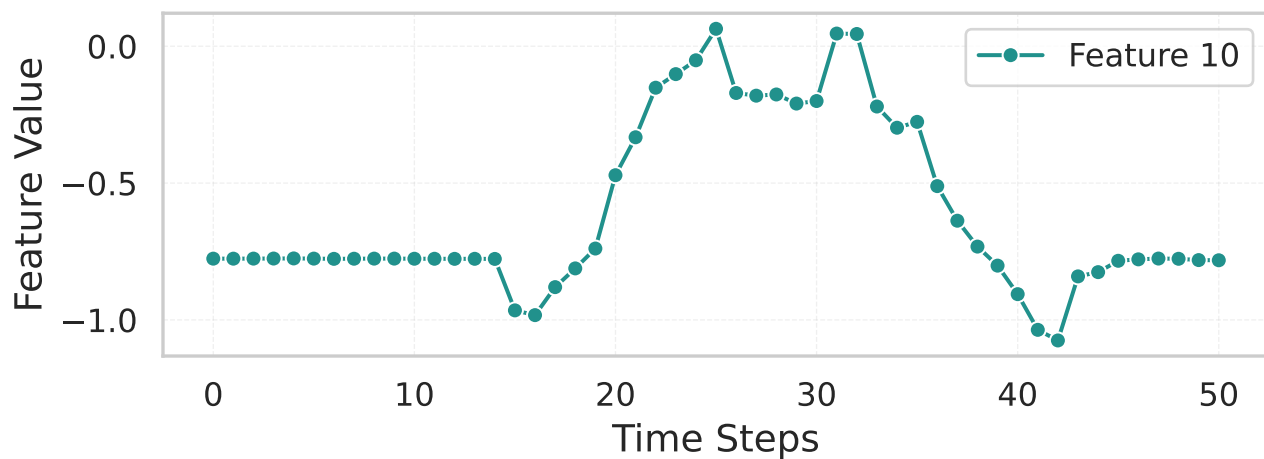

Sample Index: 66

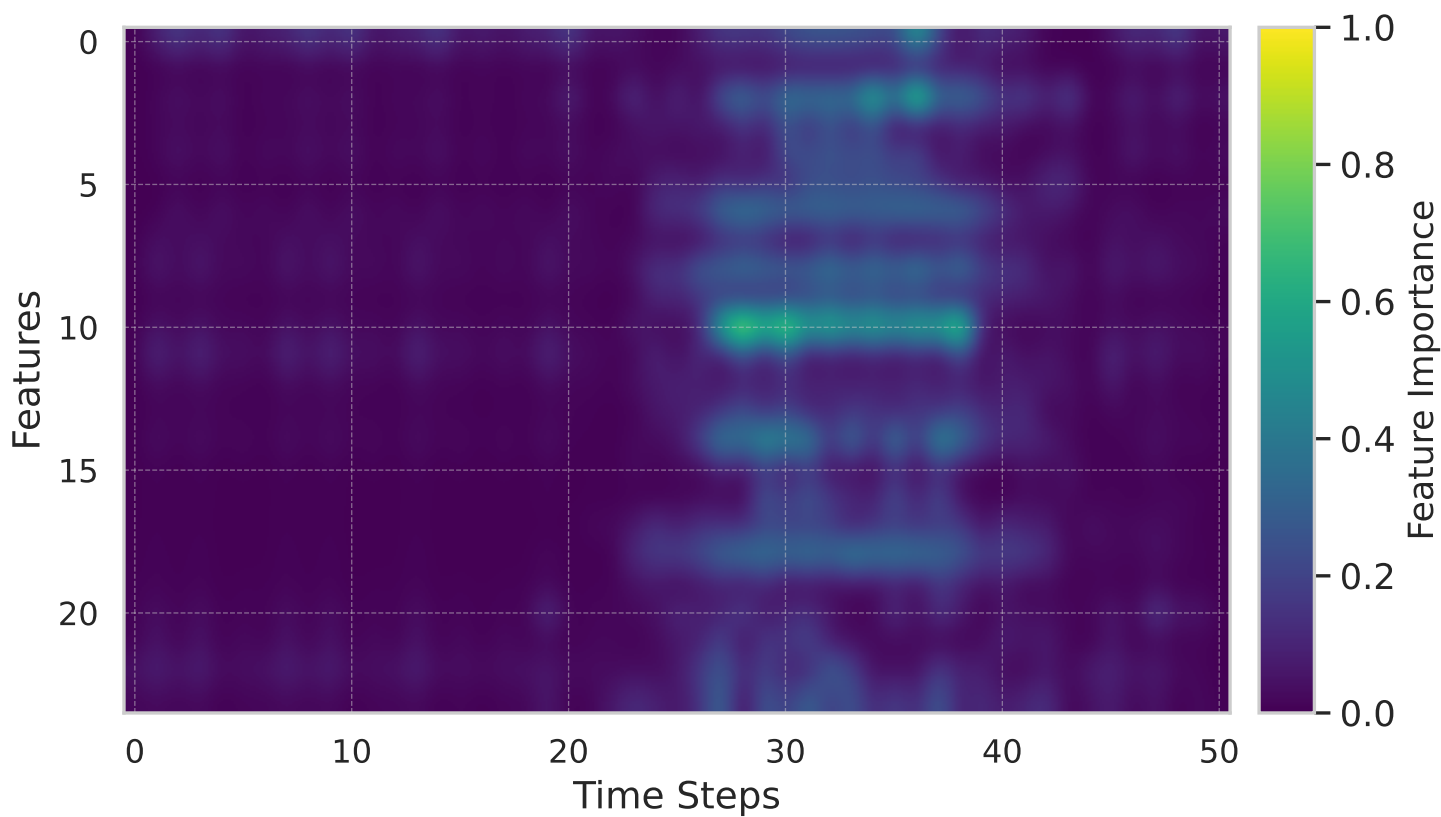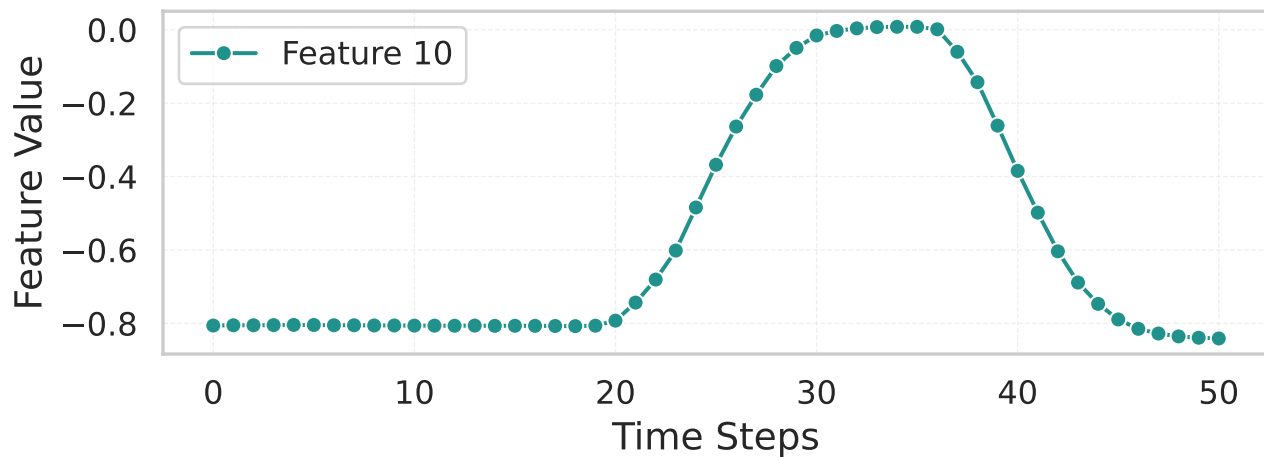

Sample Index: 67

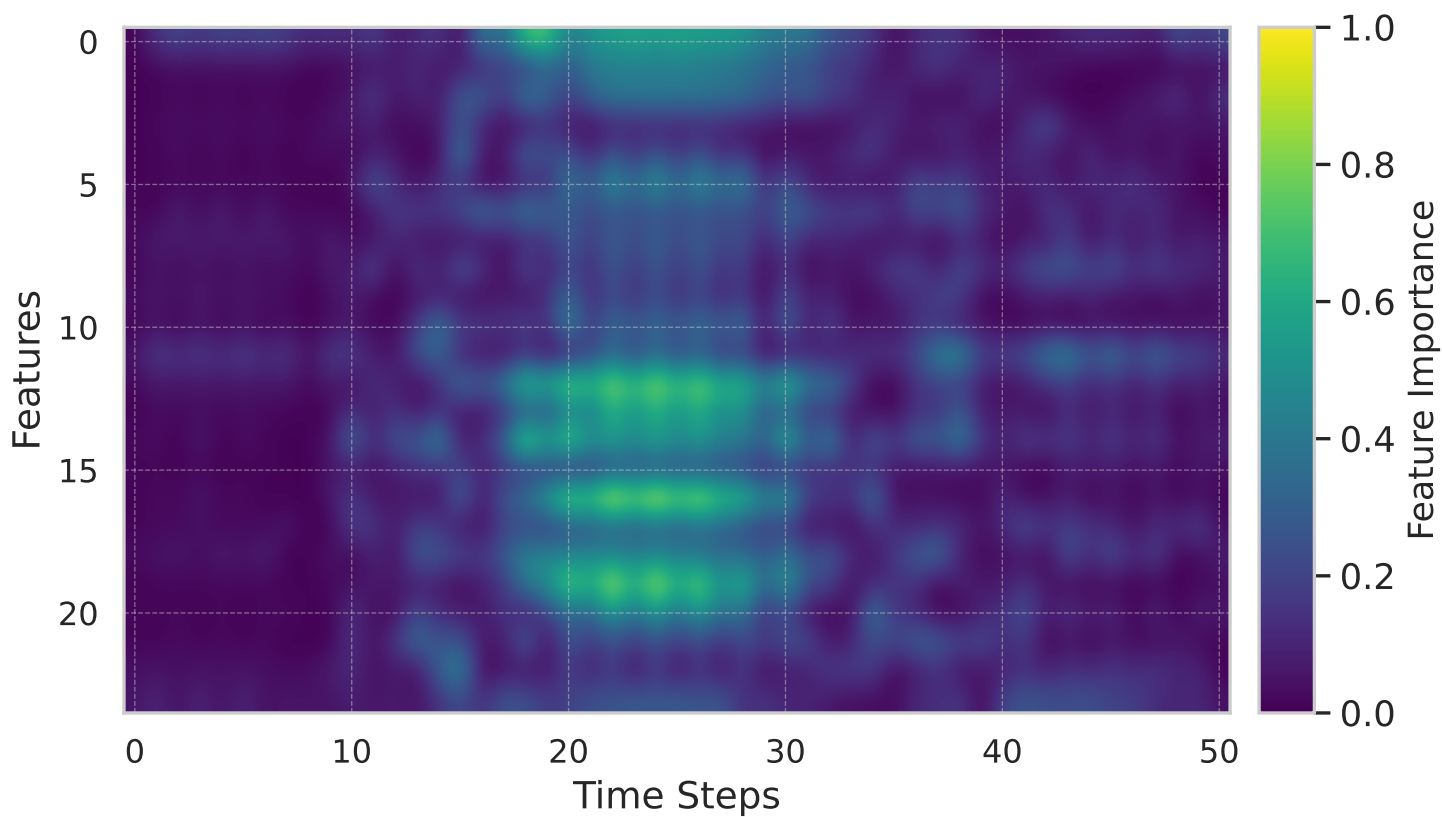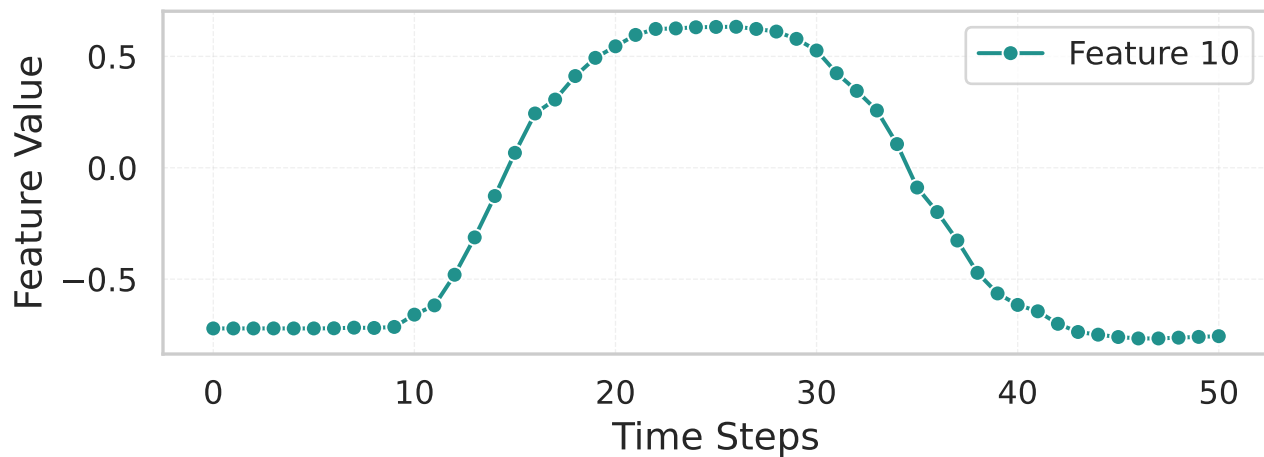



Sample Index: 68

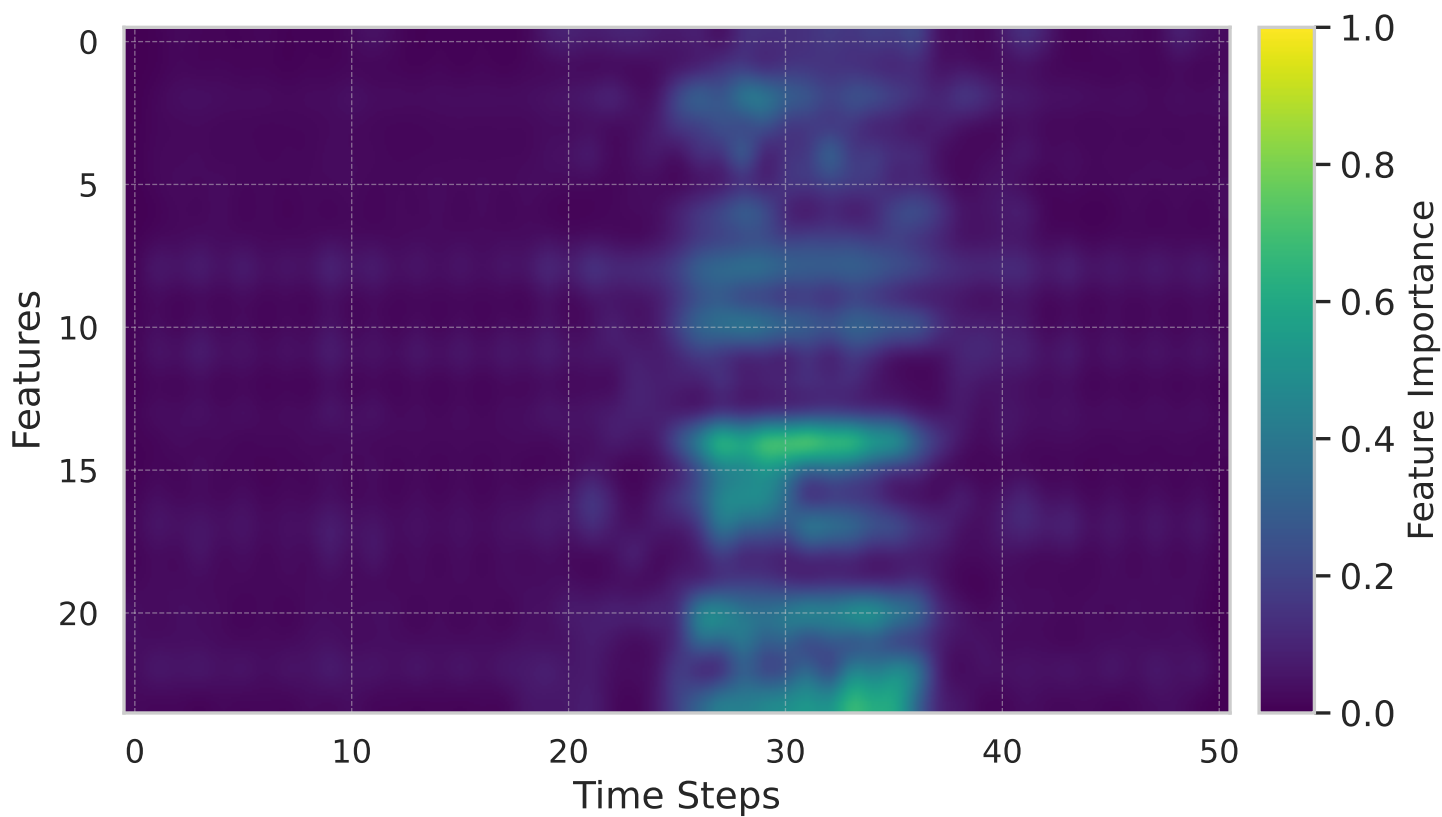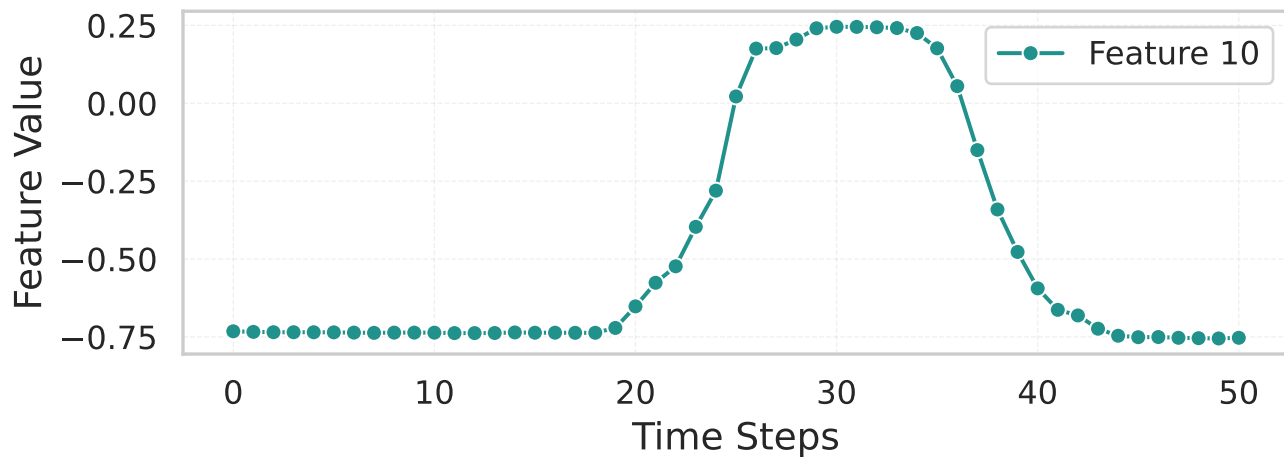

Sample Index: 69

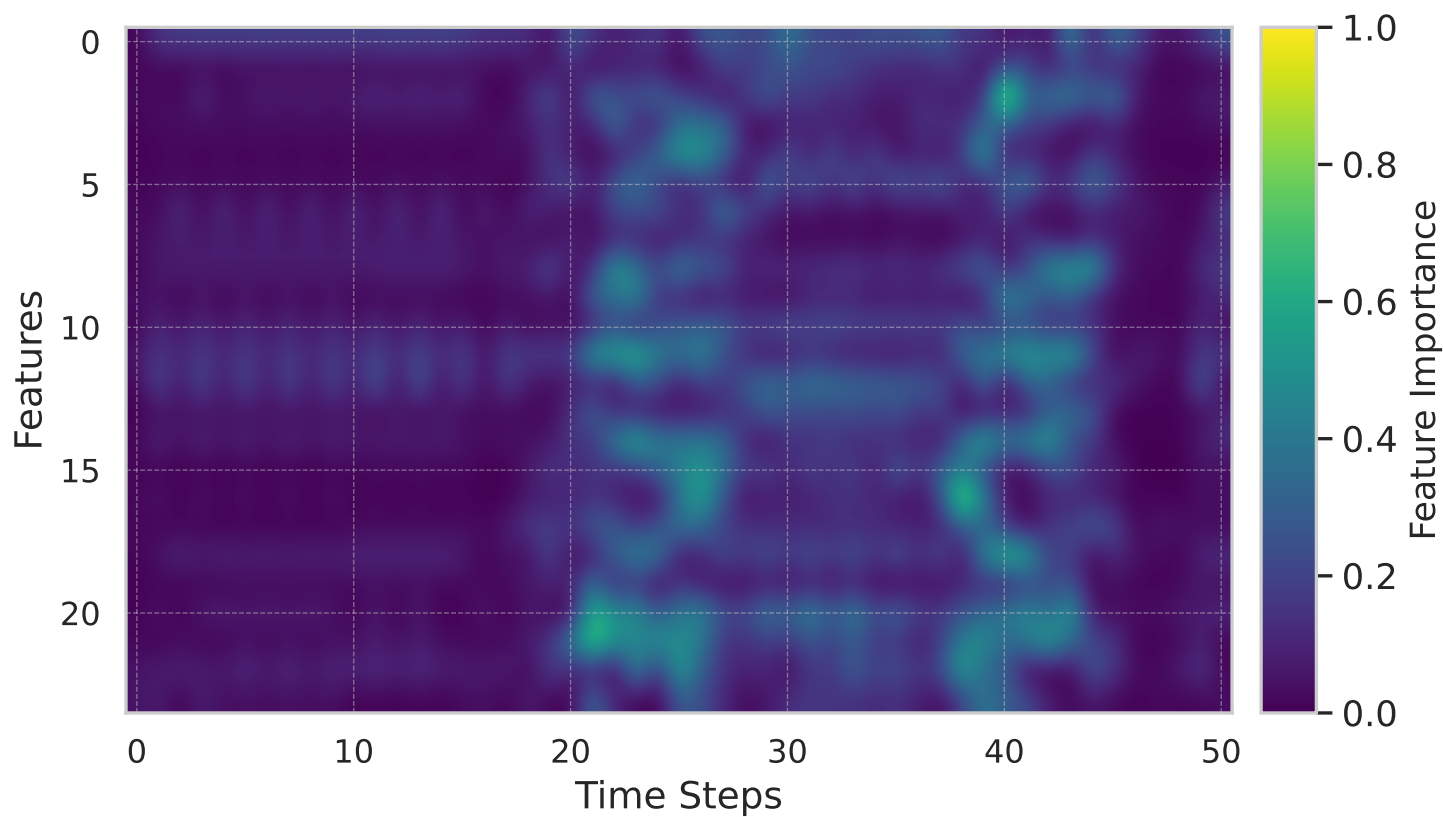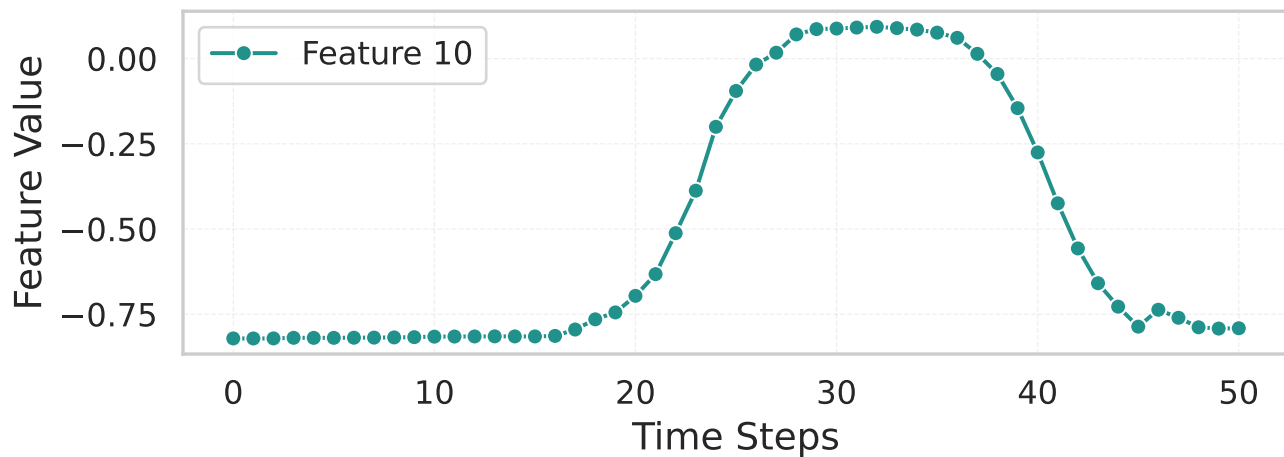

Sample Index: 70

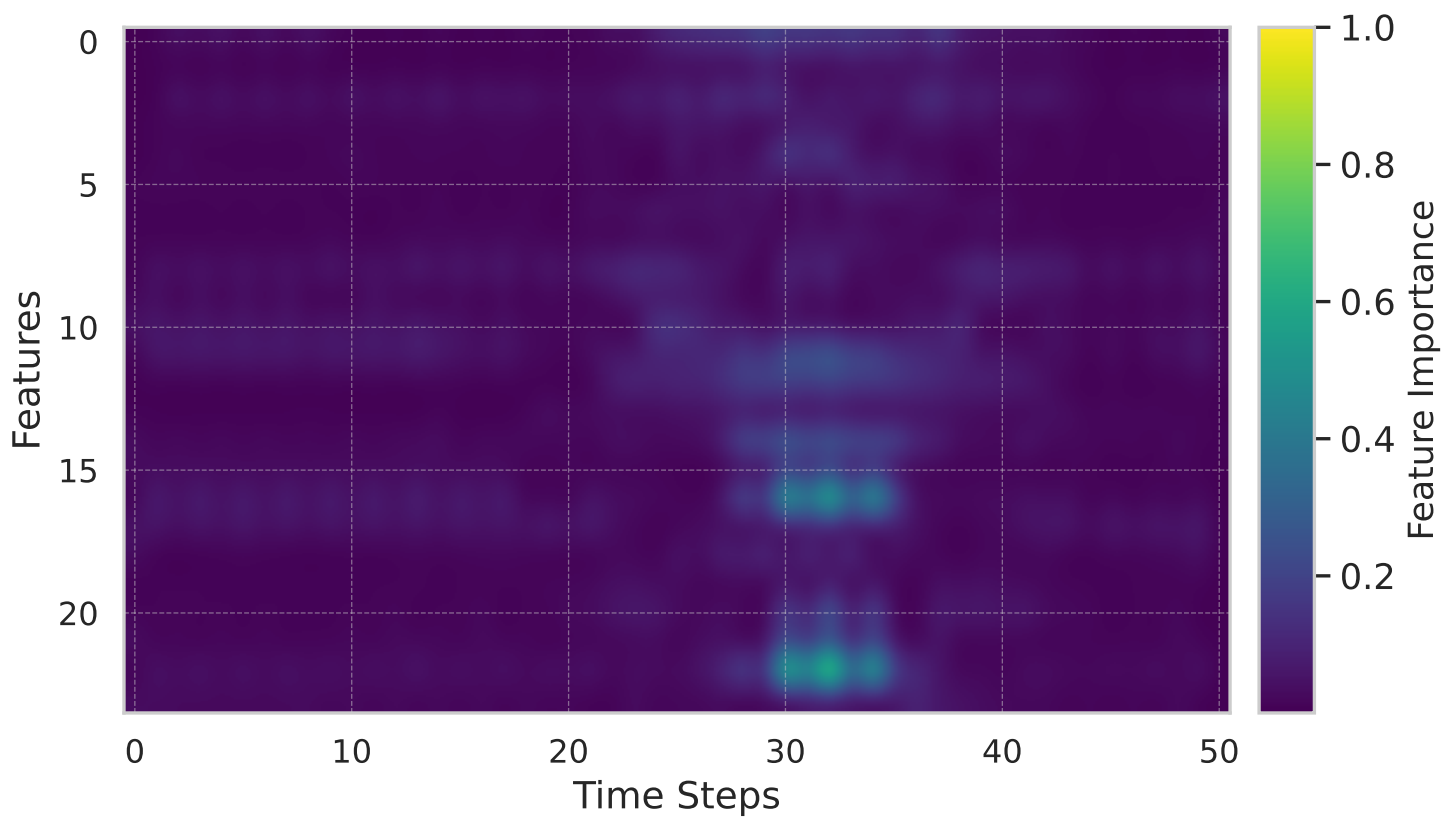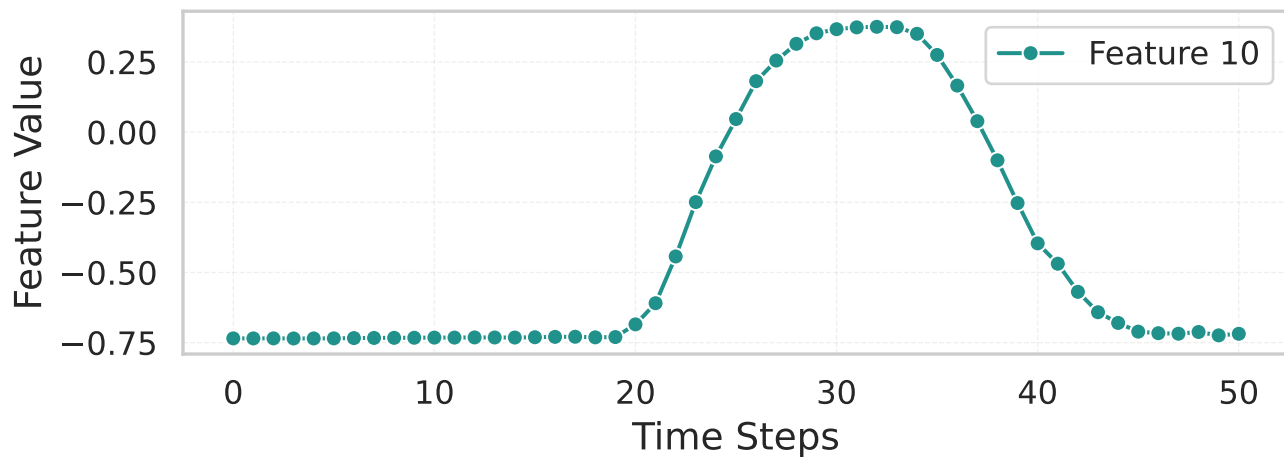

Sample Index: 71

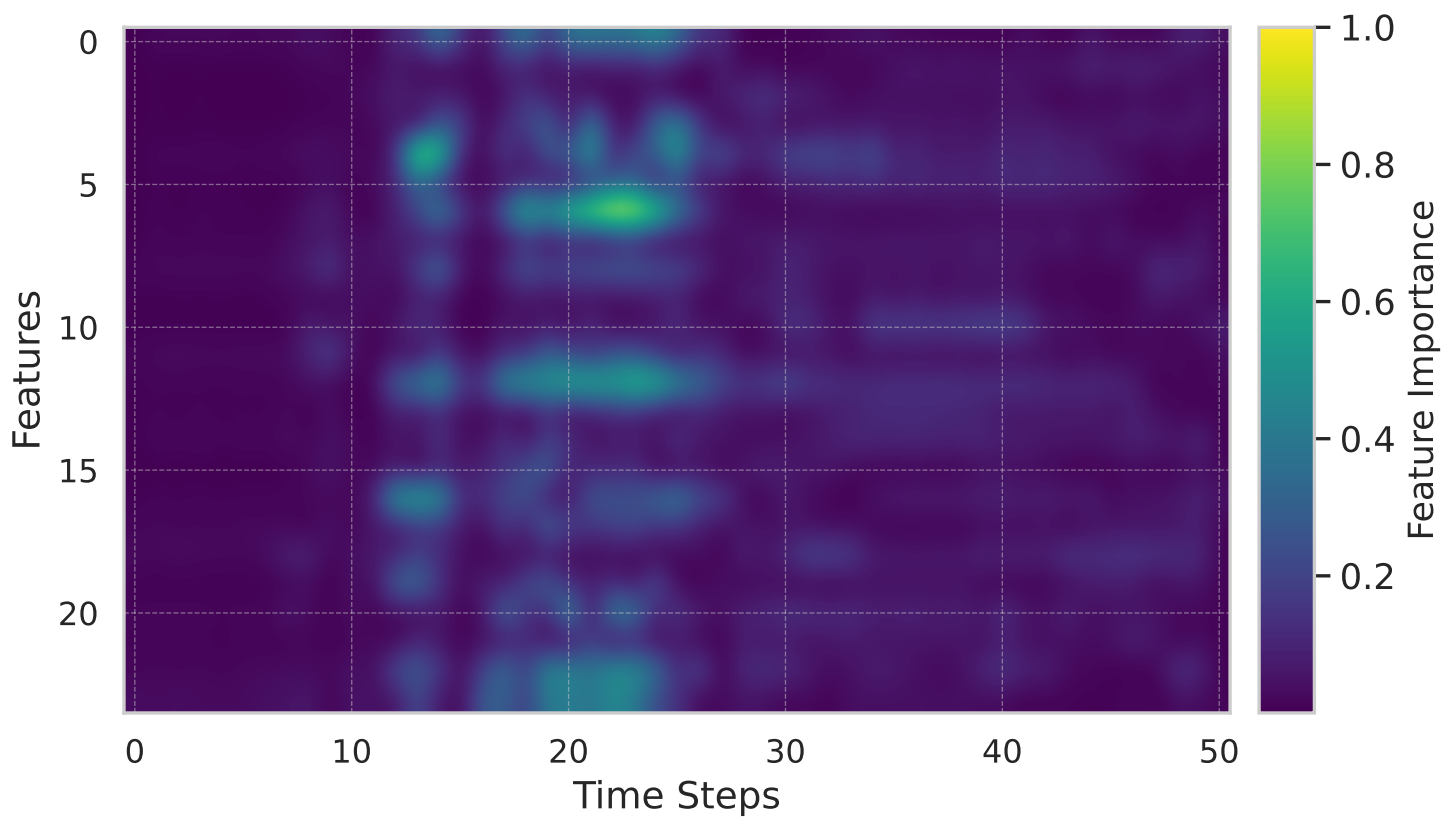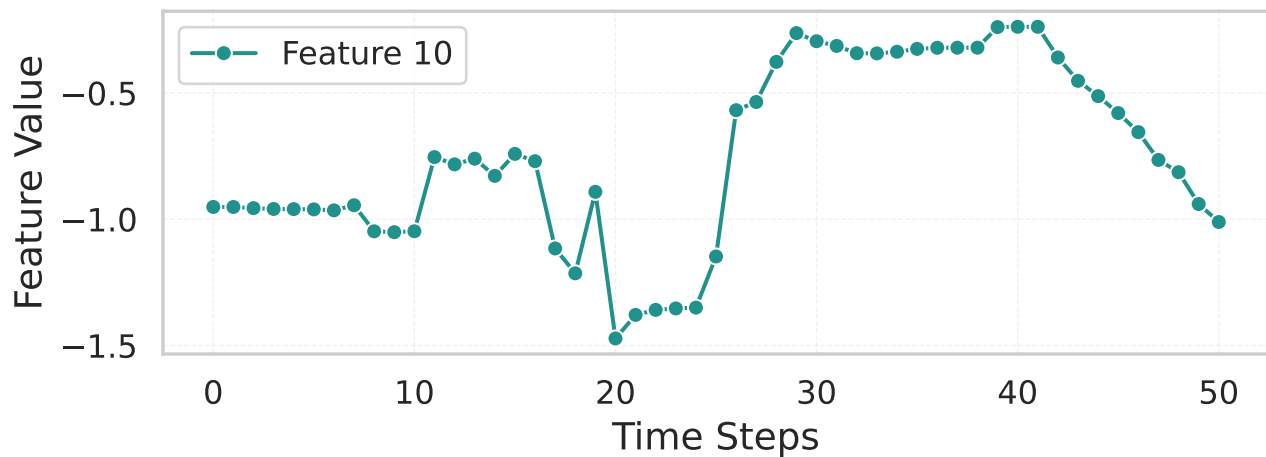

Sample Index: 72

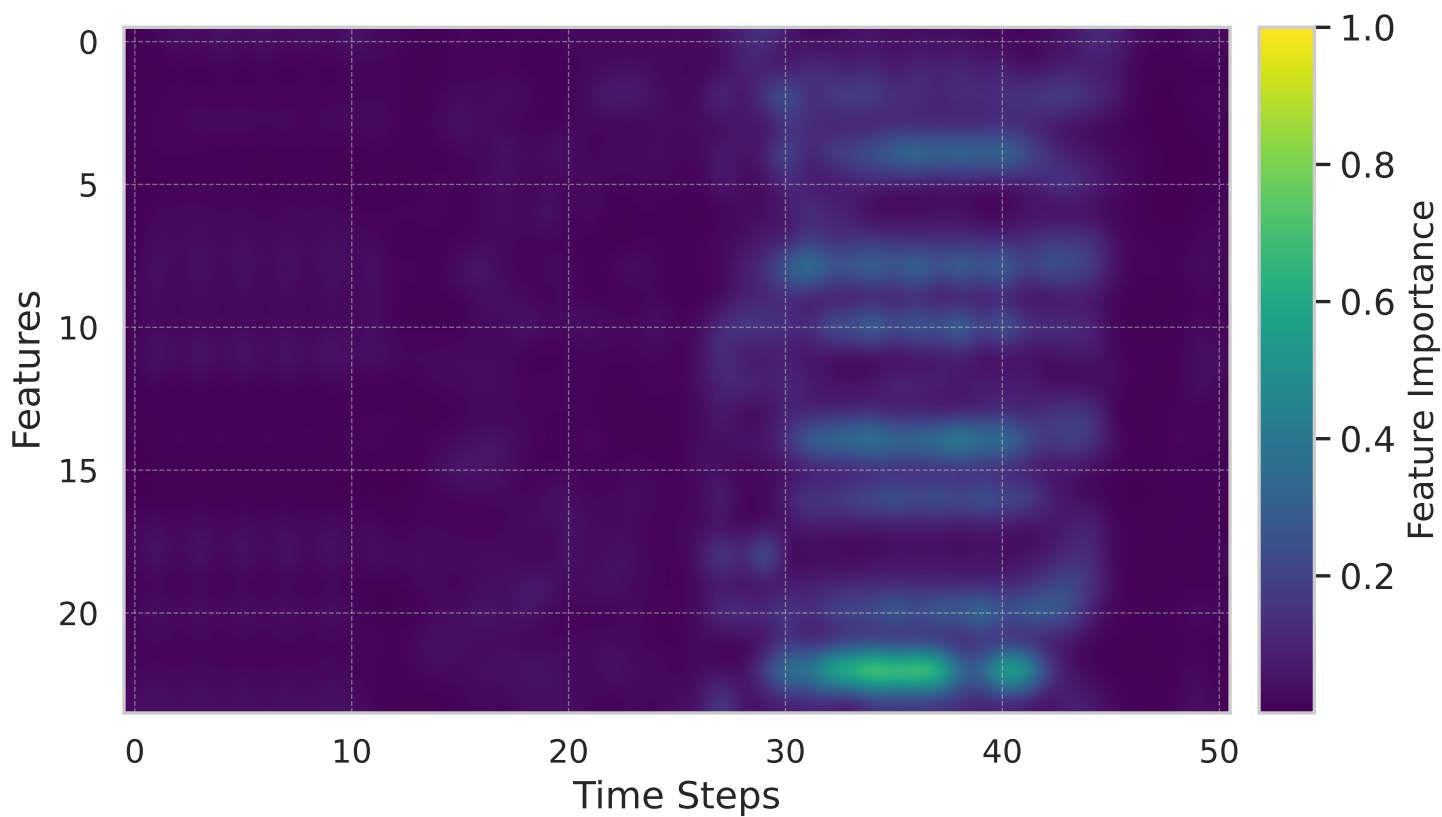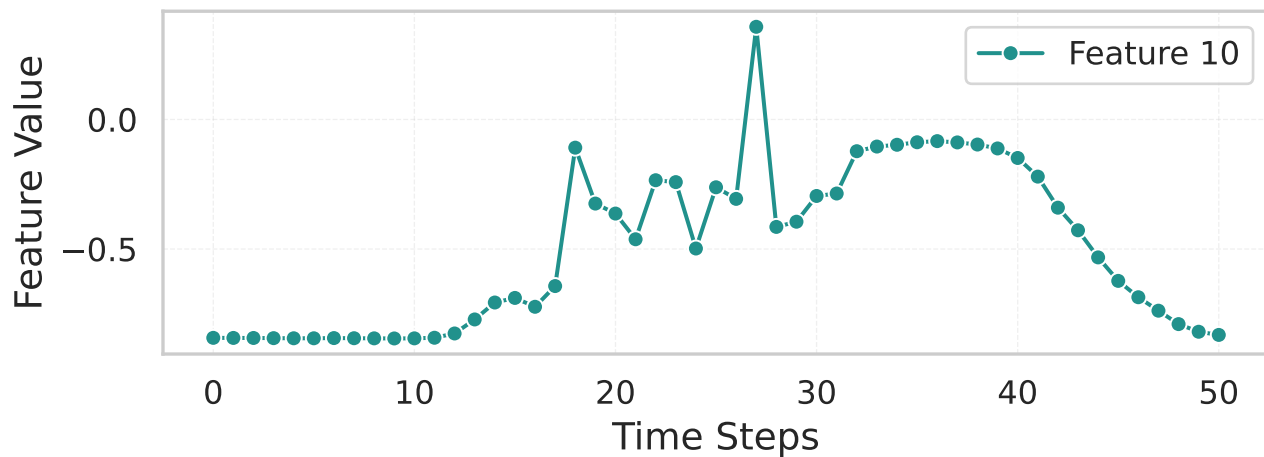

Sample Index: 73

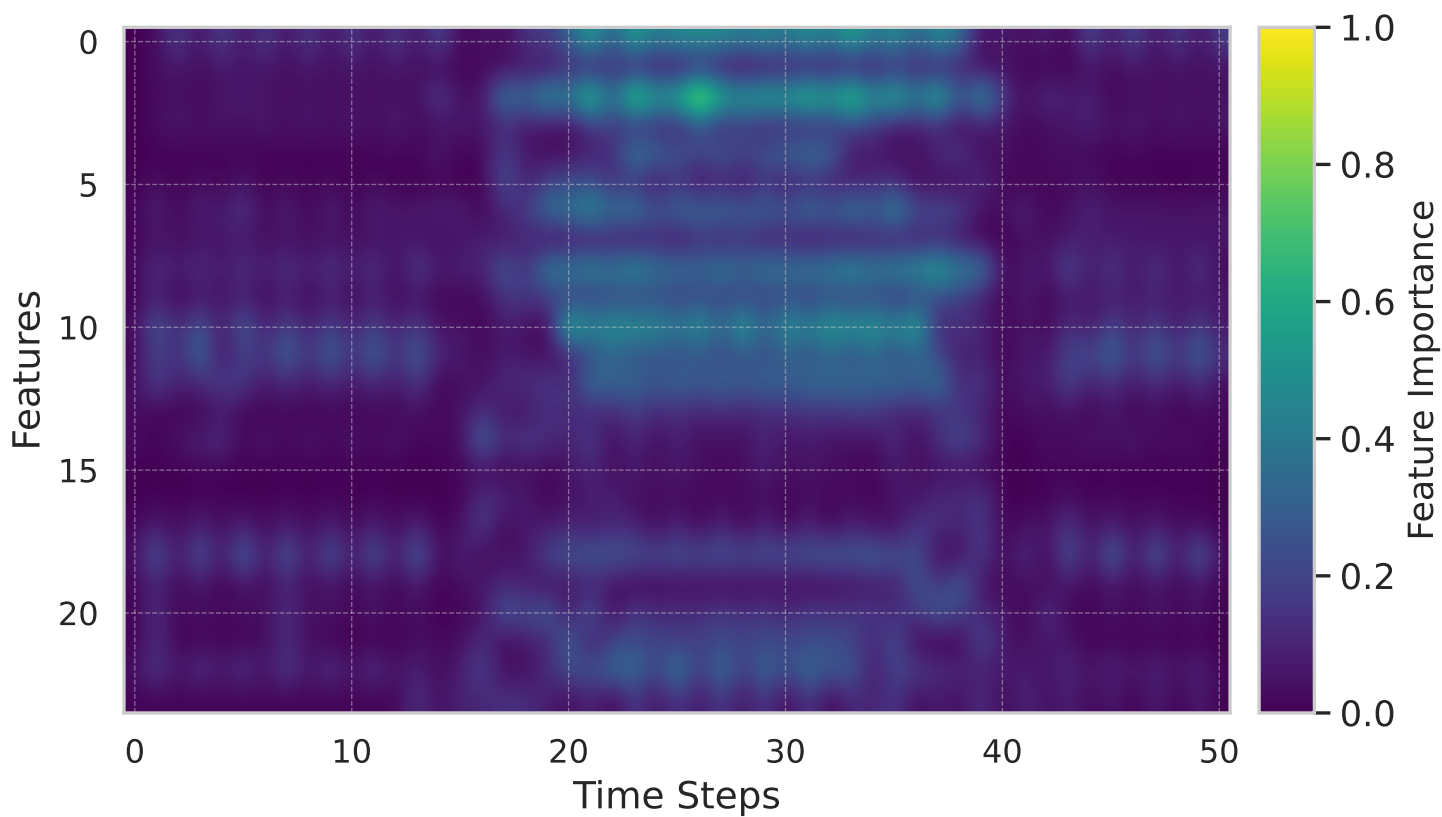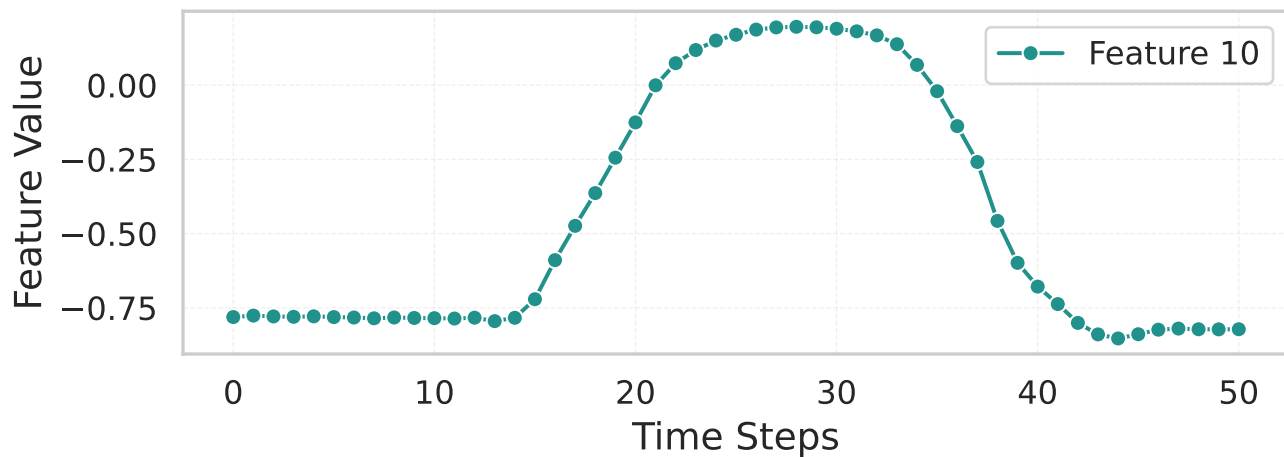

Sample Index: 74

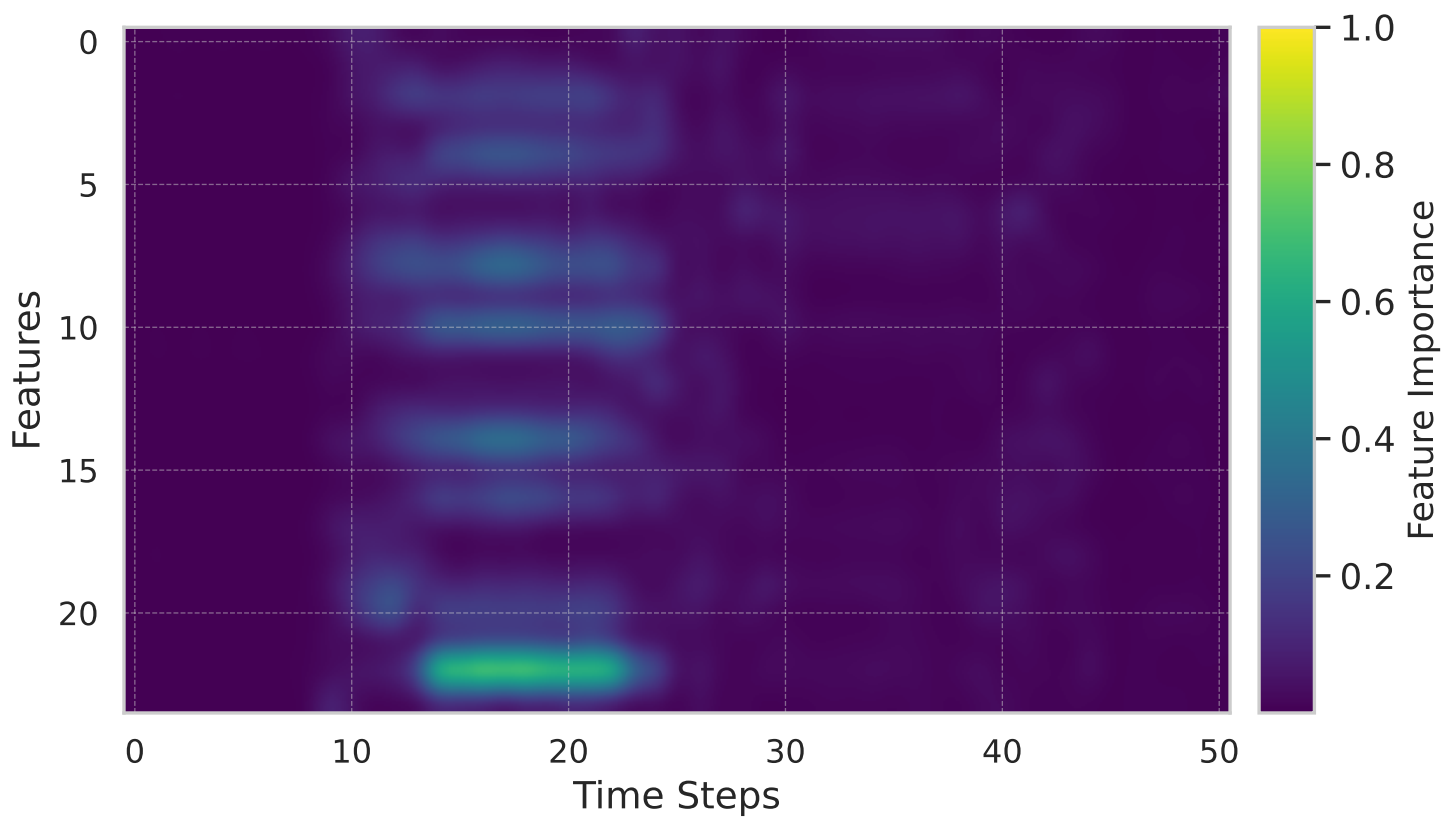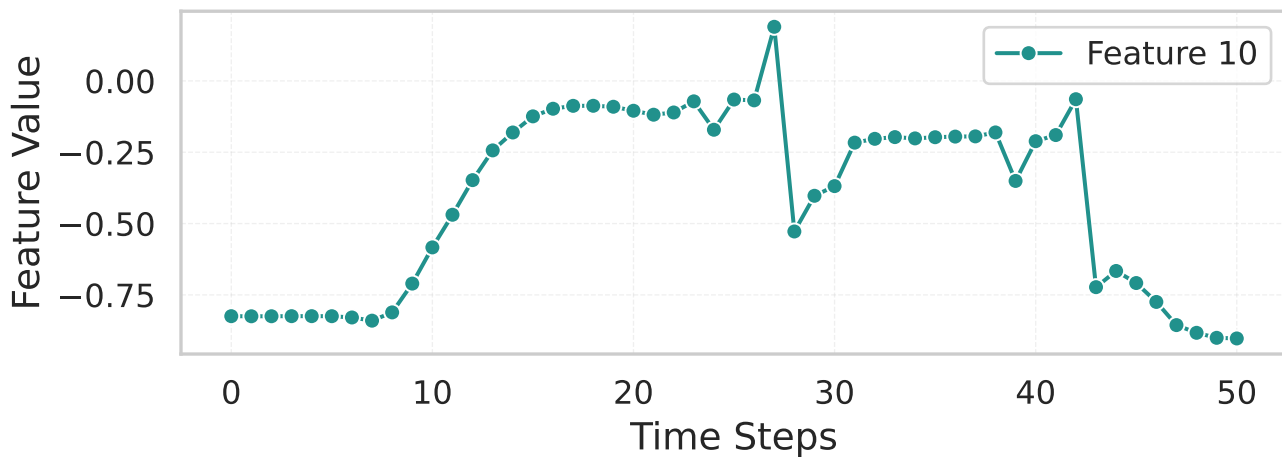

Sample Index: 75

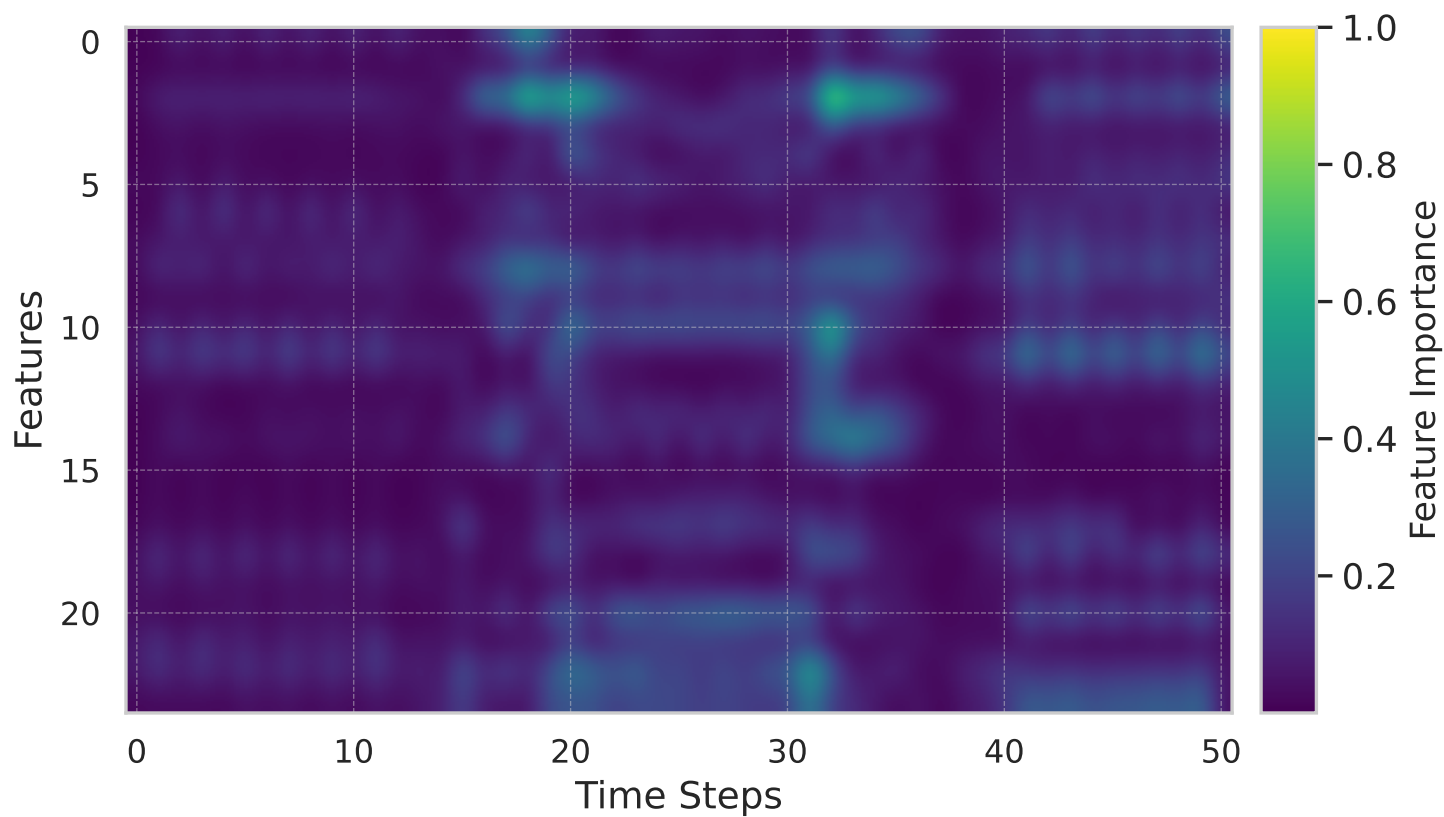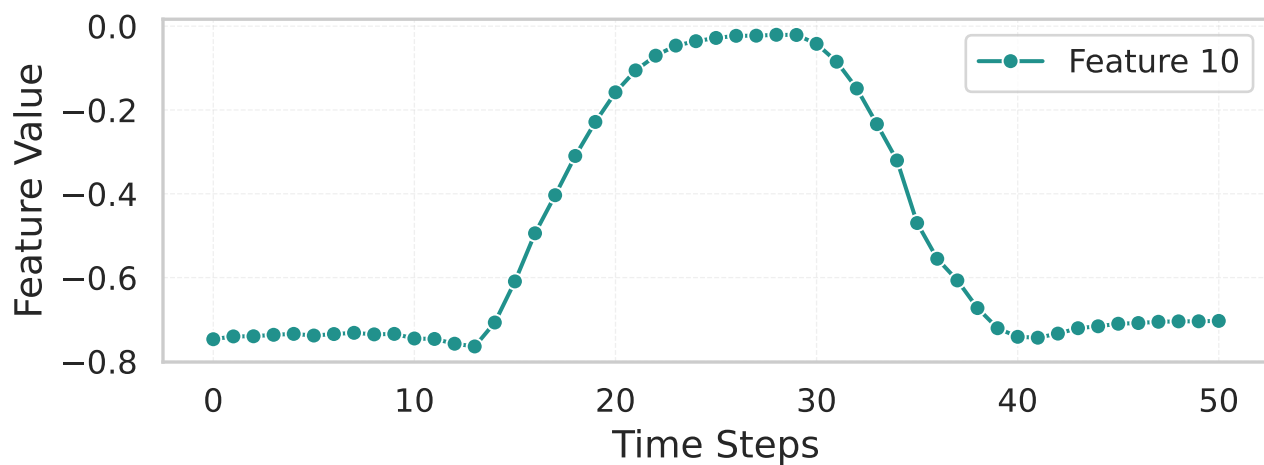



Sample Index: 76

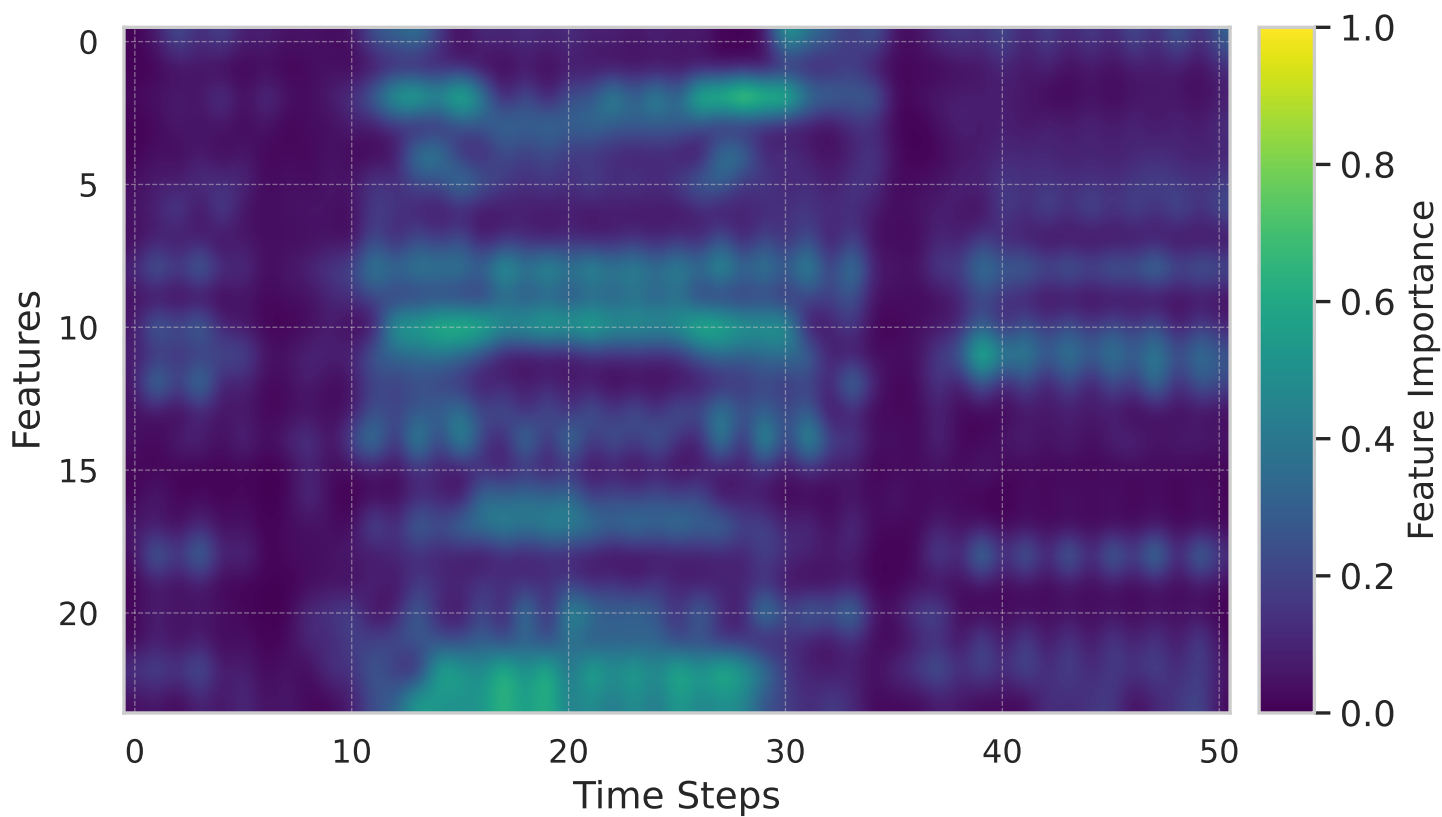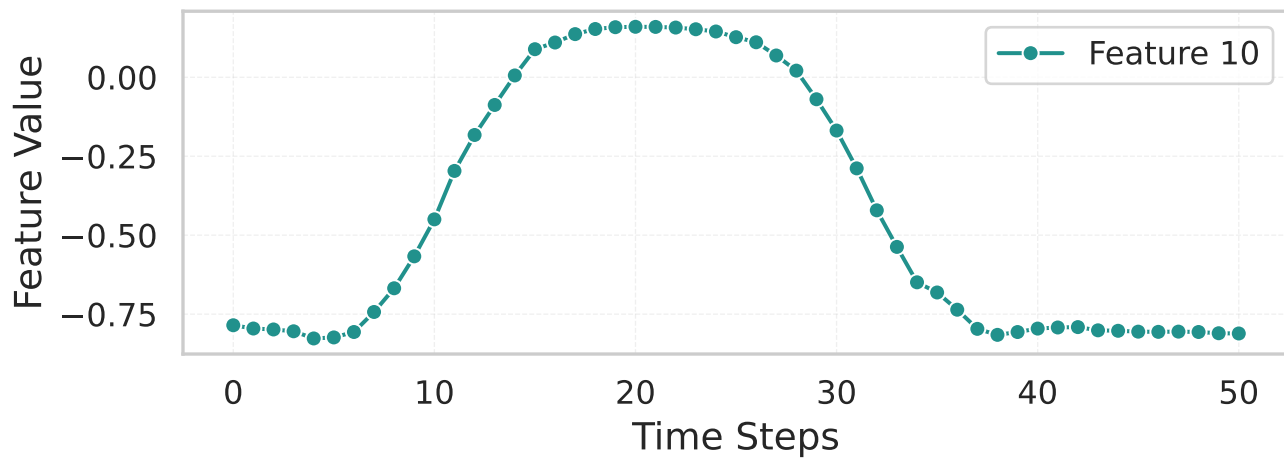

Sample Index: 77

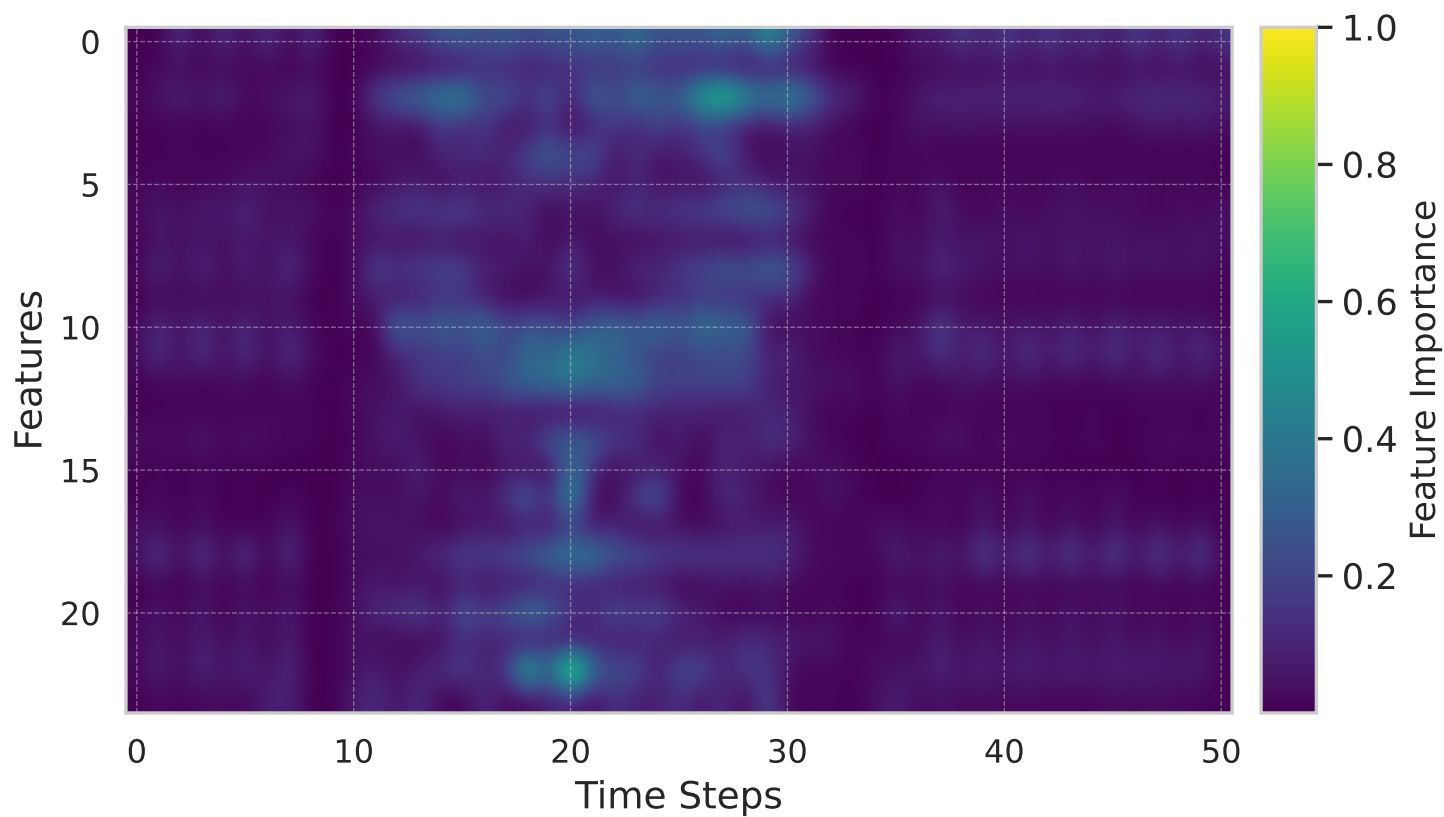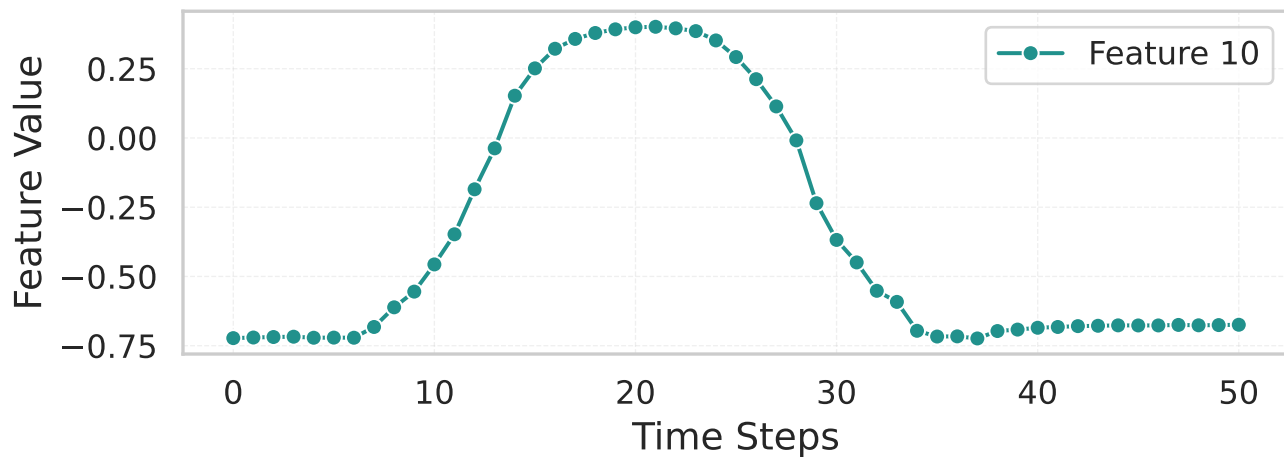

Sample Index: 78

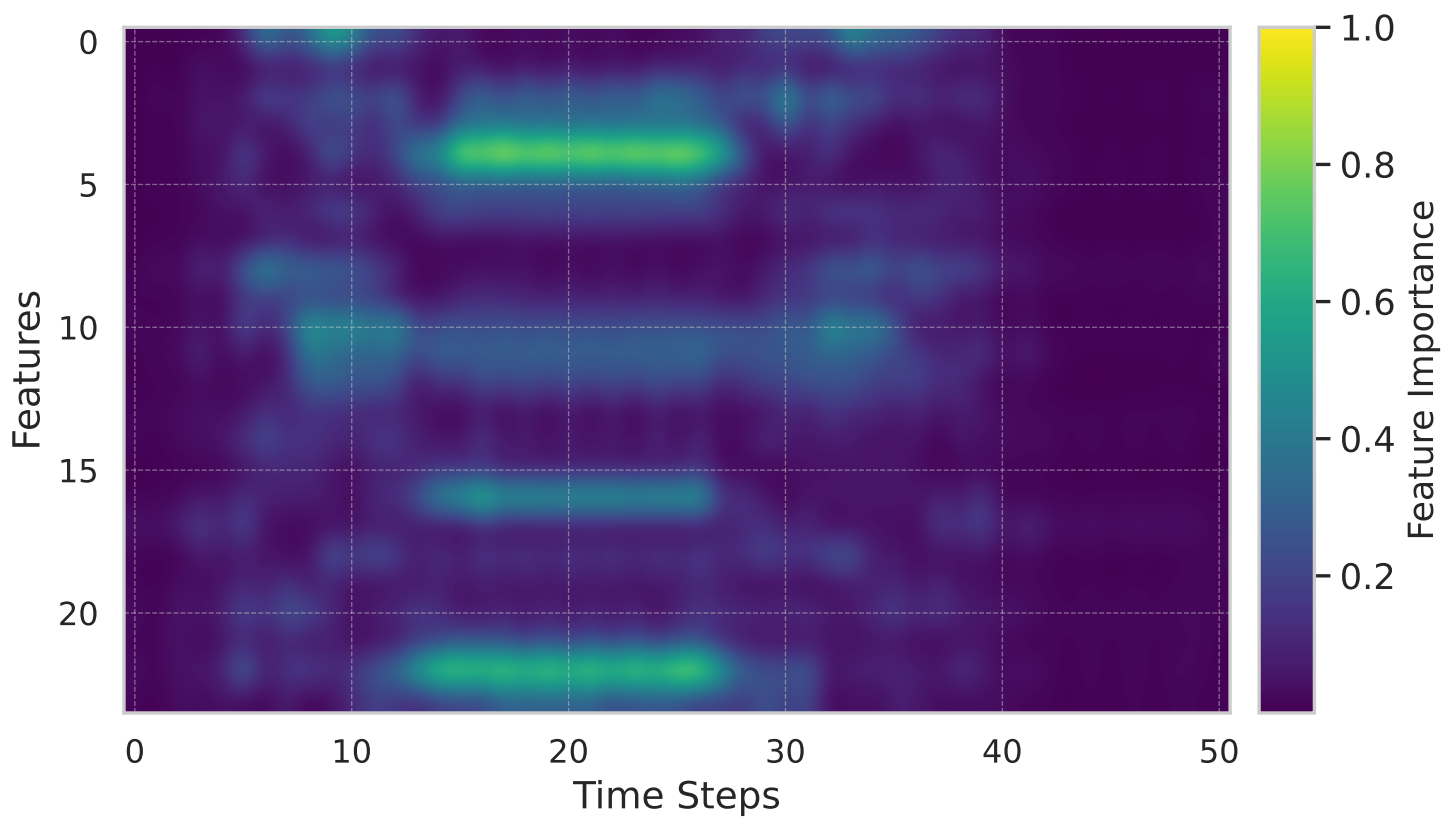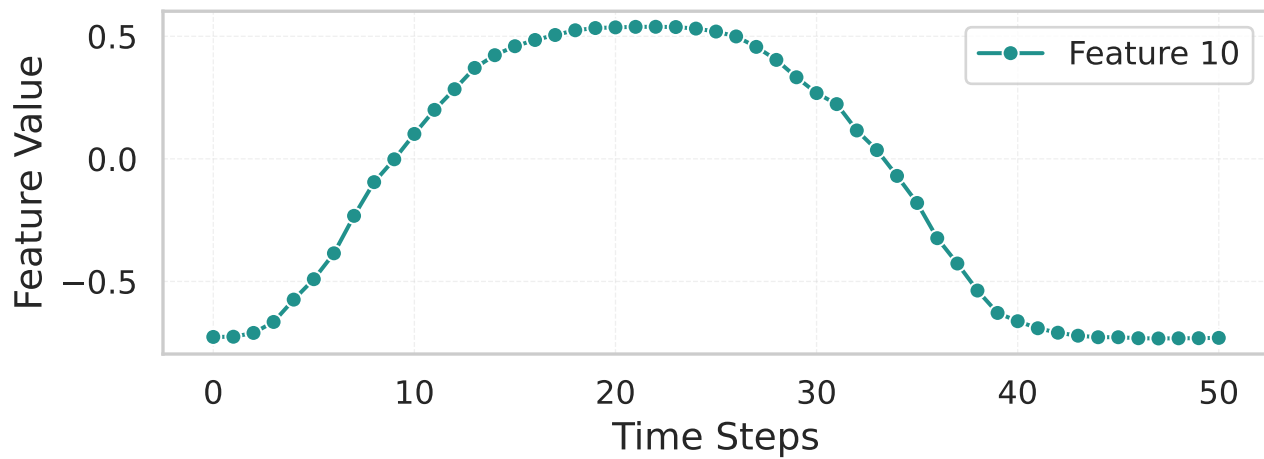

Sample Index: 79

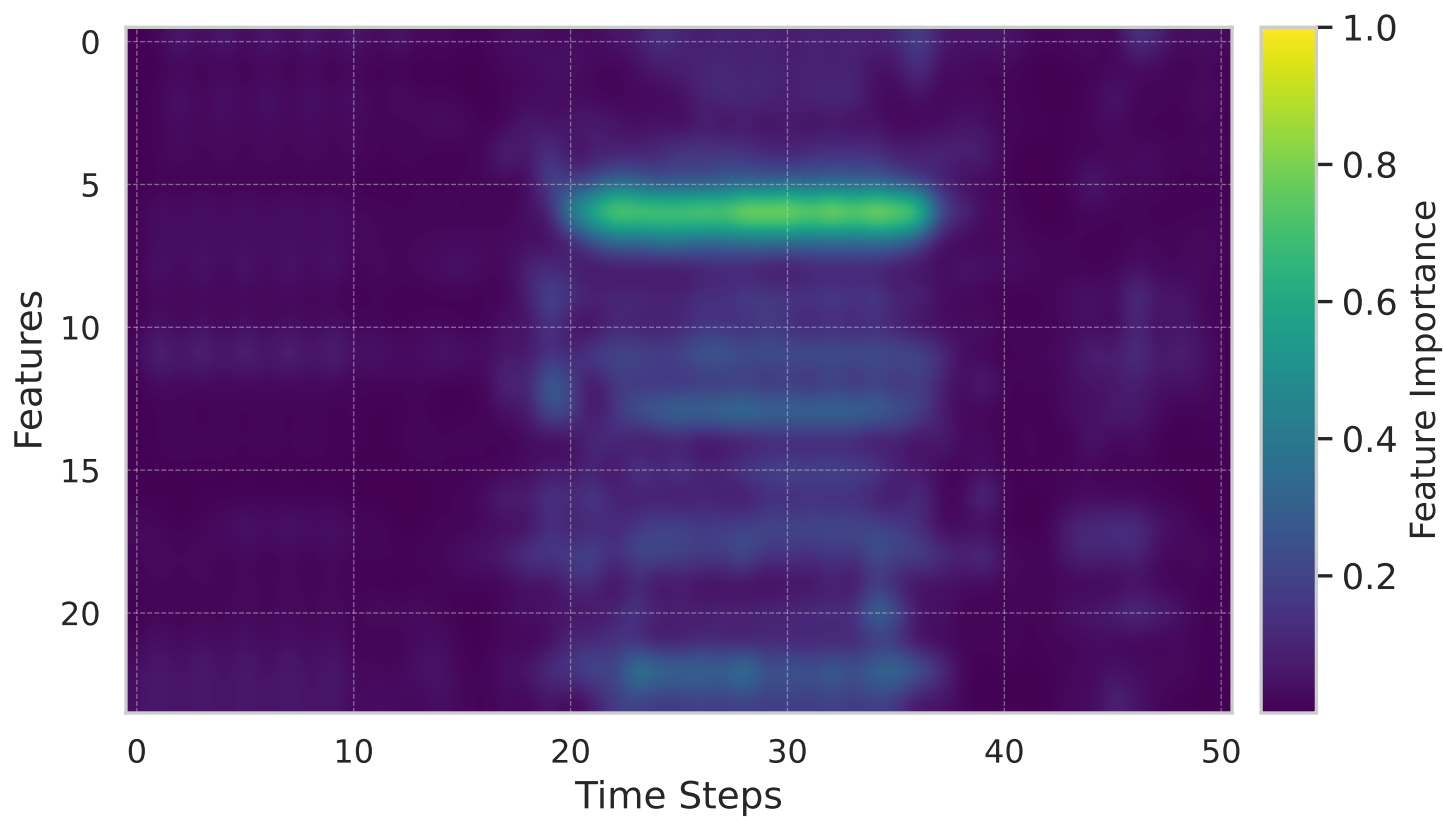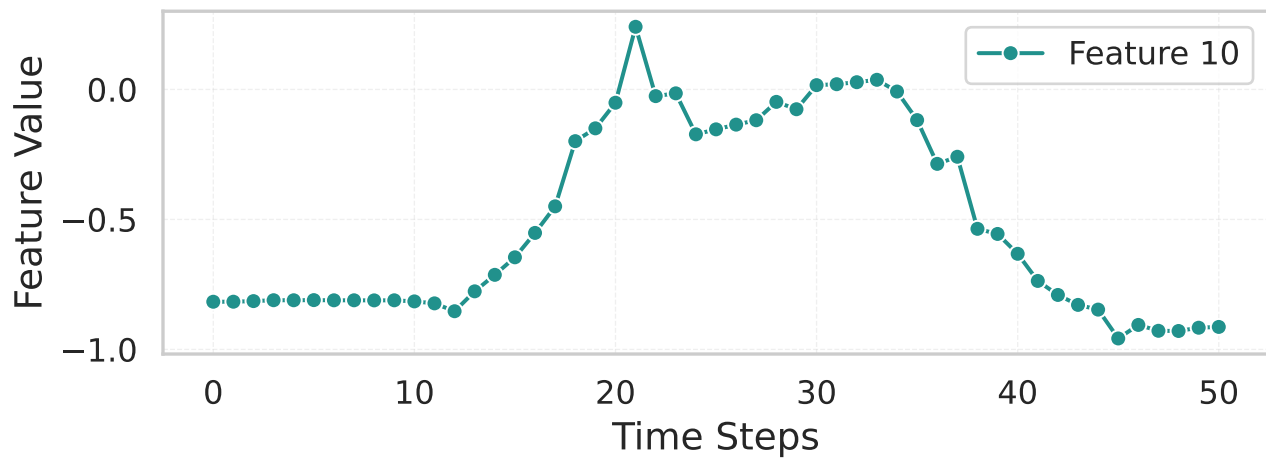

Sample Index: 80

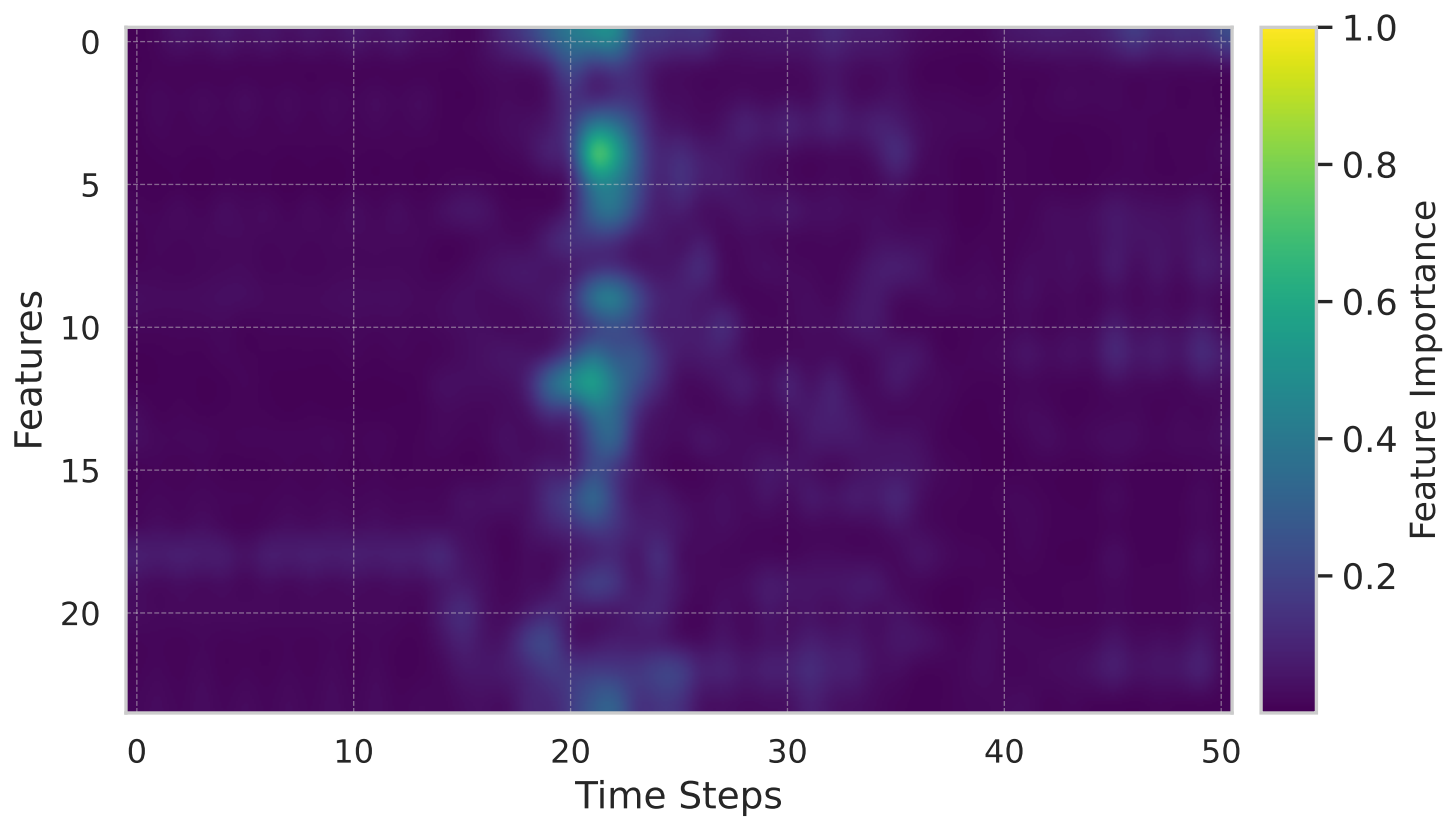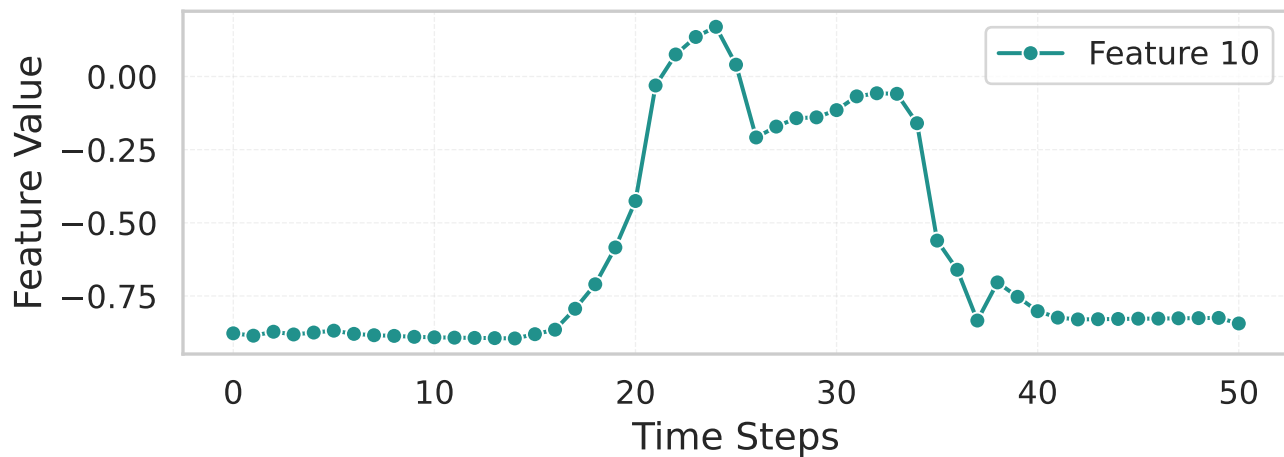

Sample Index: 81

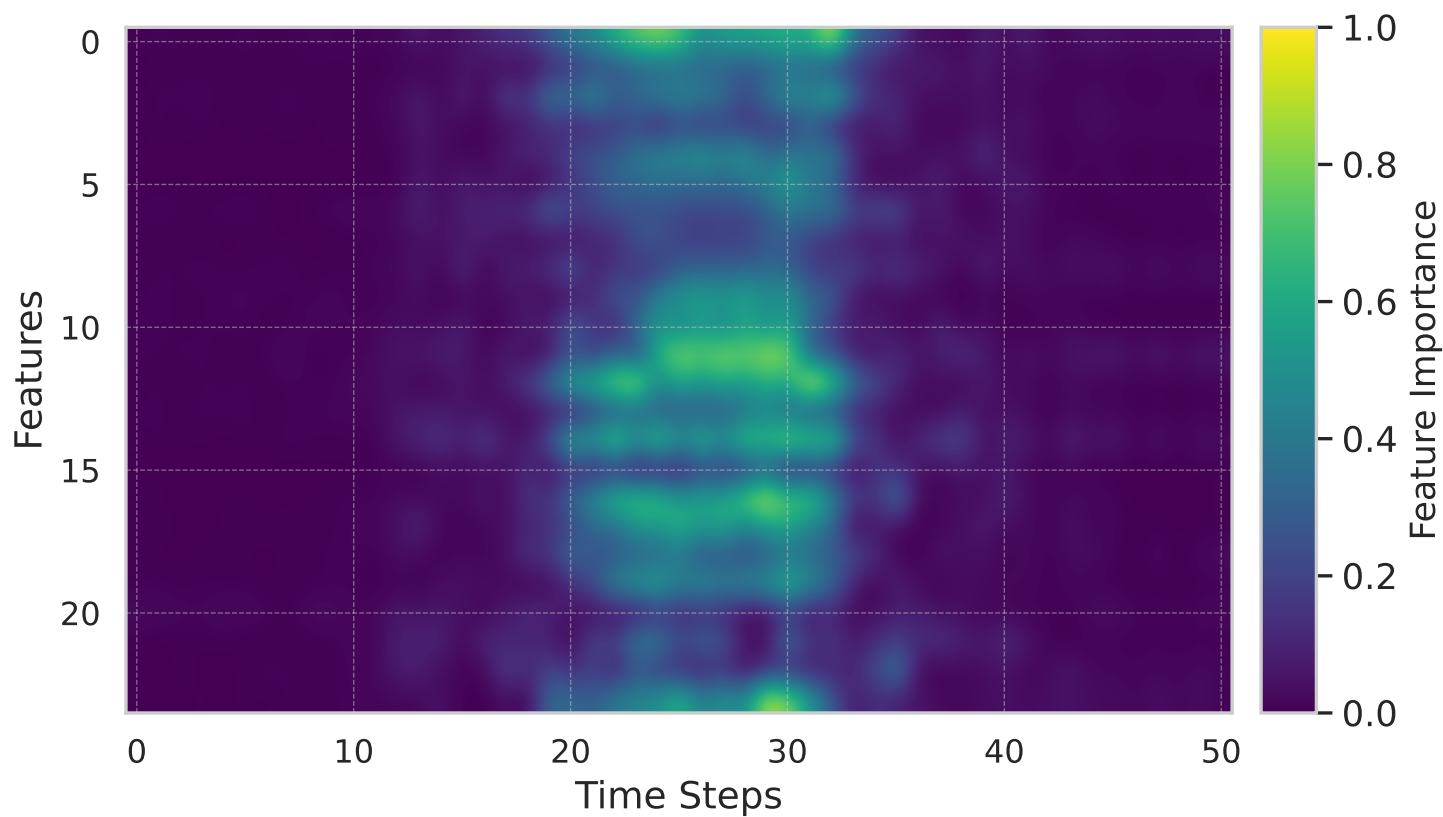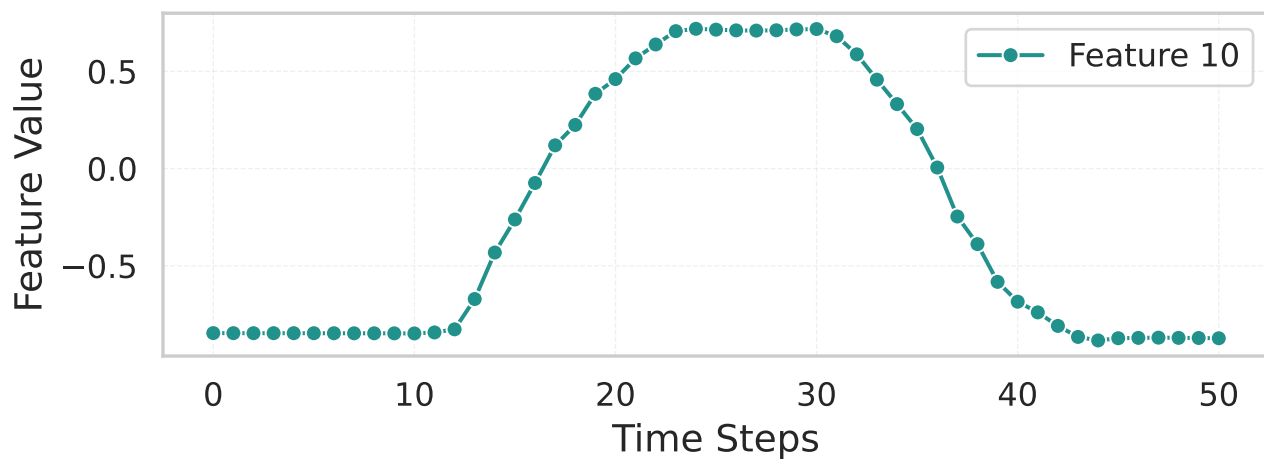

Sample Index: 82

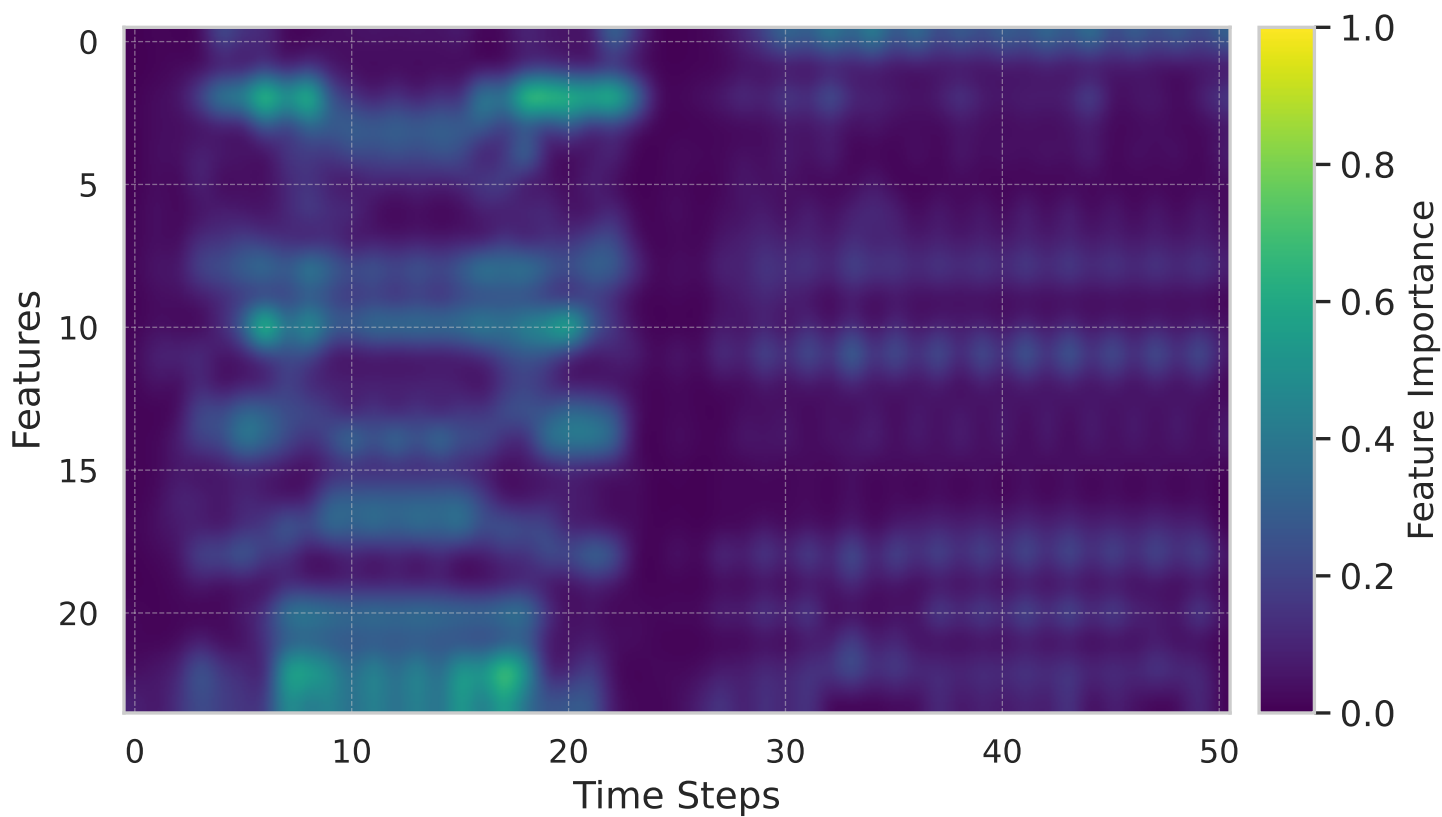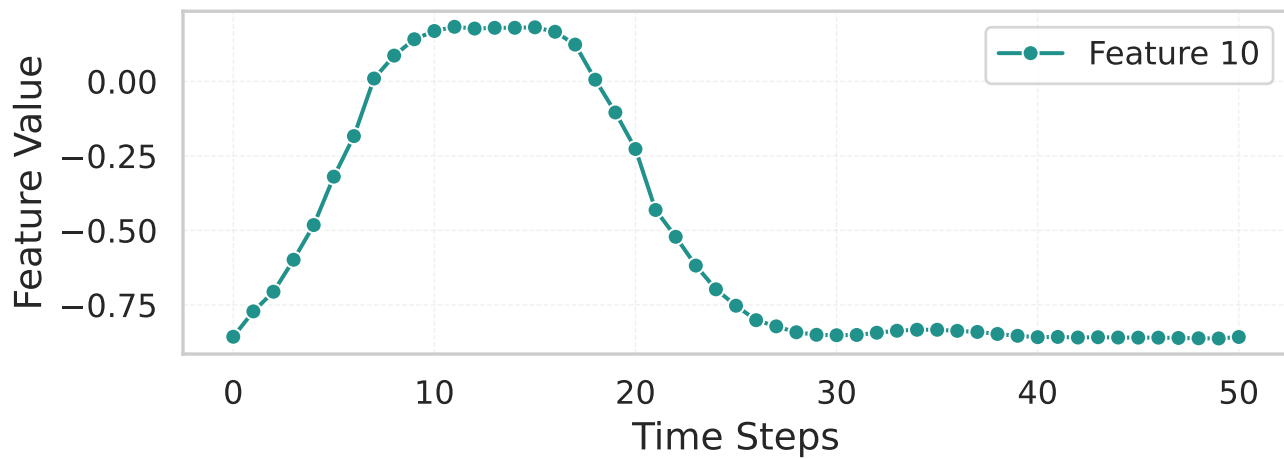

Sample Index: 83

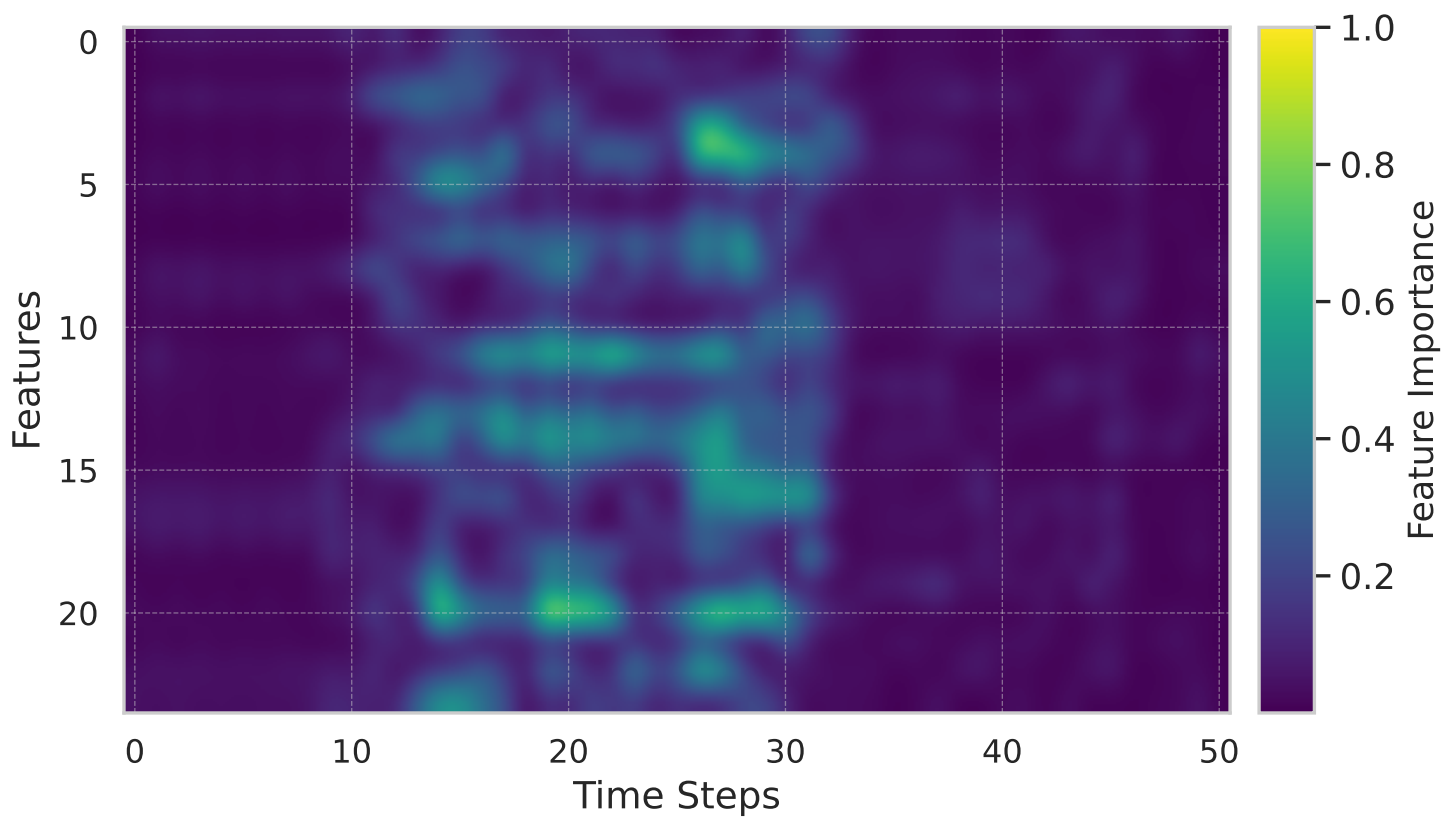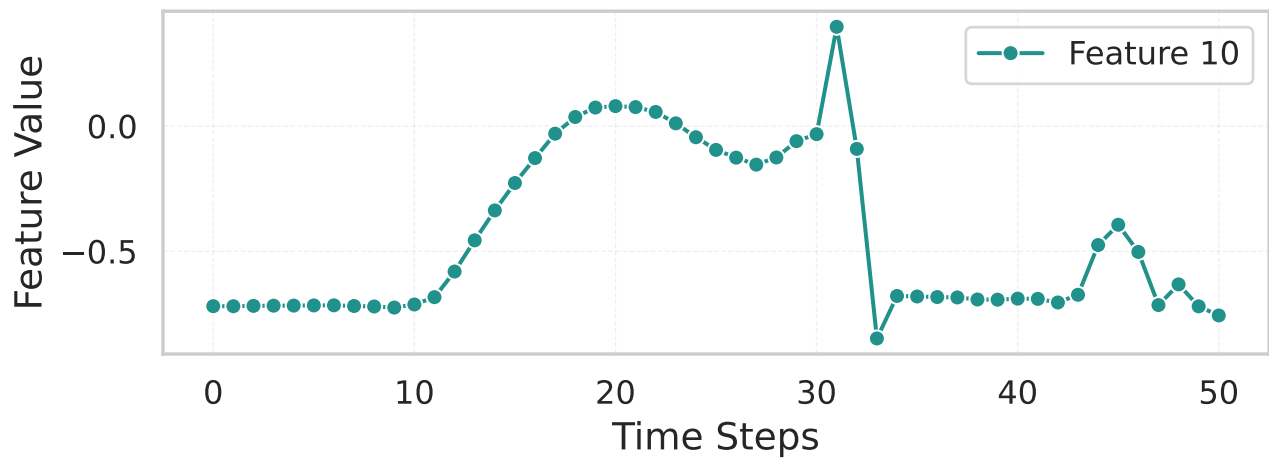



Sample Index: 84

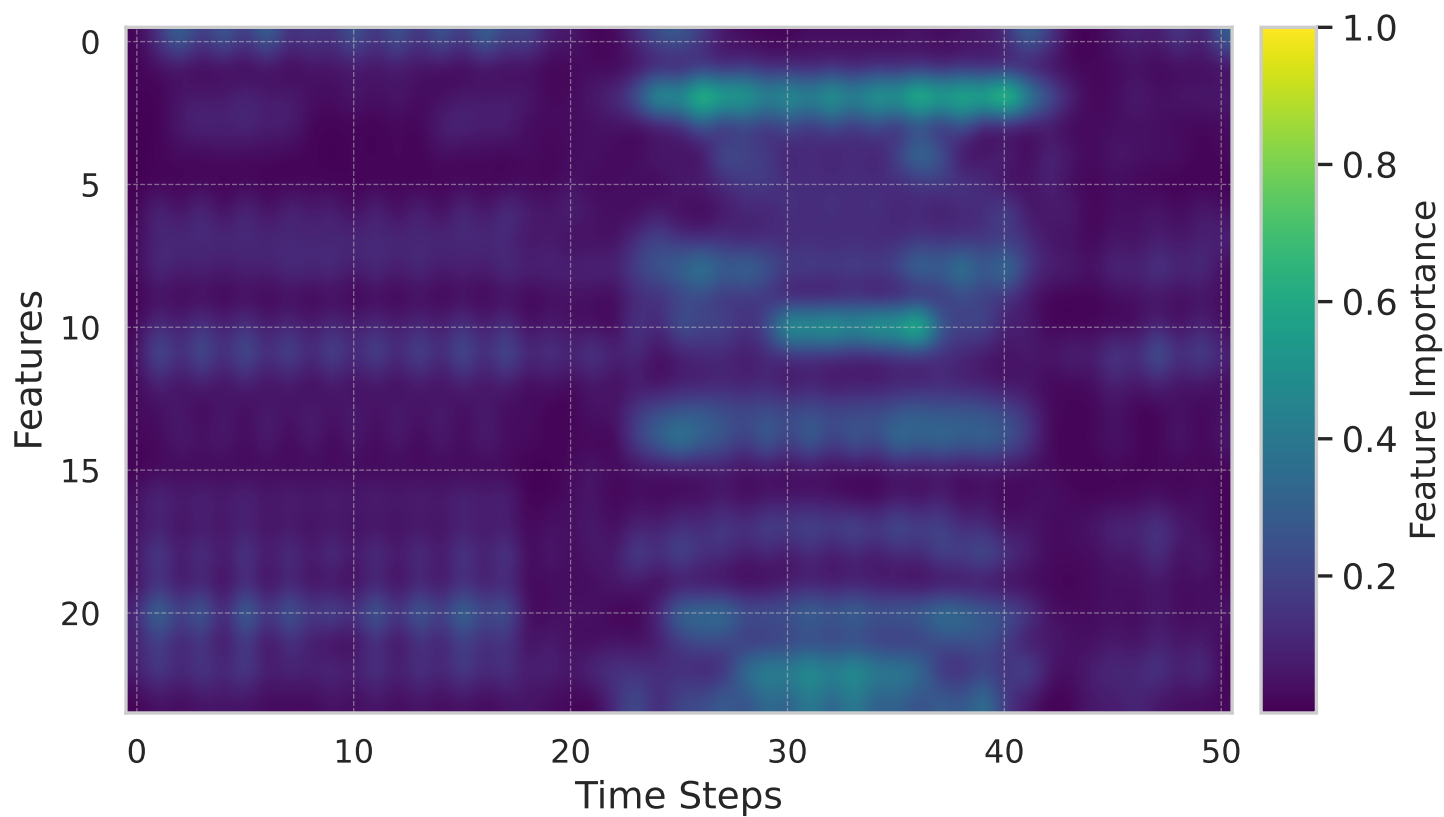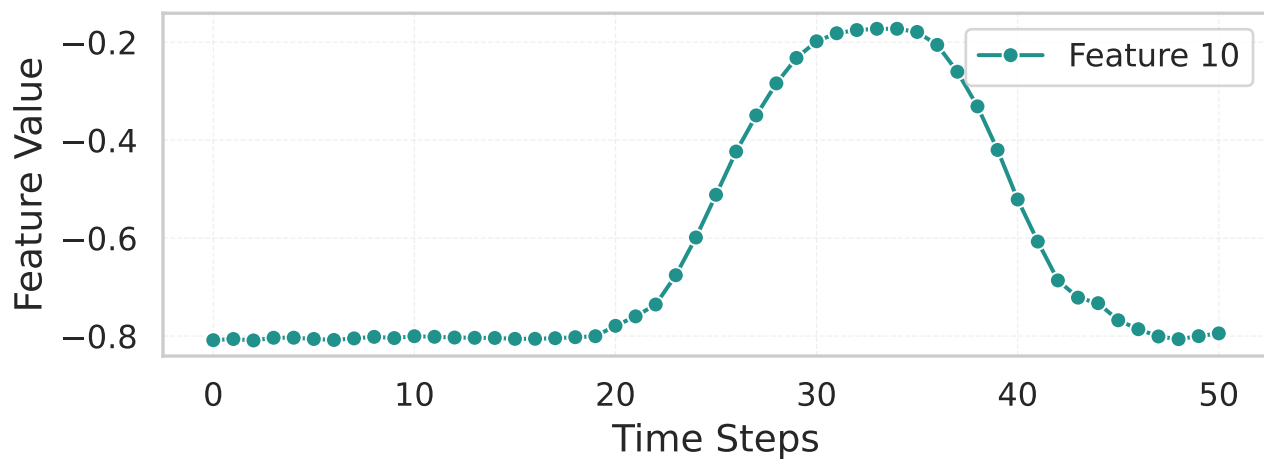

Sample Index: 85

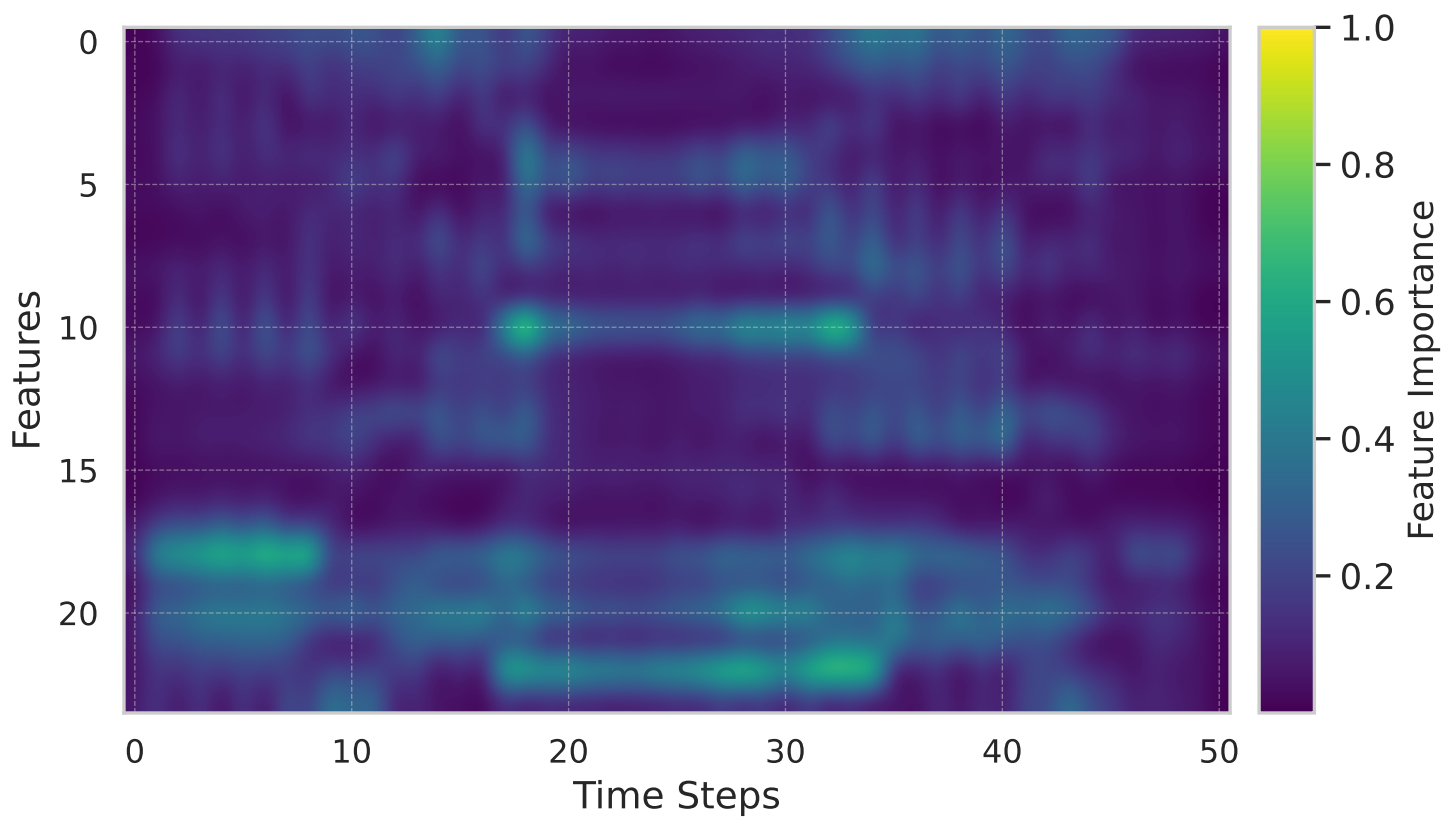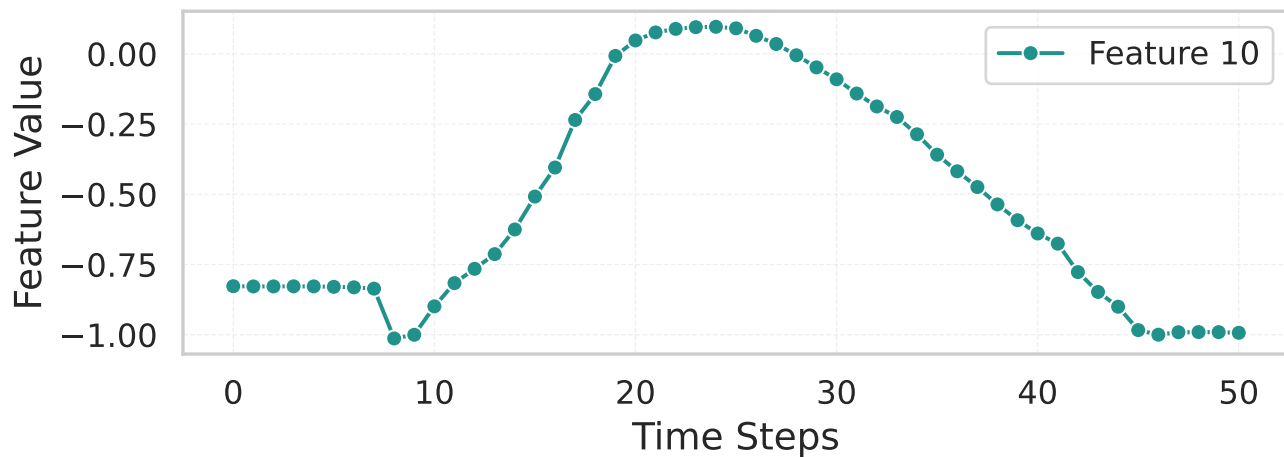

Sample Index: 86

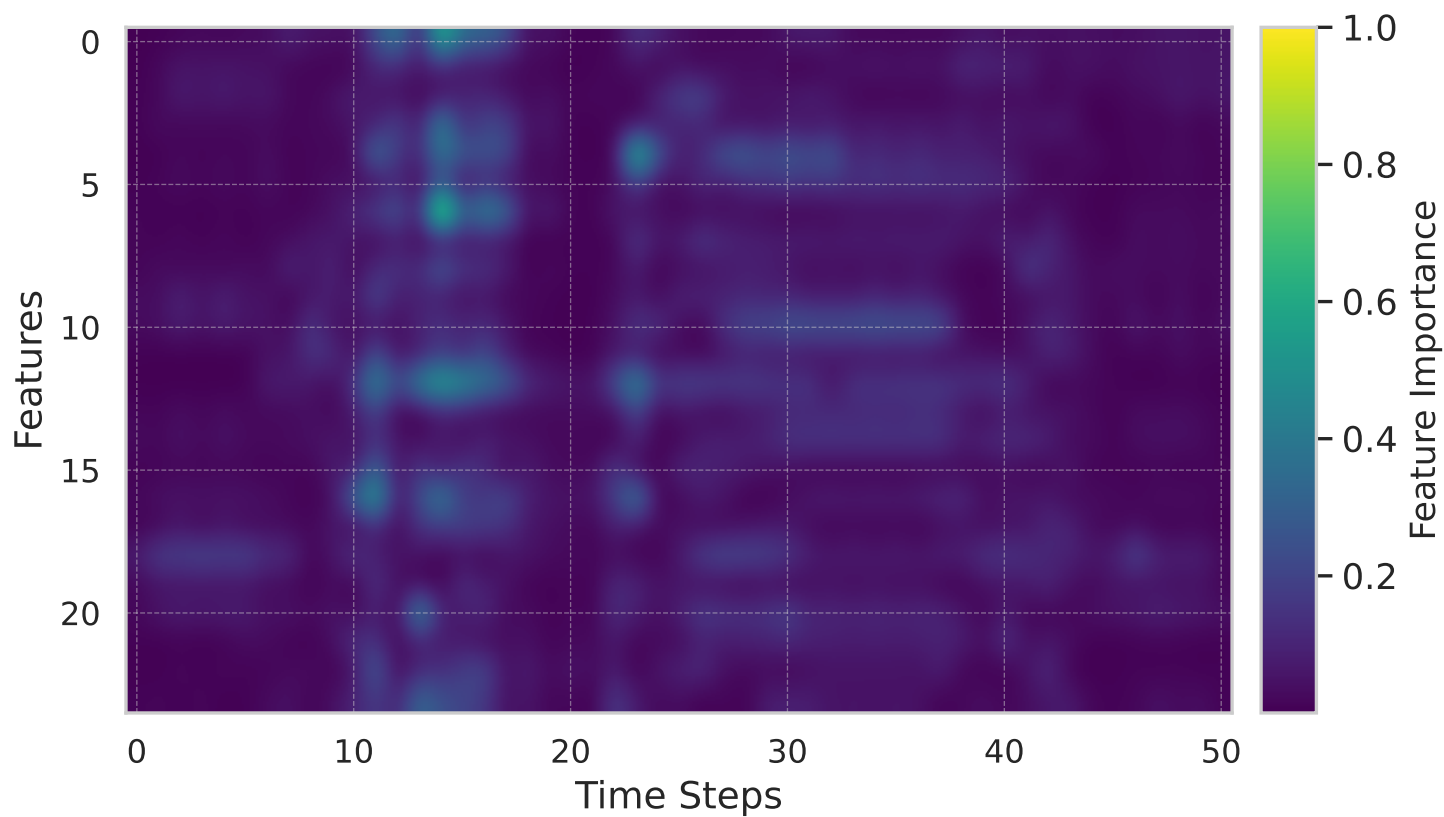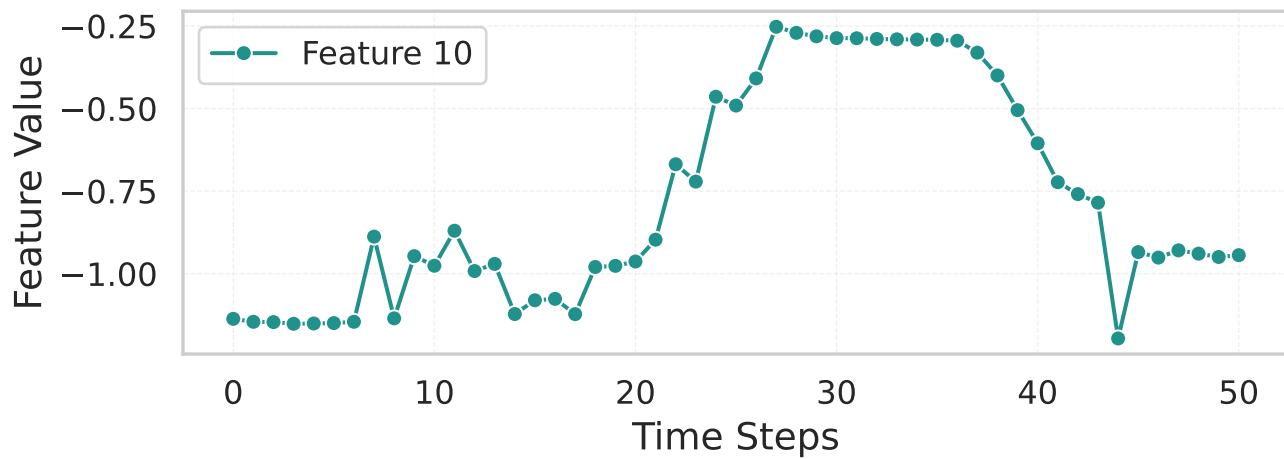

Sample Index: 87

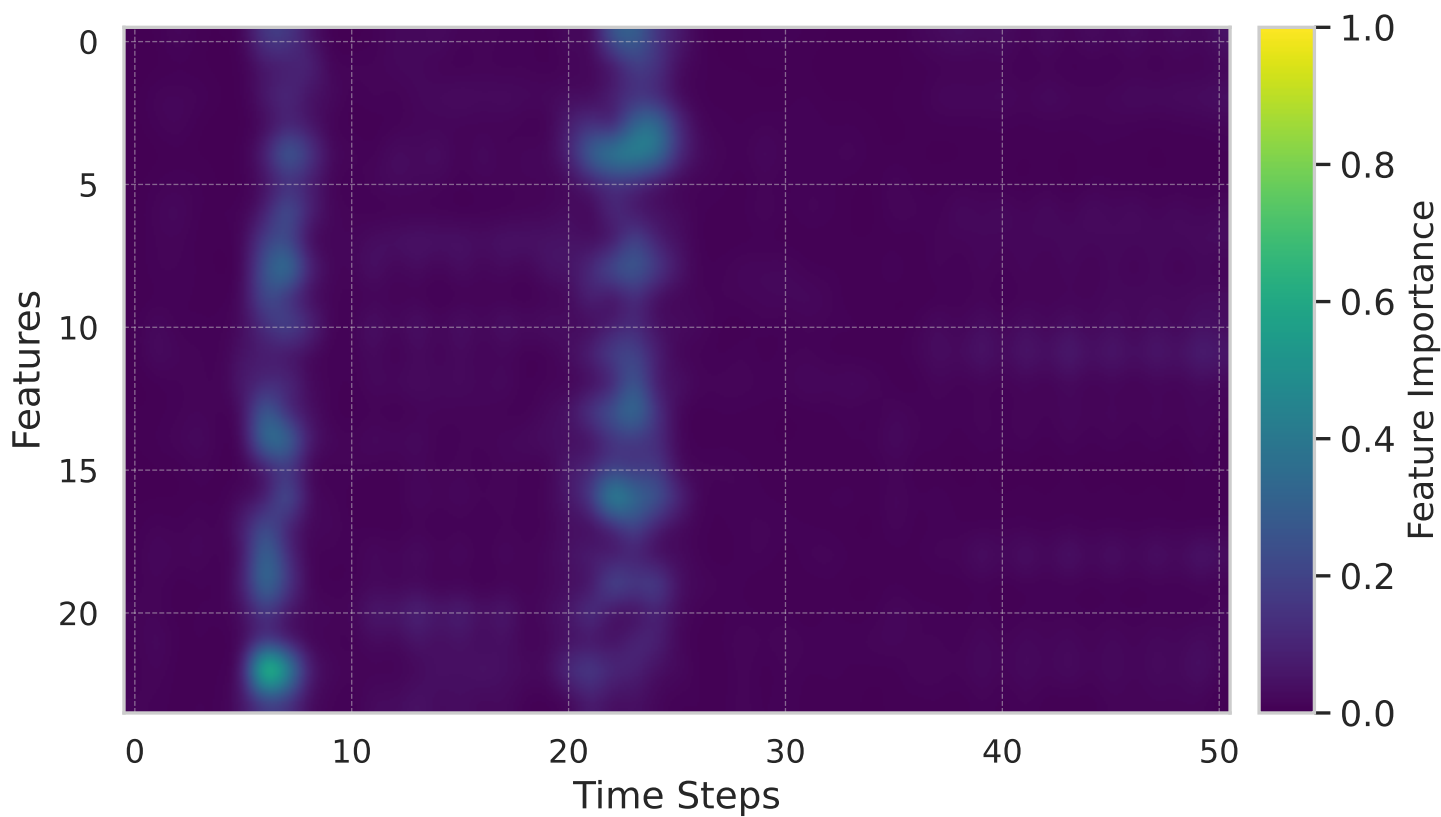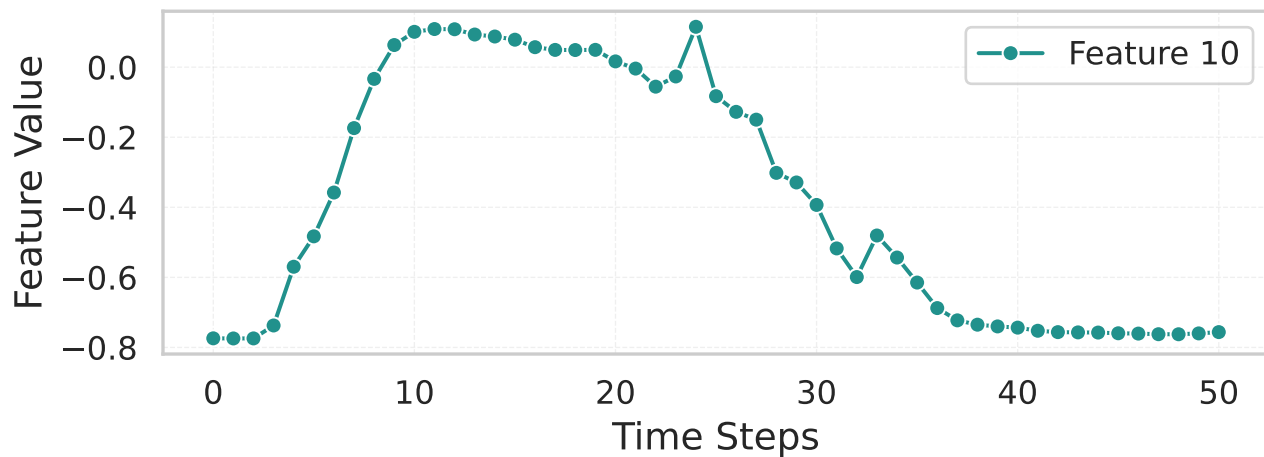

Sample Index: 88

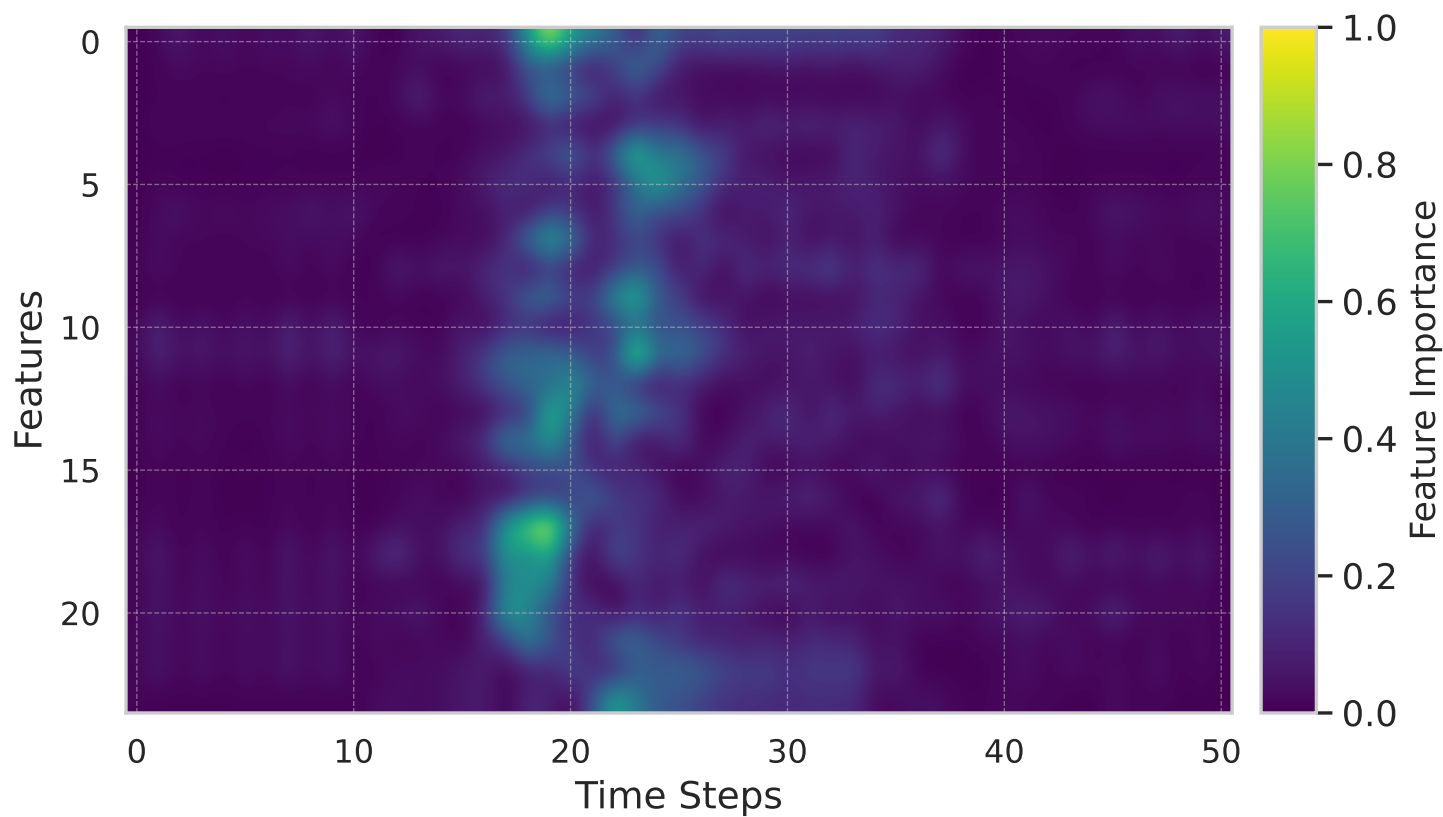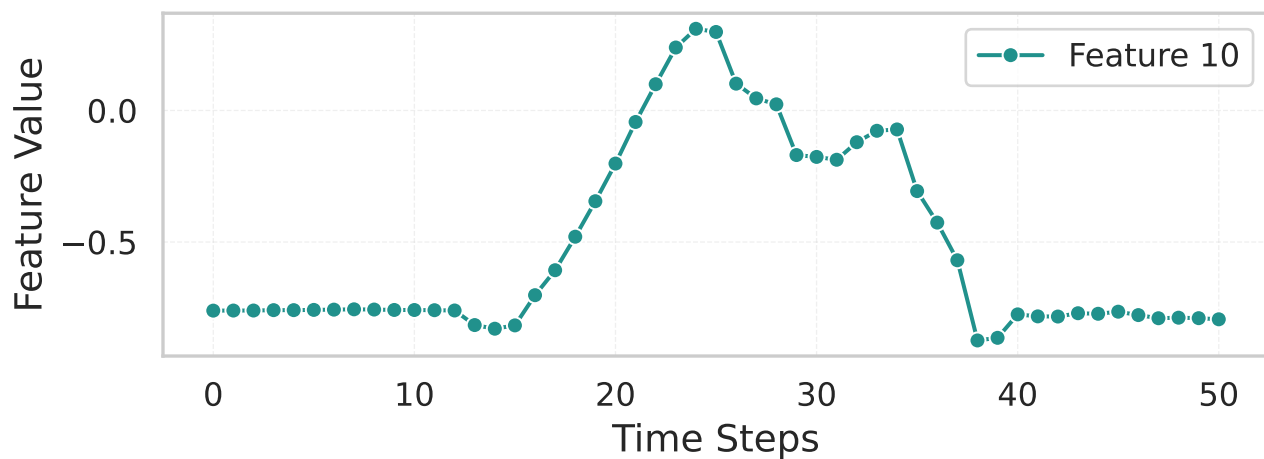

Sample Index: 89

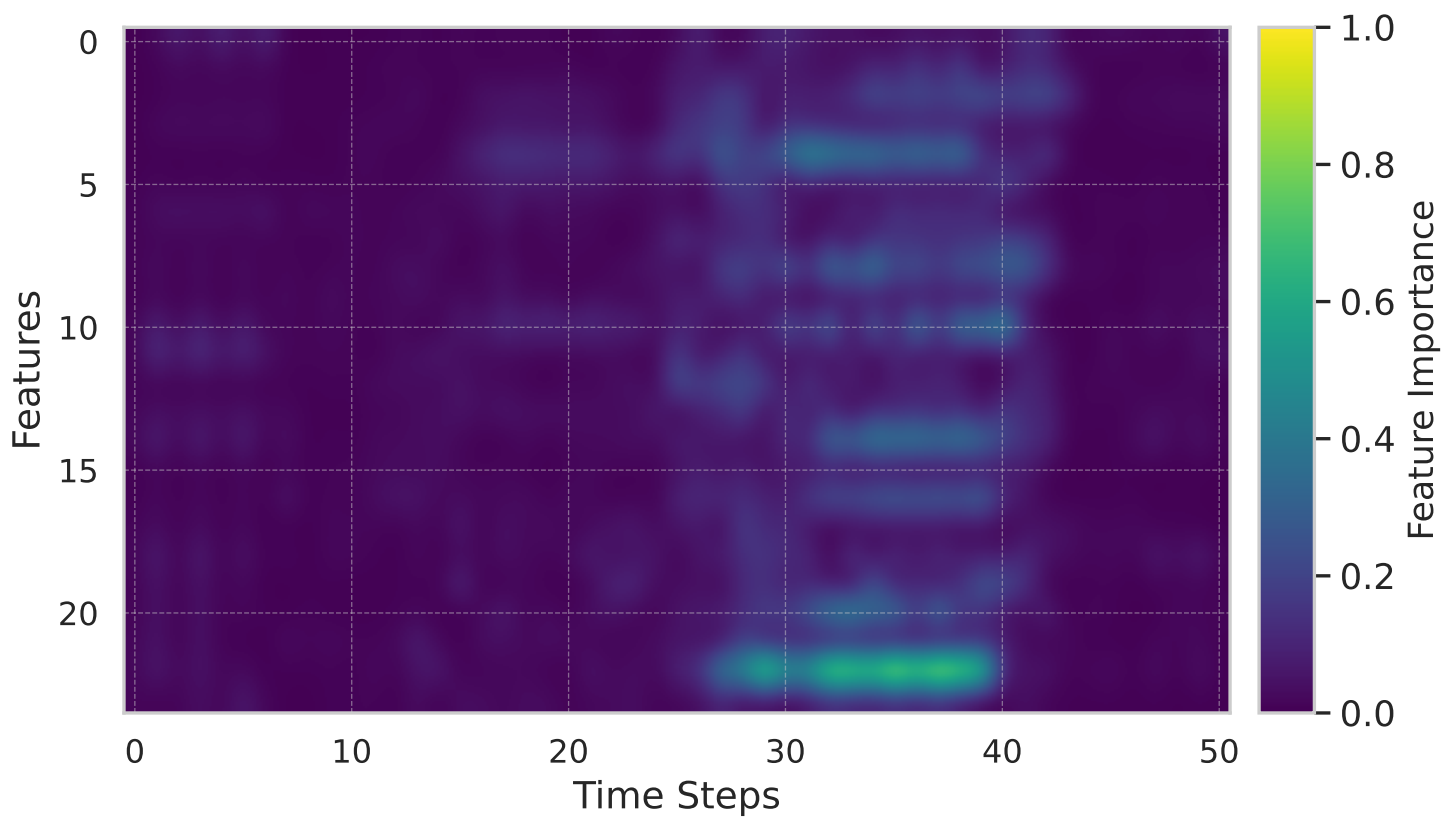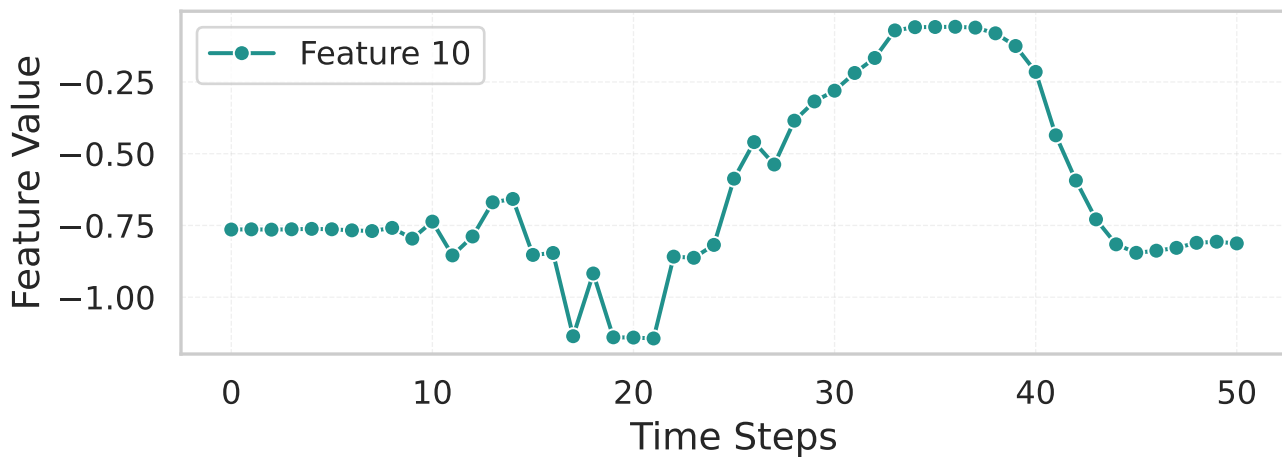

Sample Index: 90

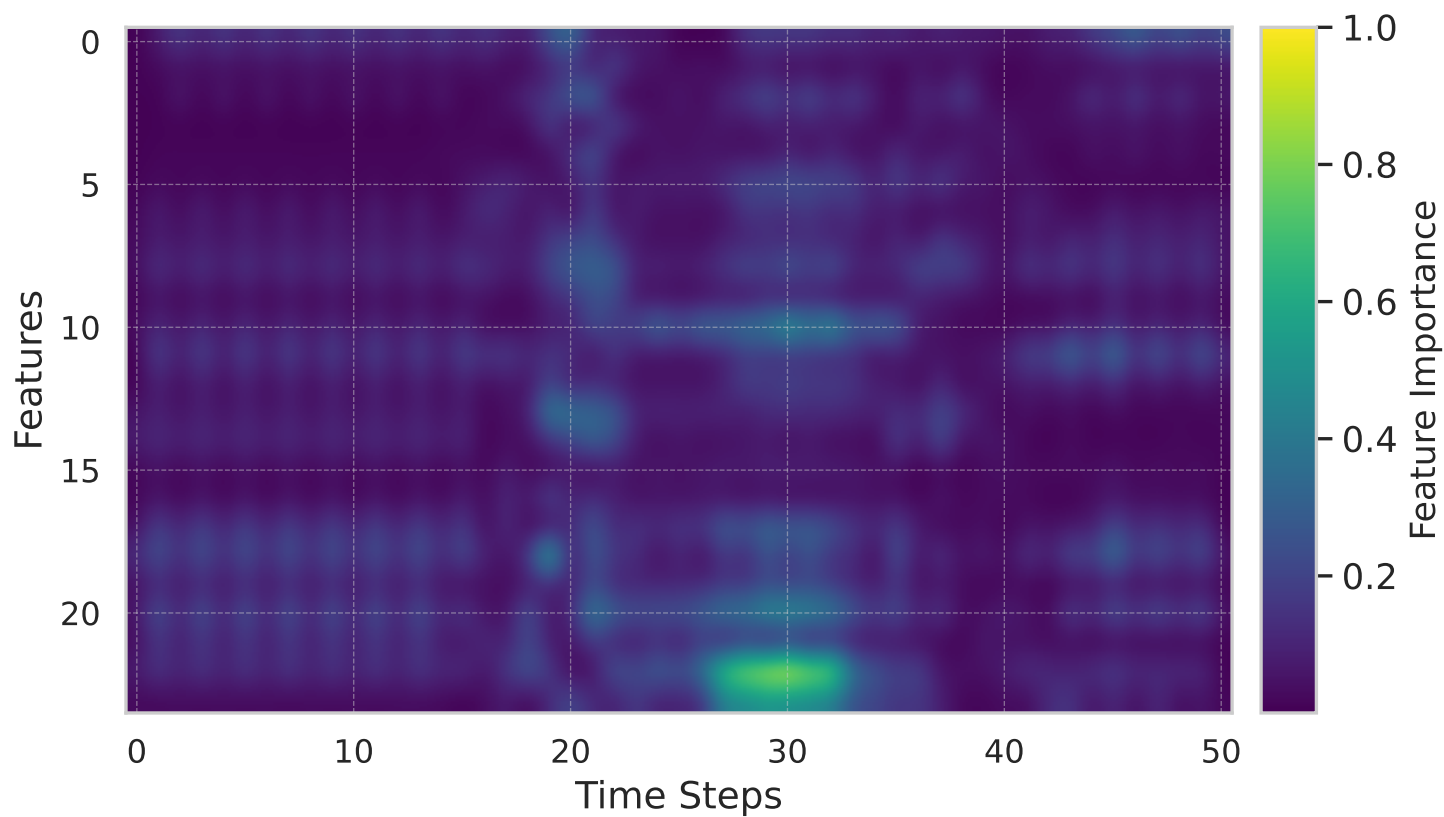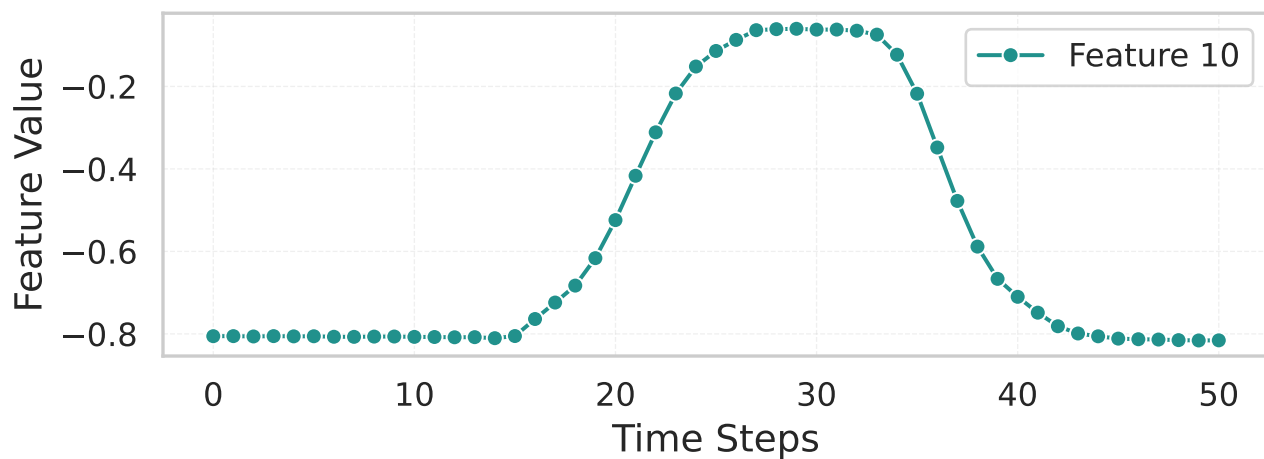

Sample Index: 91

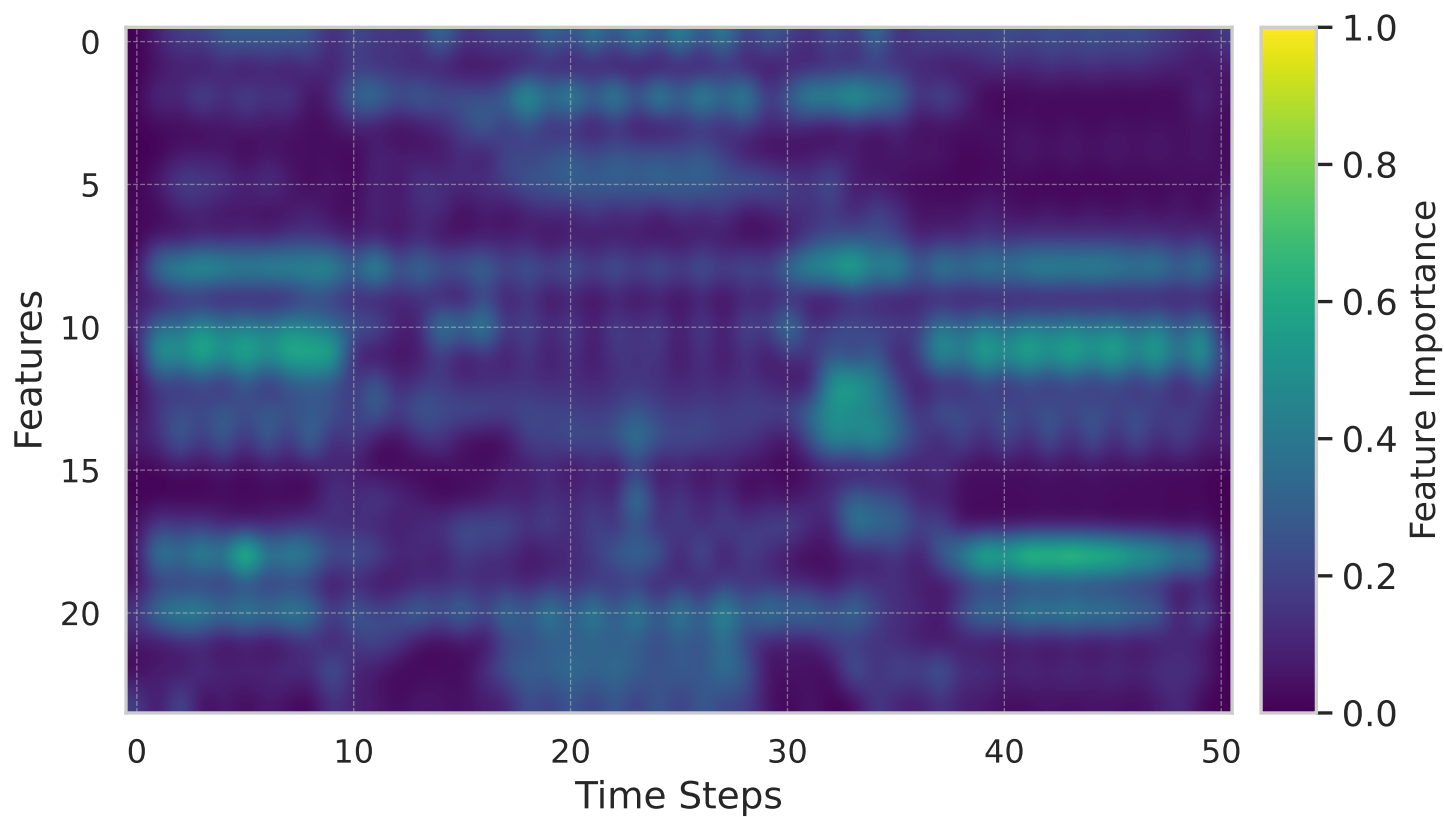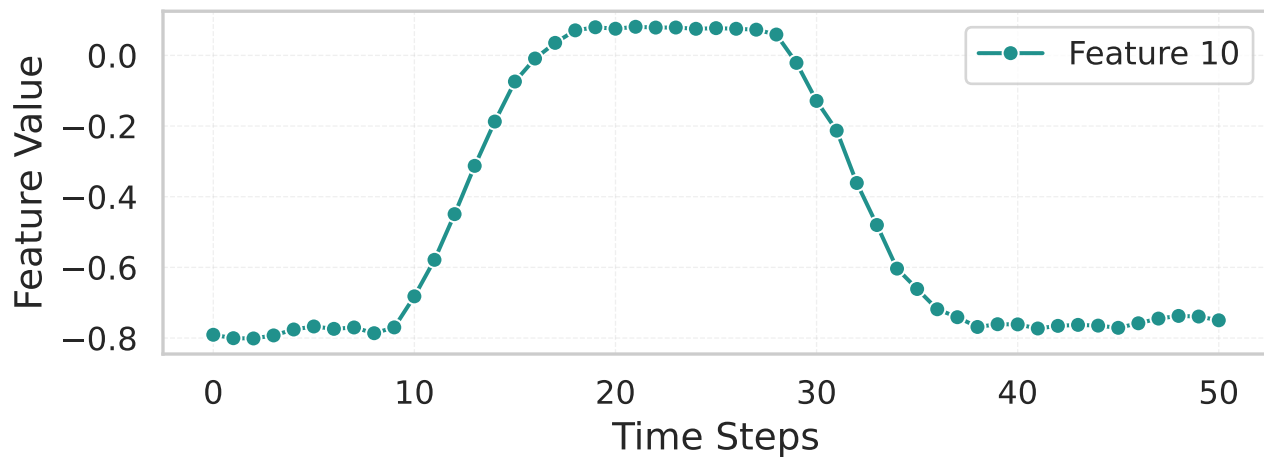



Sample Index: 92

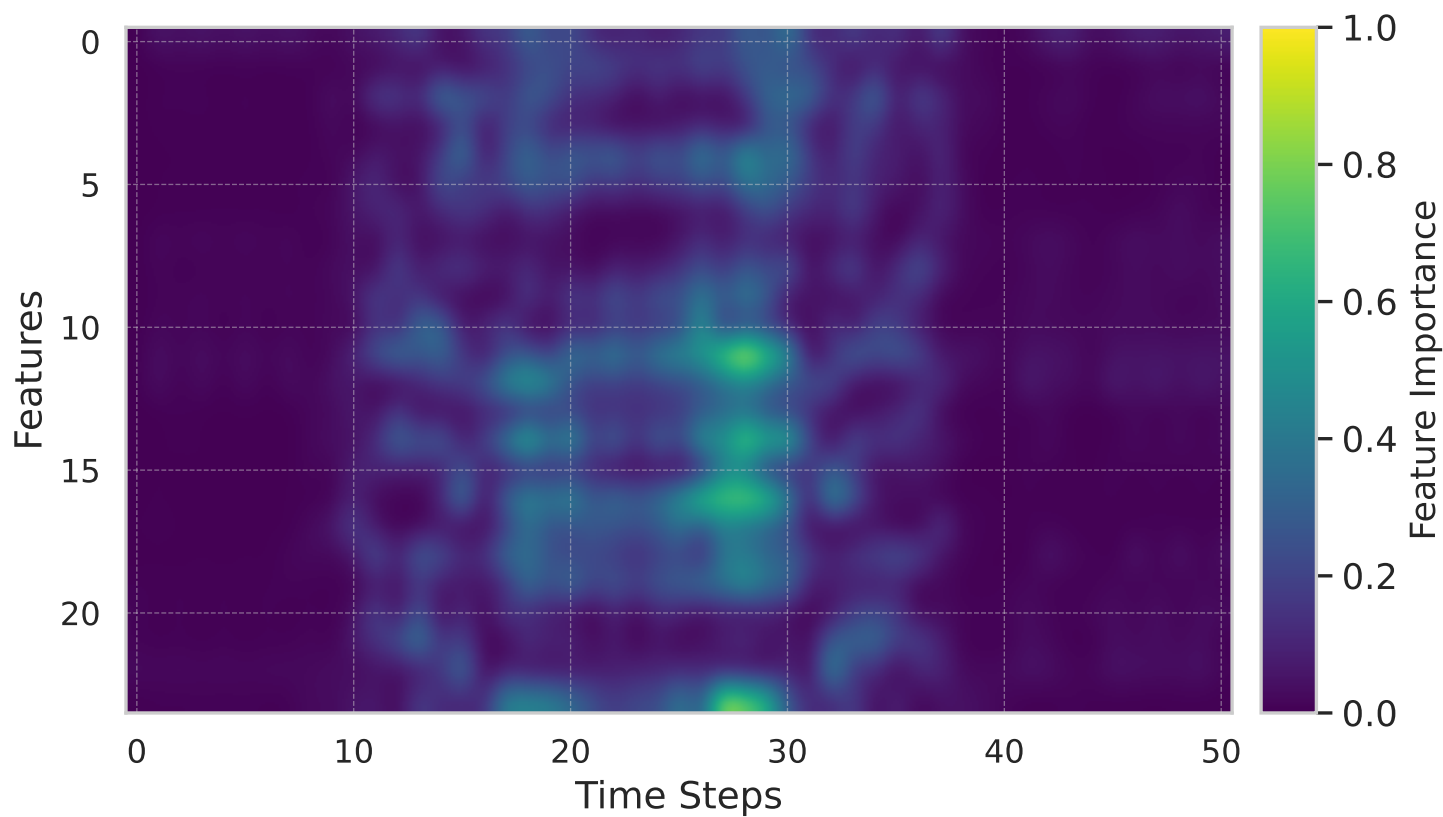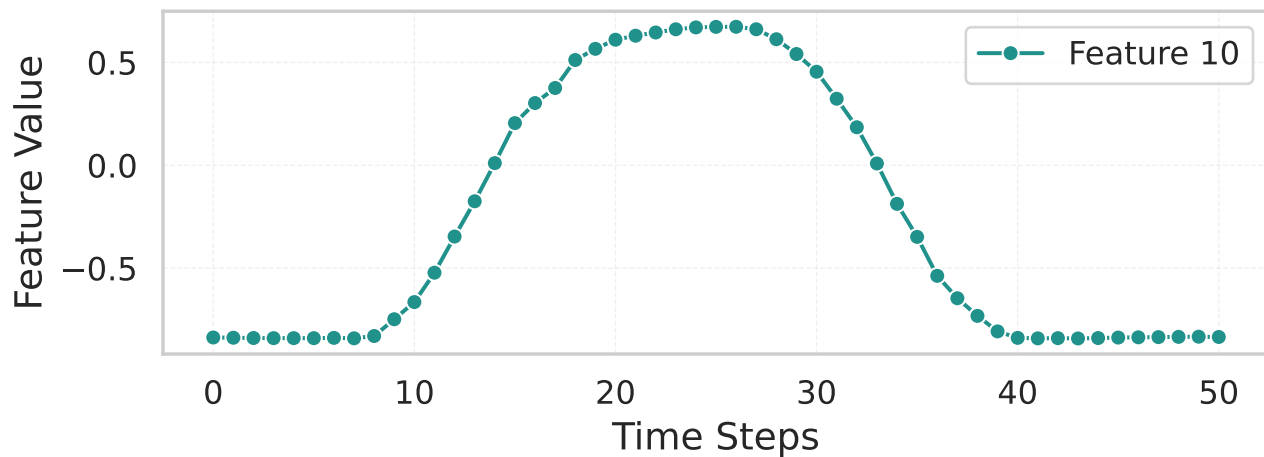

Sample Index: 93

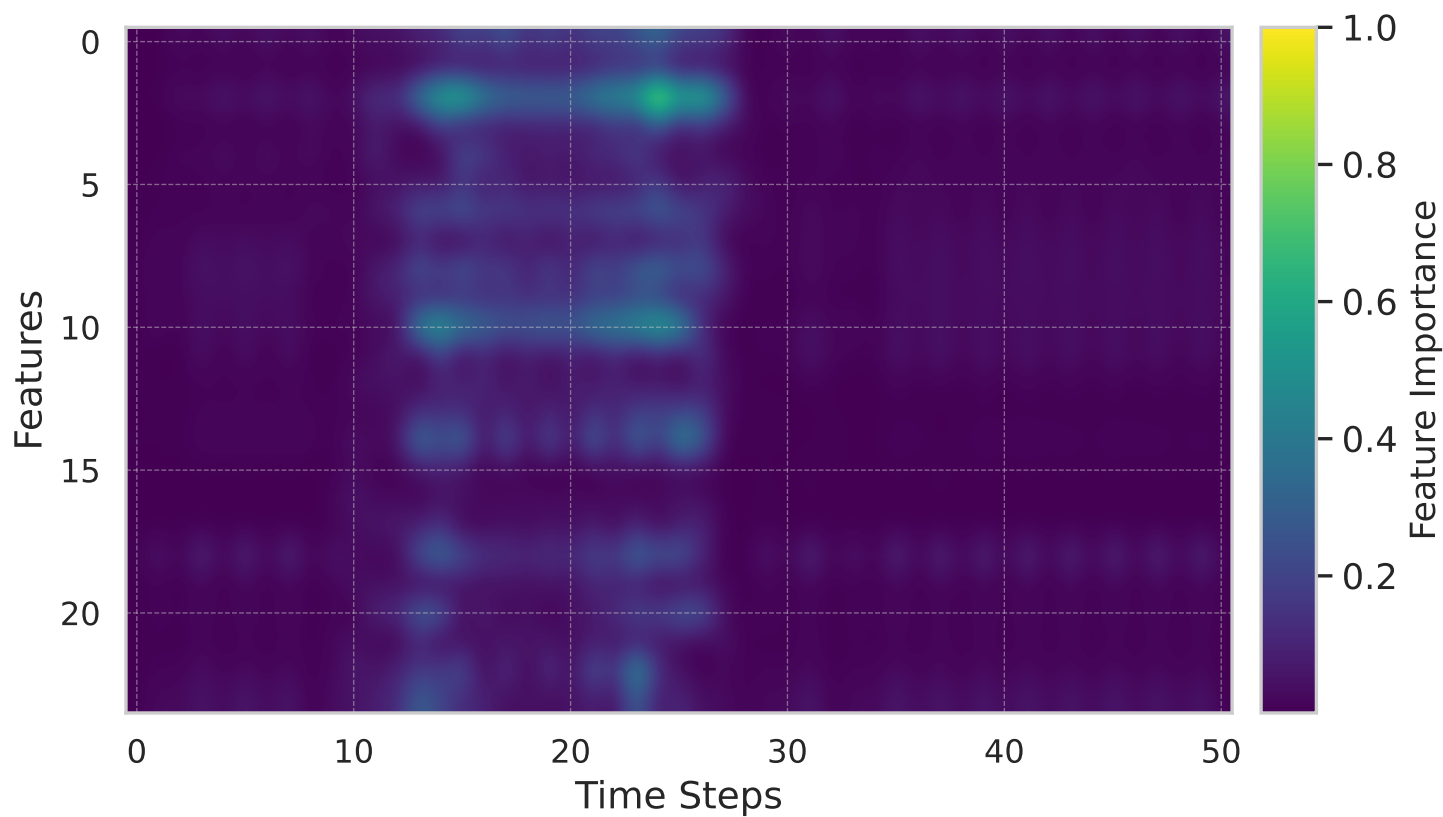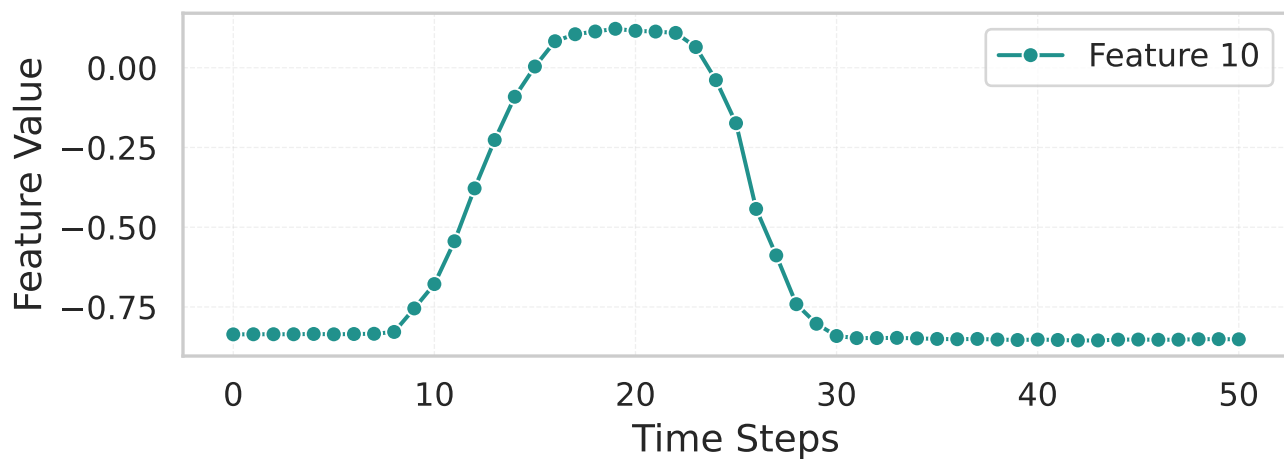

Sample Index: 94

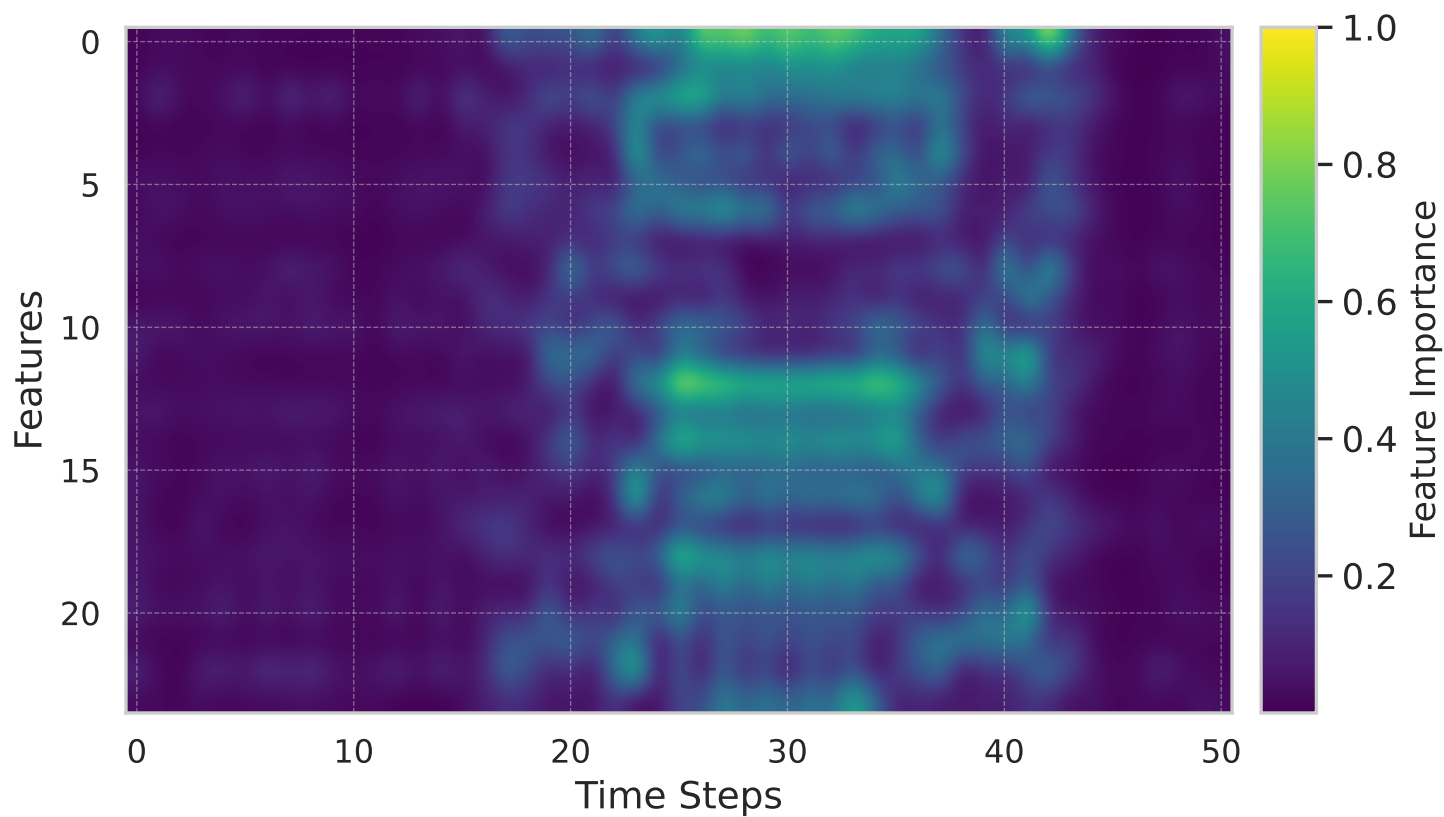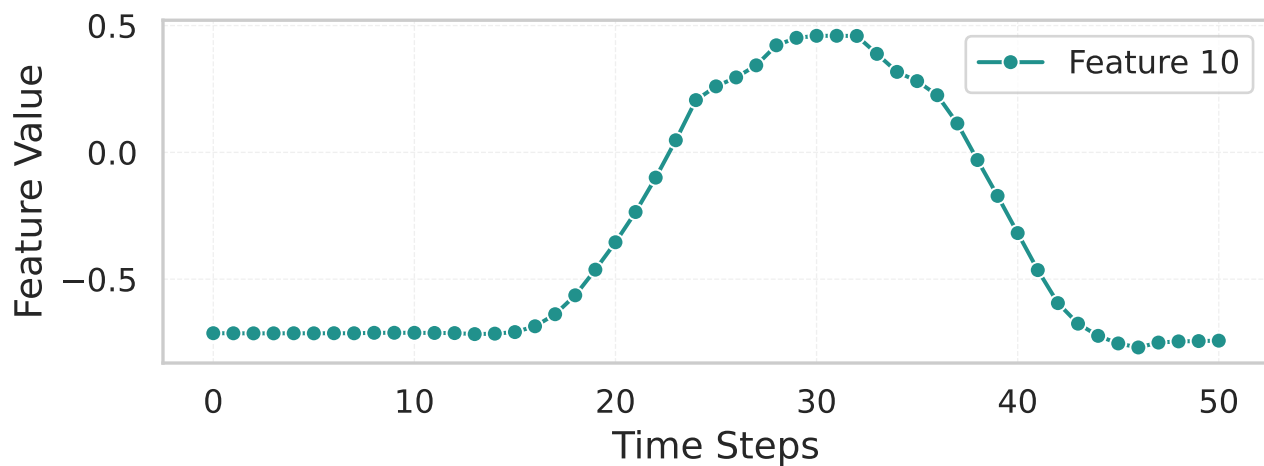

Sample Index: 95

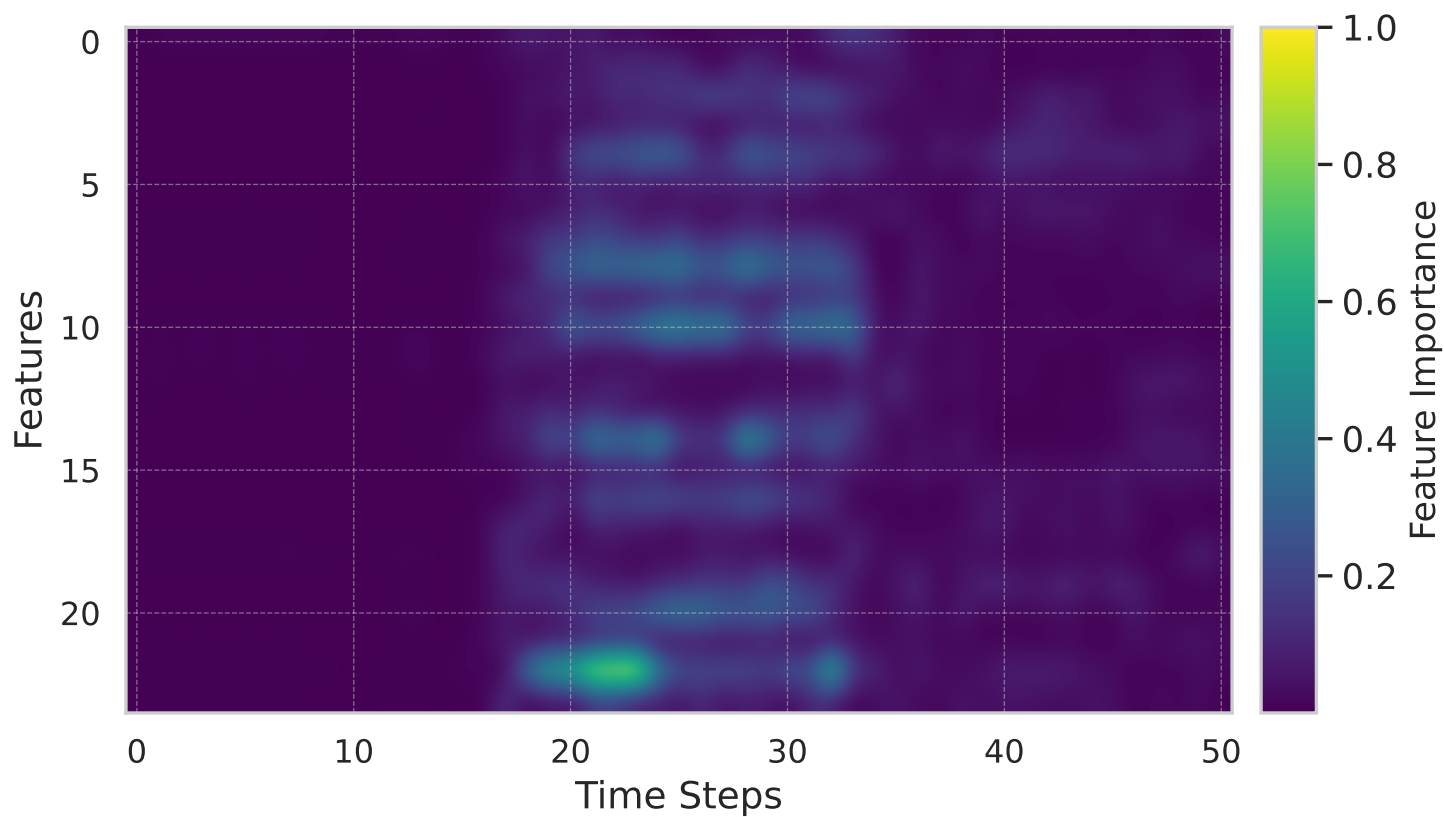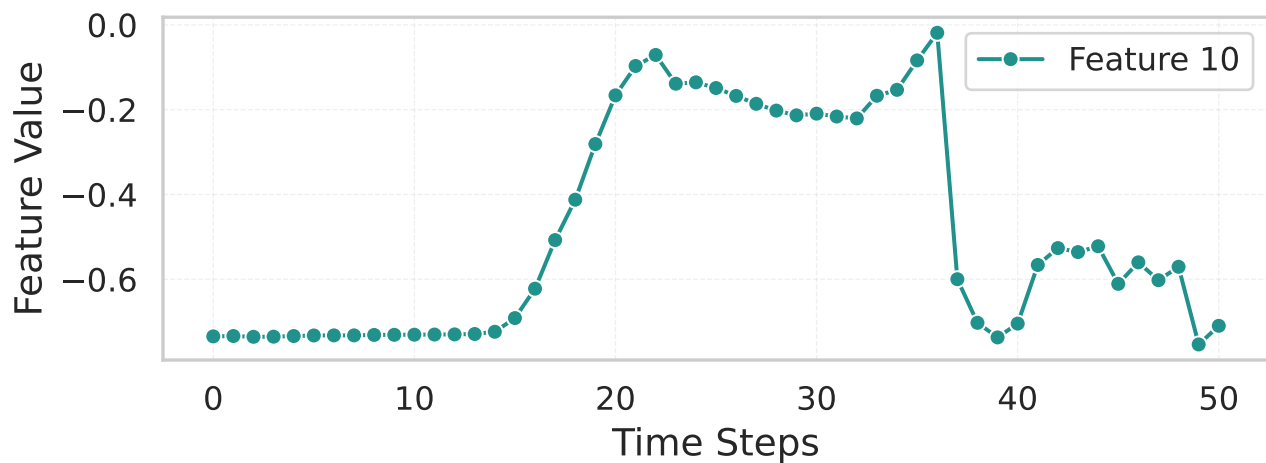

Sample Index: 96

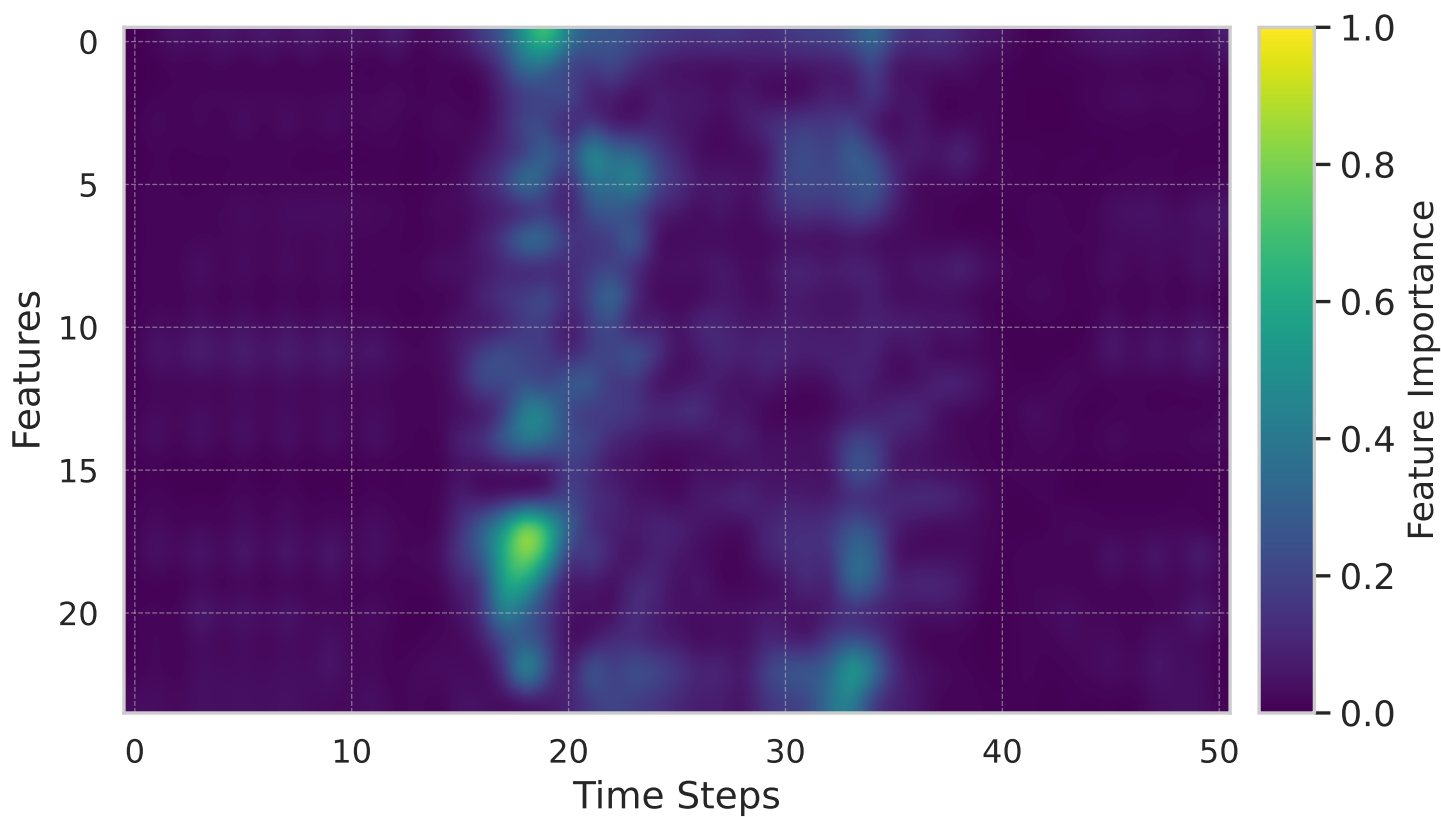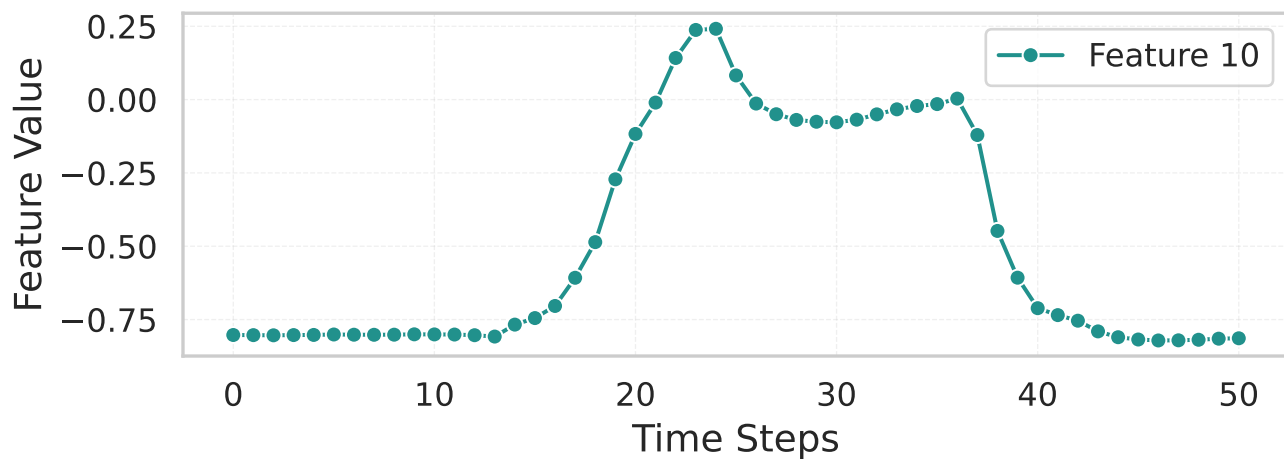

Sample Index: 97

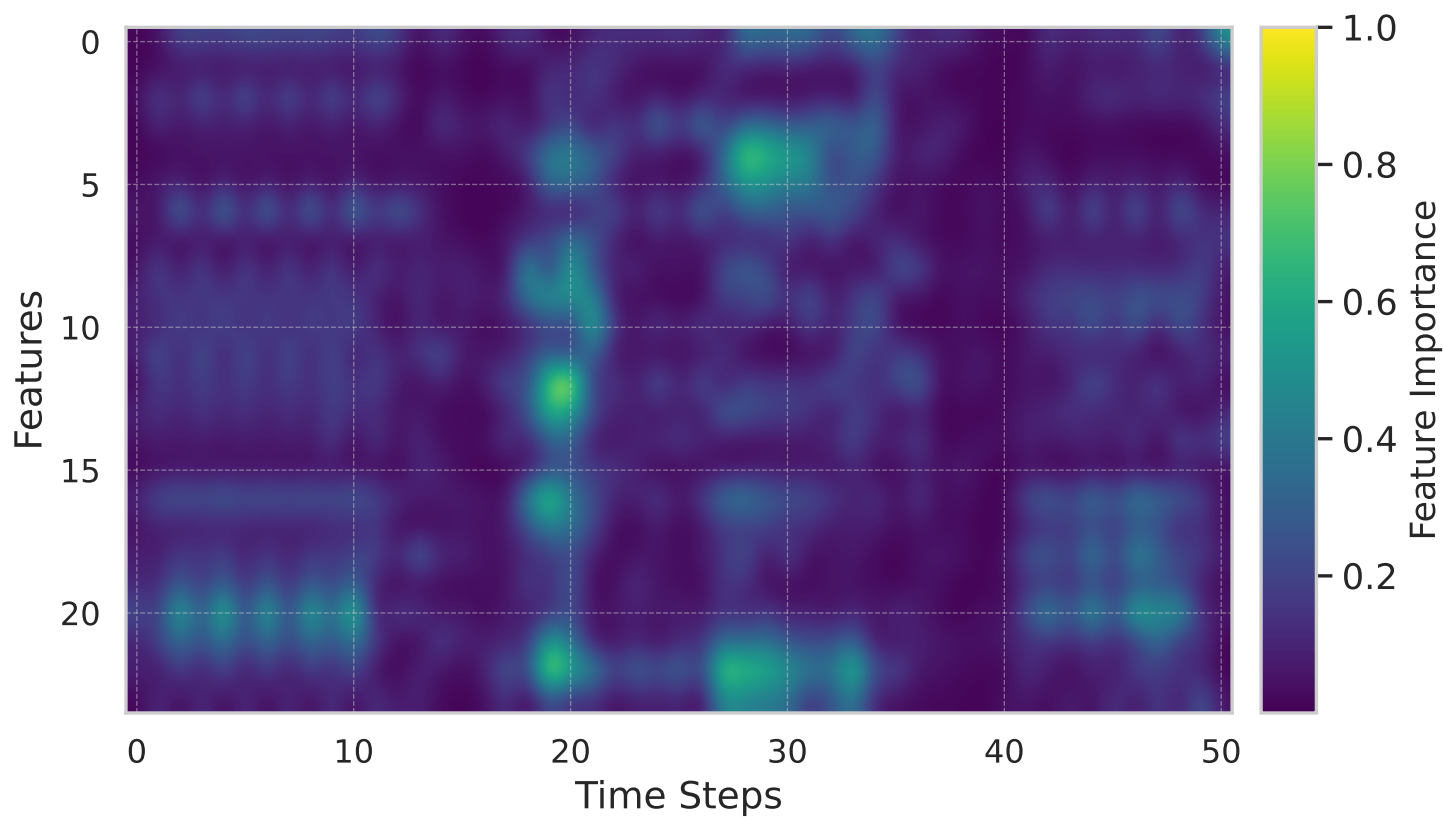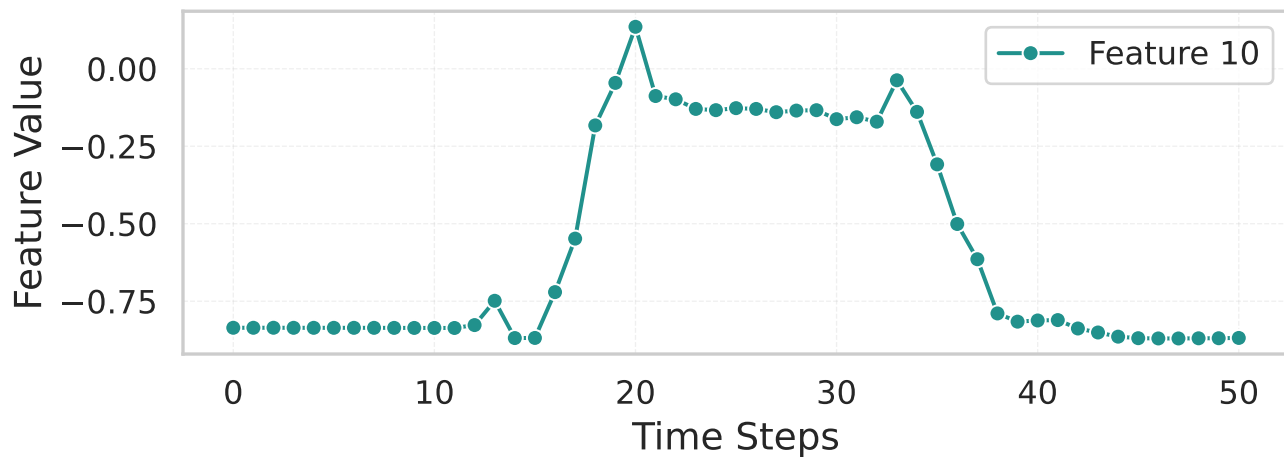

Sample Index: 98

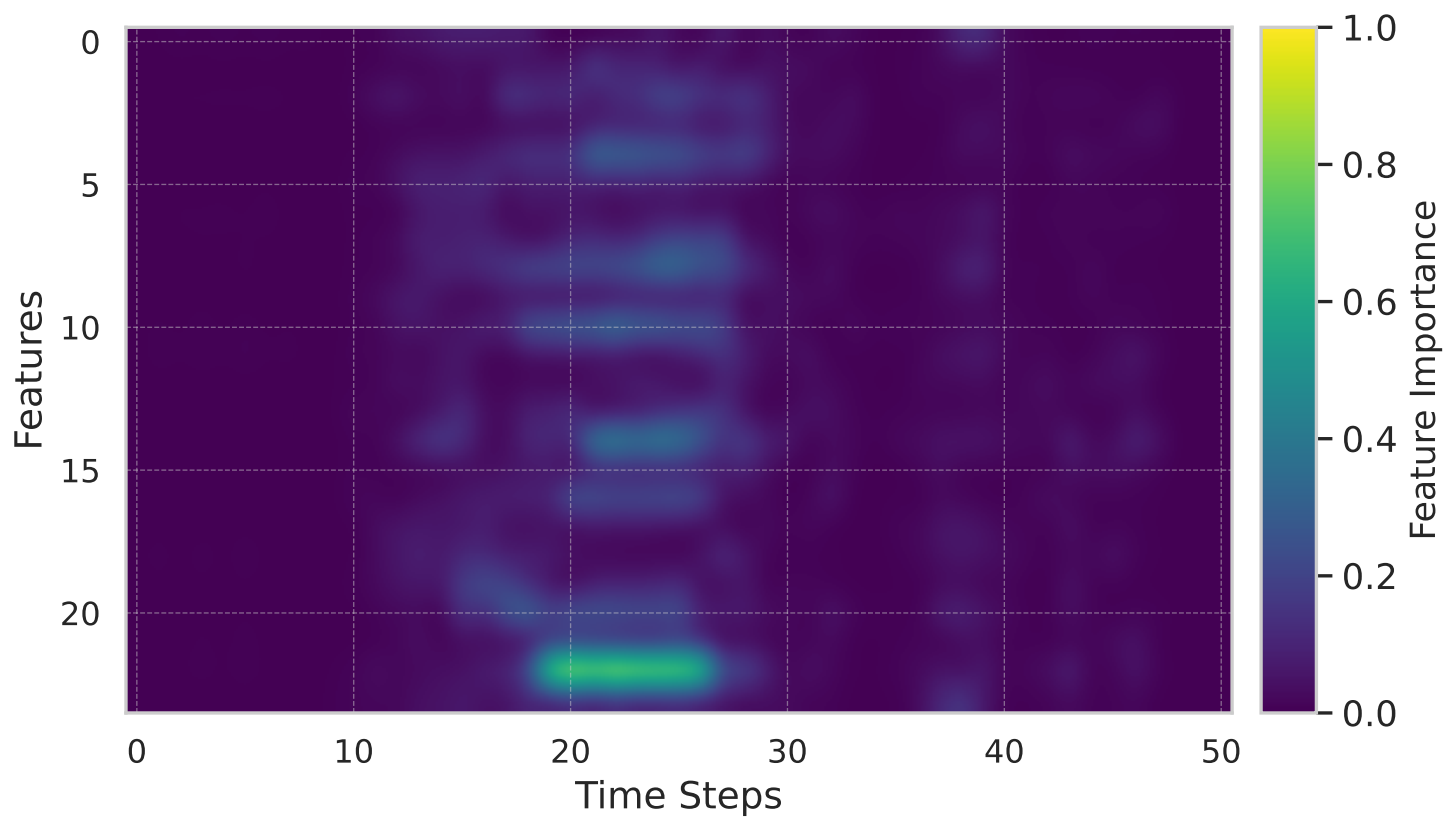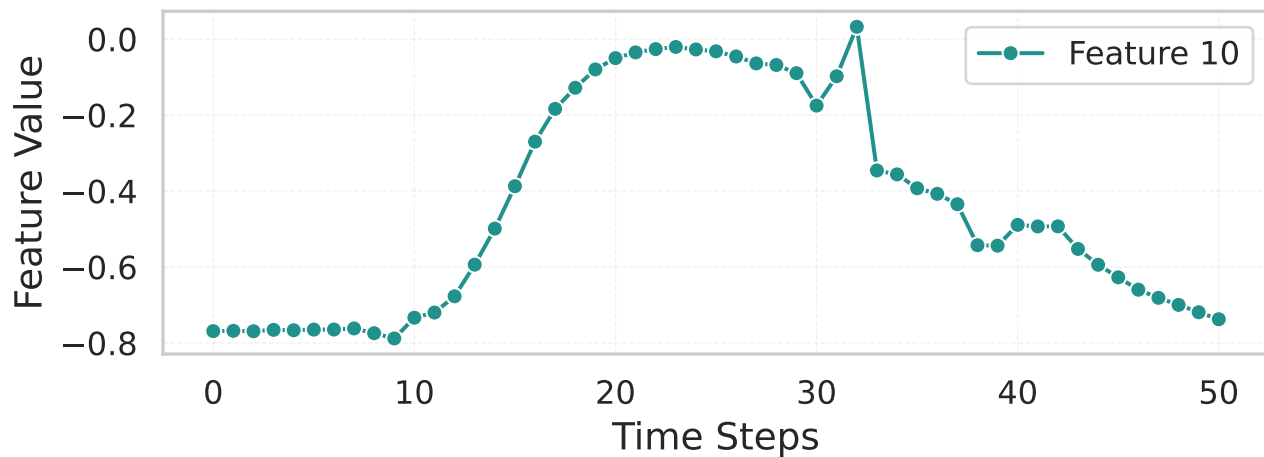

Sample Index: 99

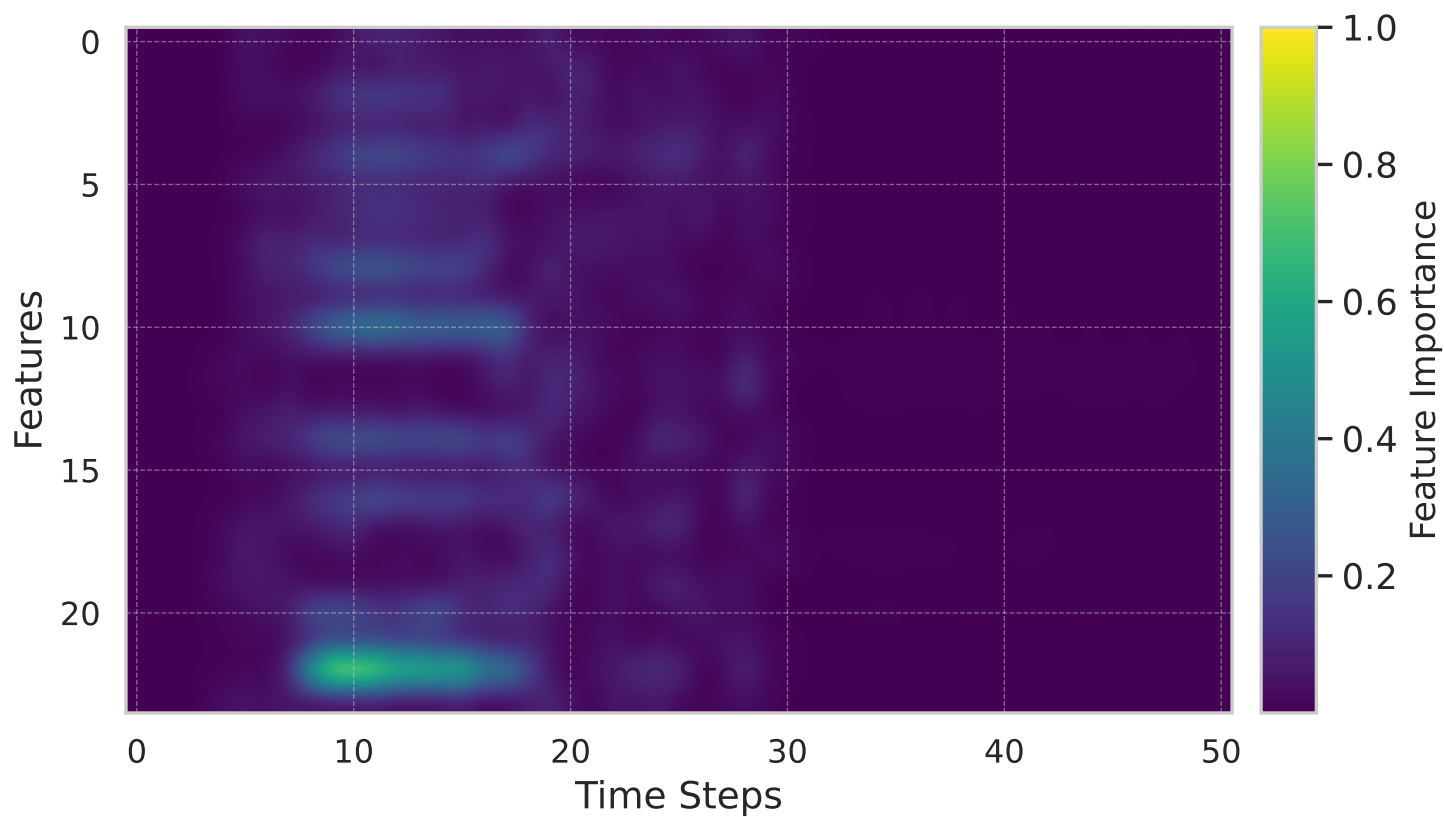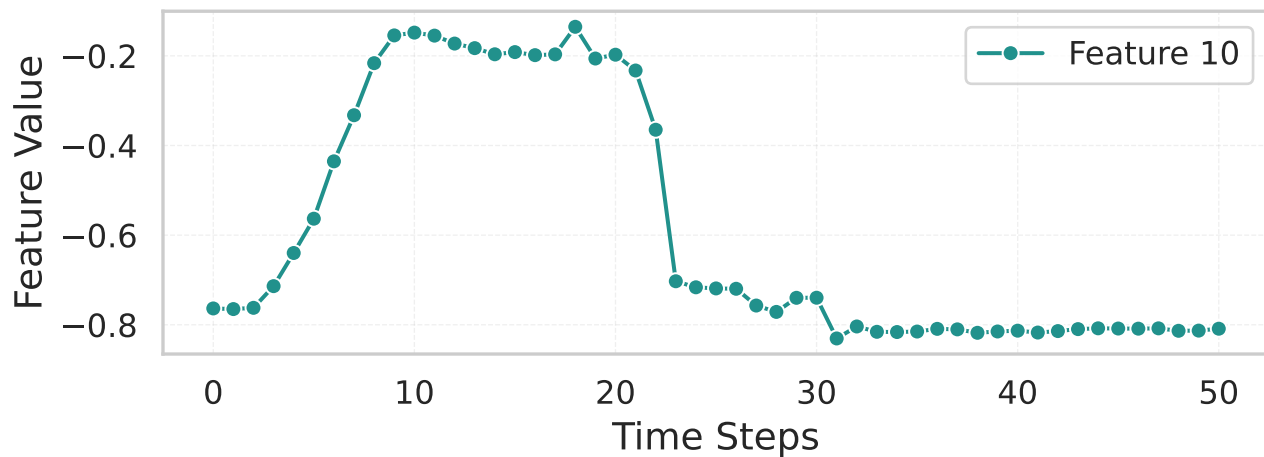



Sample Index: 100

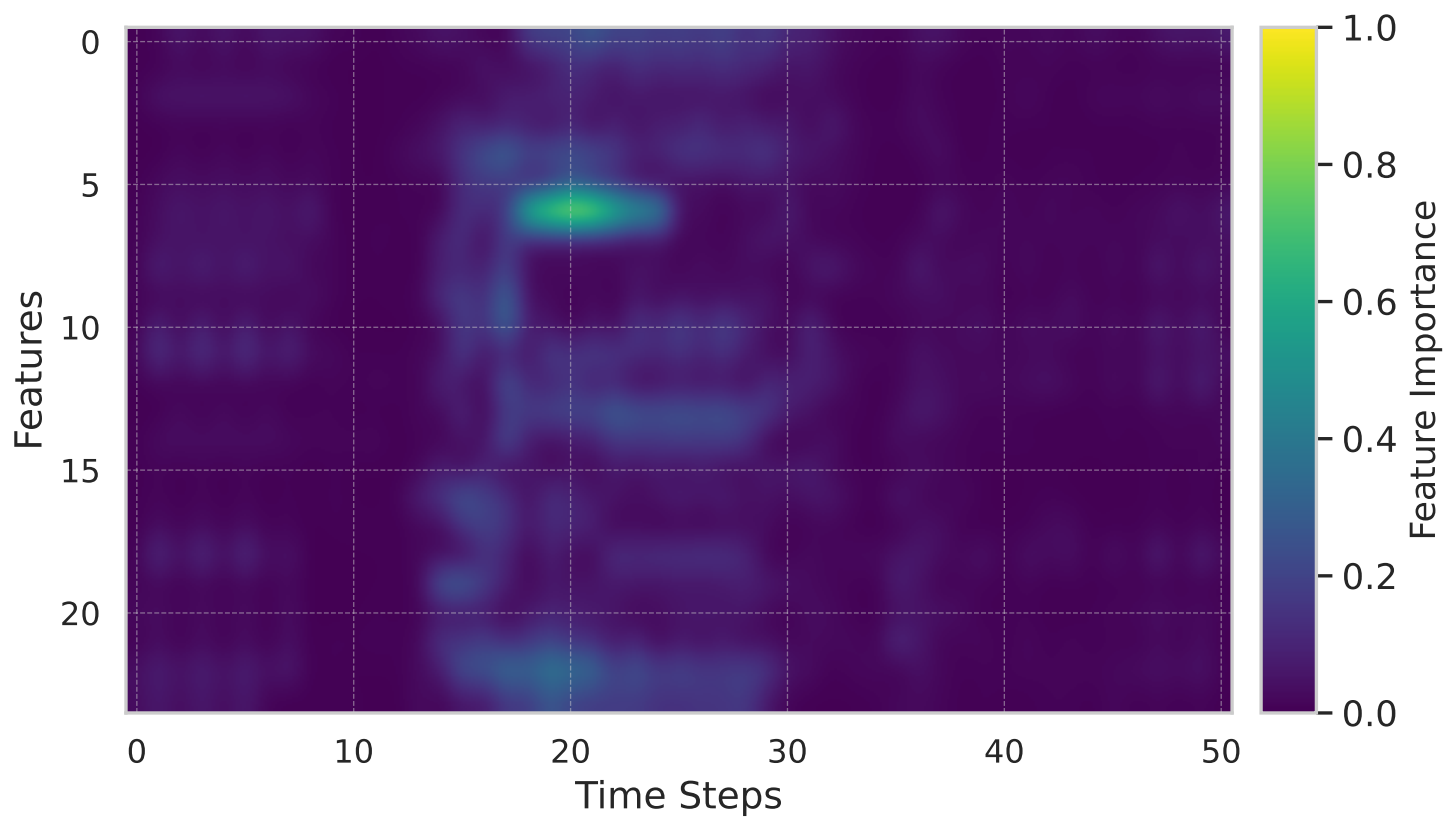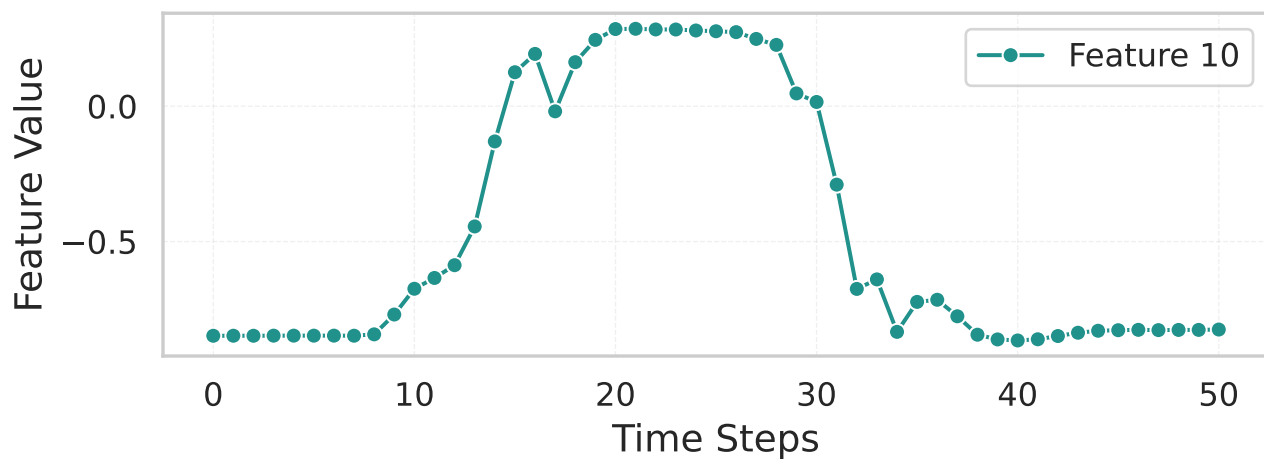

Sample Index: 101

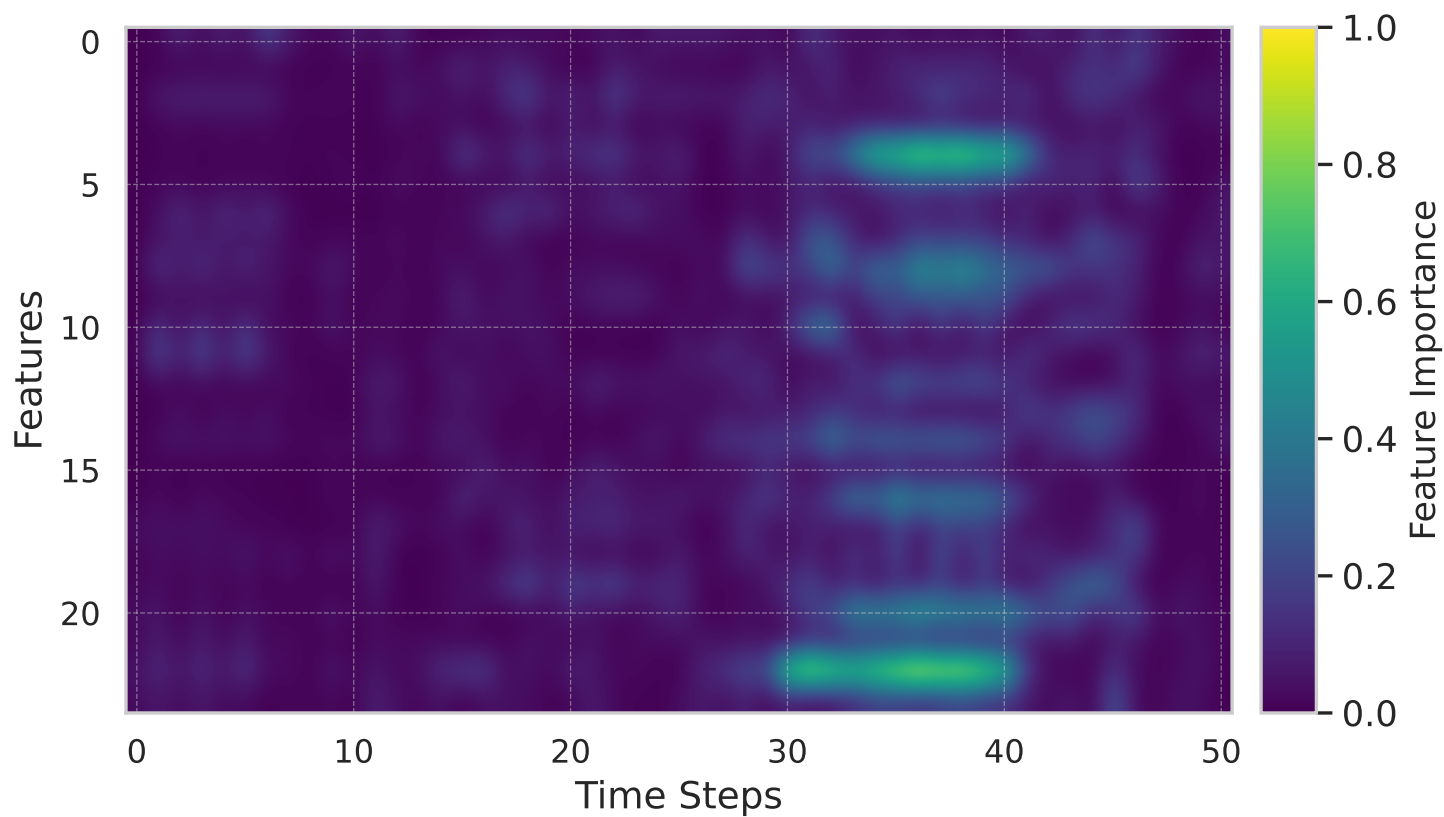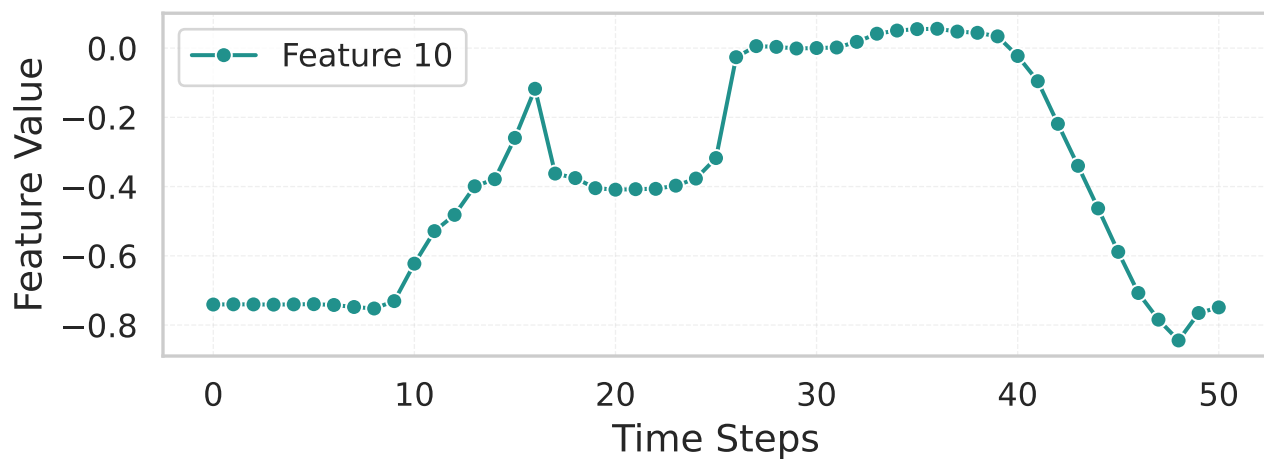

Sample Index: 102

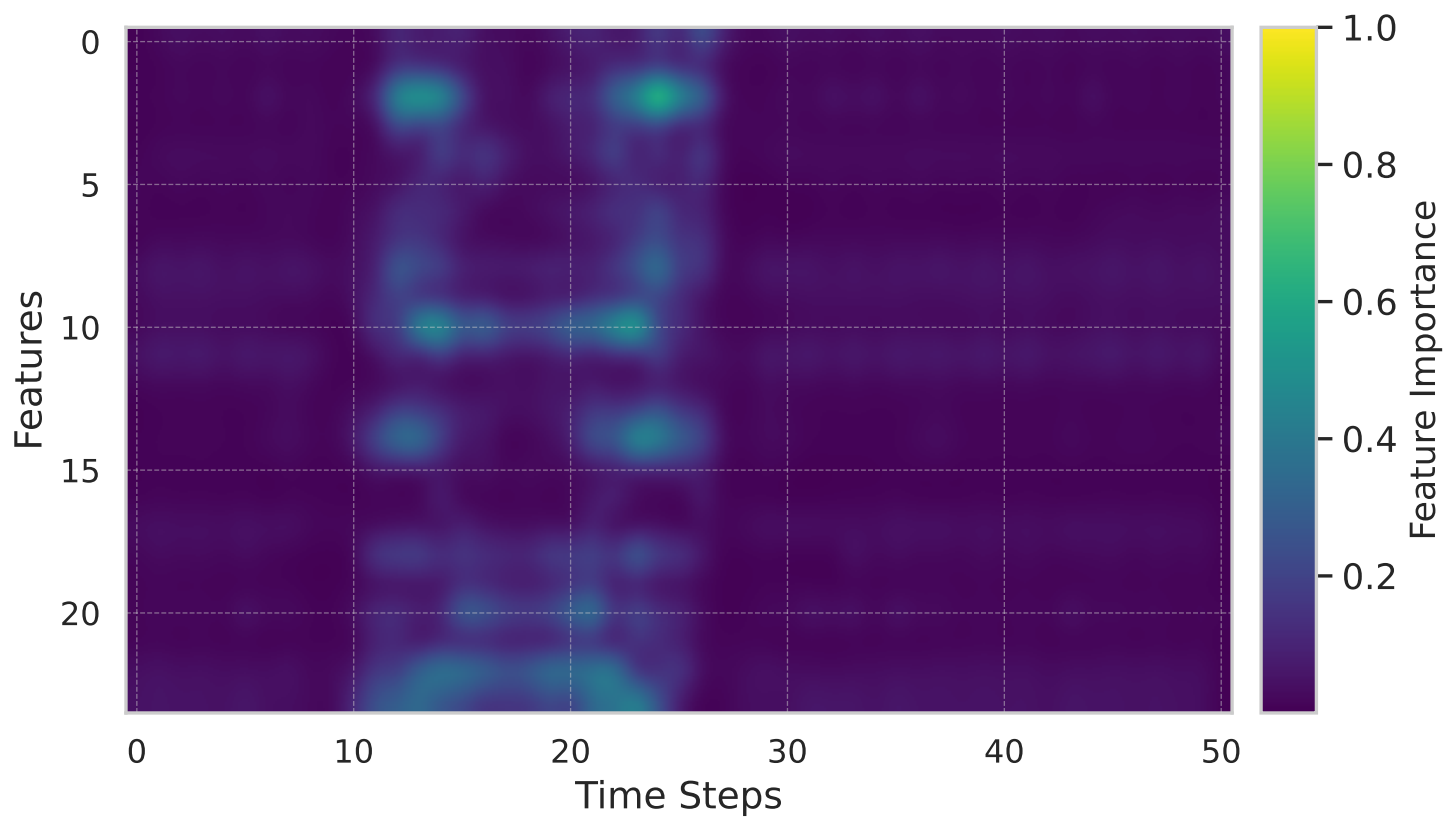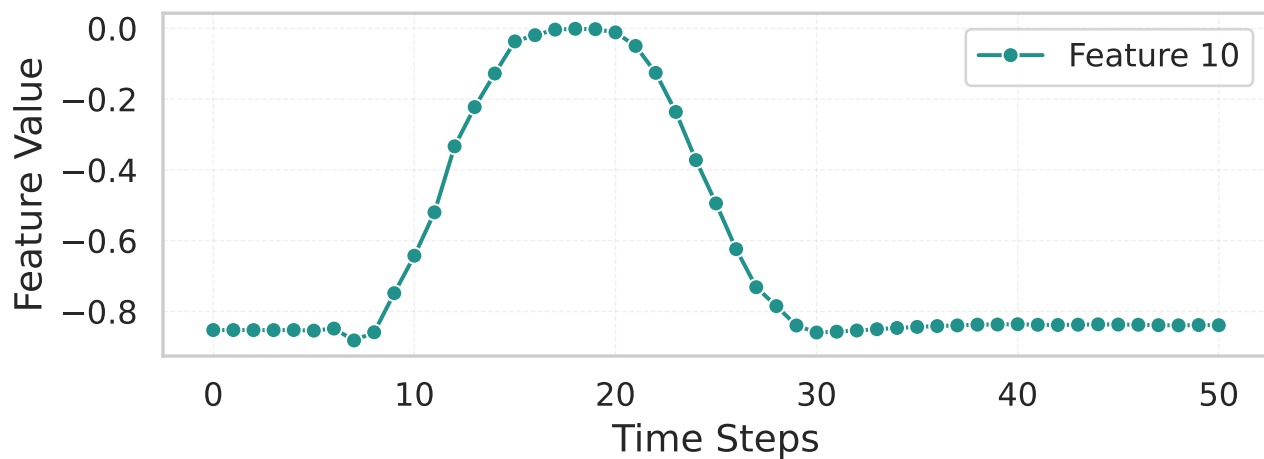

Sample Index: 103

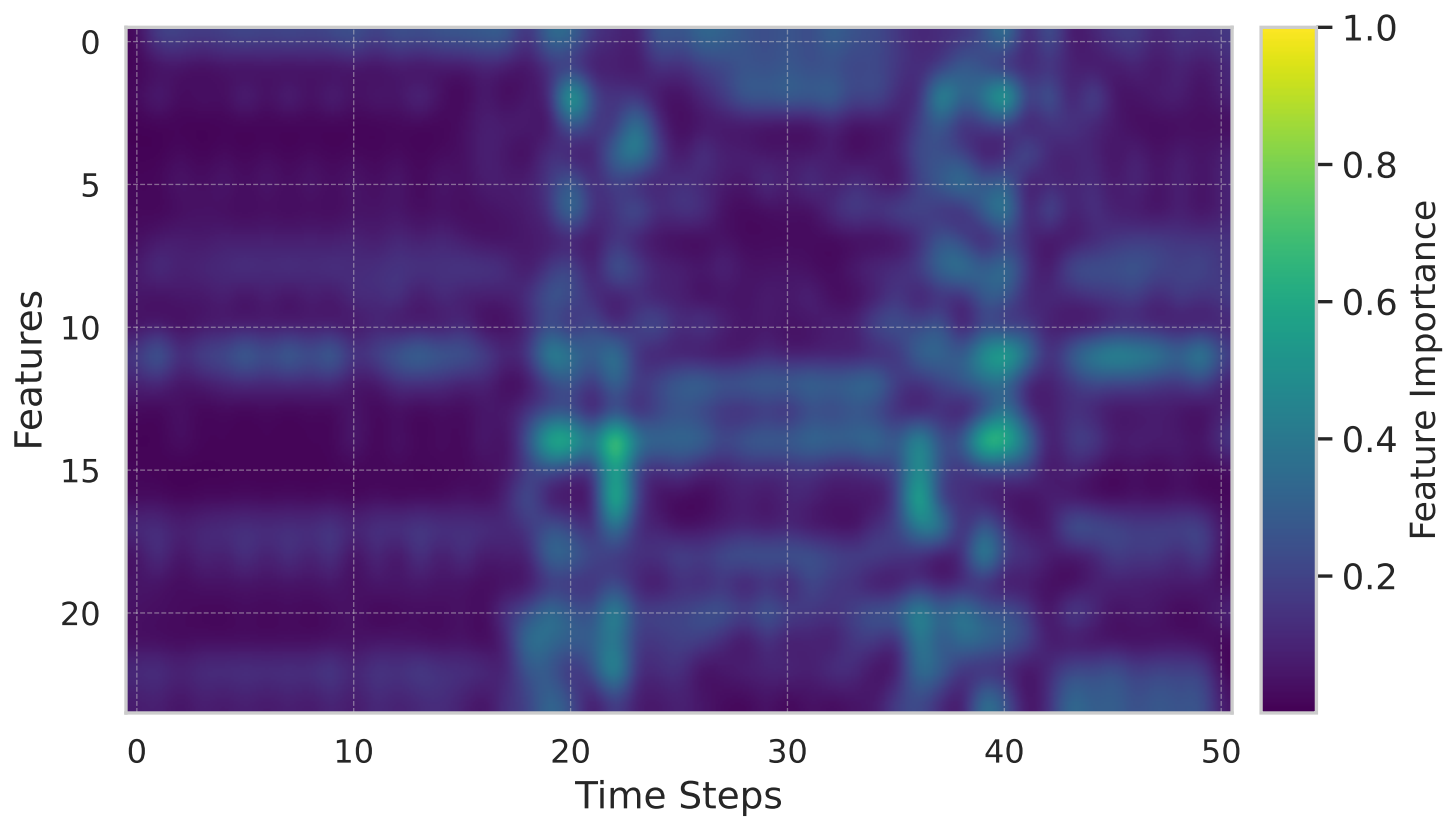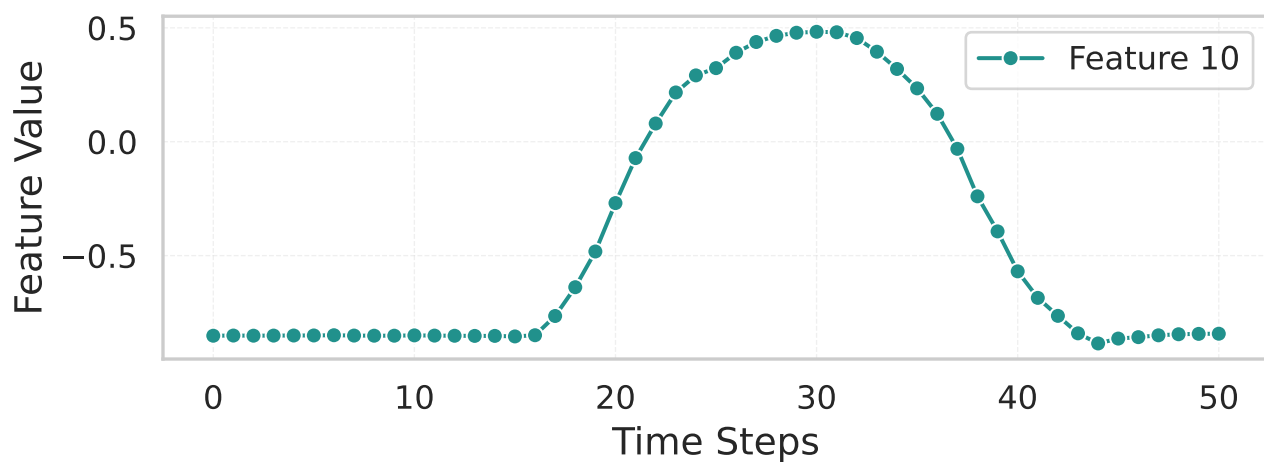

Sample Index: 104

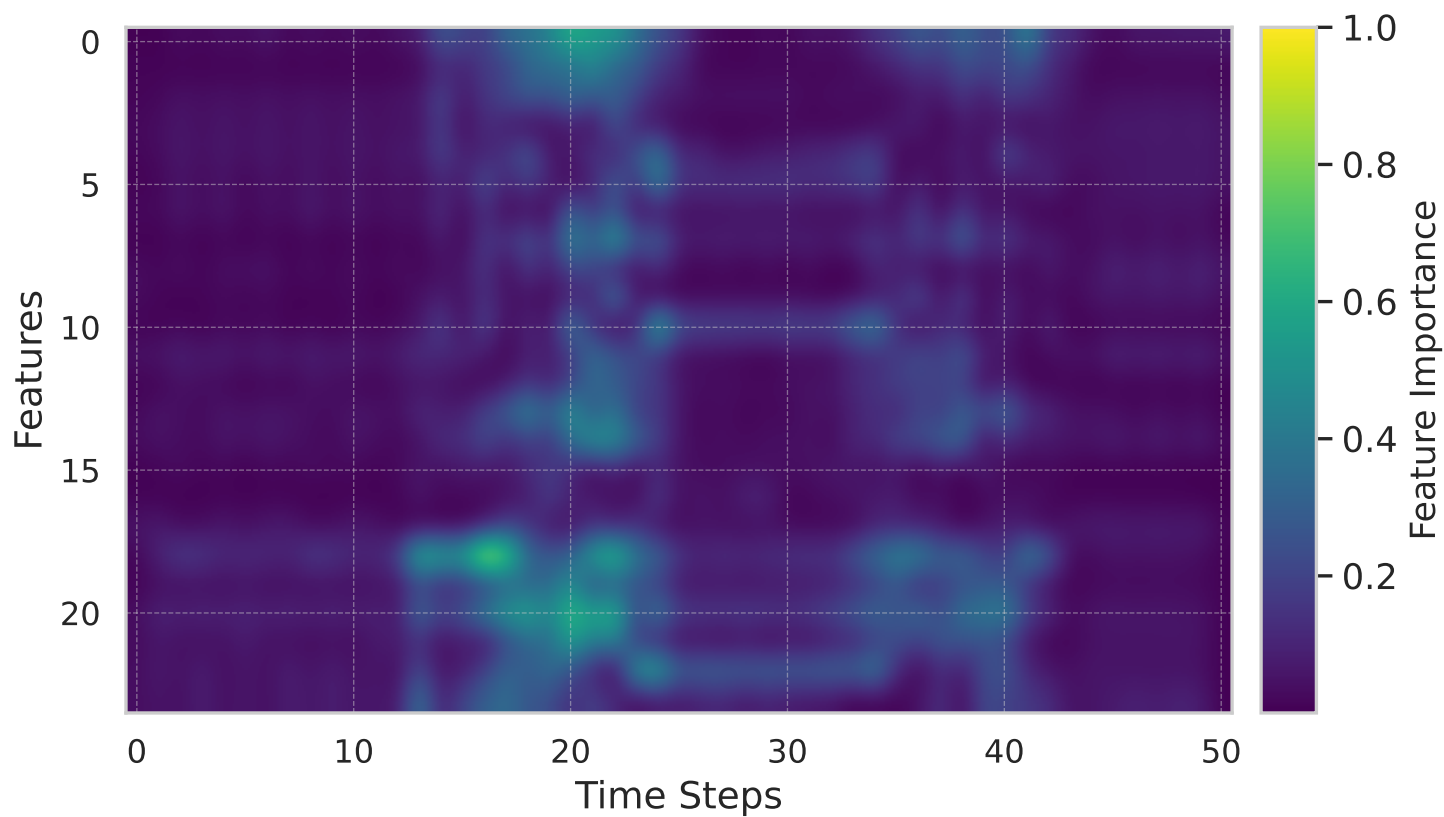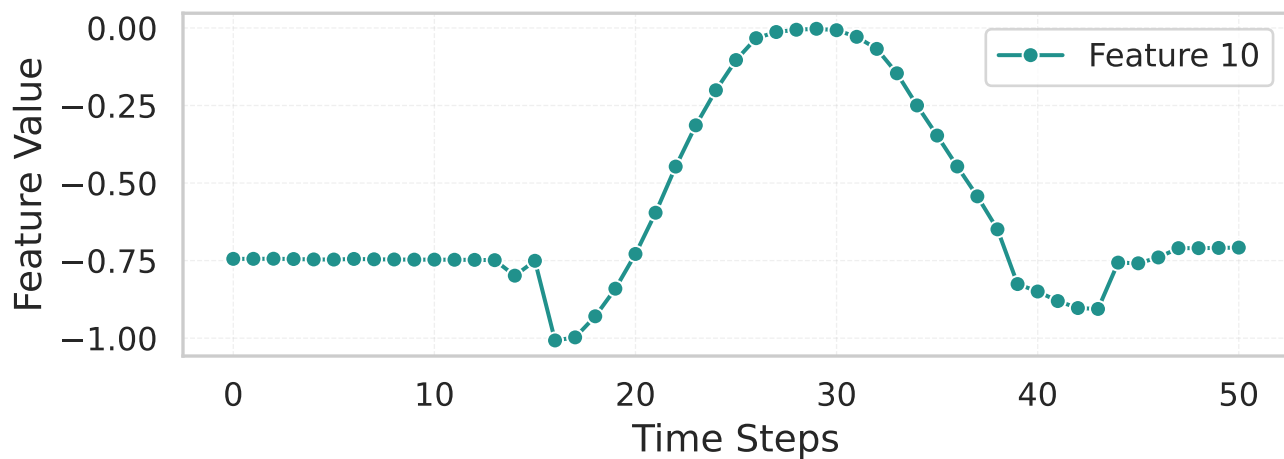

Sample Index: 105

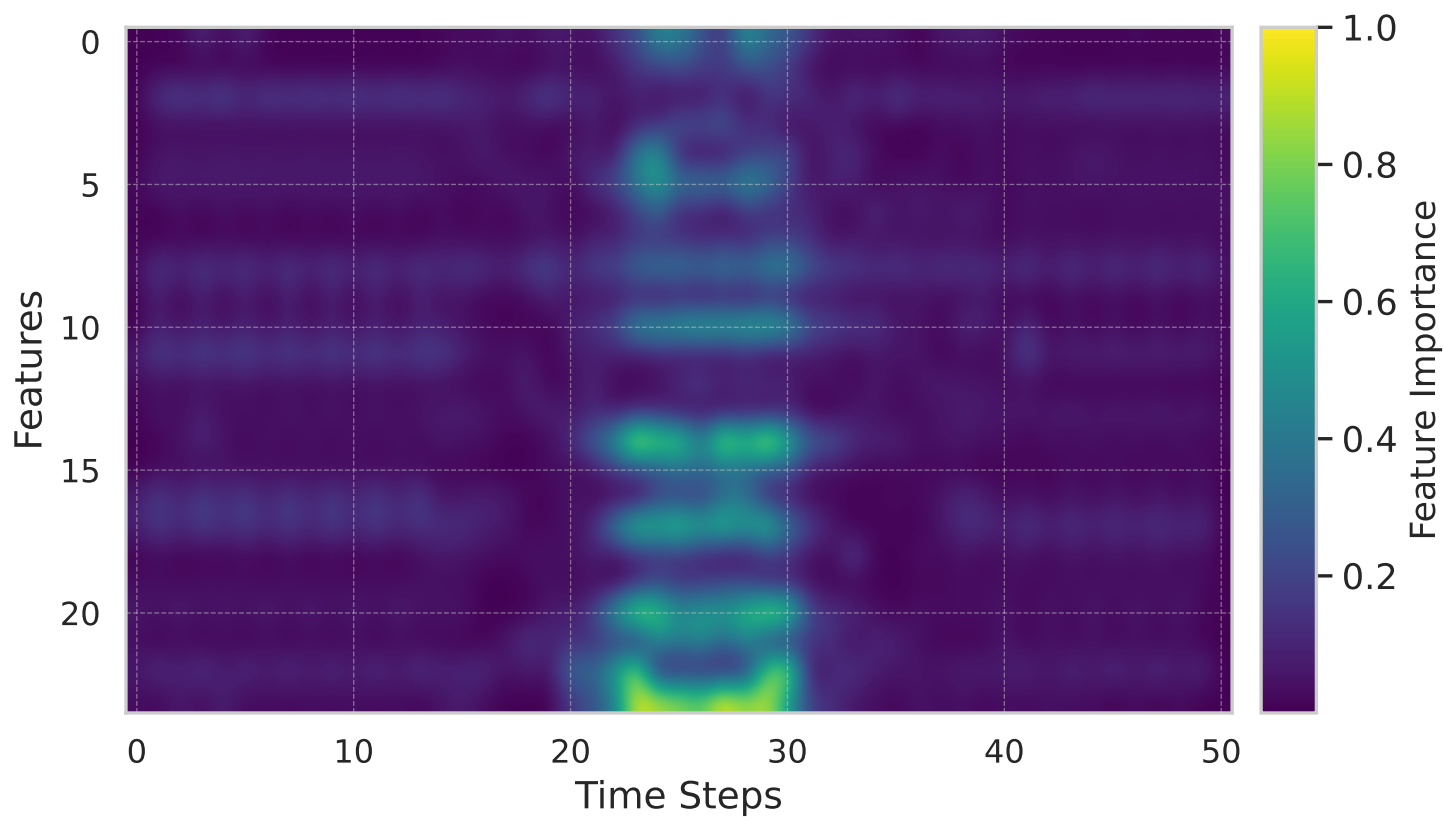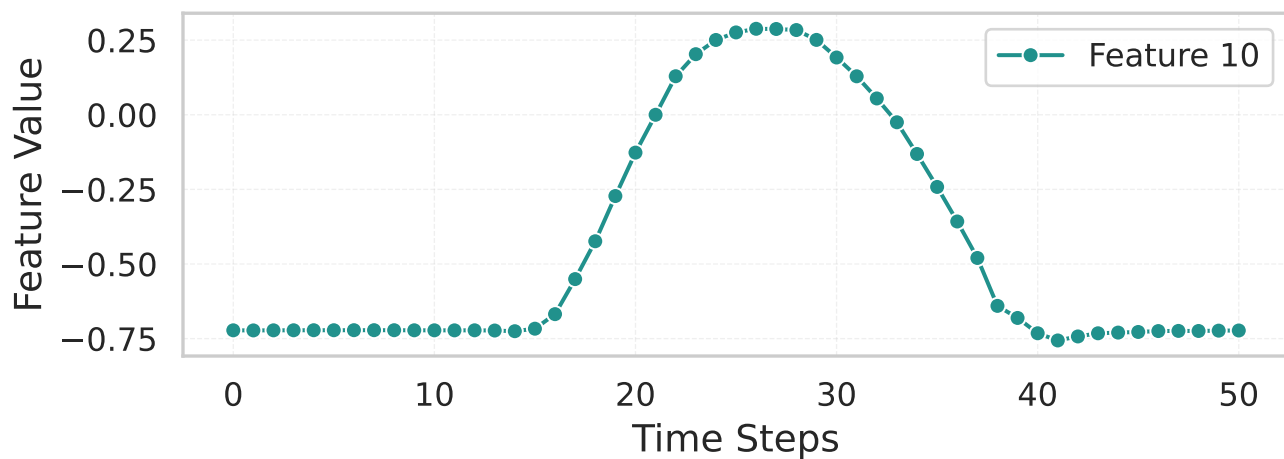

Sample Index: 106

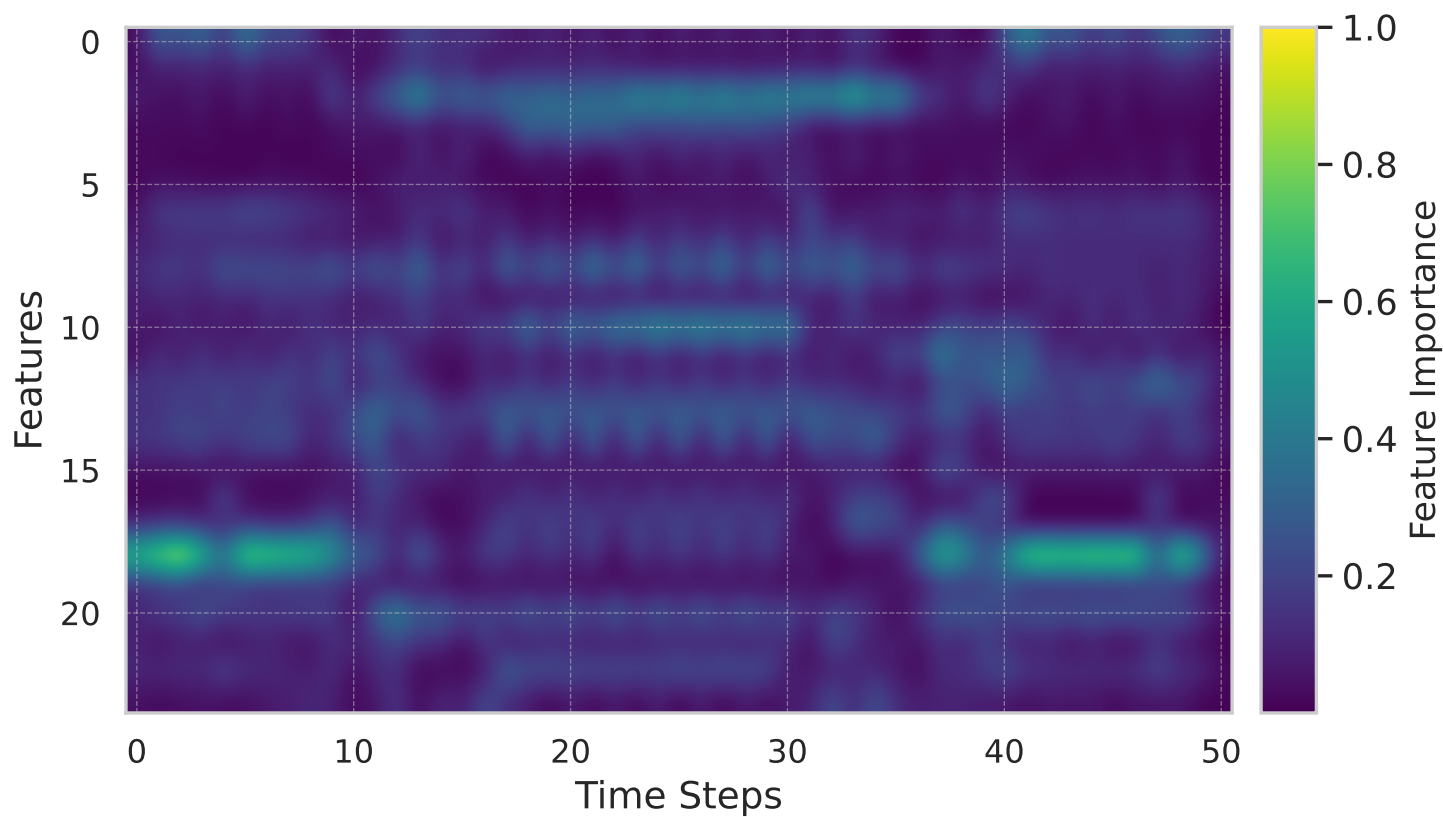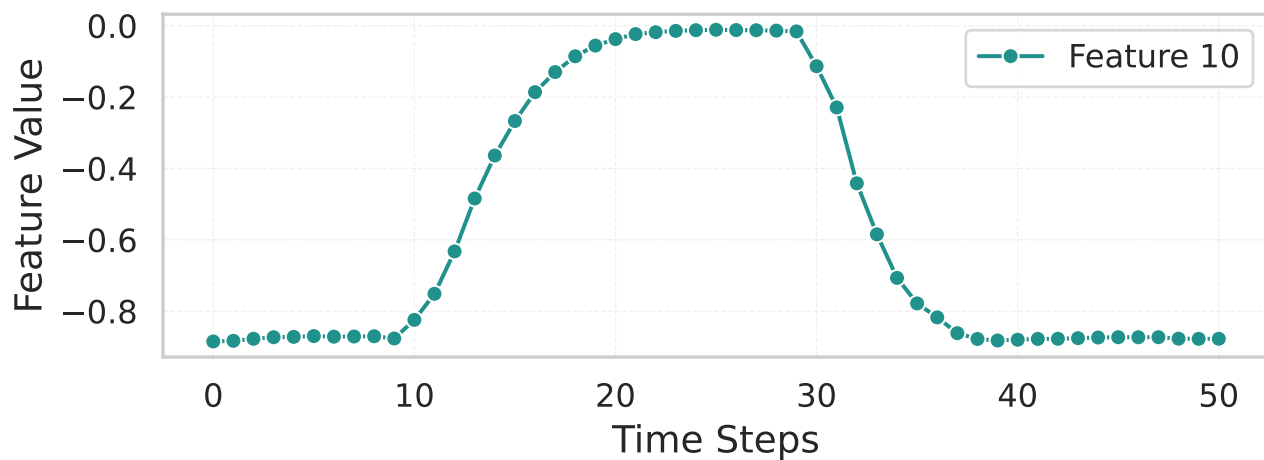

Sample Index: 107

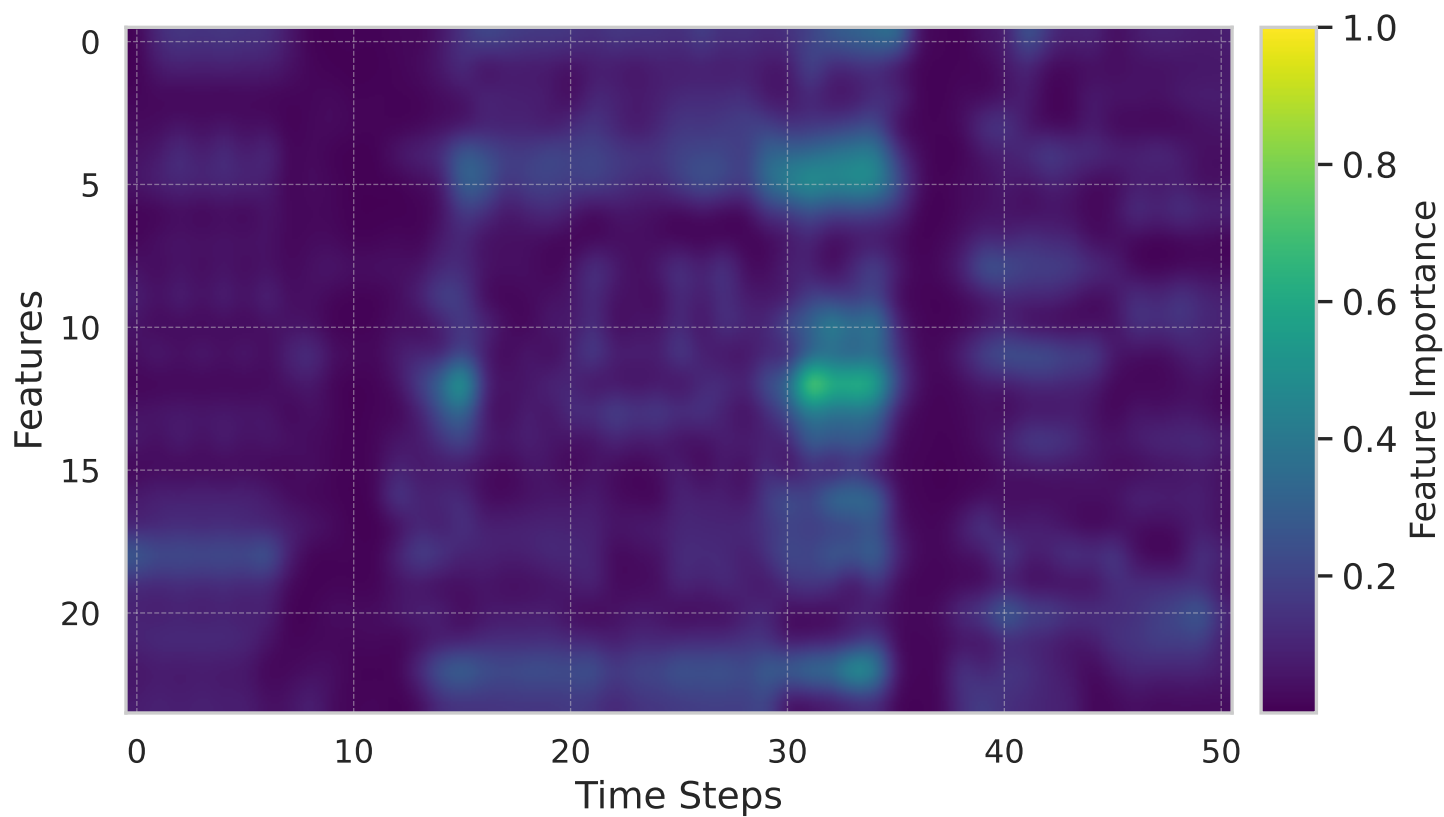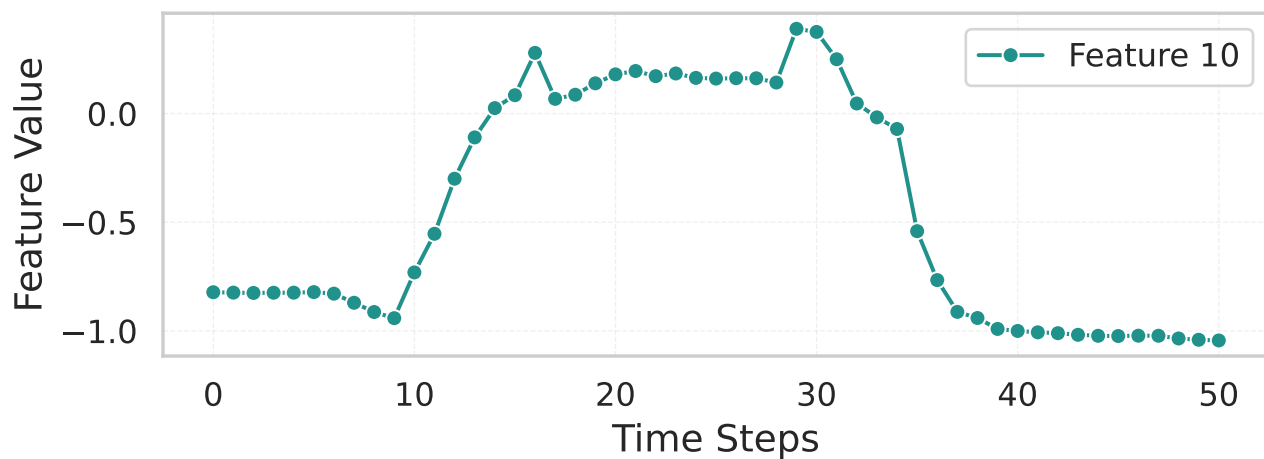



Sample Index: 108

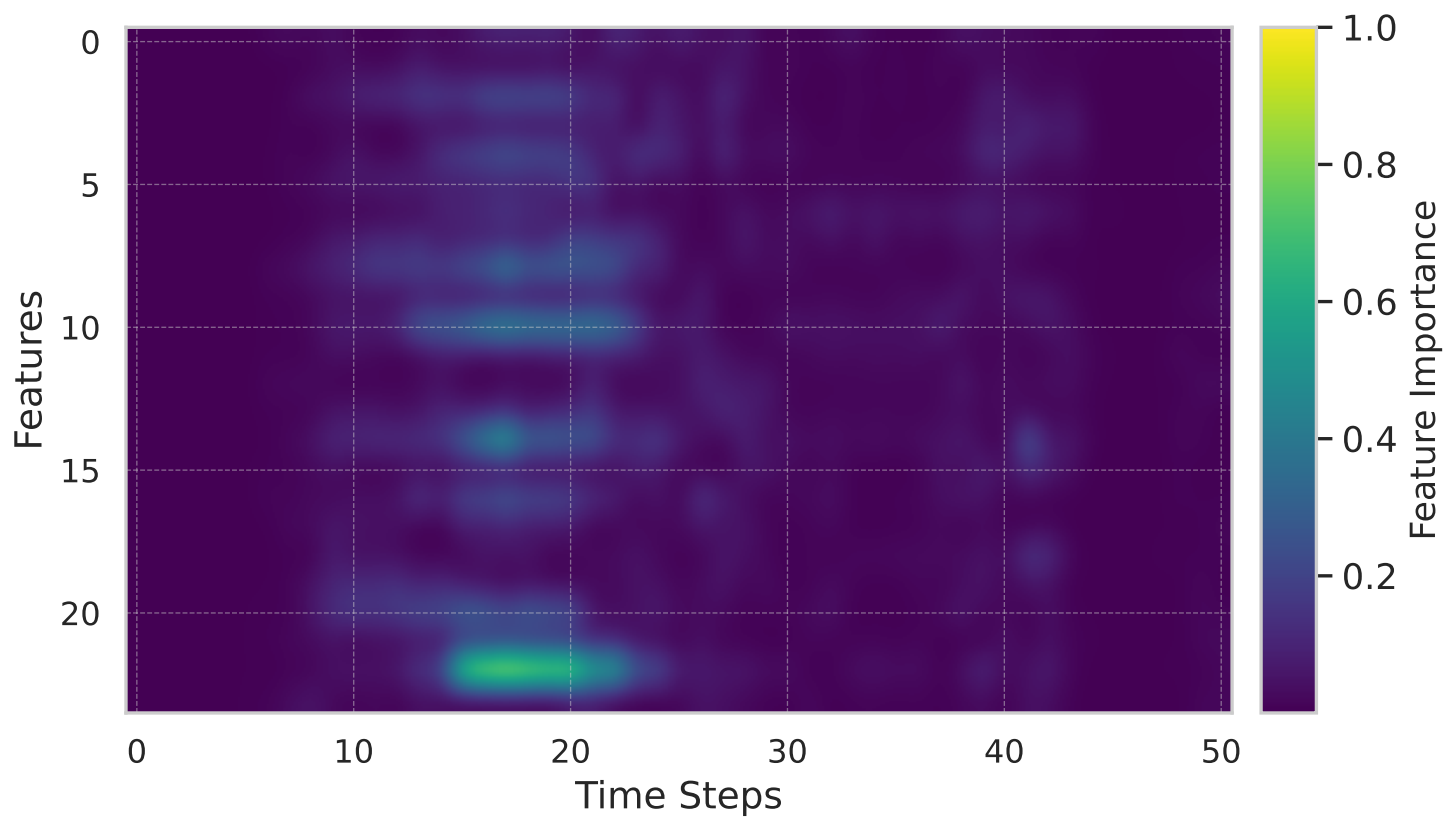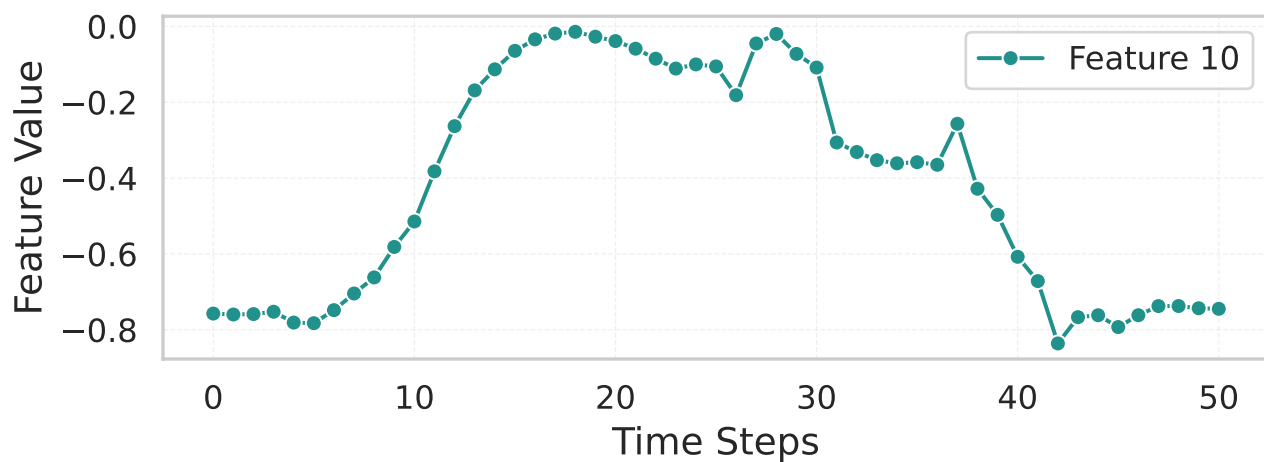

Sample Index: 109

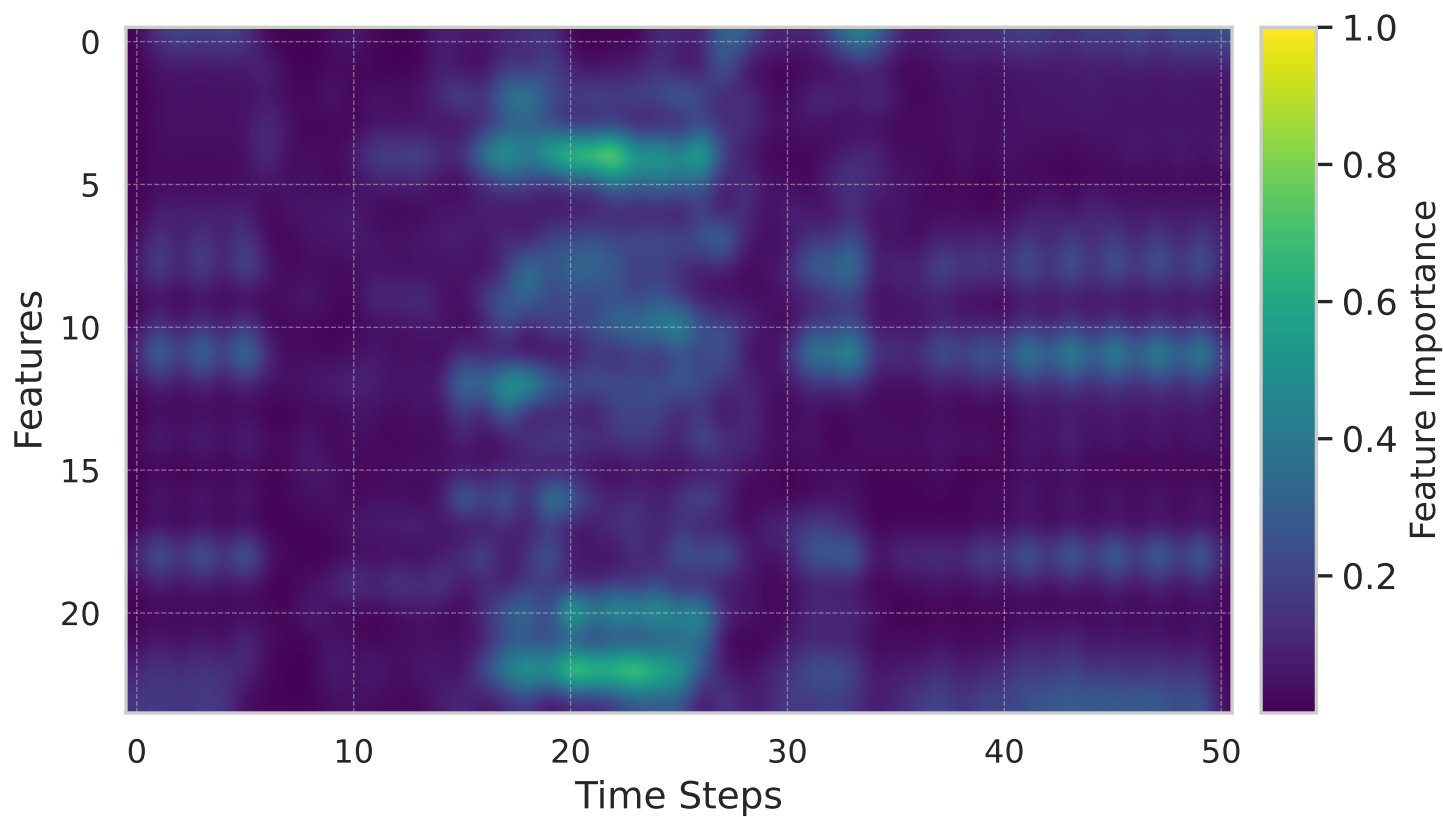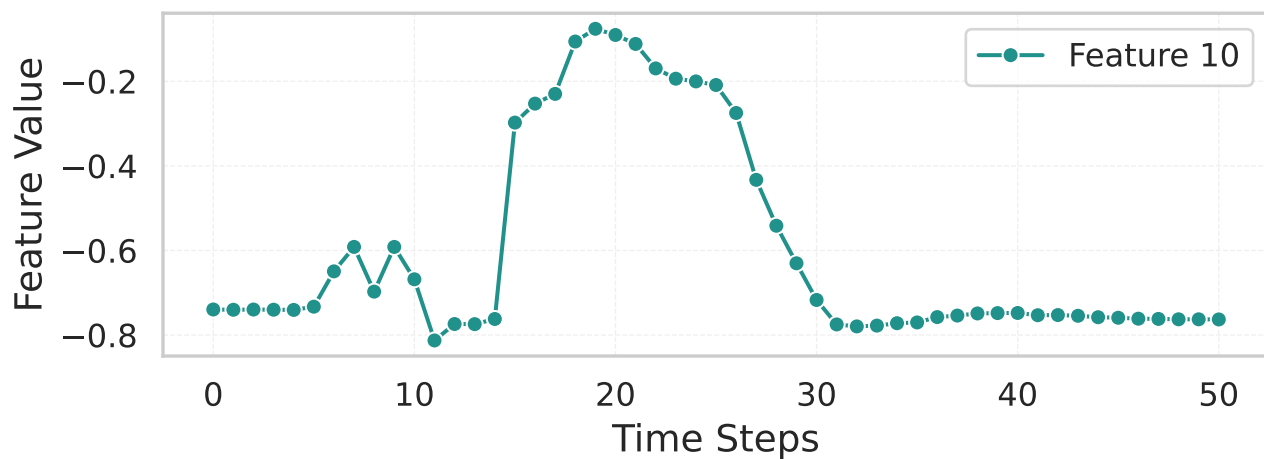

Sample Index: 110

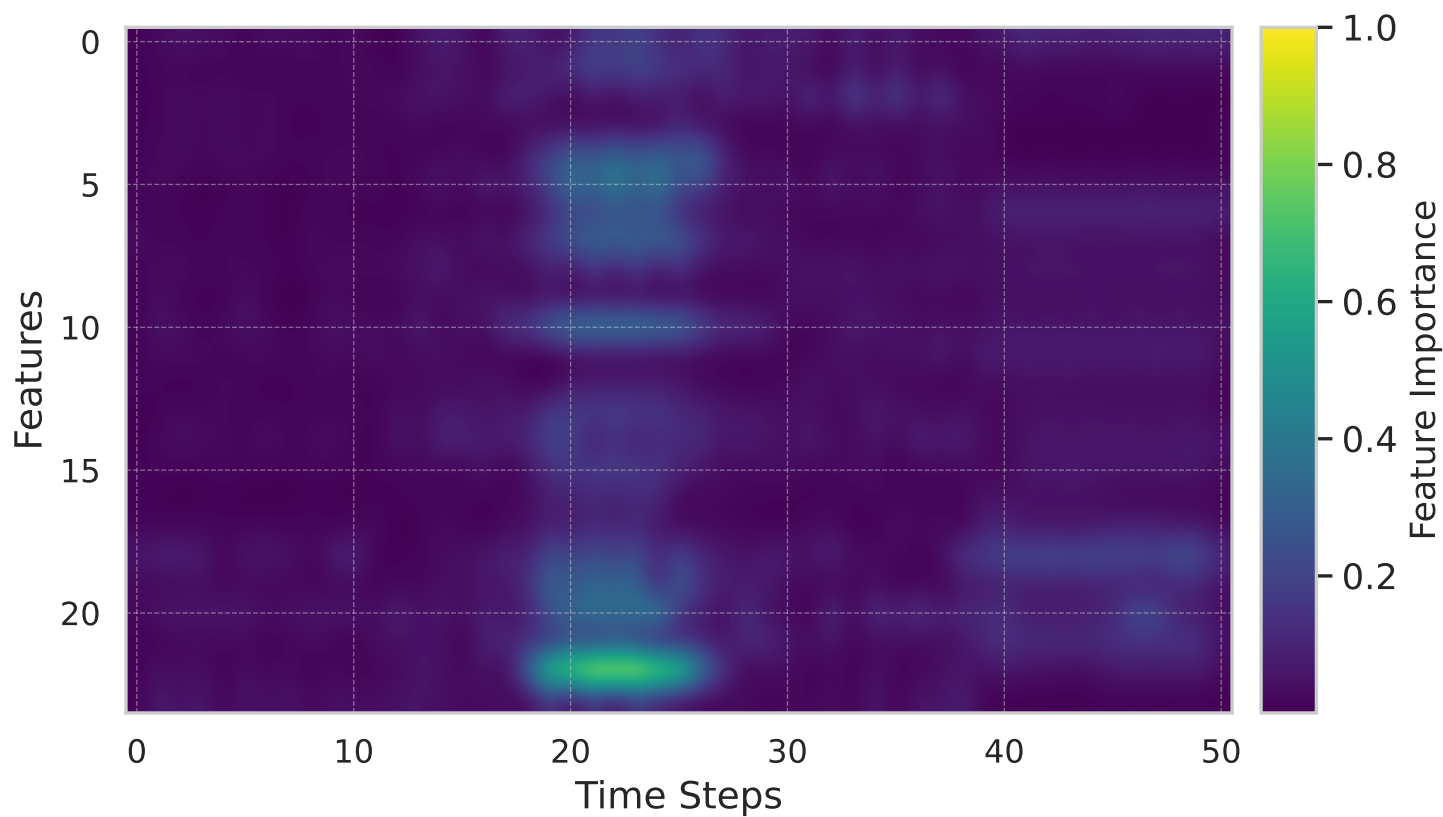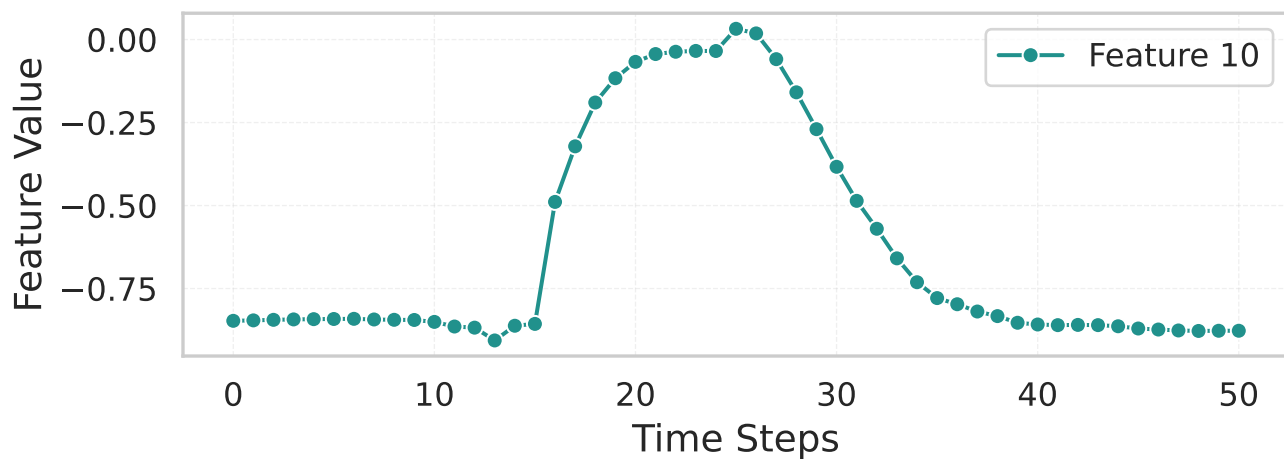

Sample Index: 111

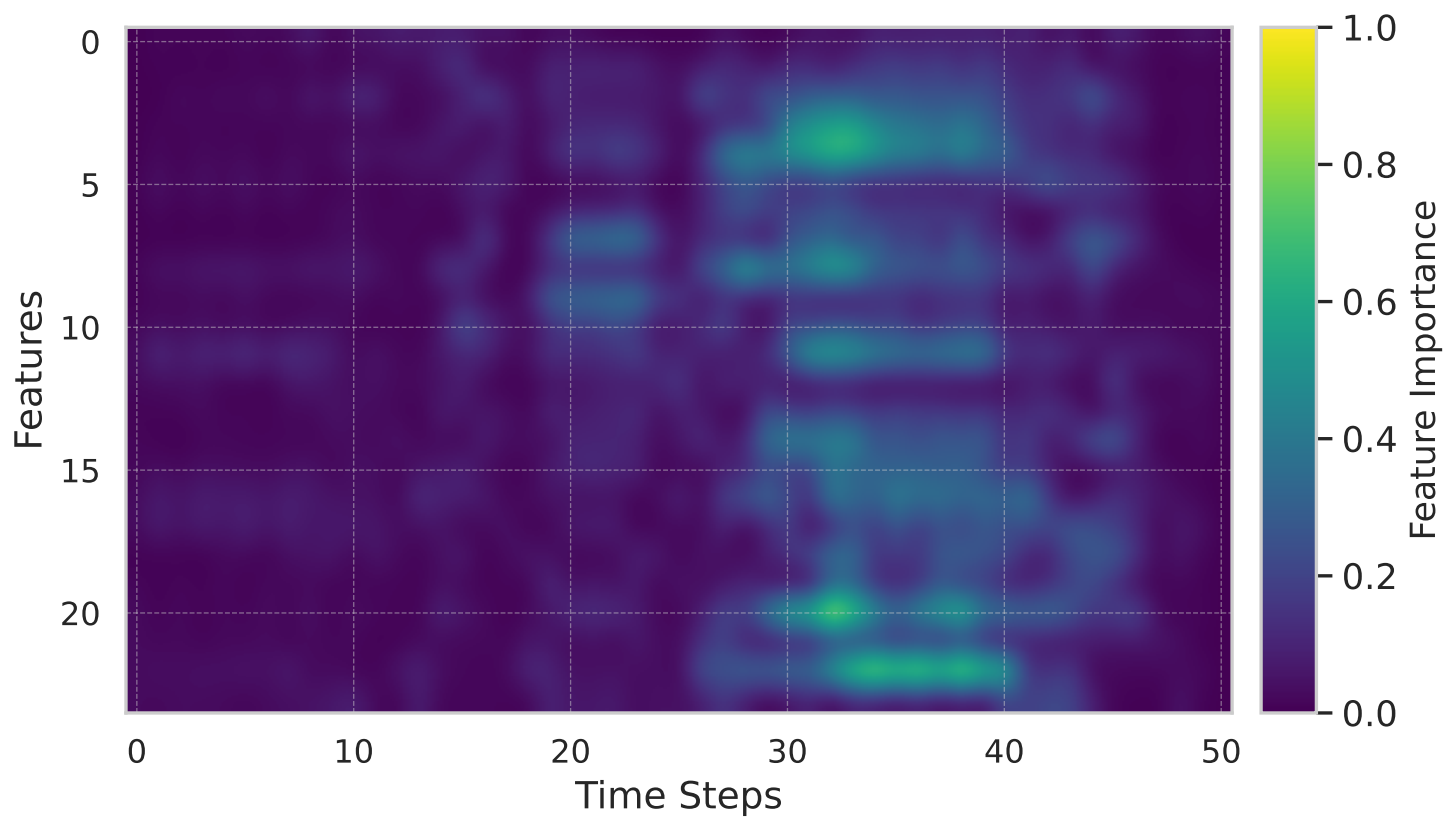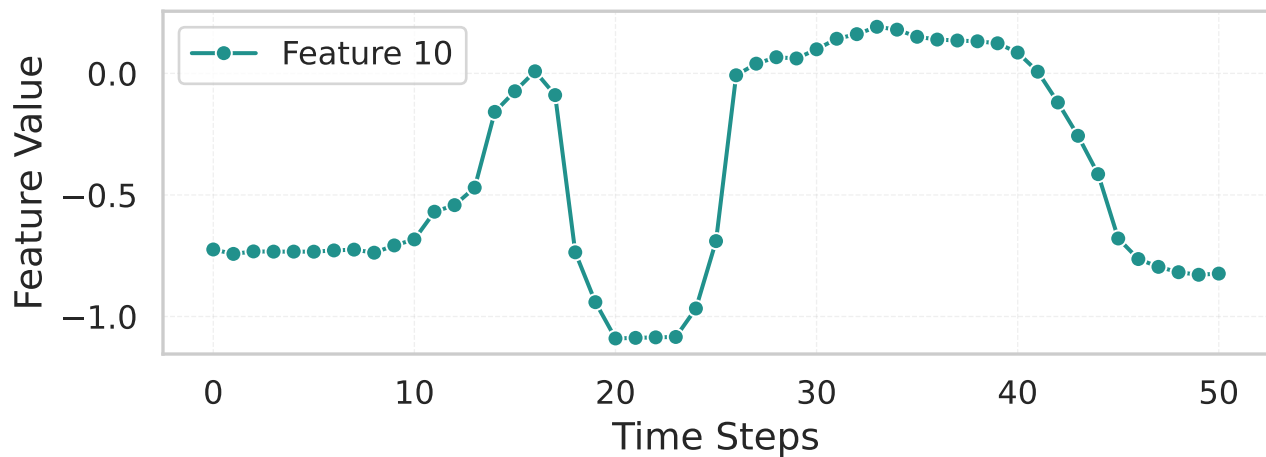

Sample Index: 112

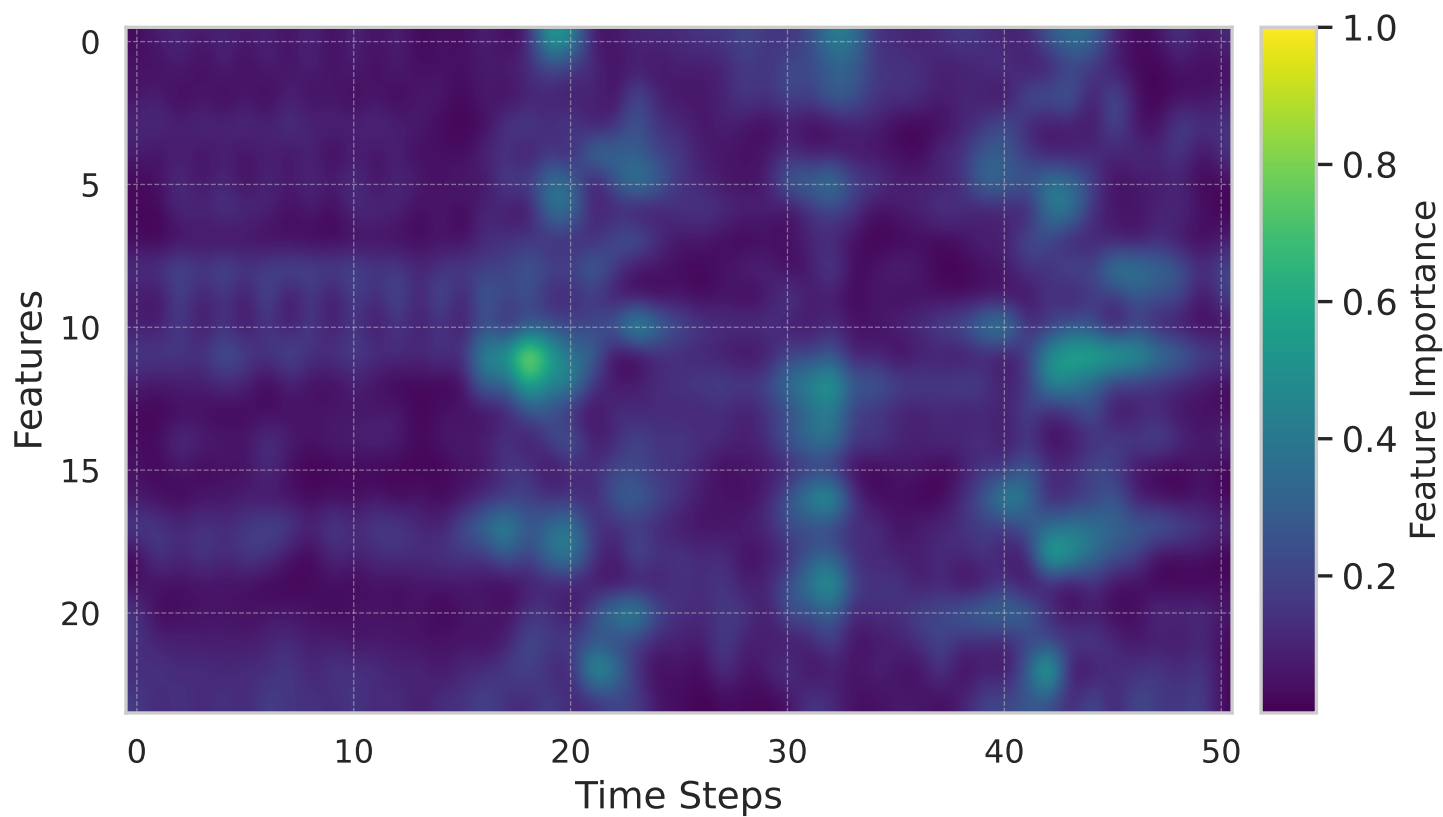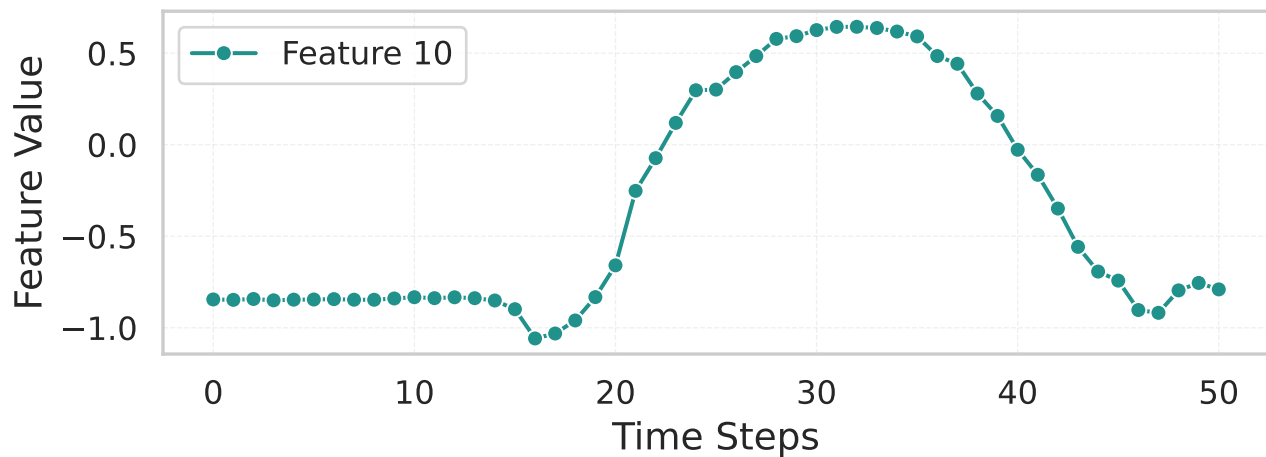

Sample Index: 113

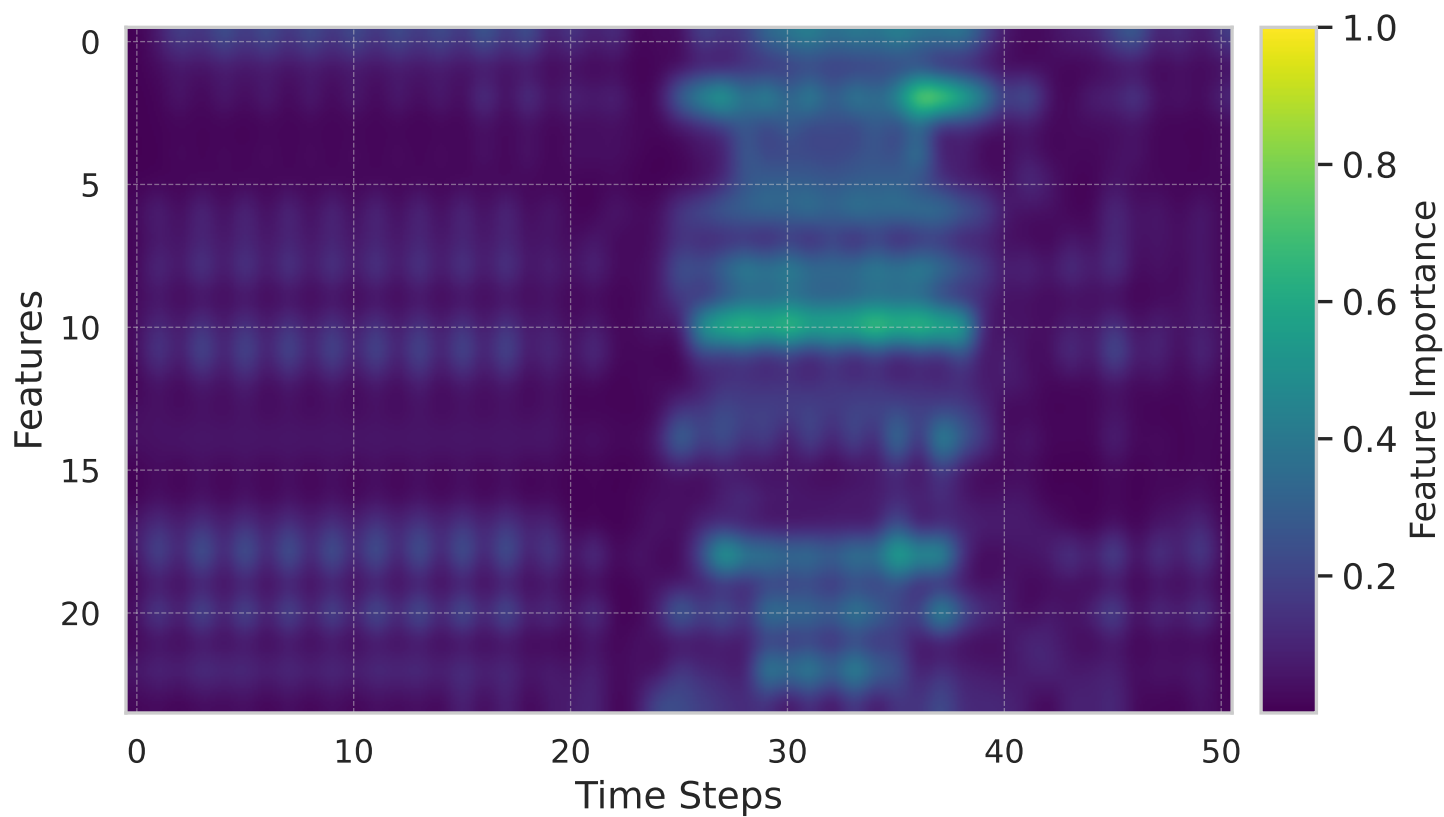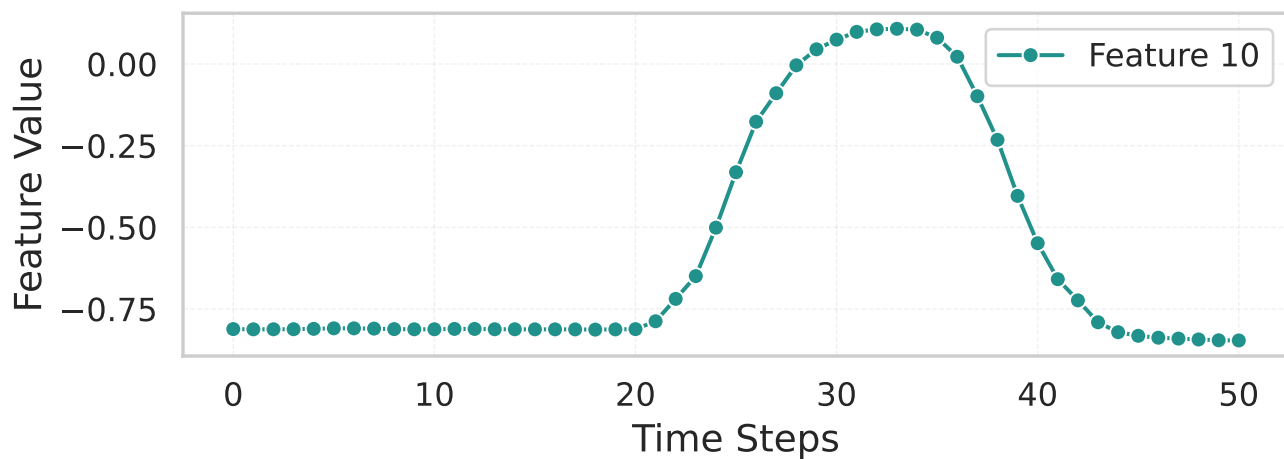

Sample Index: 114

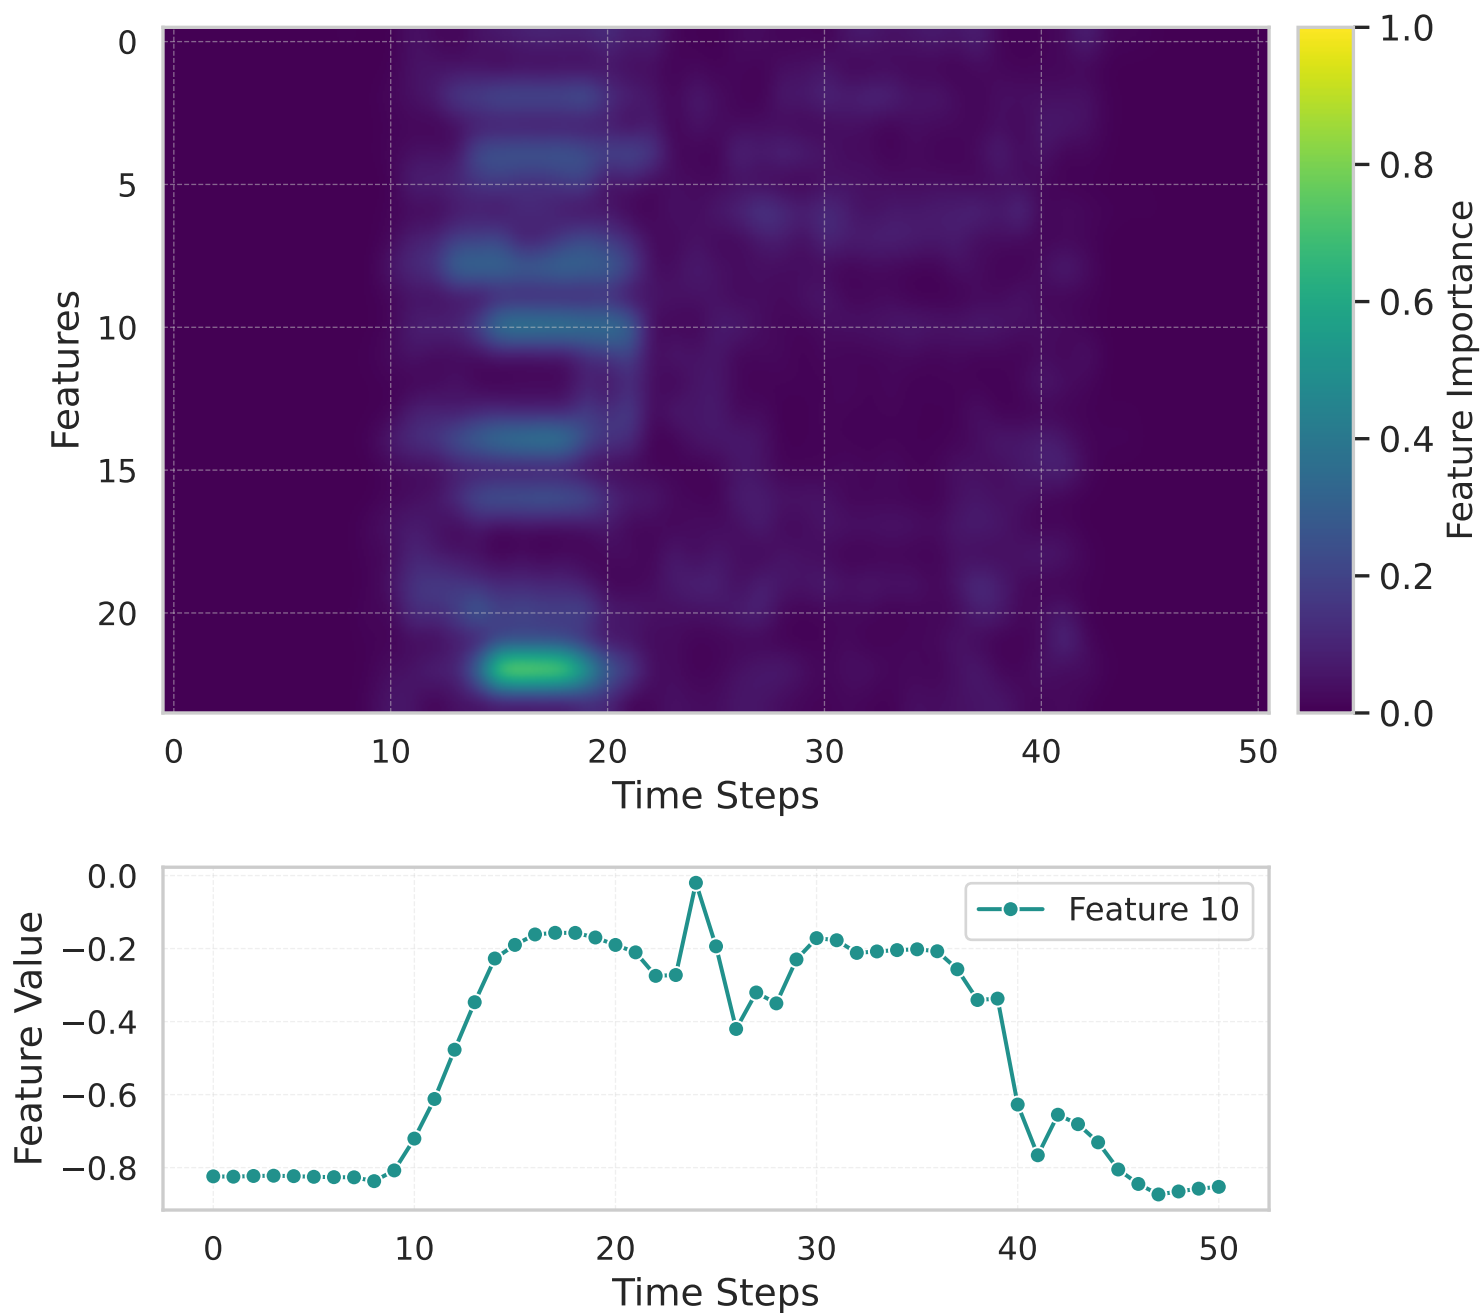

Sample Index: 115

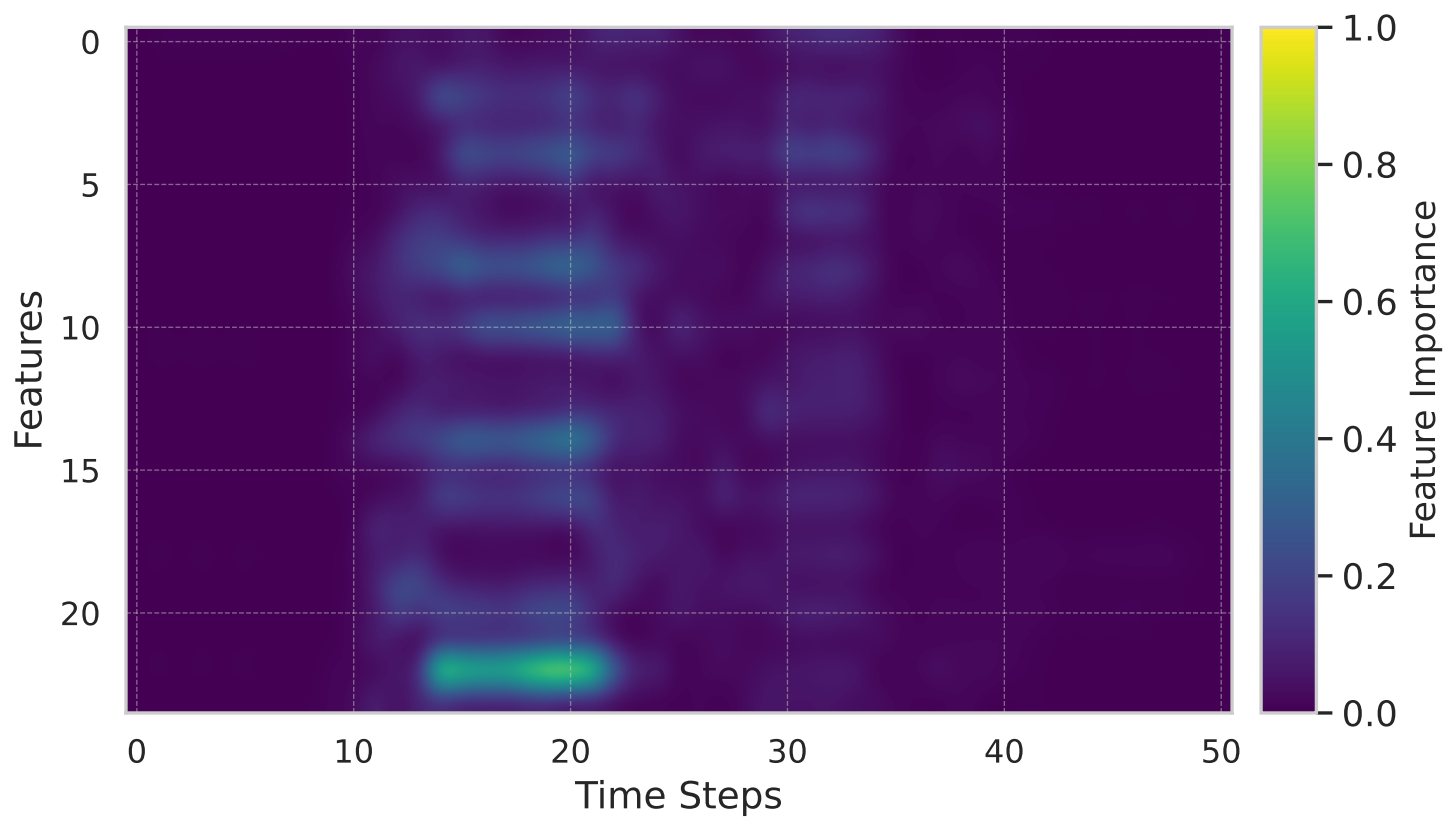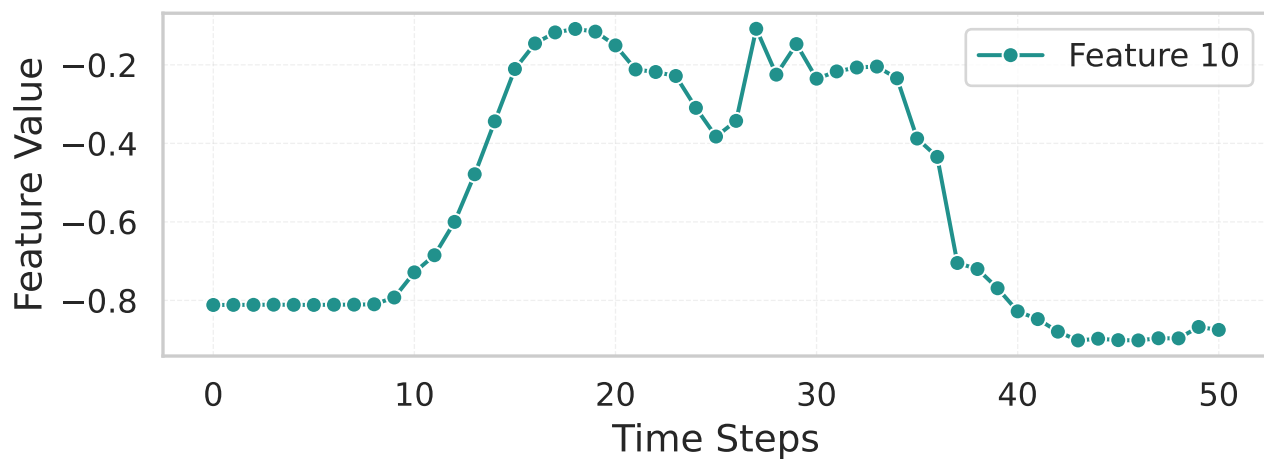



Sample Index: 116

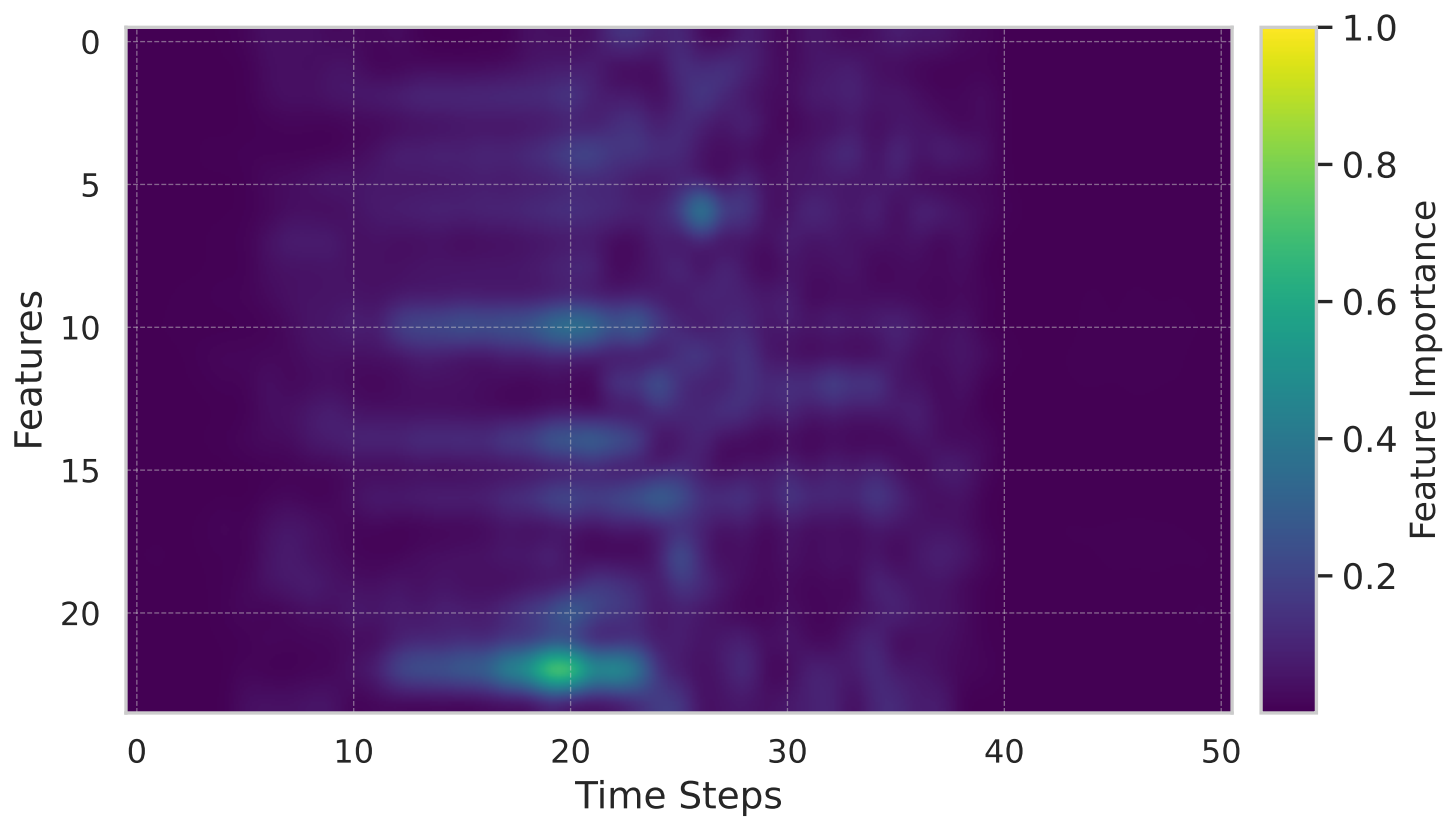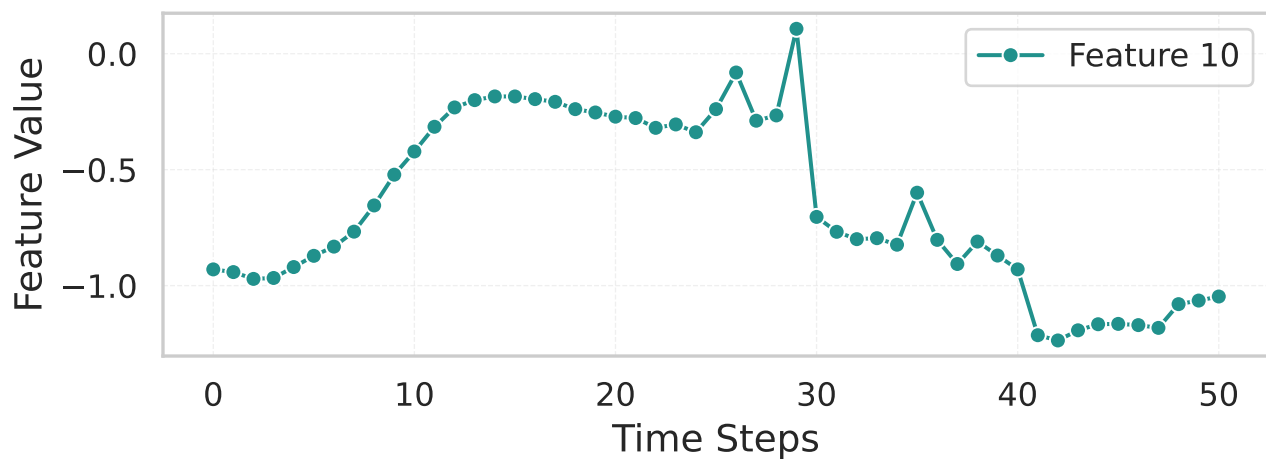

Sample Index: 117

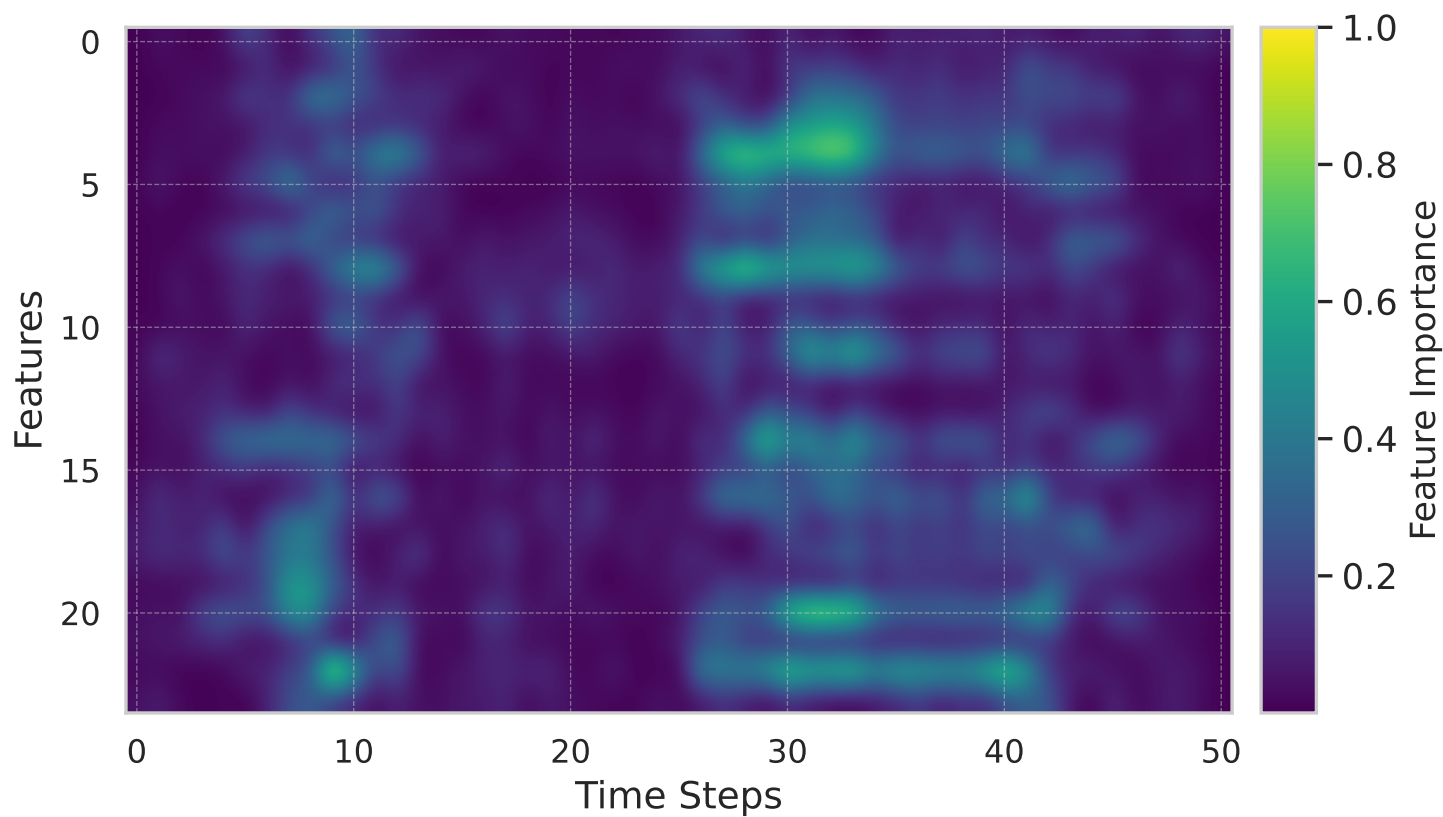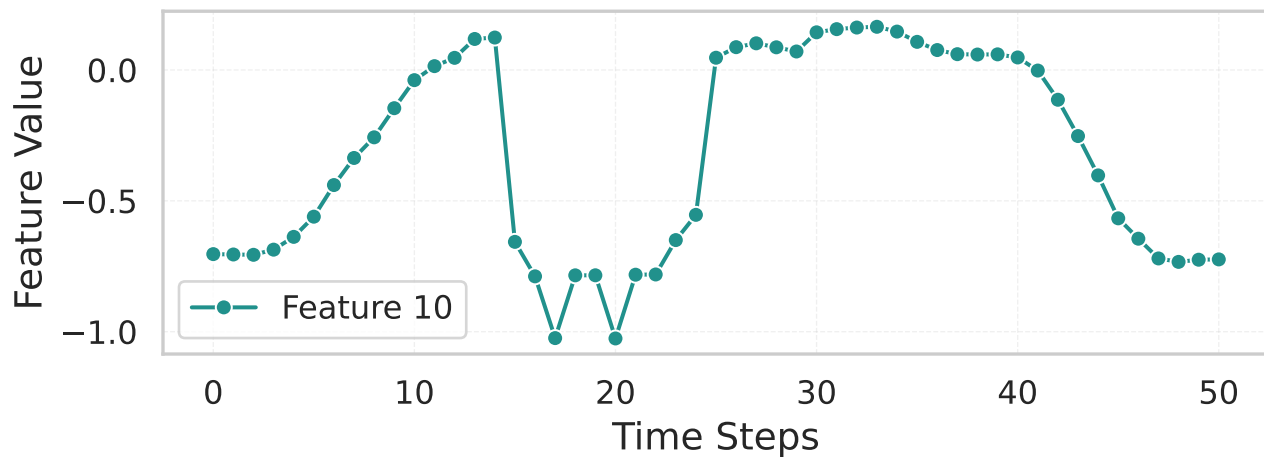

Sample Index: 118

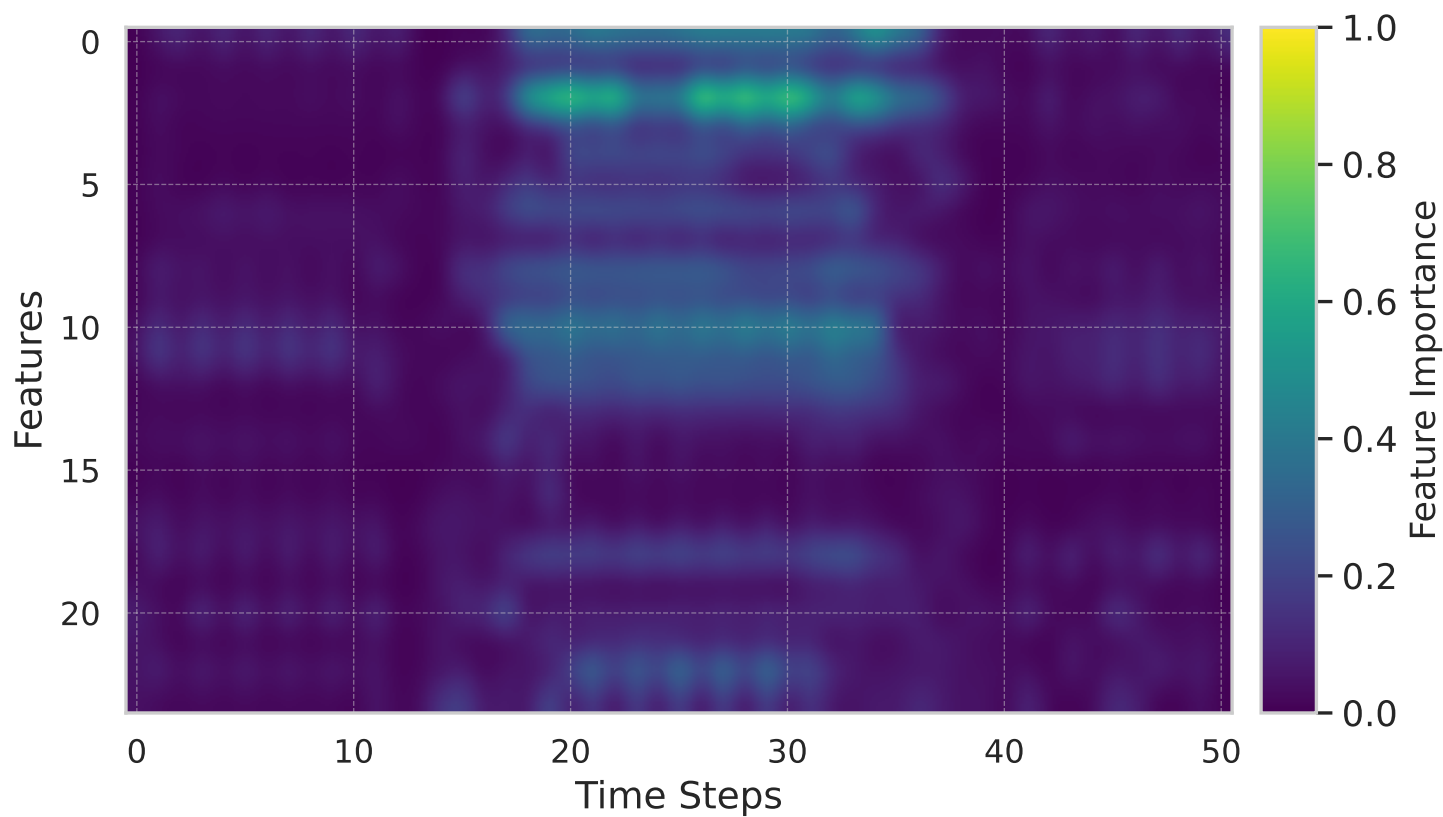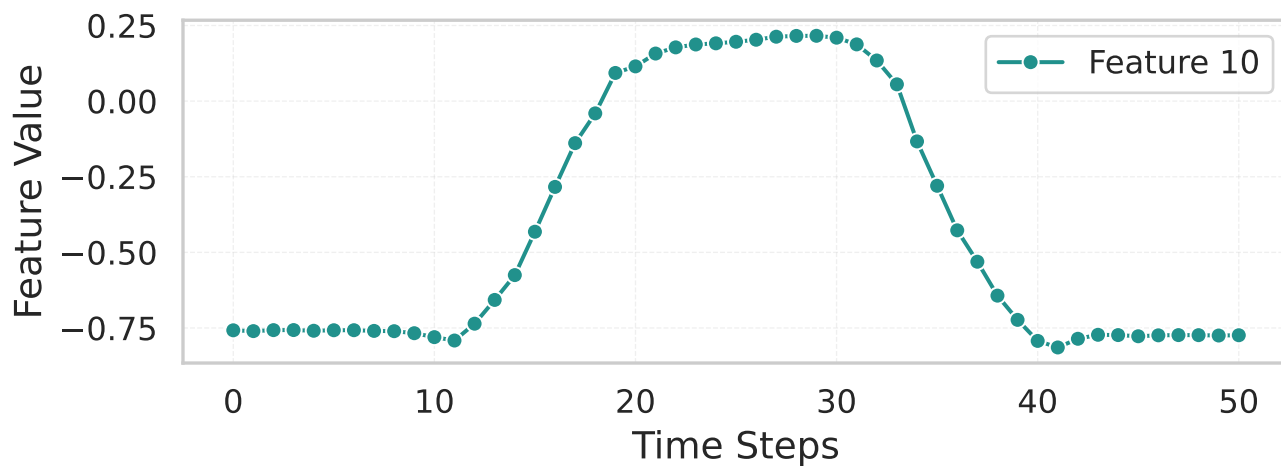

Sample Index: 119

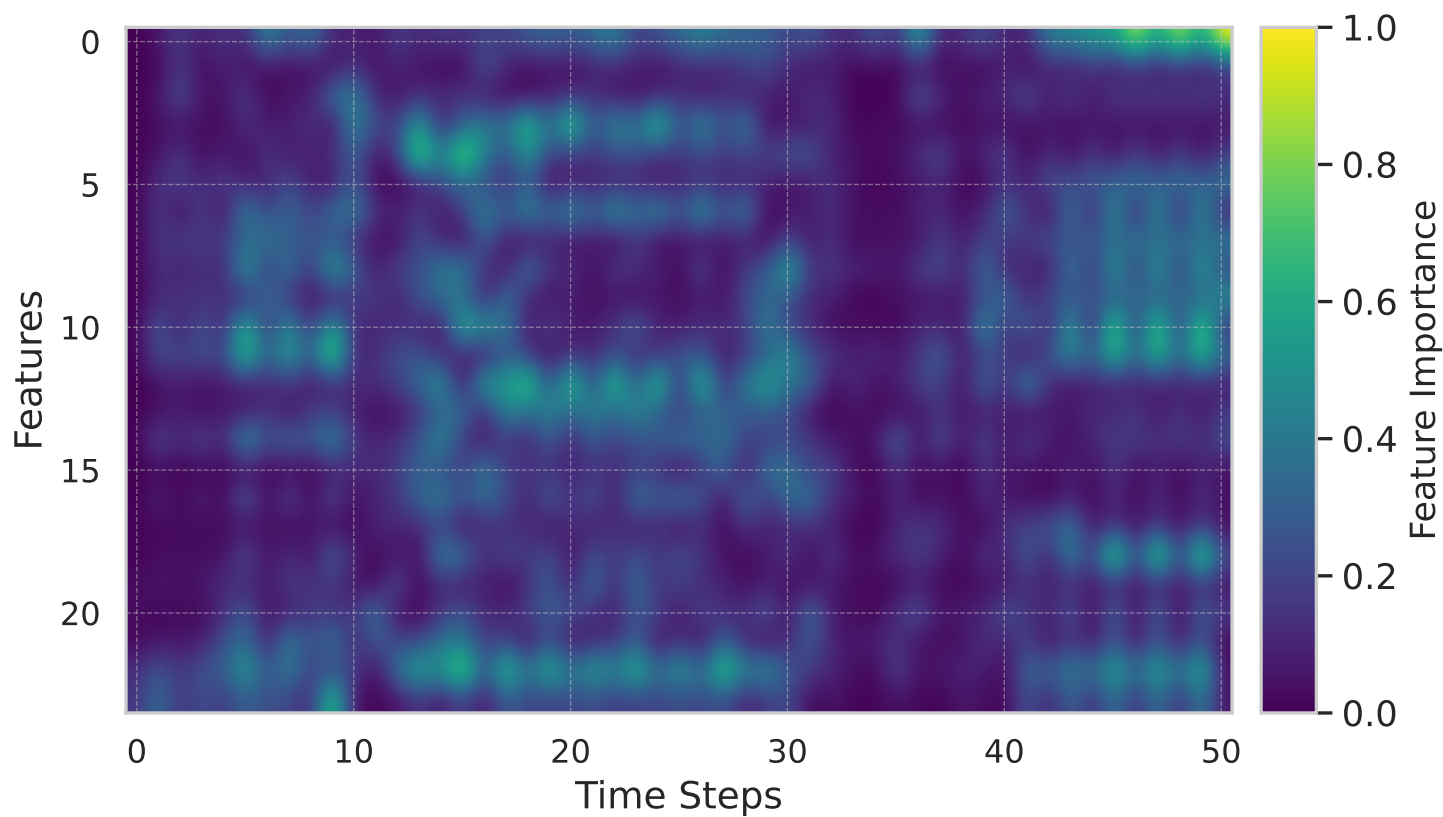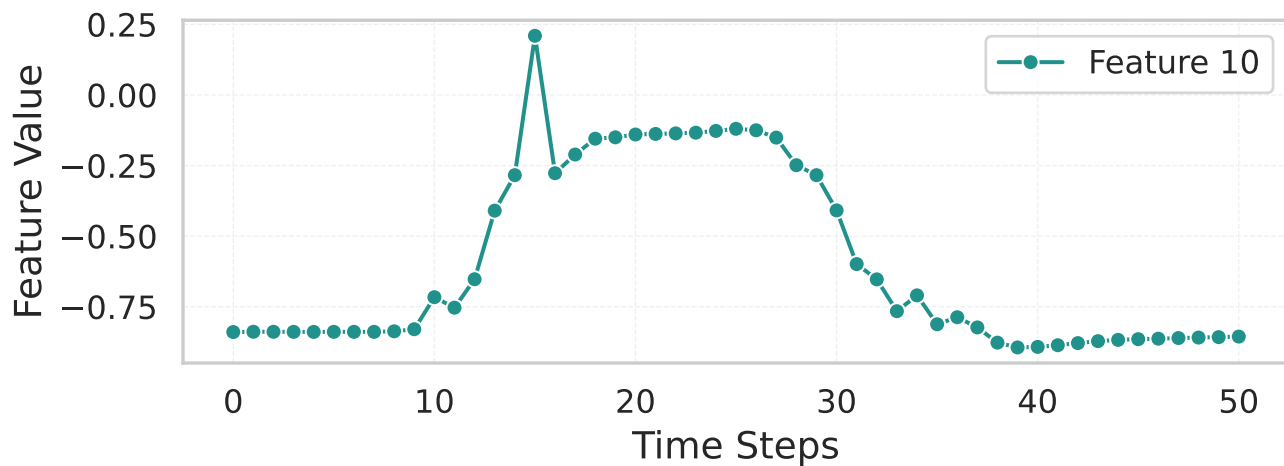

Sample Index: 120

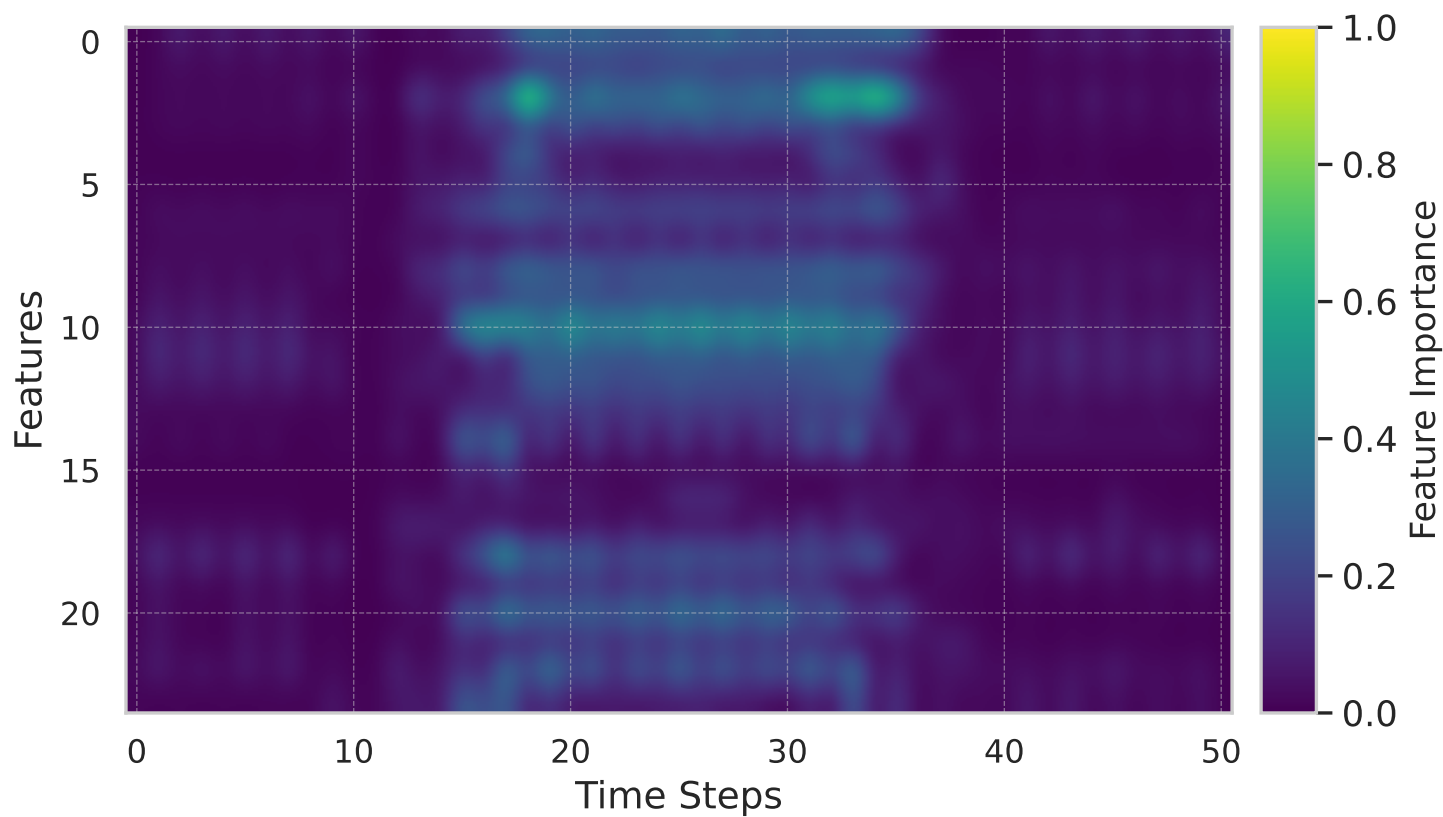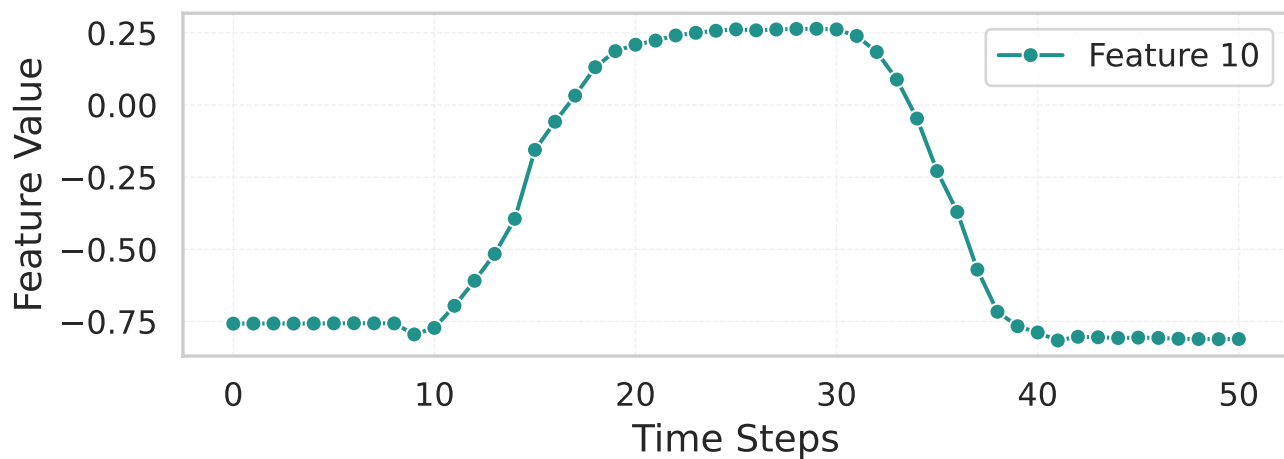

Sample Index: 121

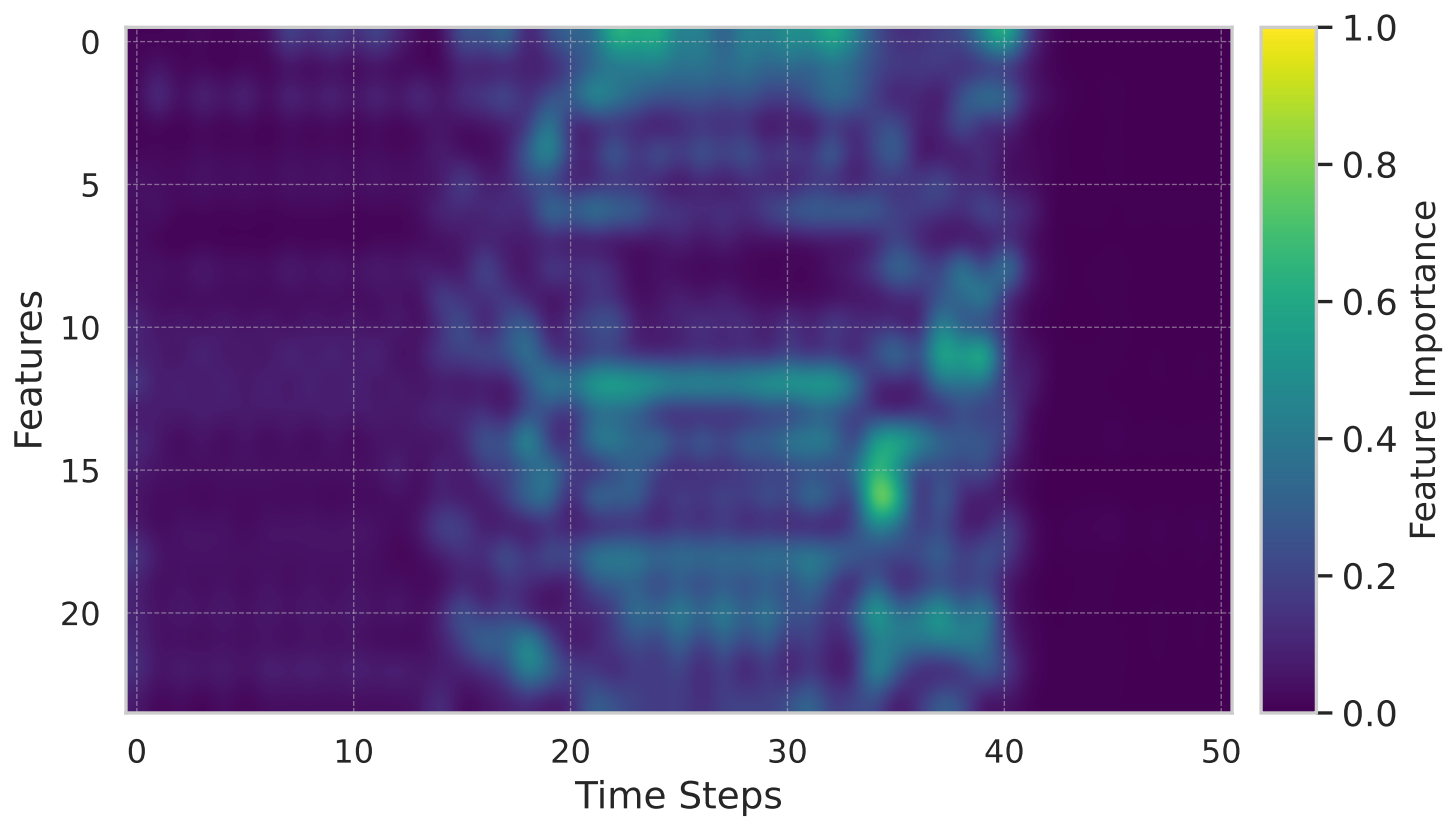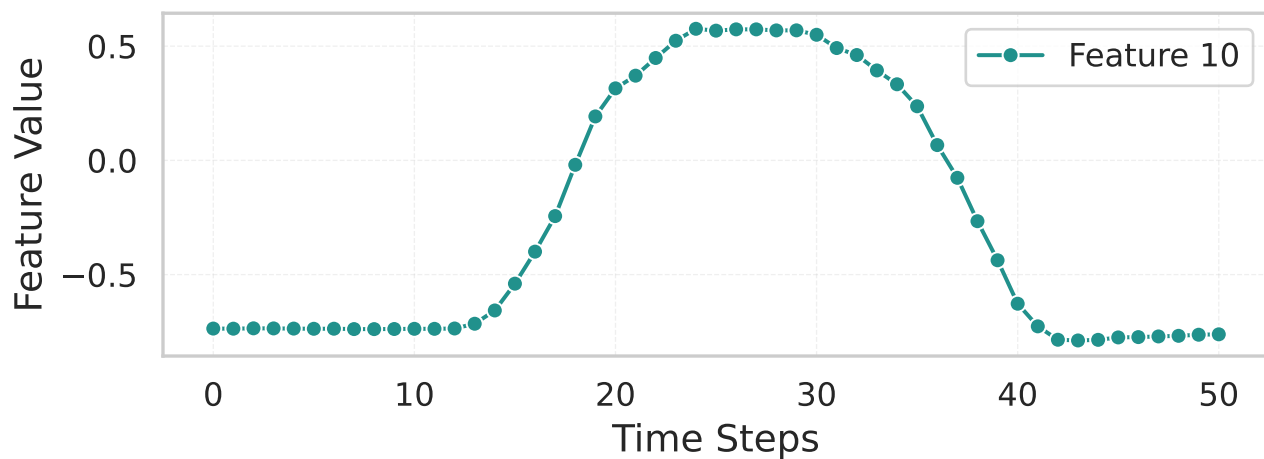

Sample Index: 122

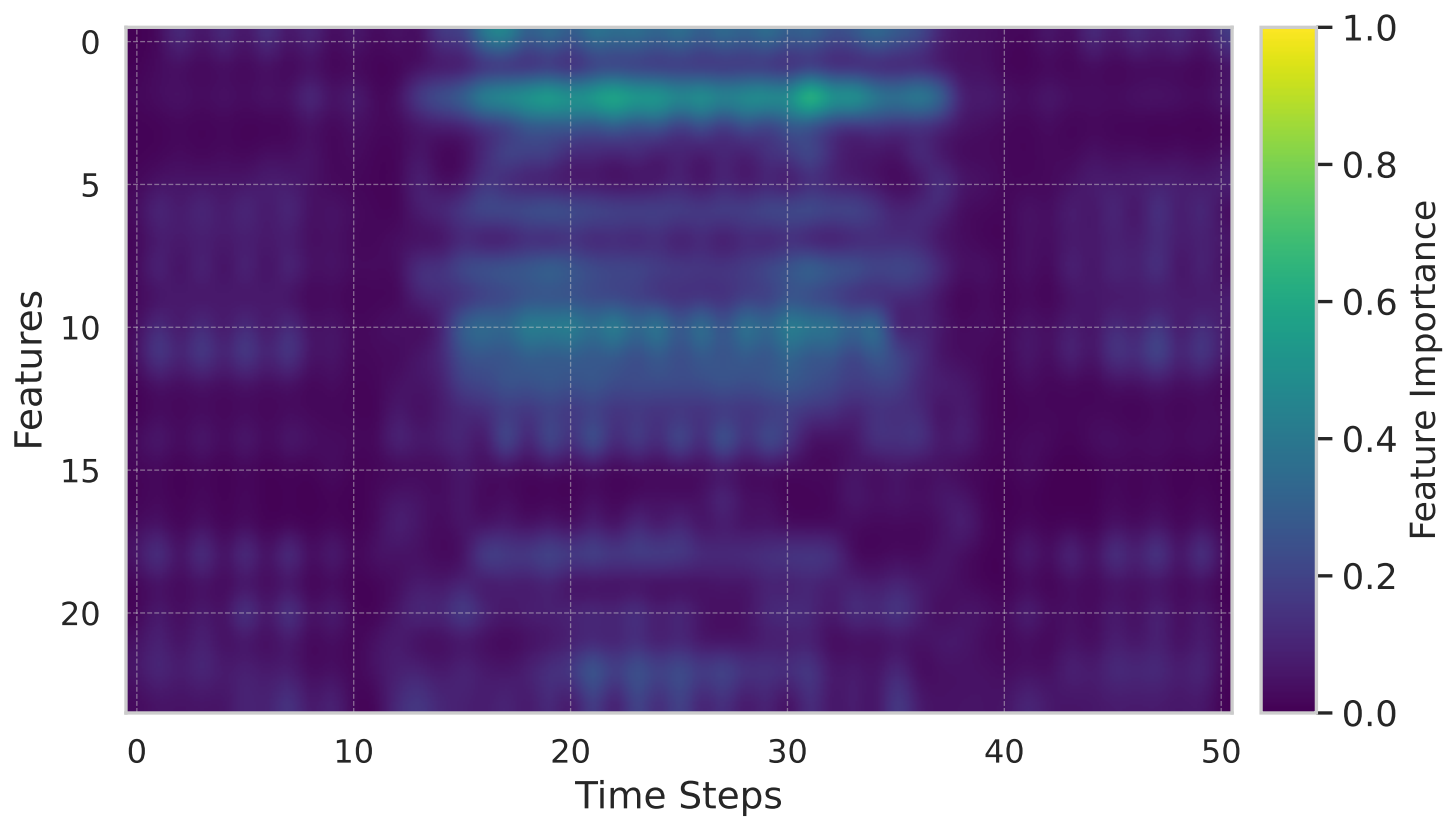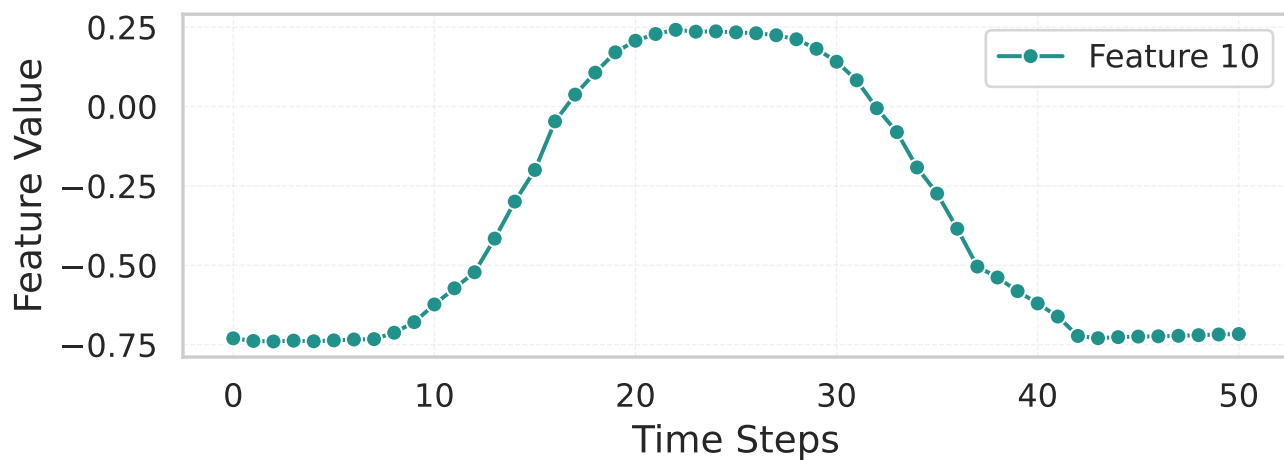

Sample Index: 123

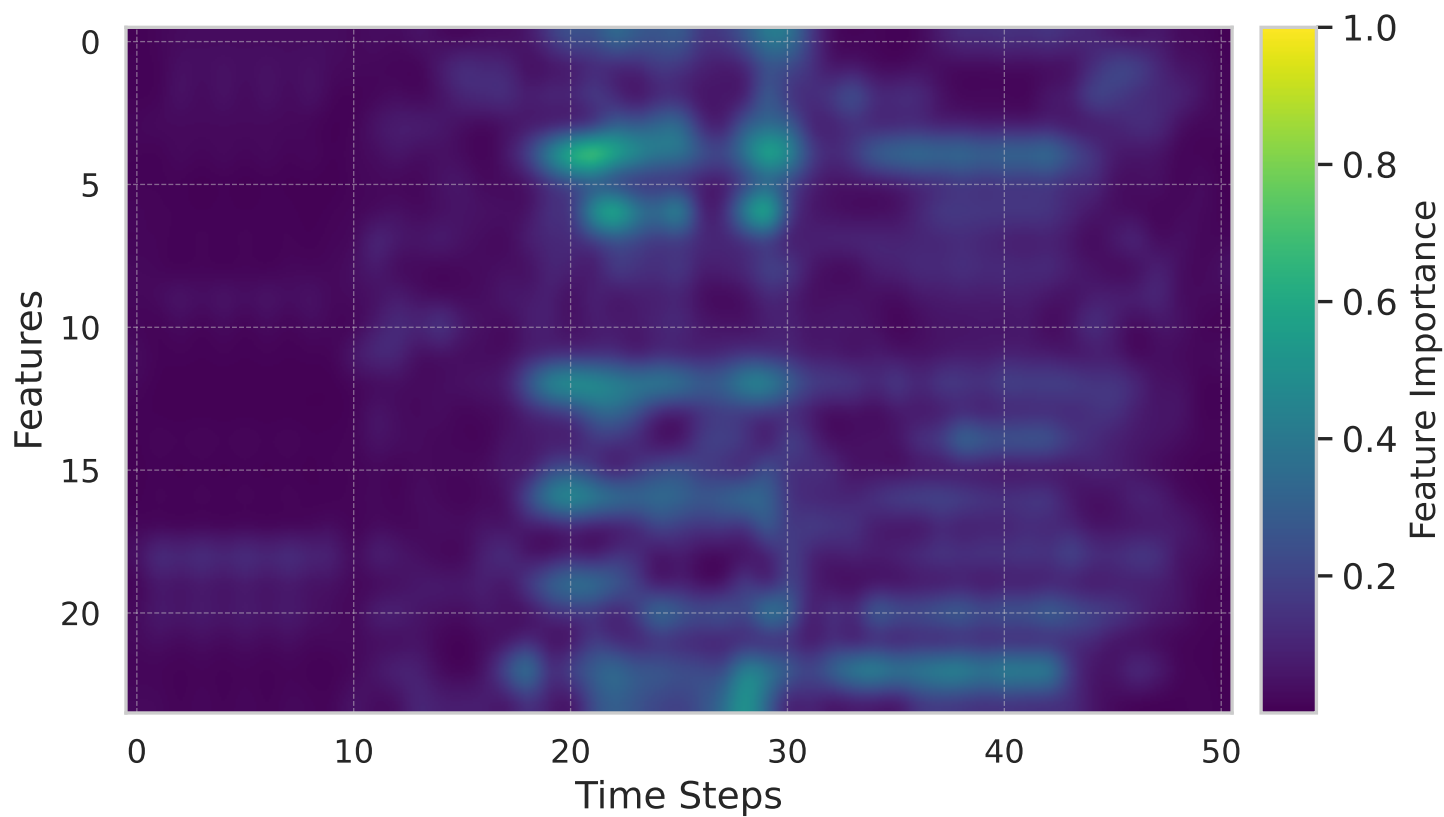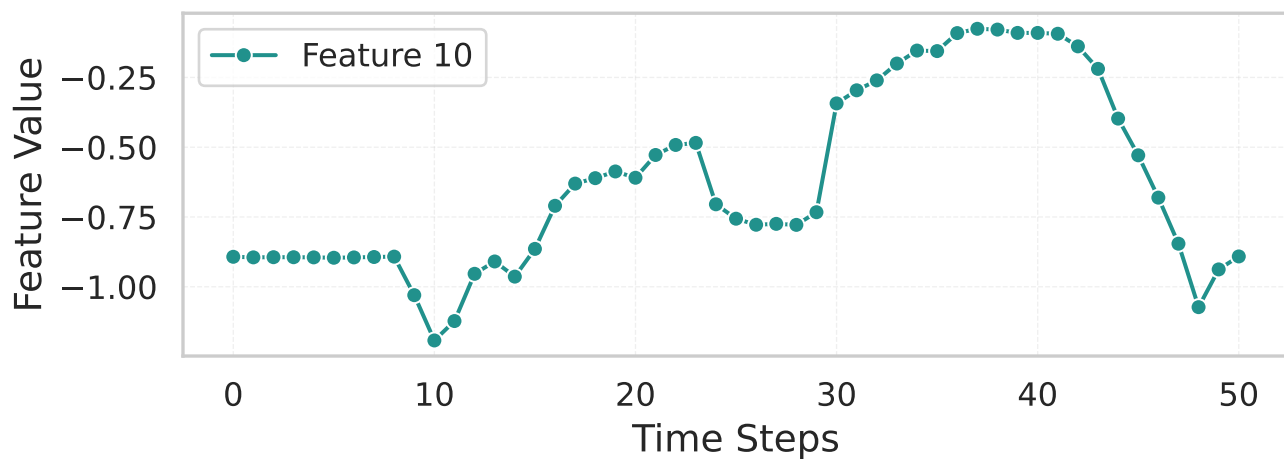



Sample Index: 124

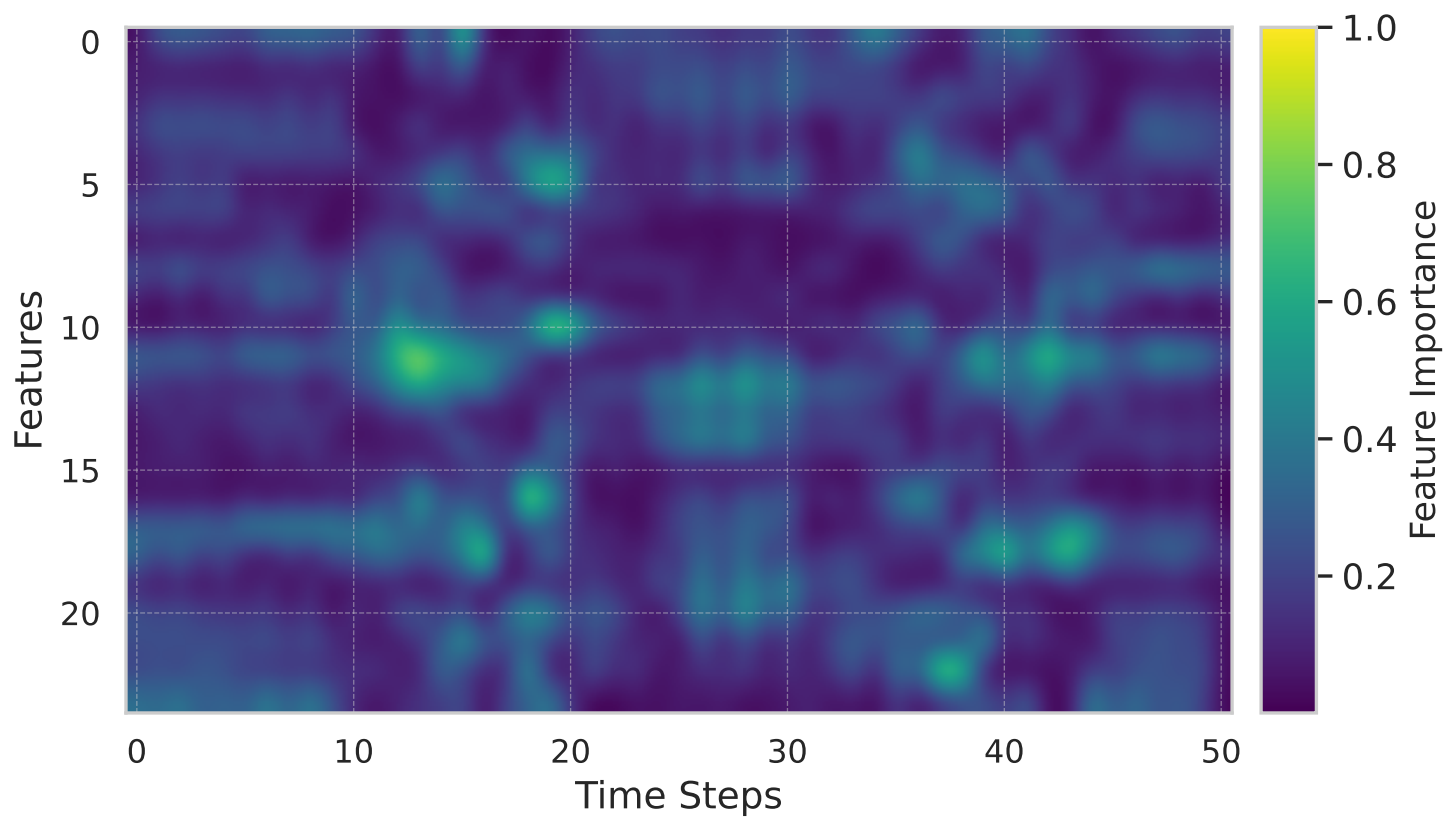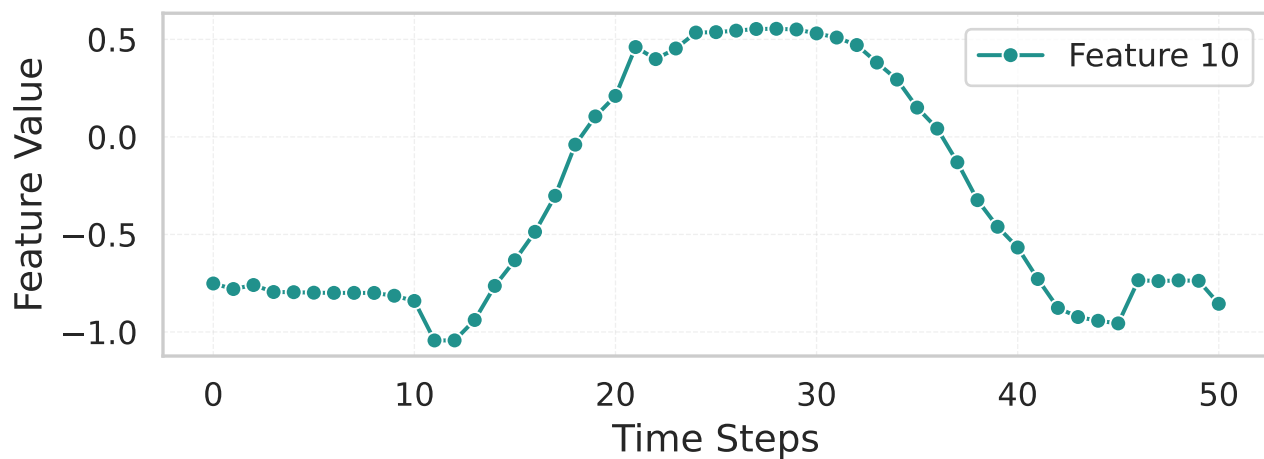

Sample Index: 125

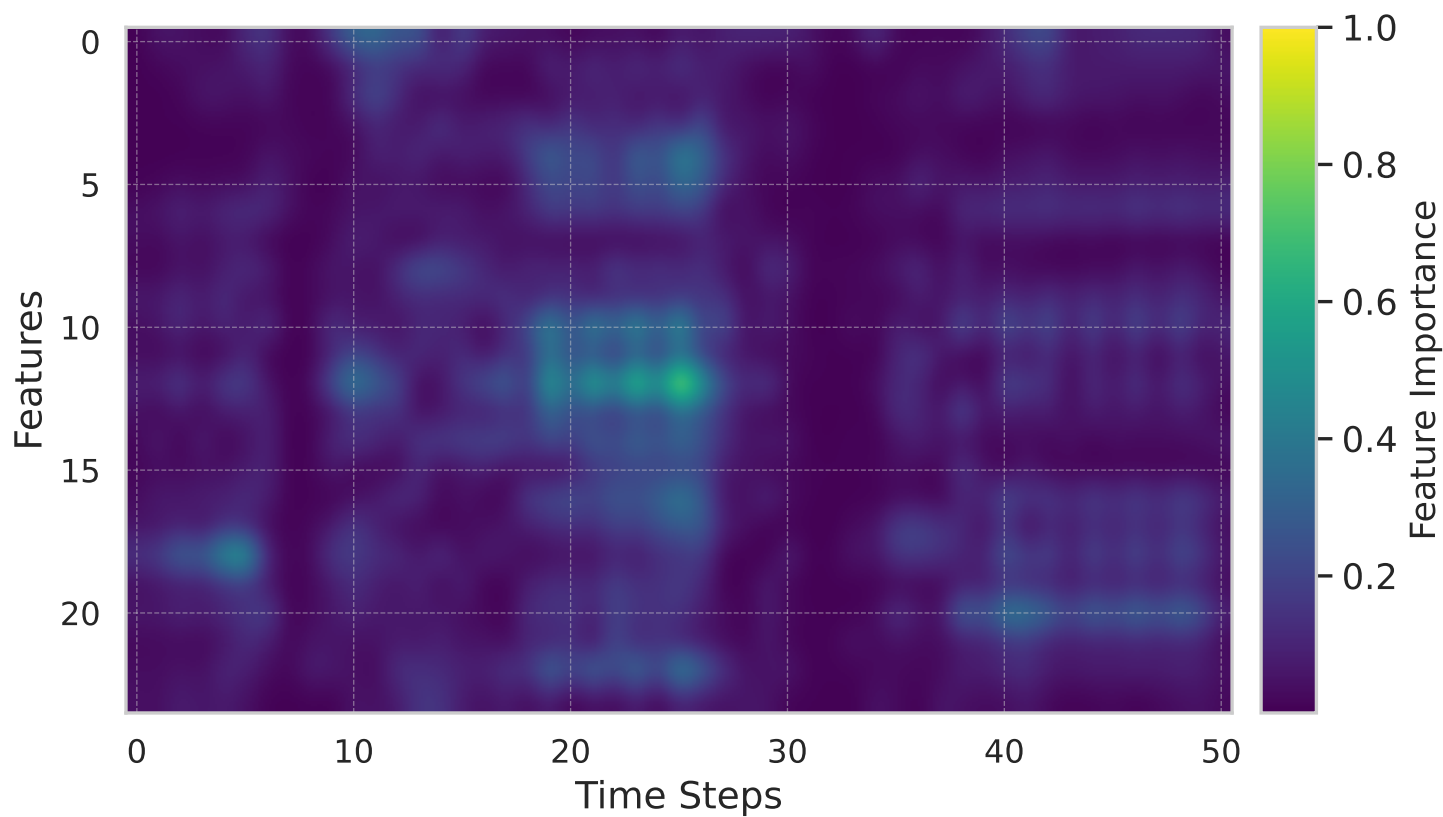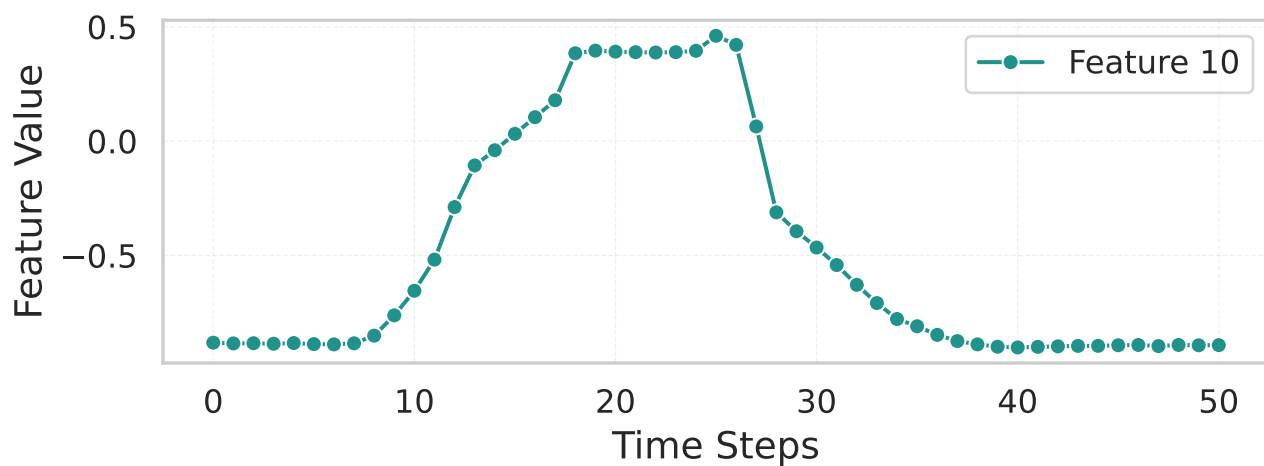

Sample Index: 126

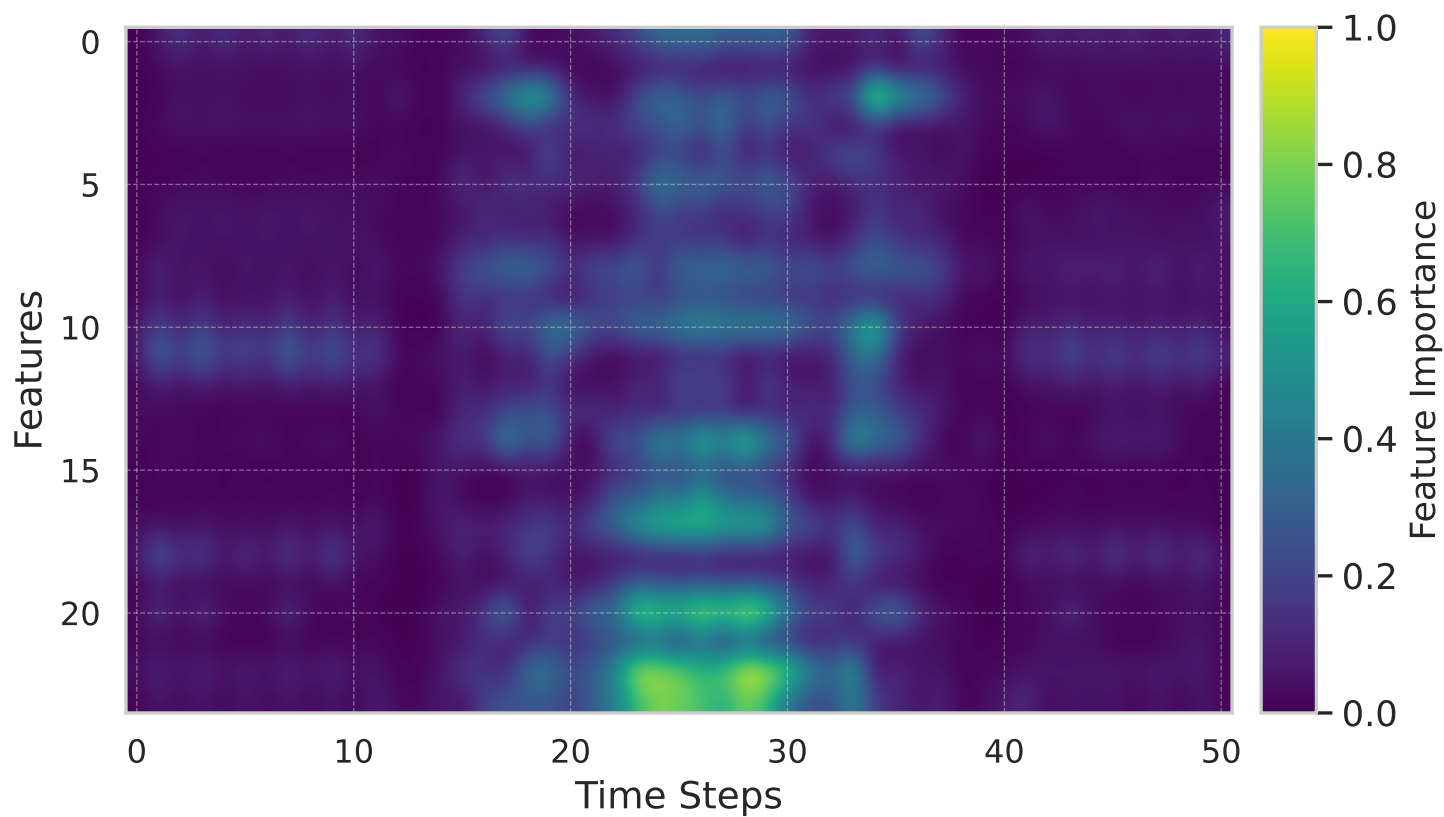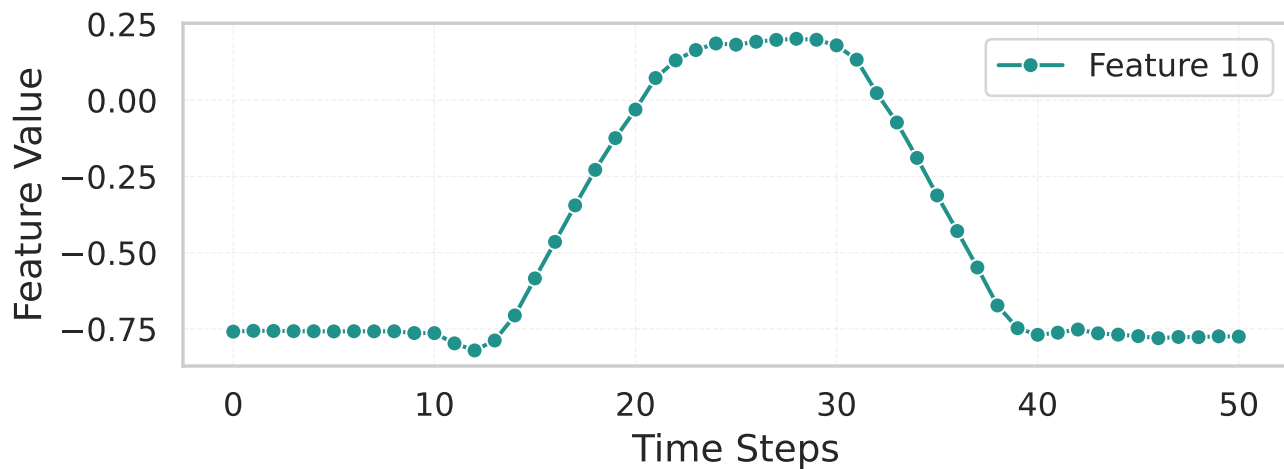

Sample Index: 127

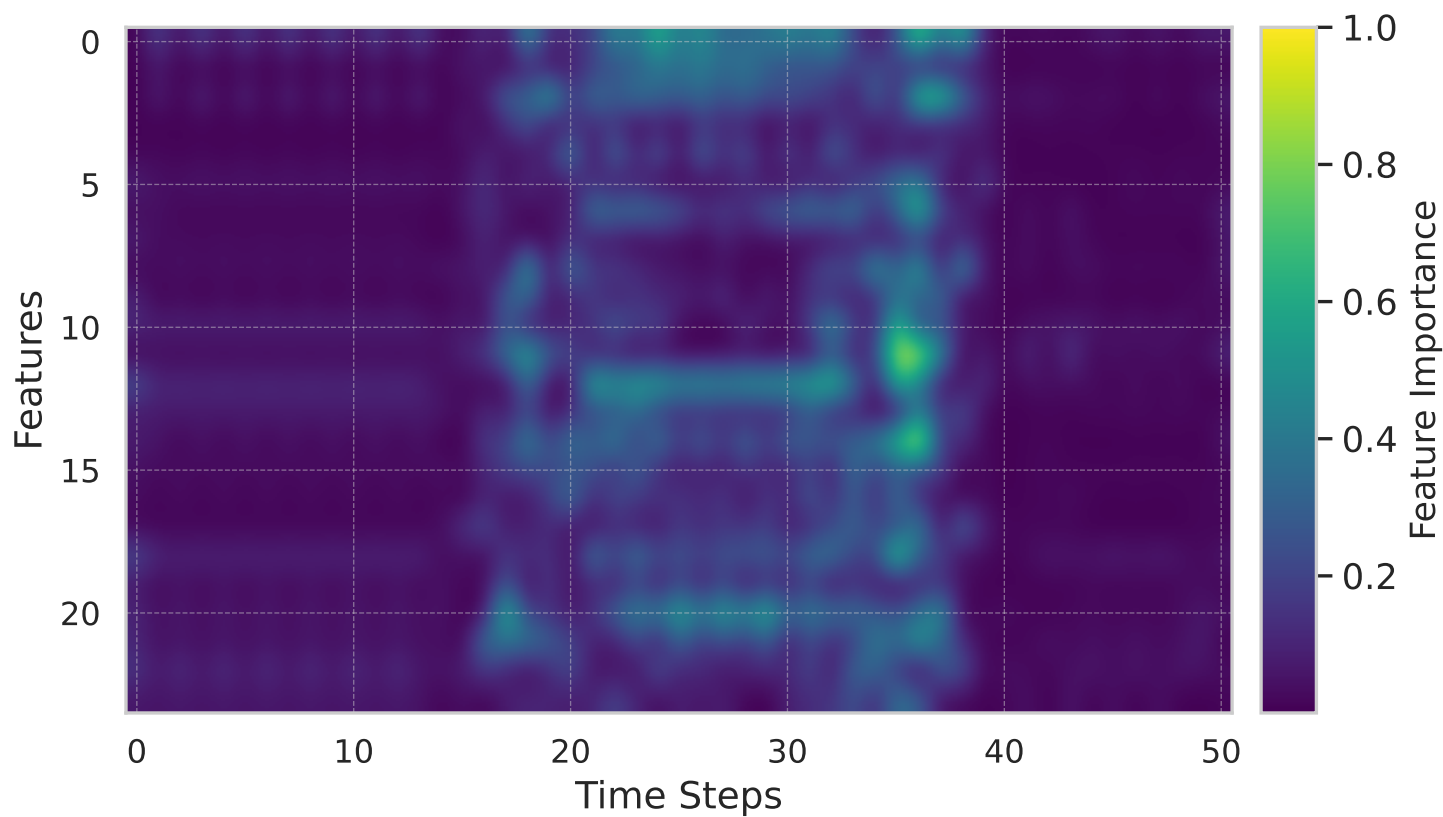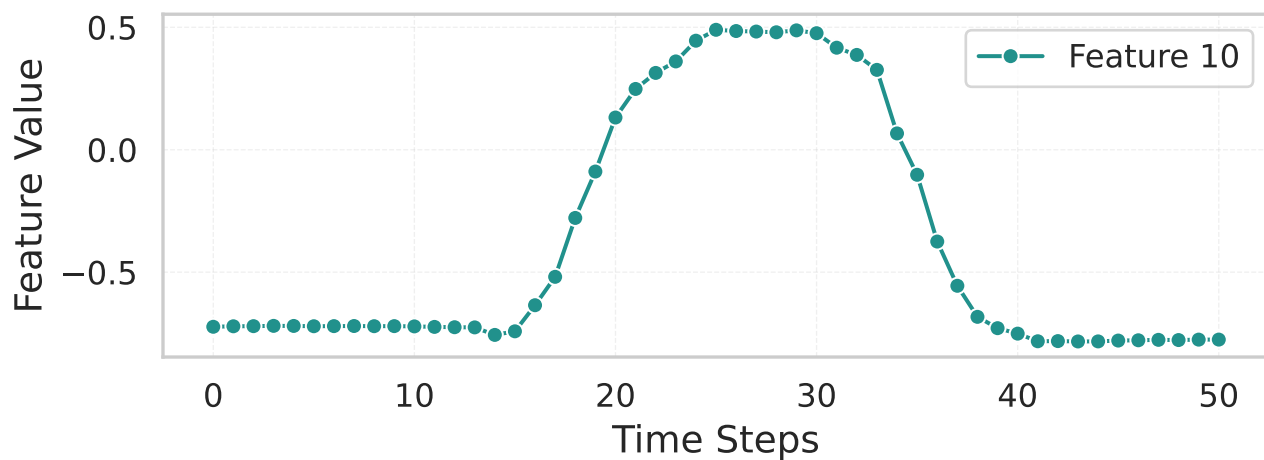

Sample Index: 128

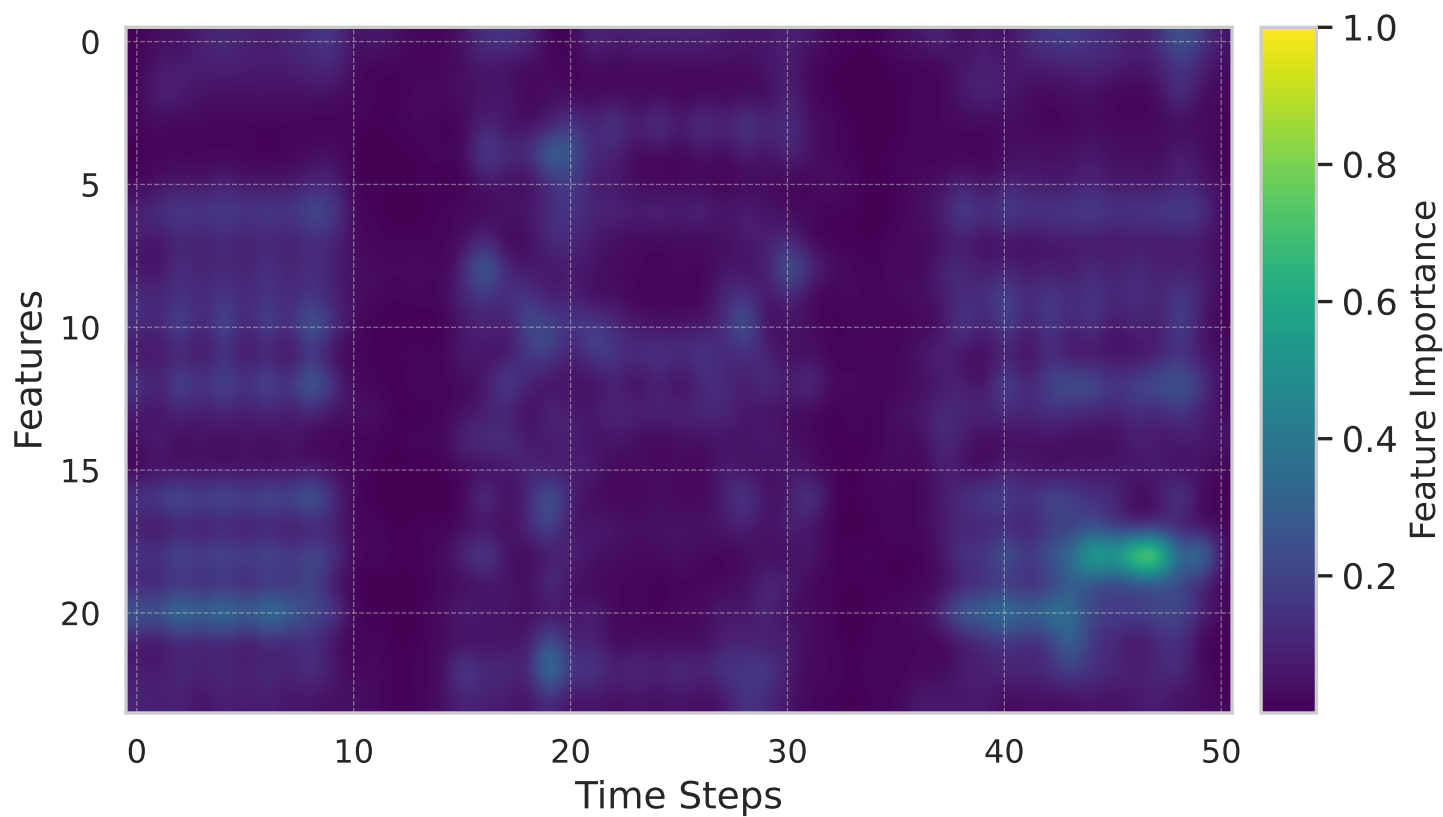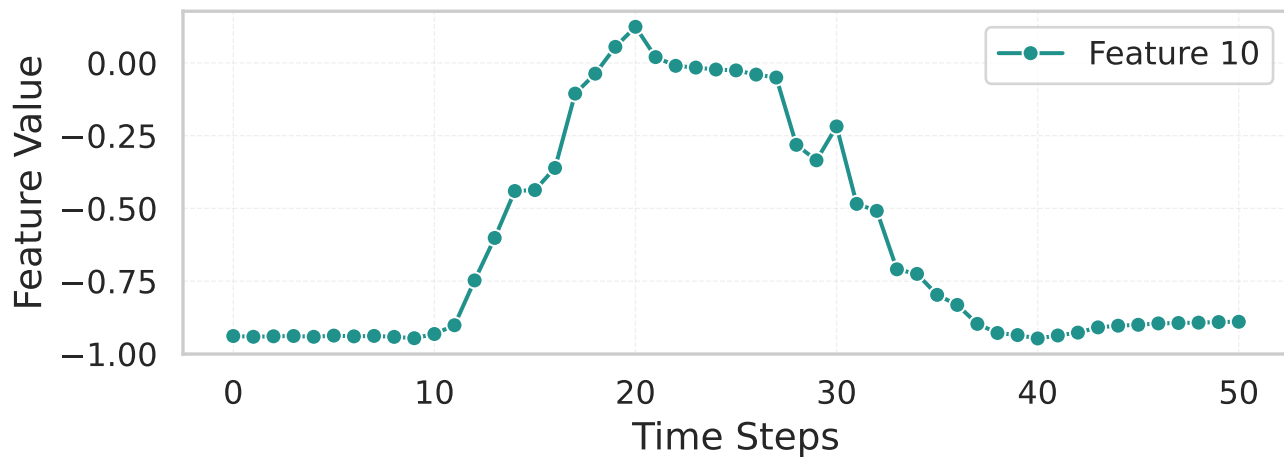

Sample Index: 129

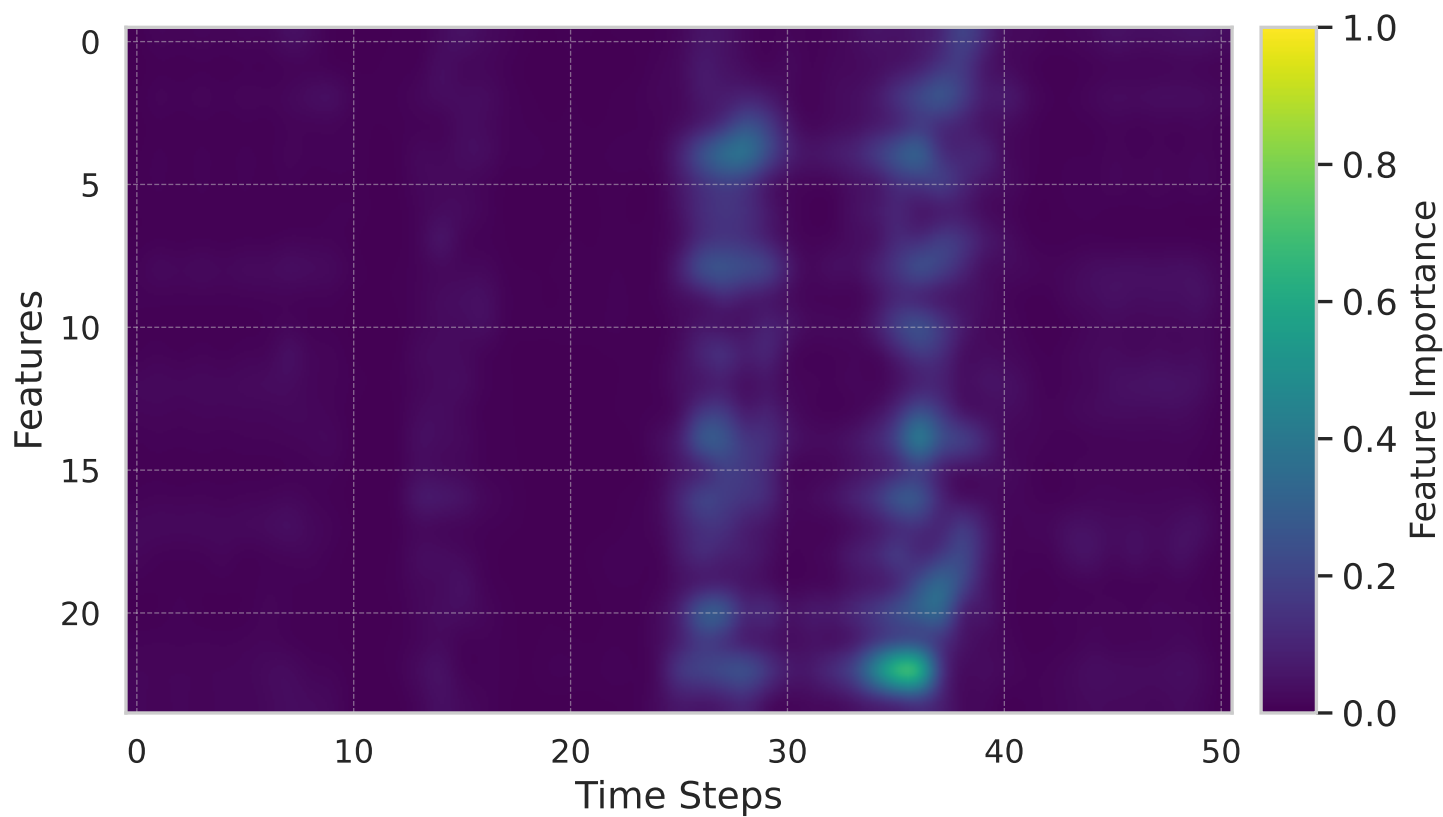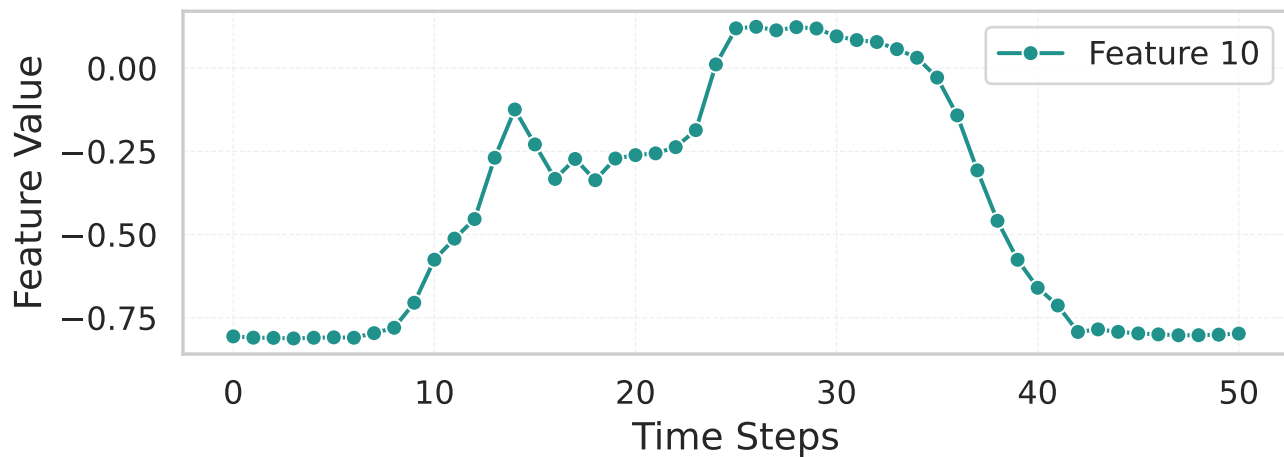

Sample Index: 130

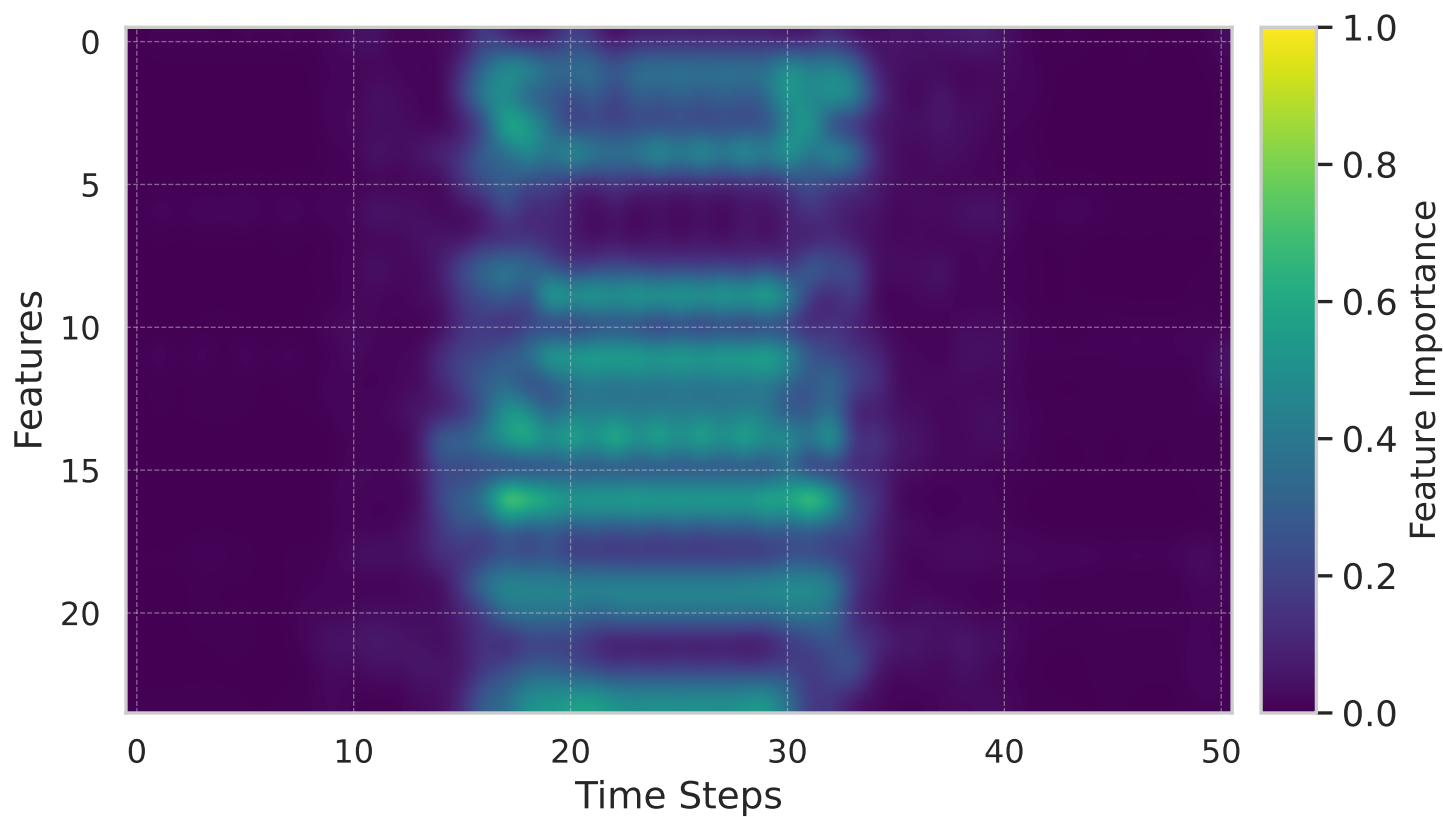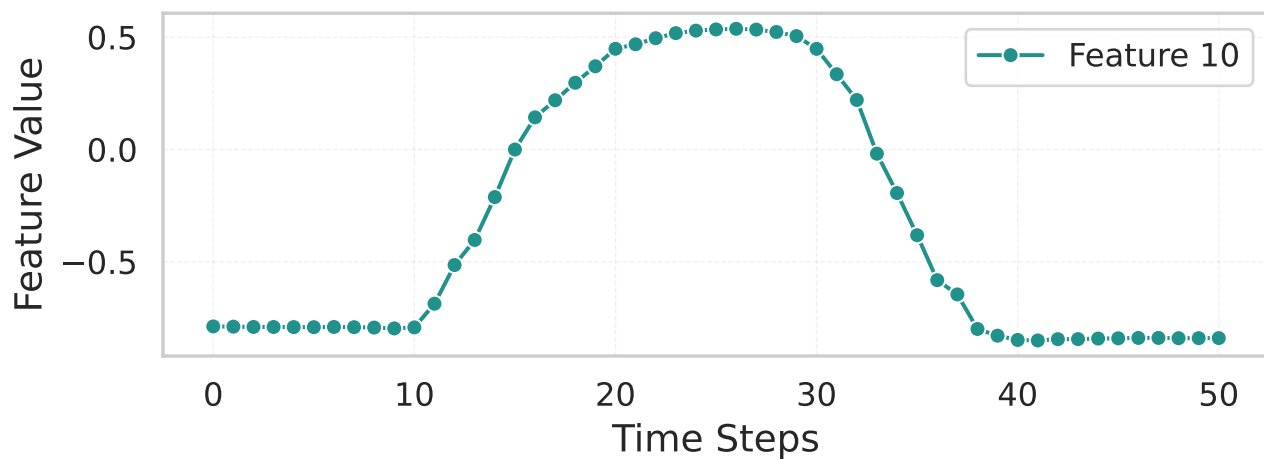

Sample Index: 131

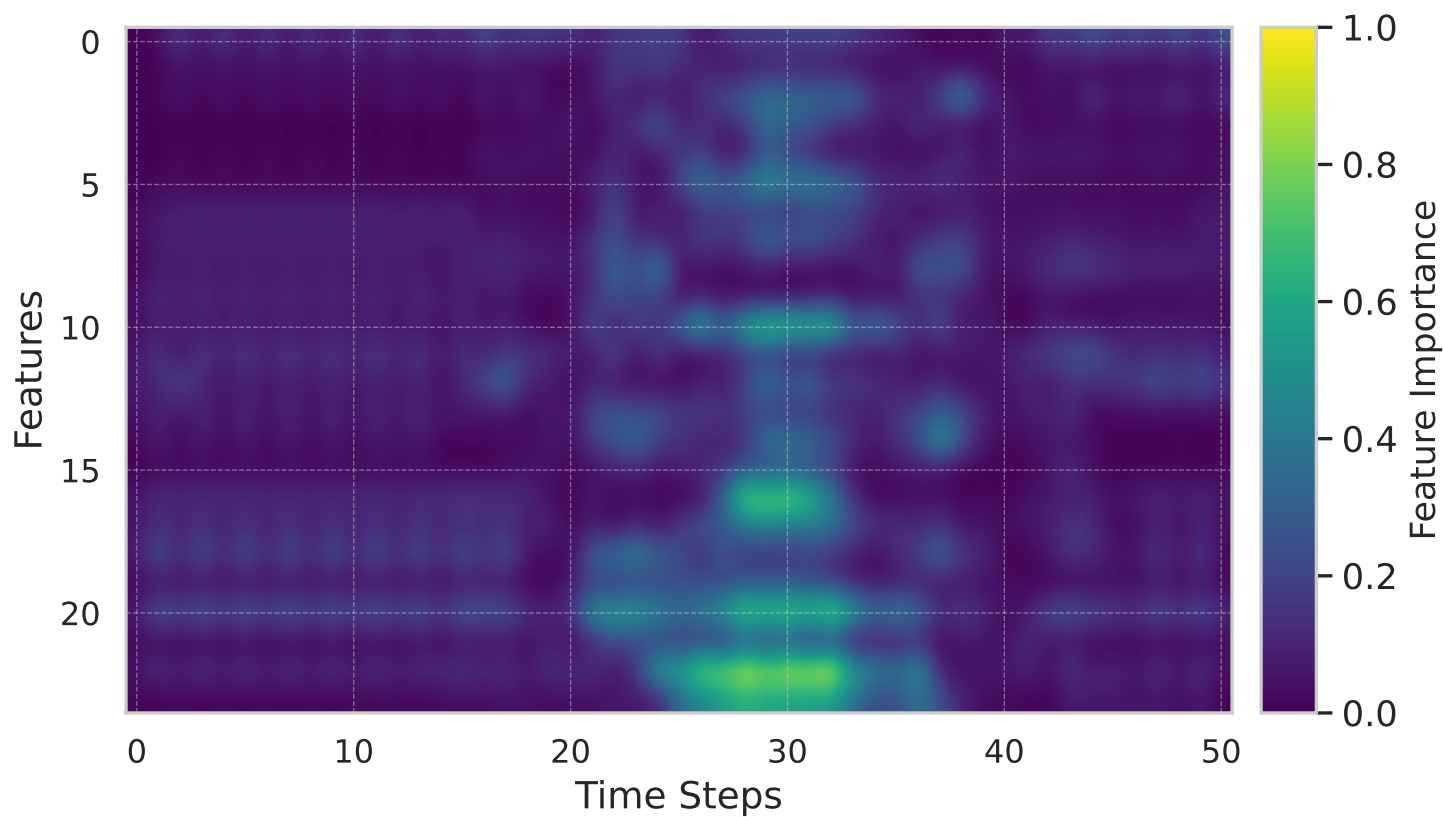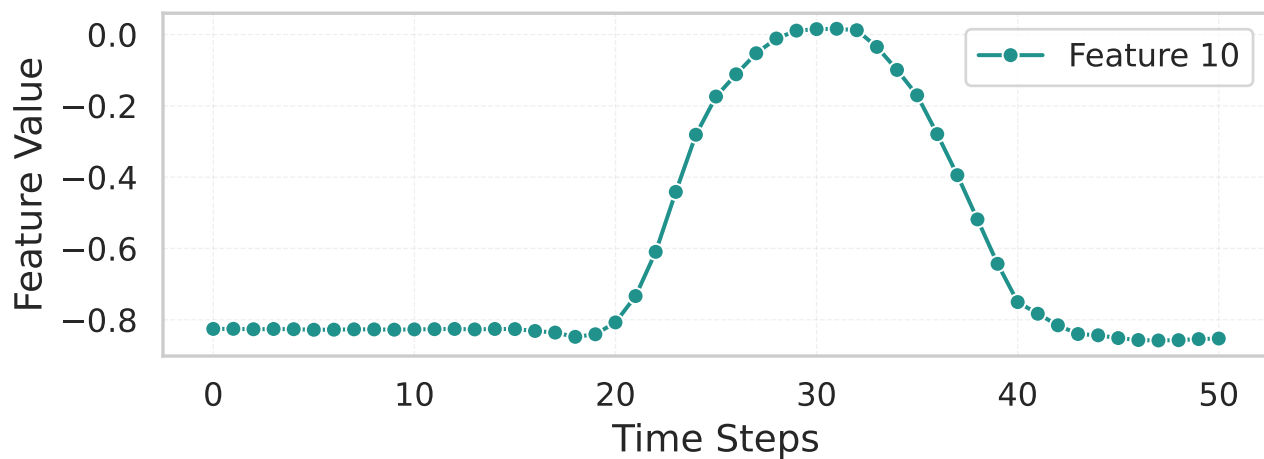



Sample Index: 132

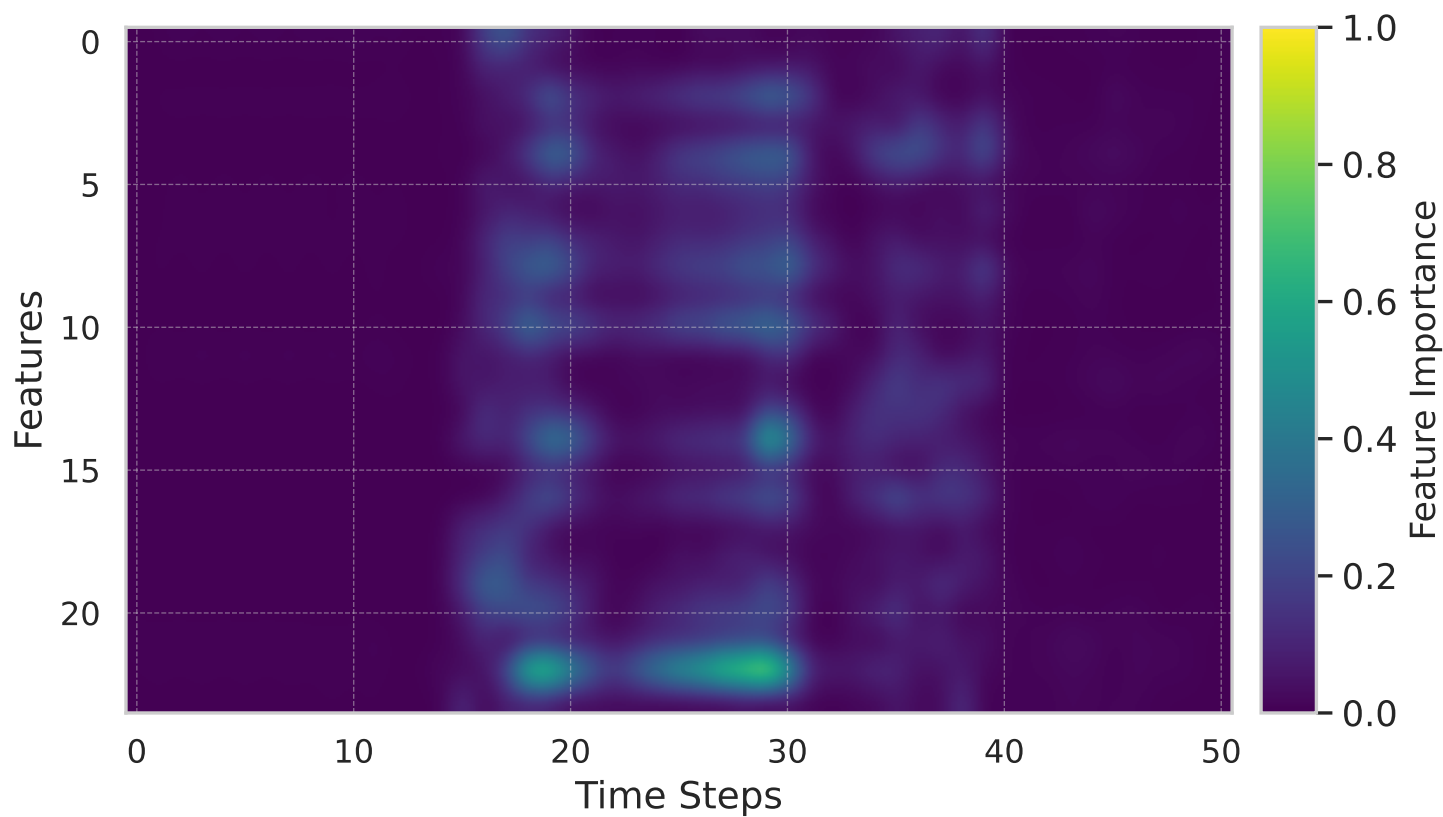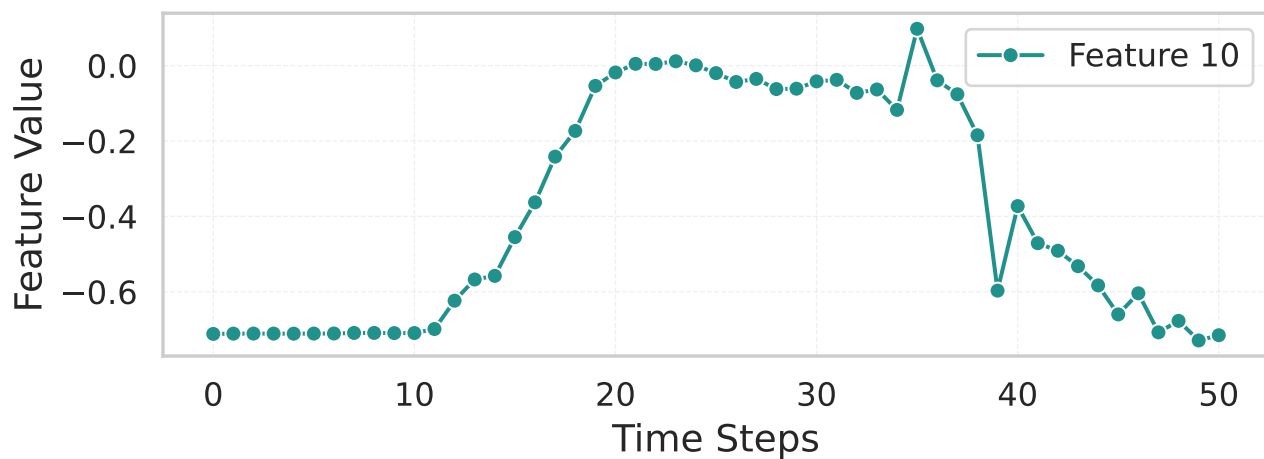

Sample Index: 133

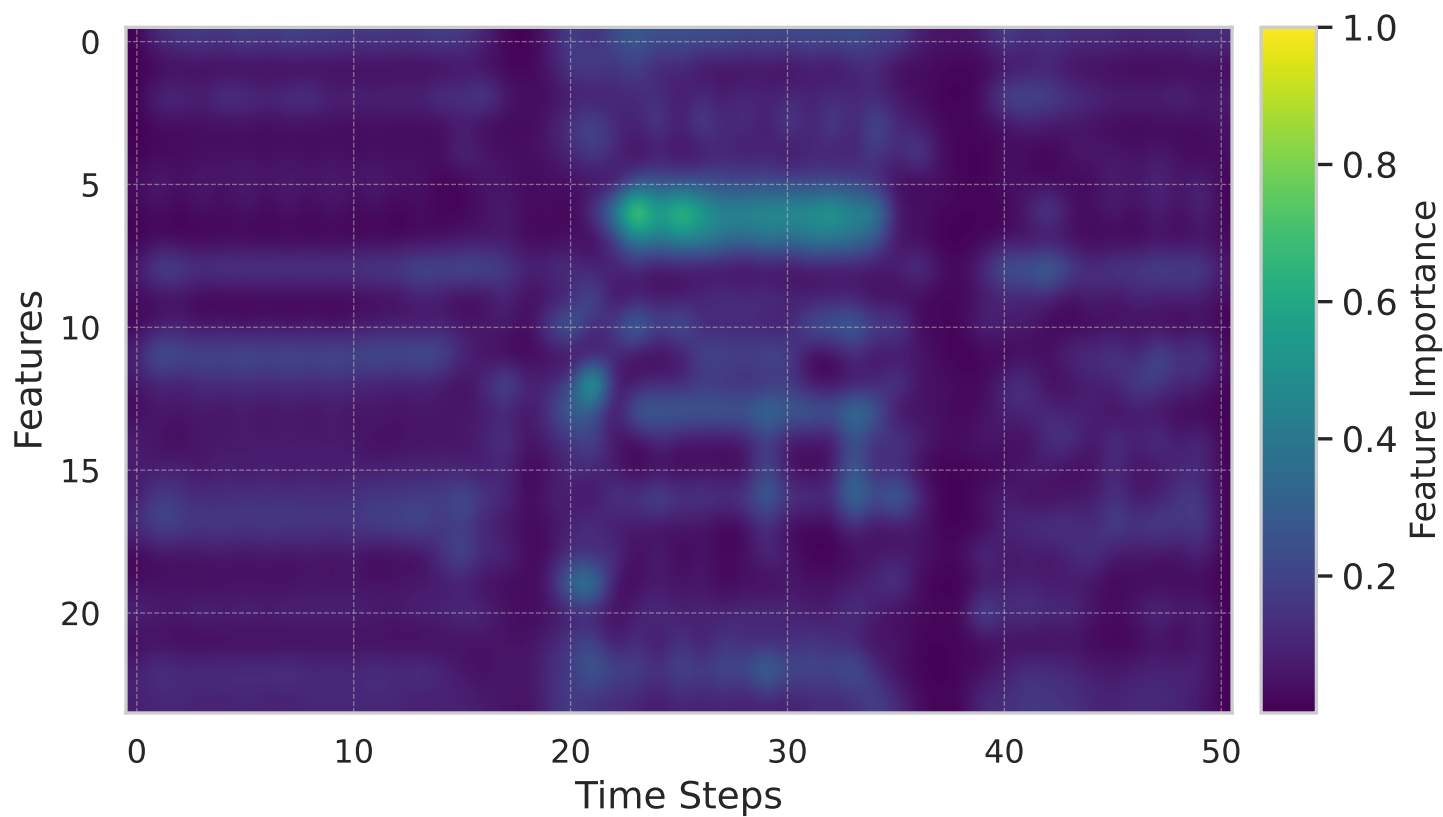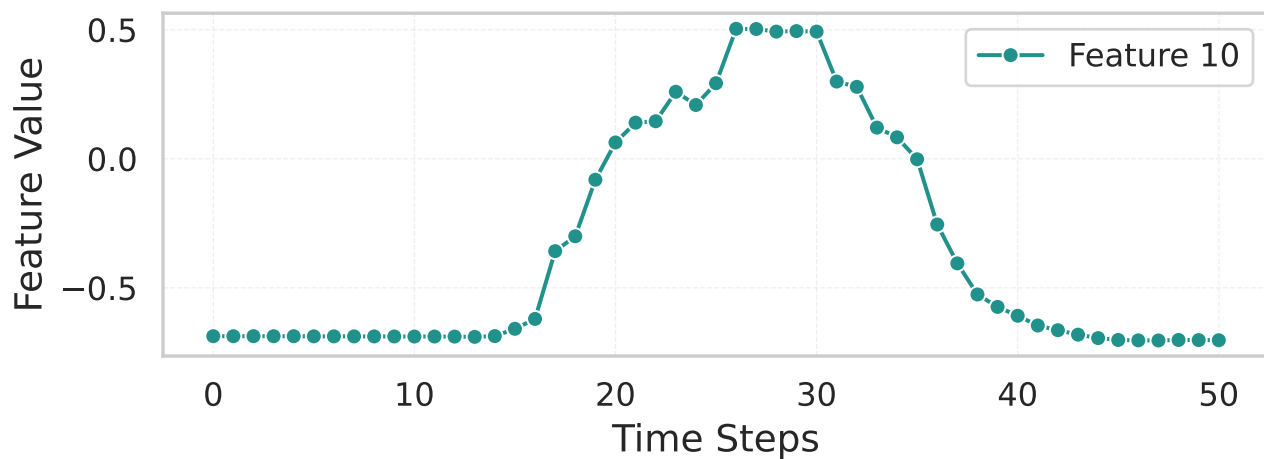

Sample Index: 134

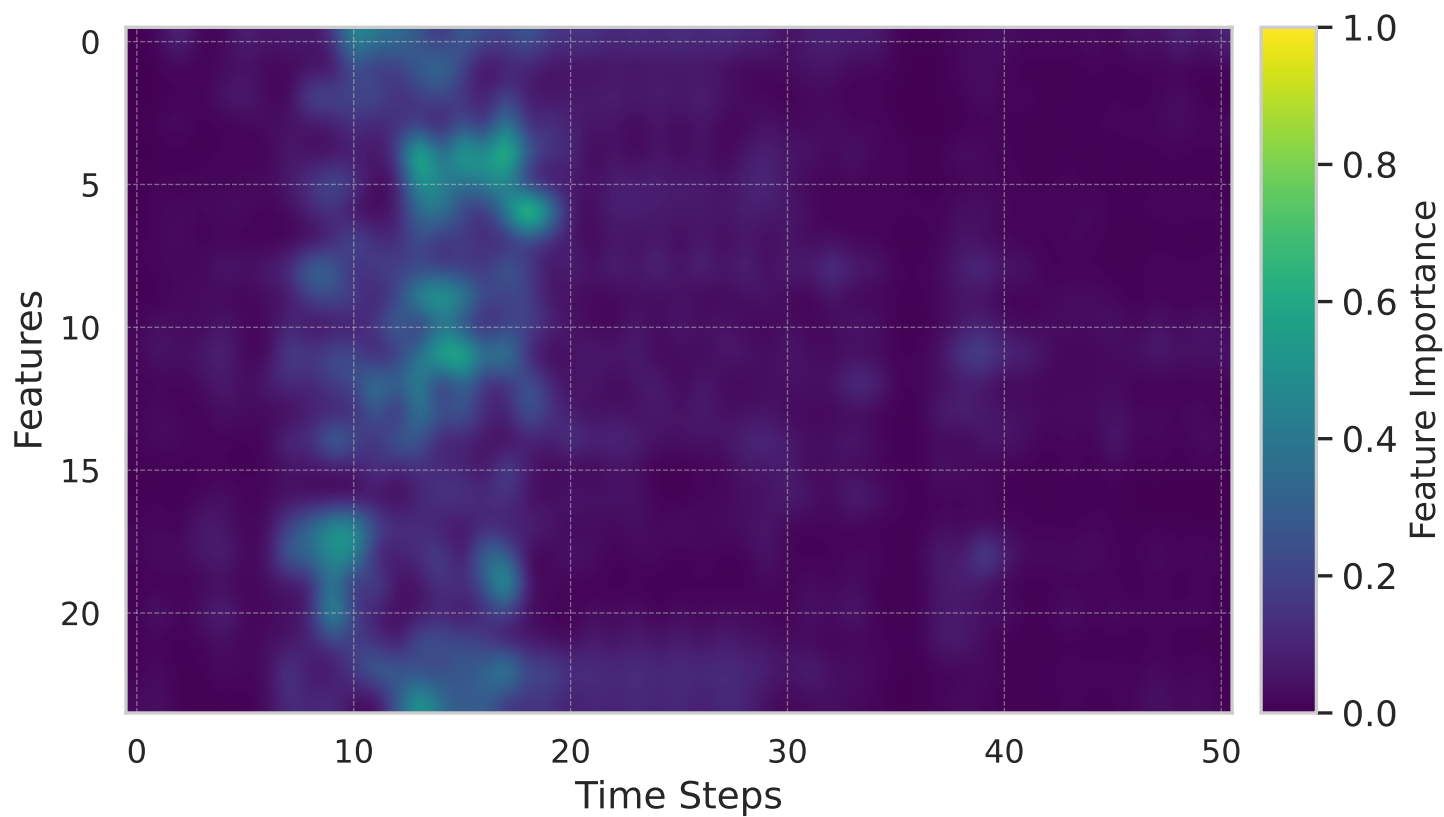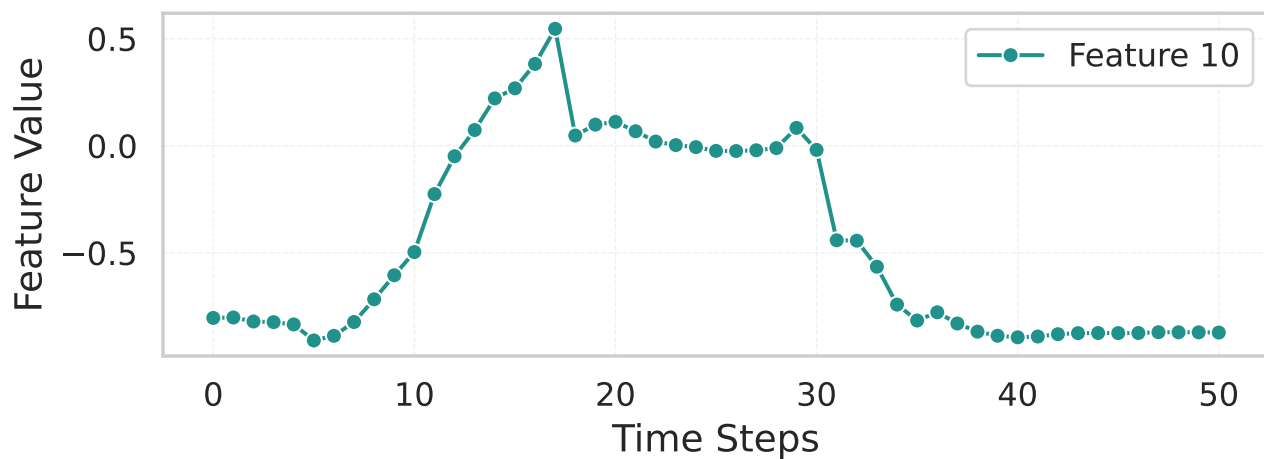

Sample Index: 135

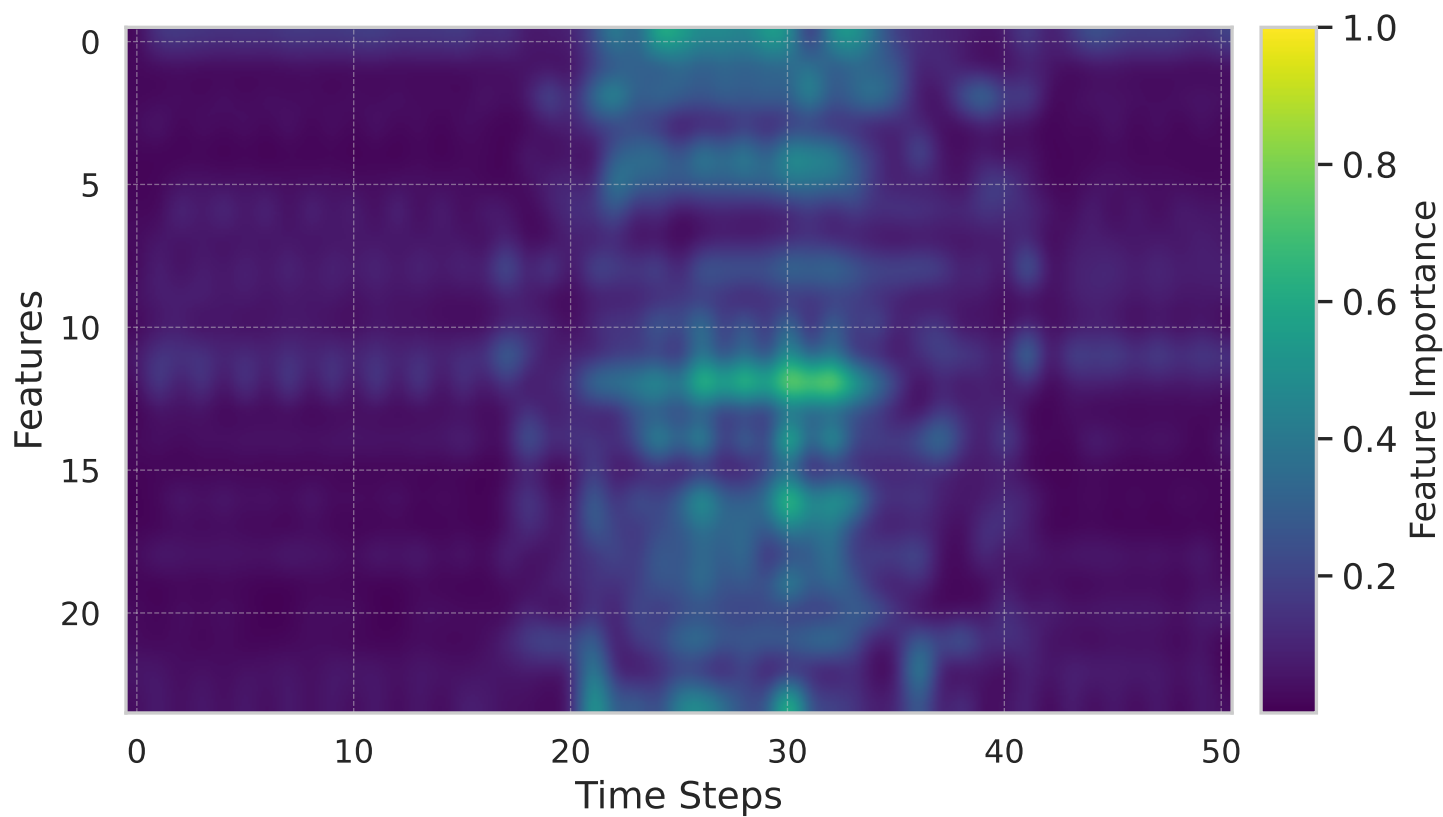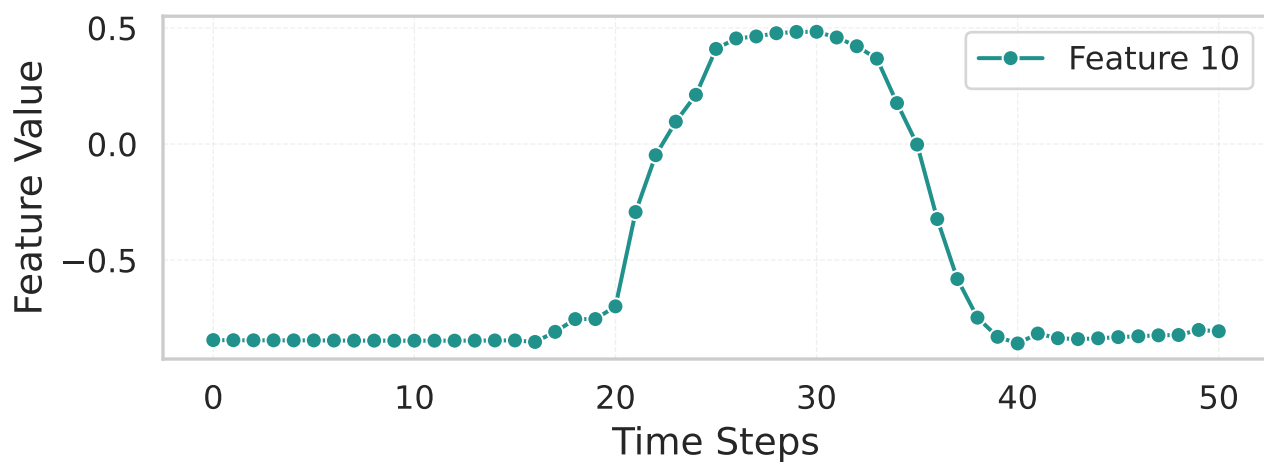

Sample Index: 136

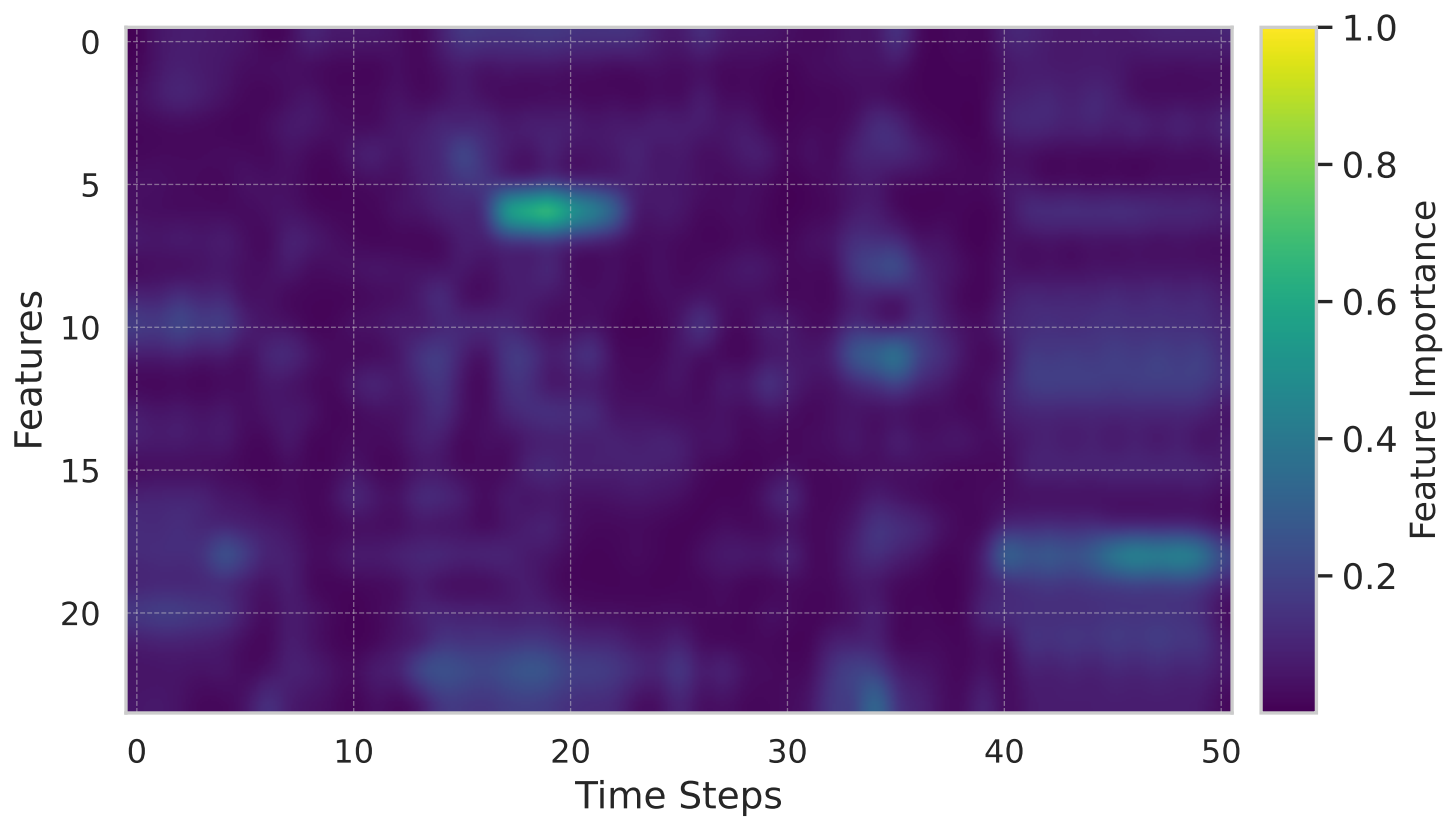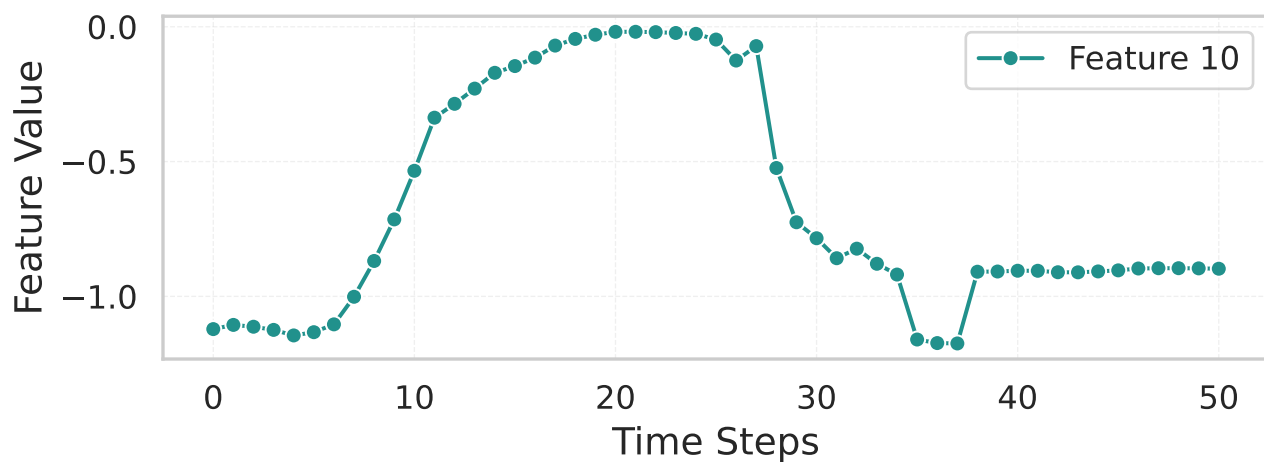

Sample Index: 137

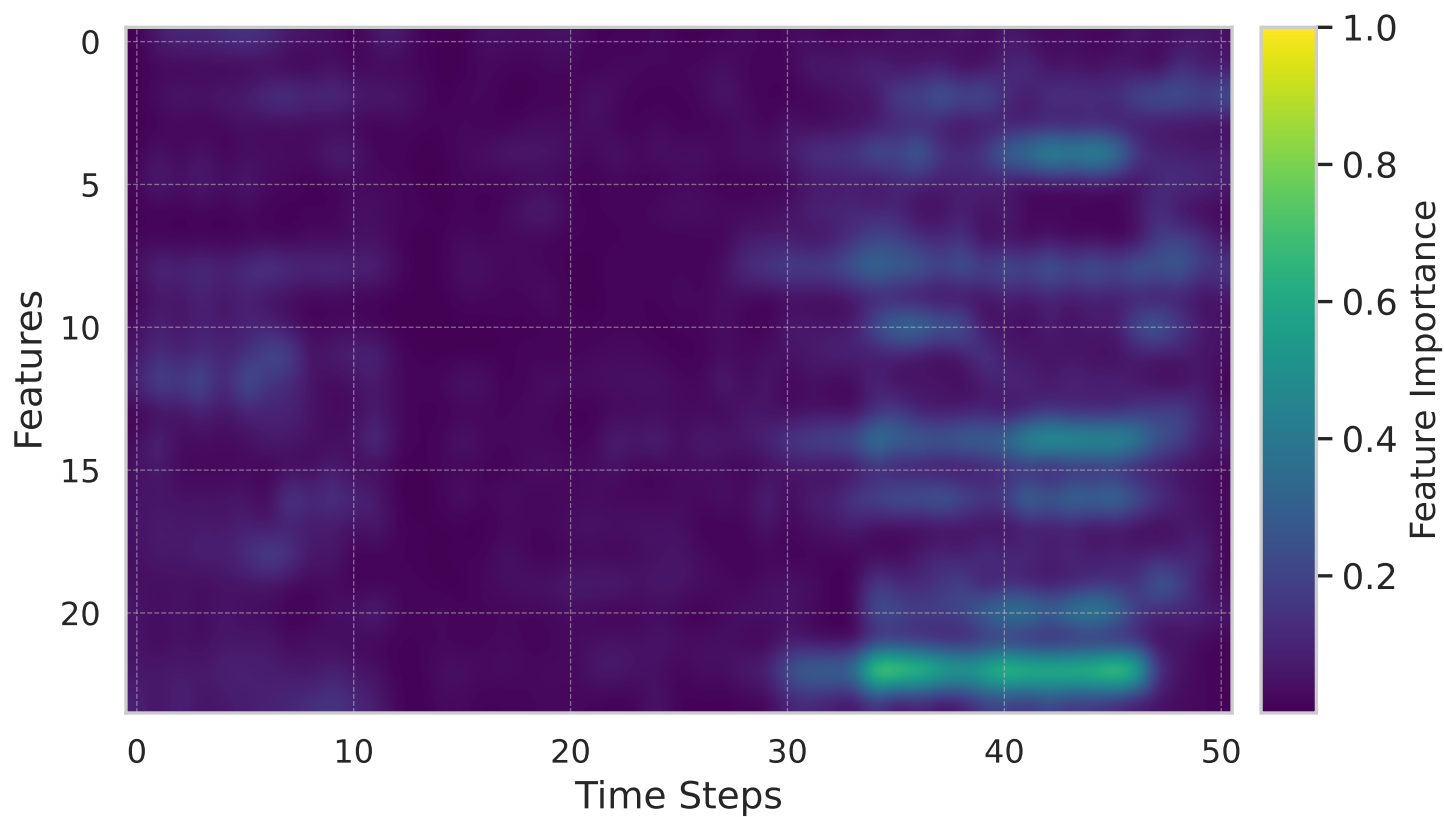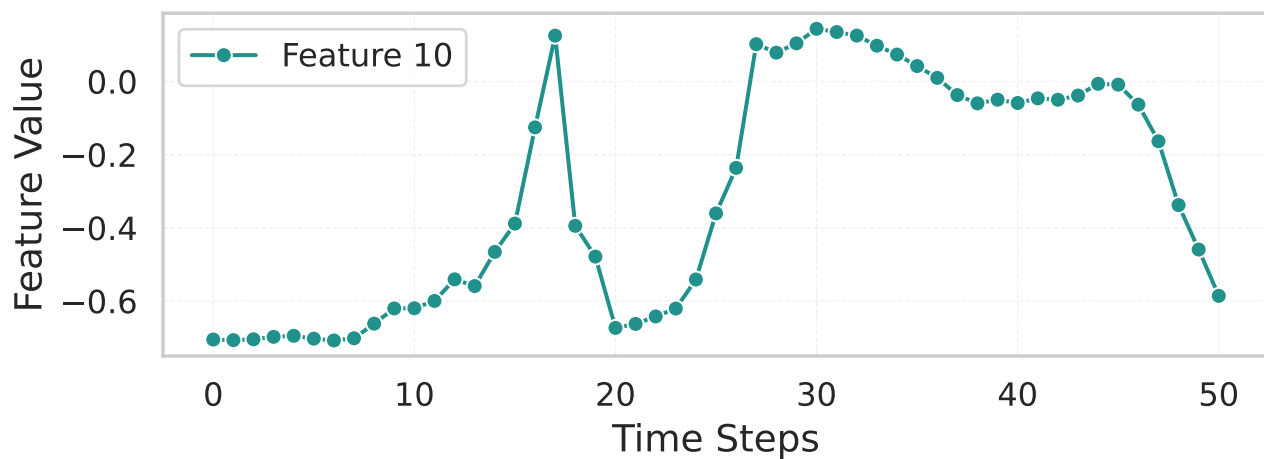

Sample Index: 138

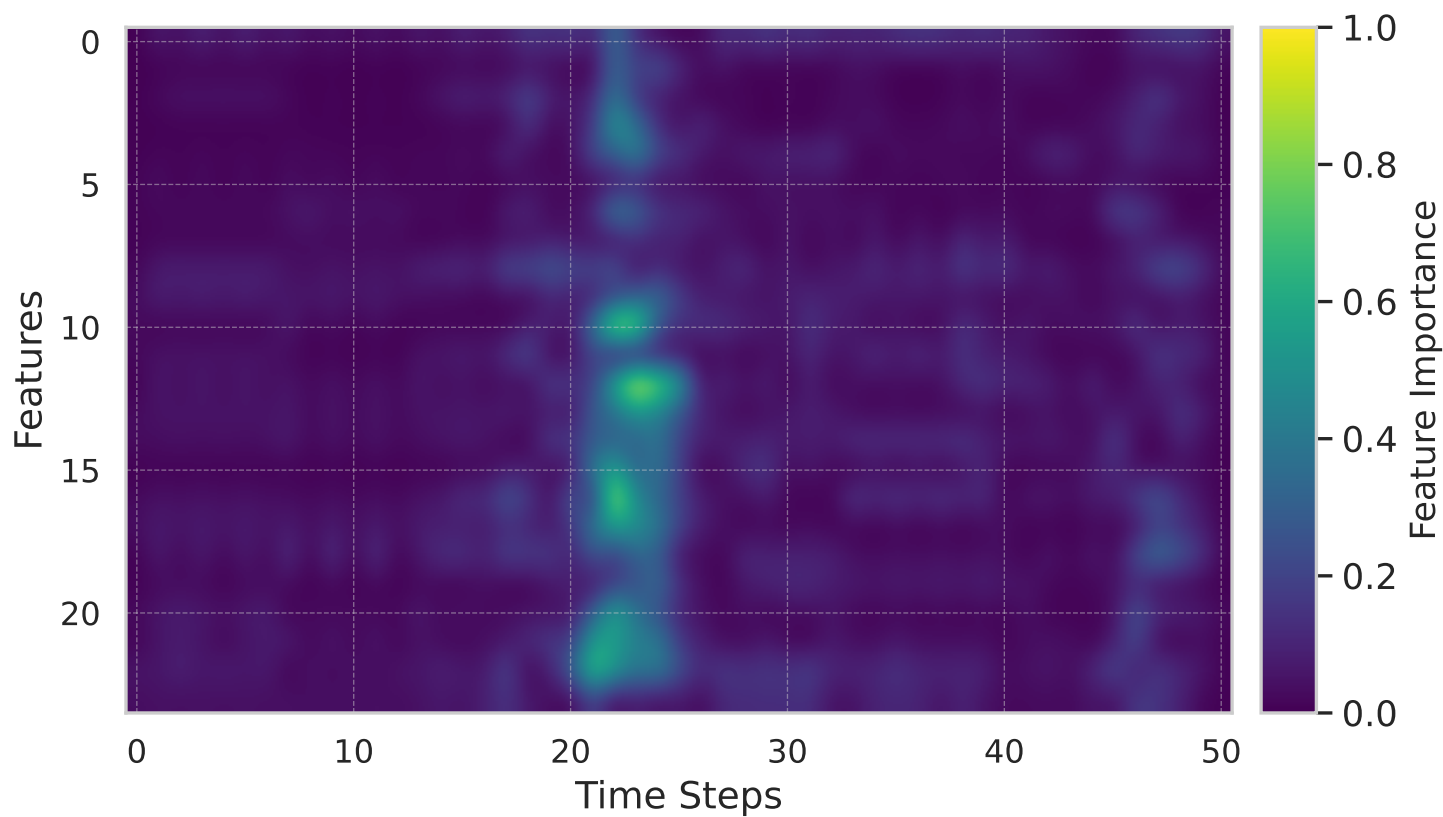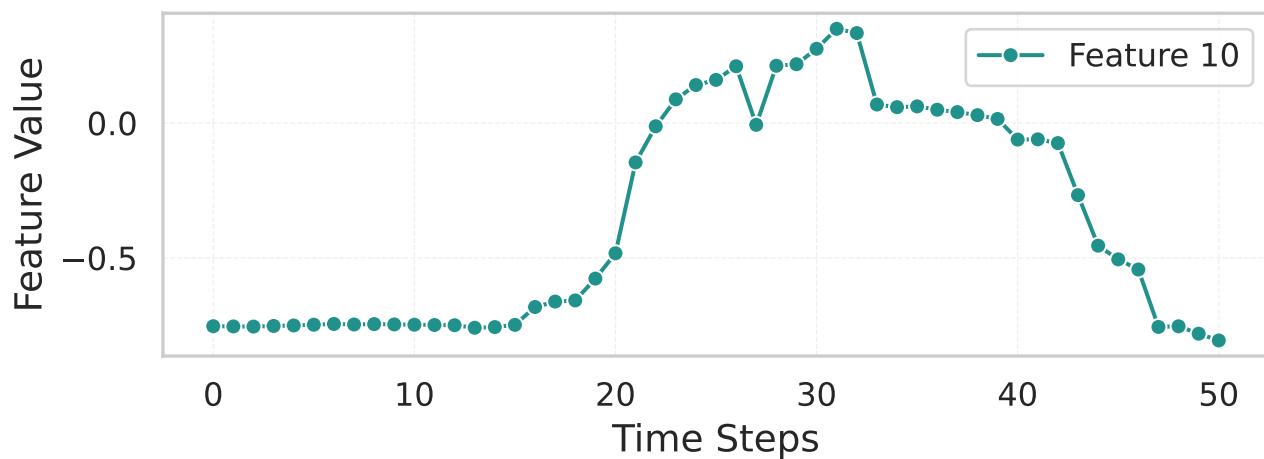

Sample Index: 139

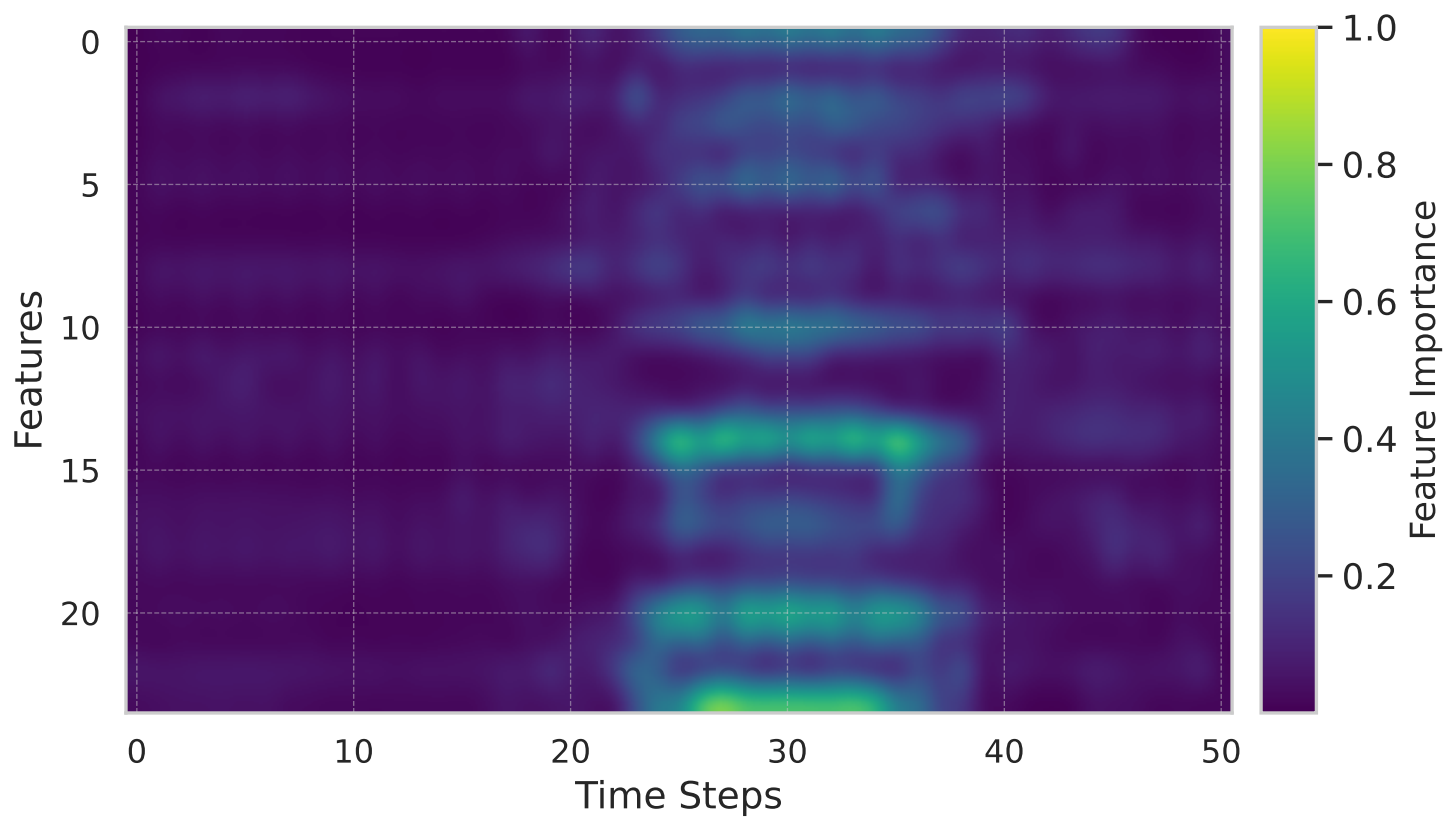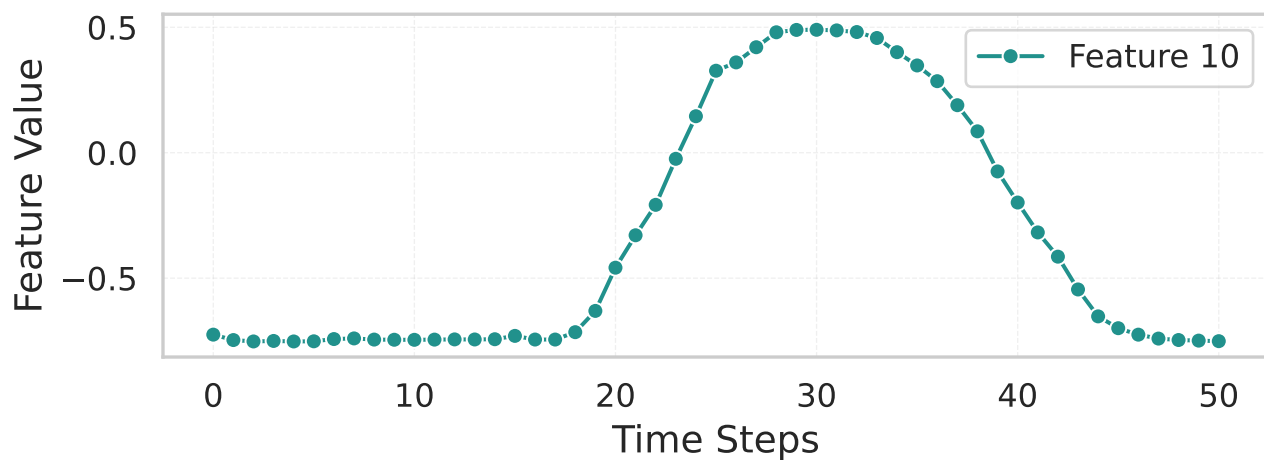



Sample Index: 140

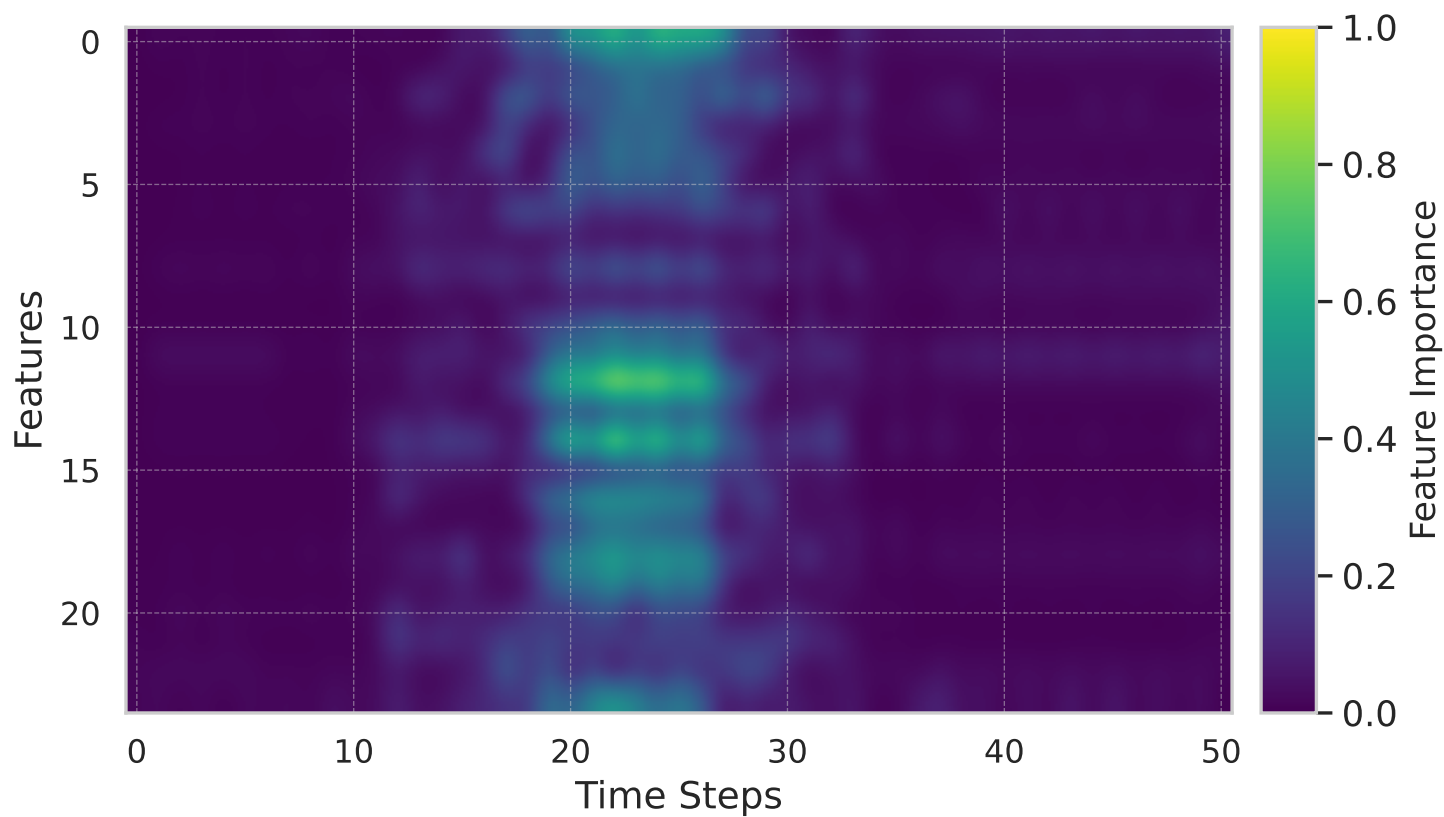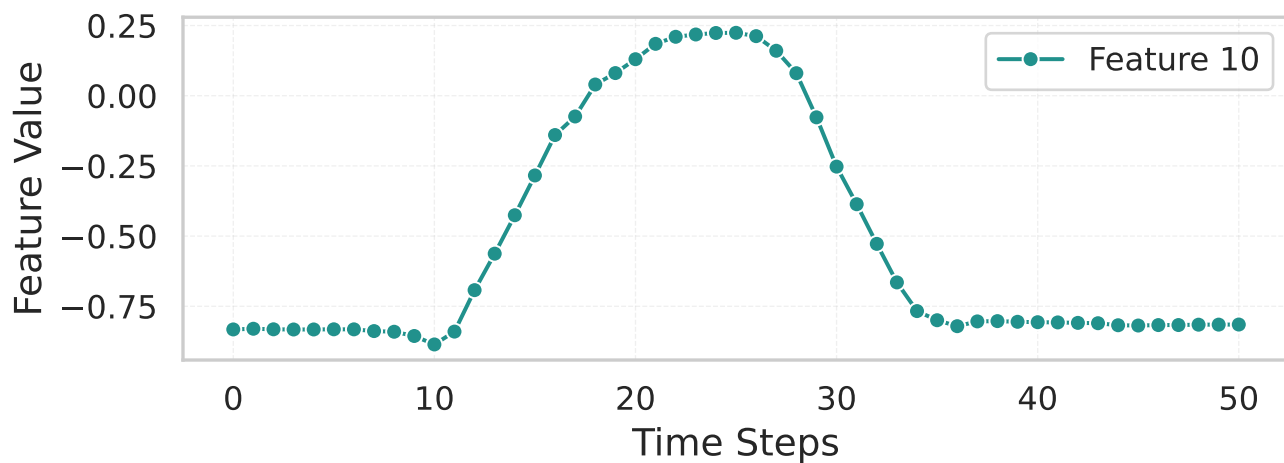

Sample Index: 141

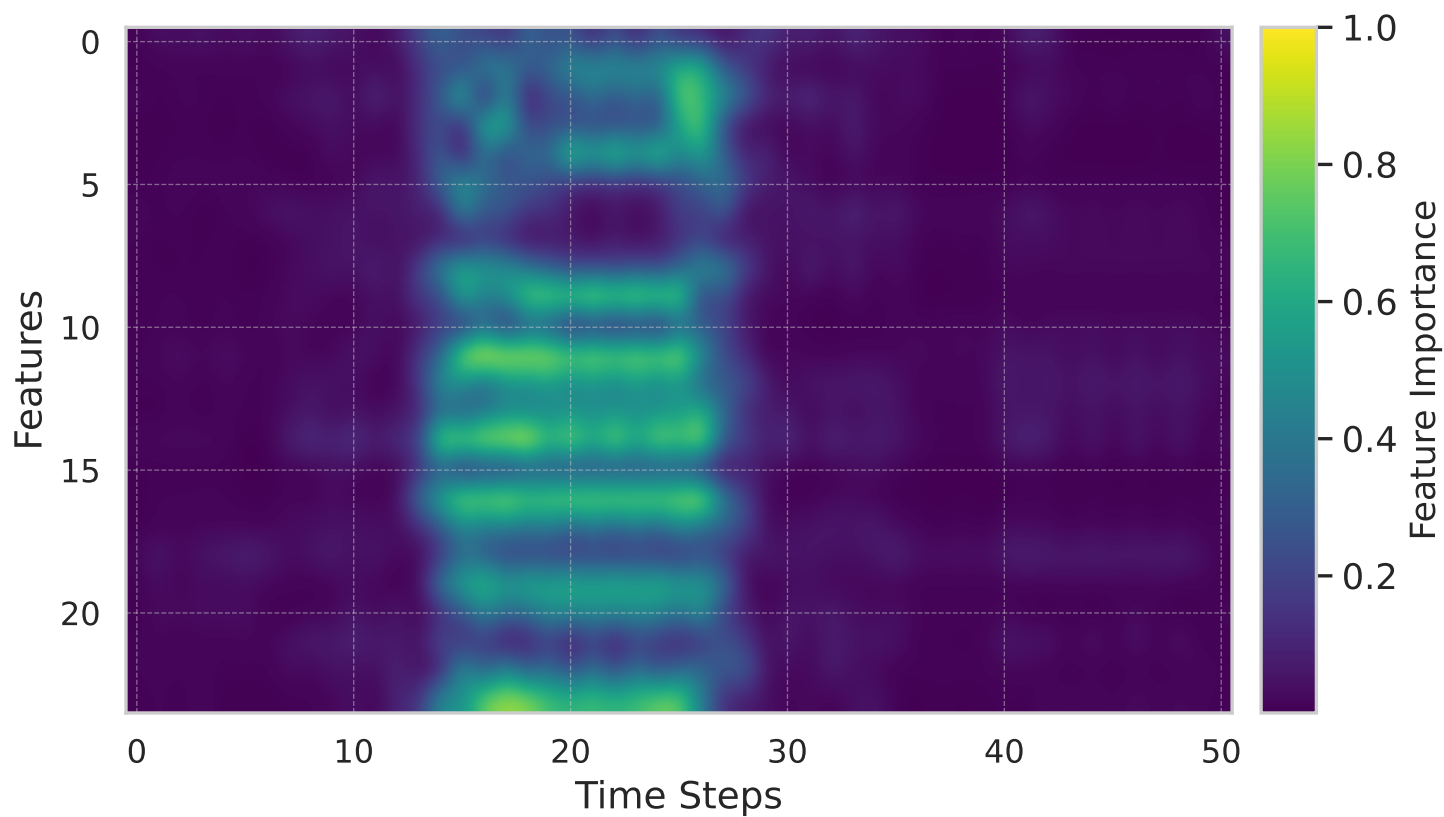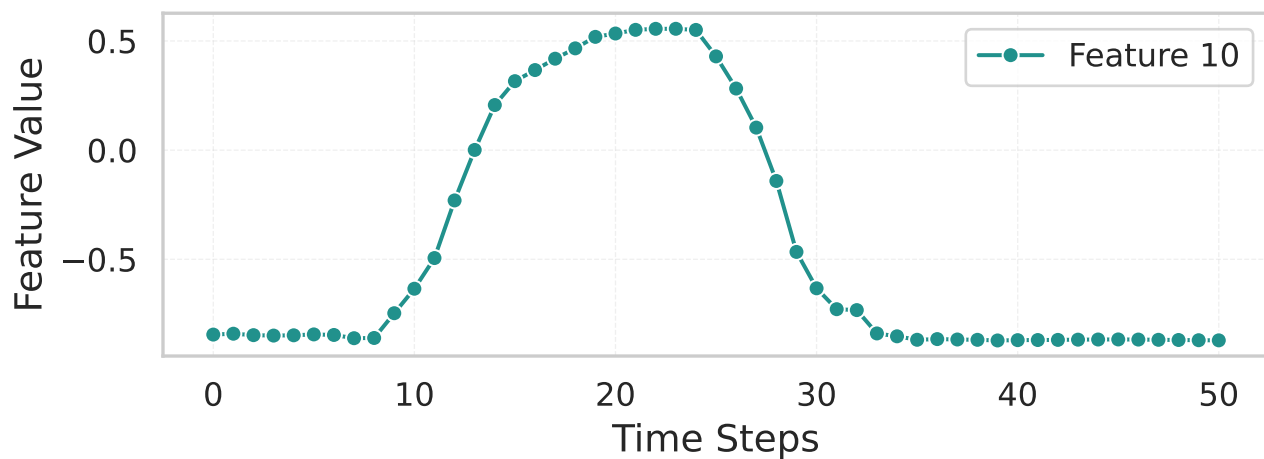

Sample Index: 142

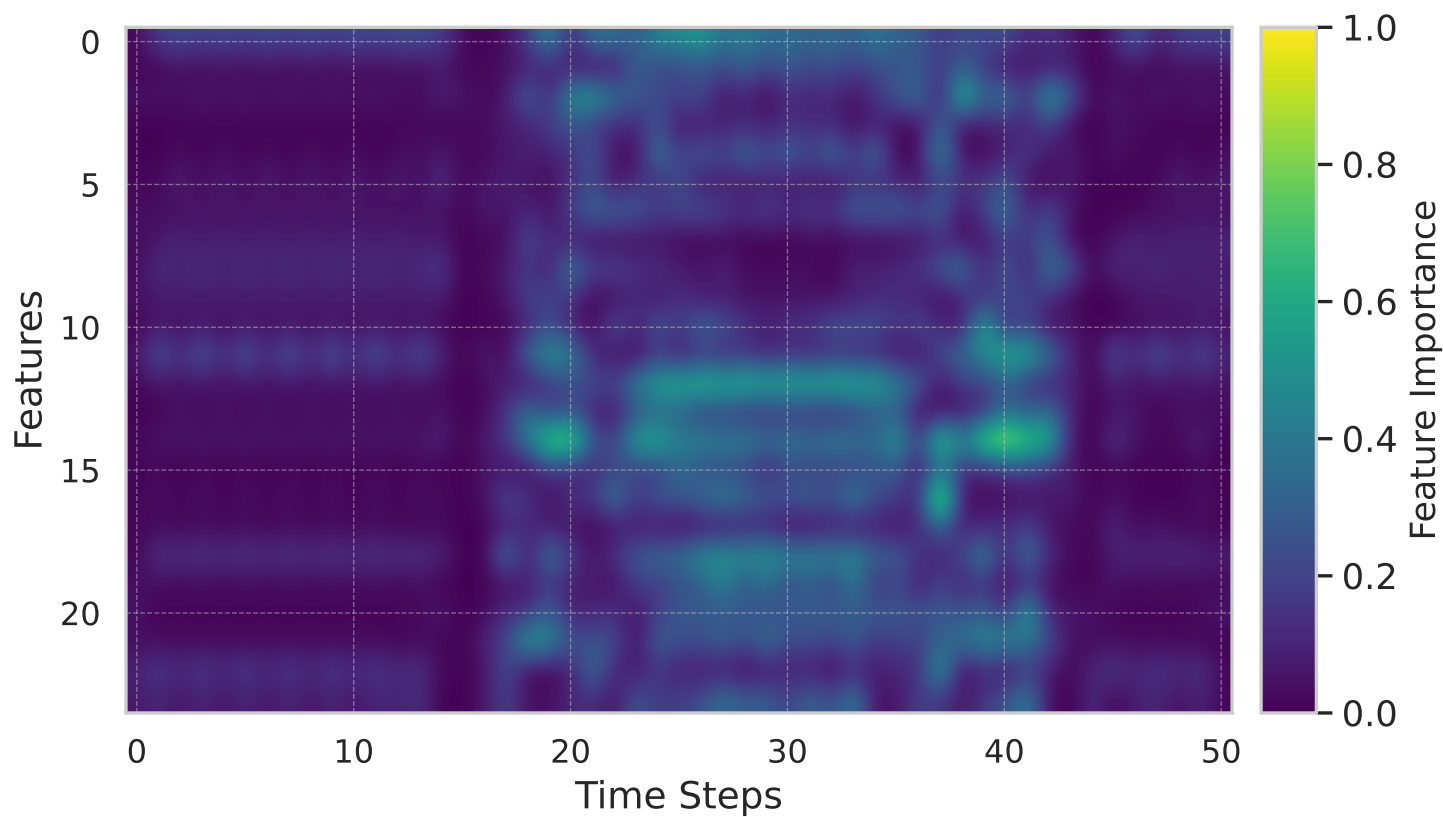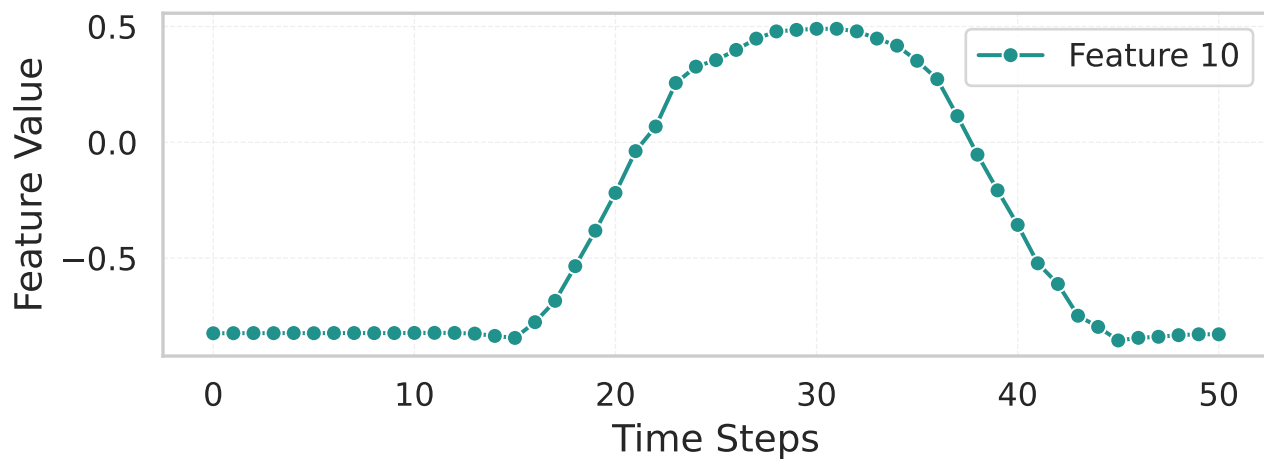

Sample Index: 143

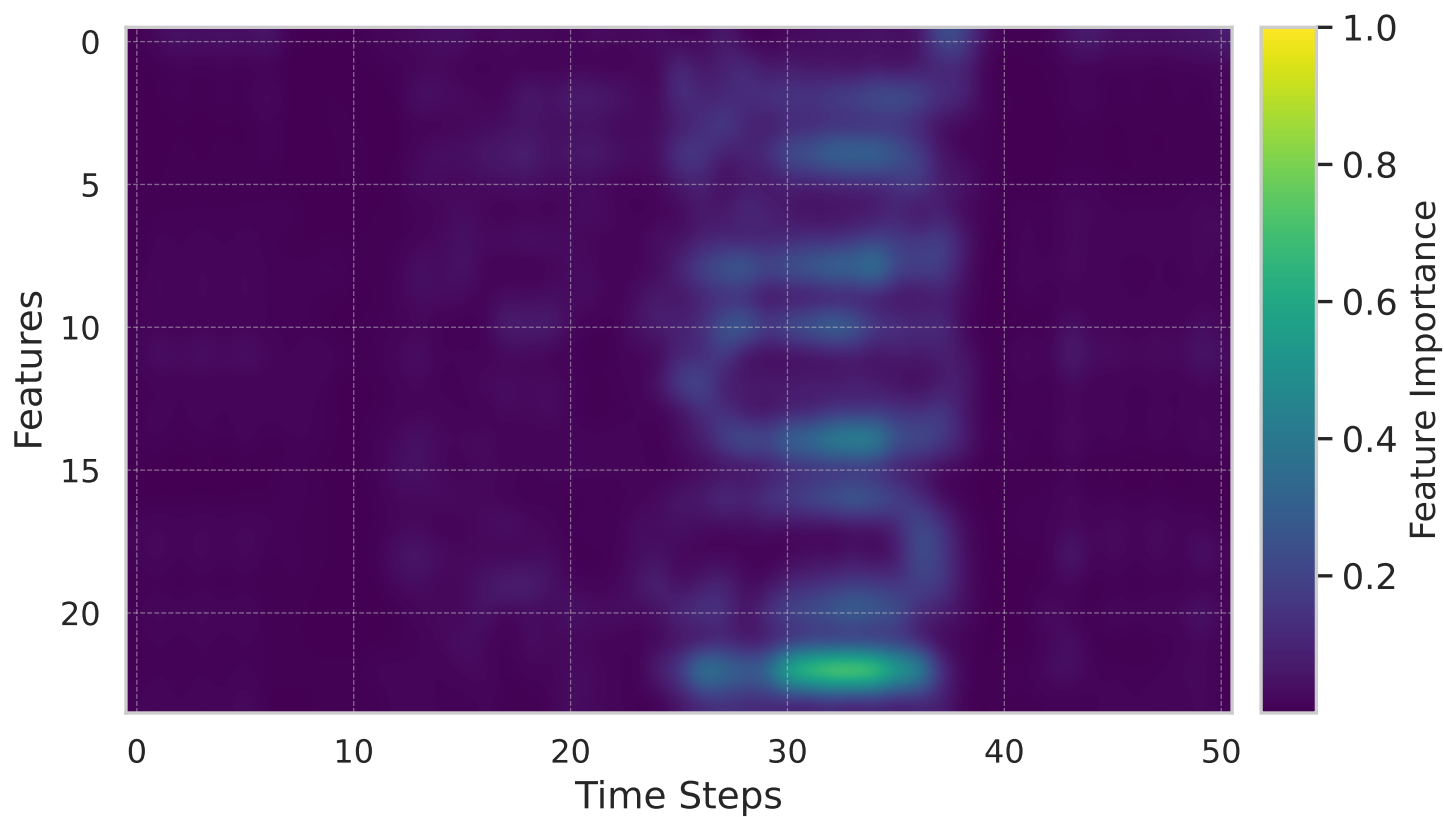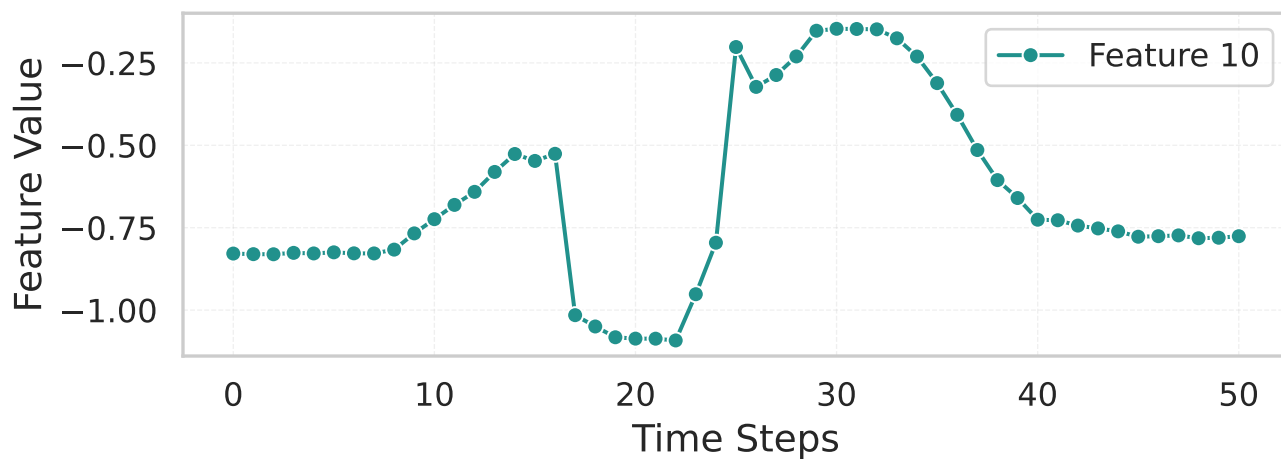

Sample Index: 144

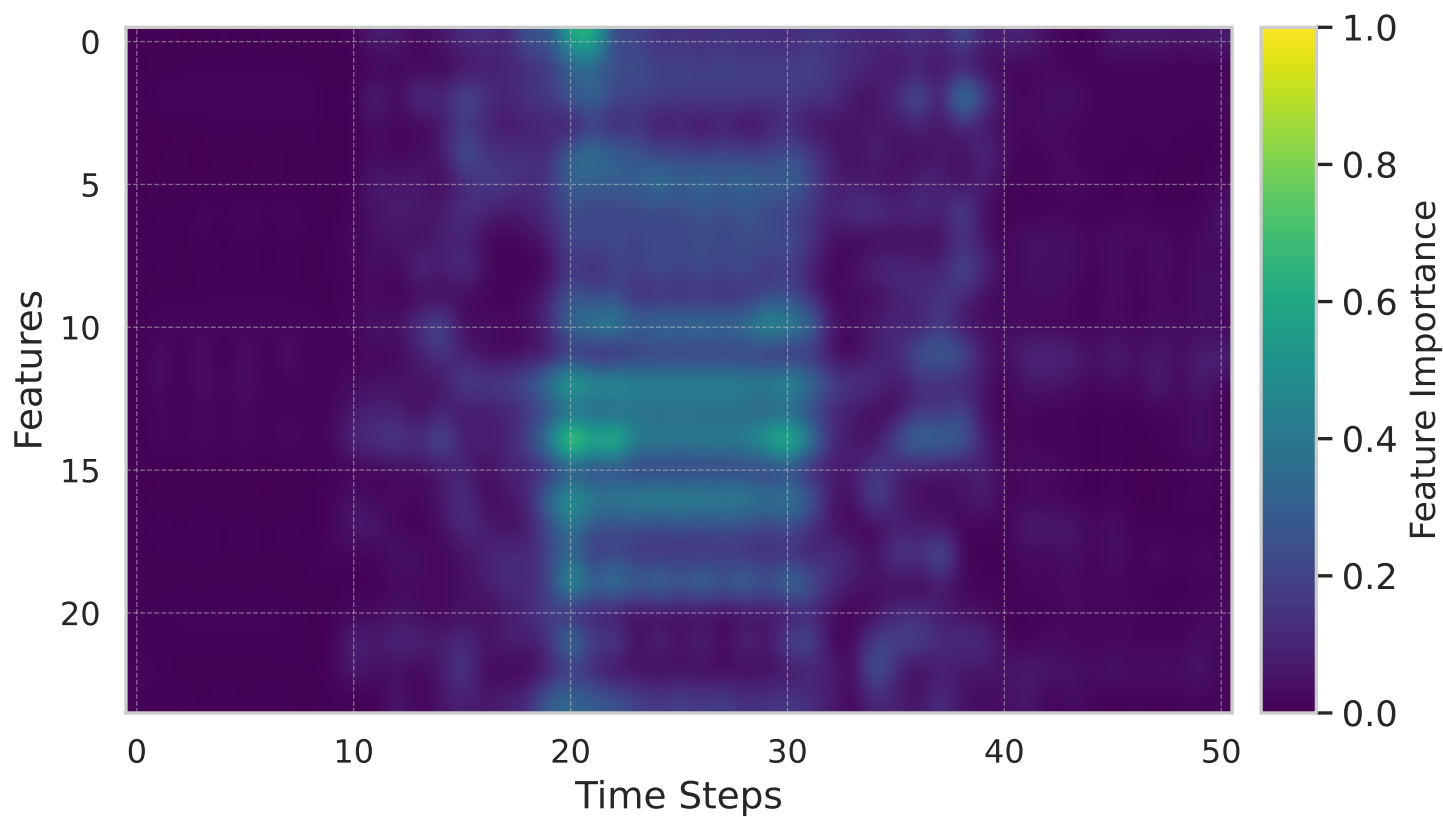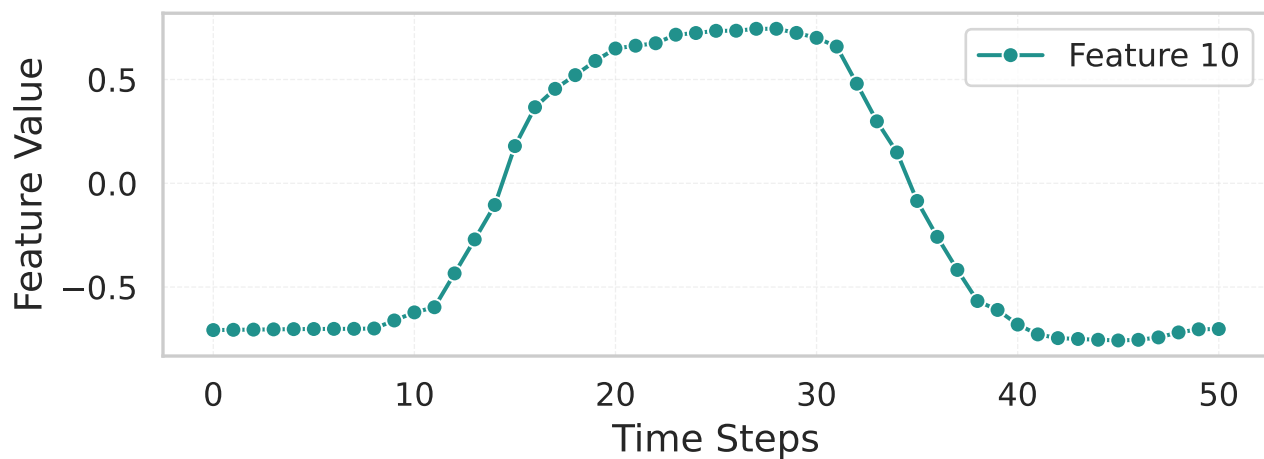

Sample Index: 145

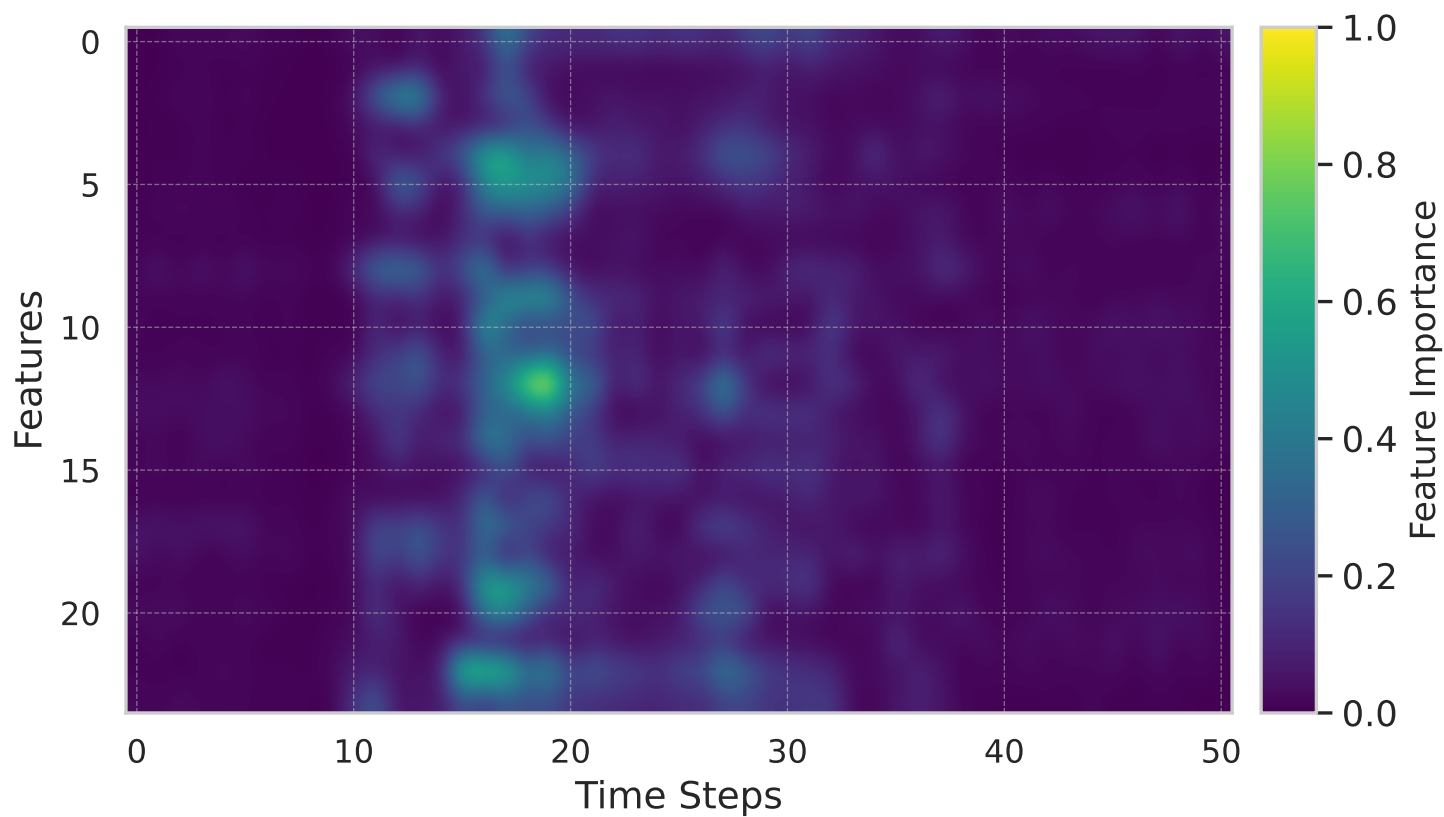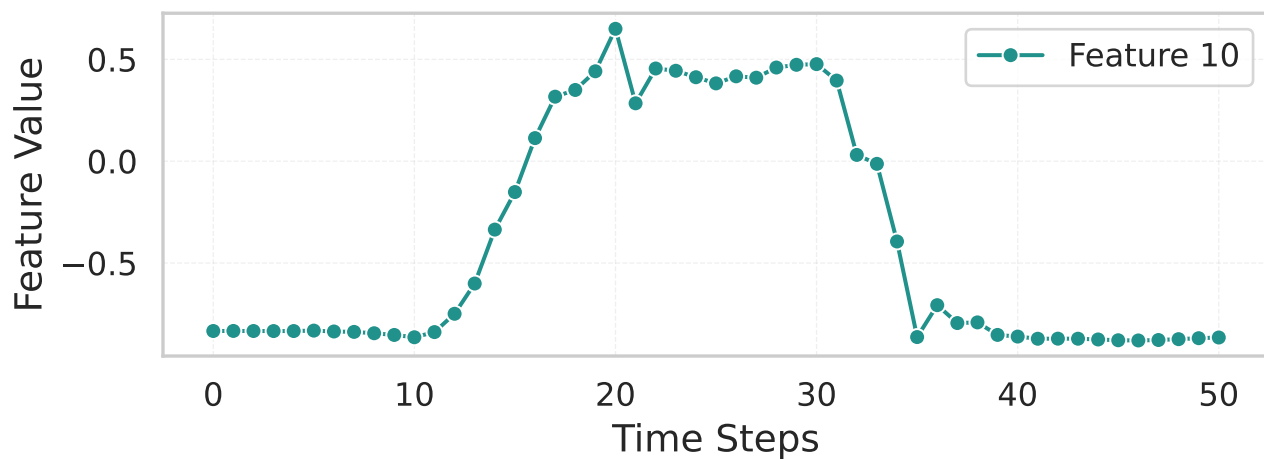

Sample Index: 146

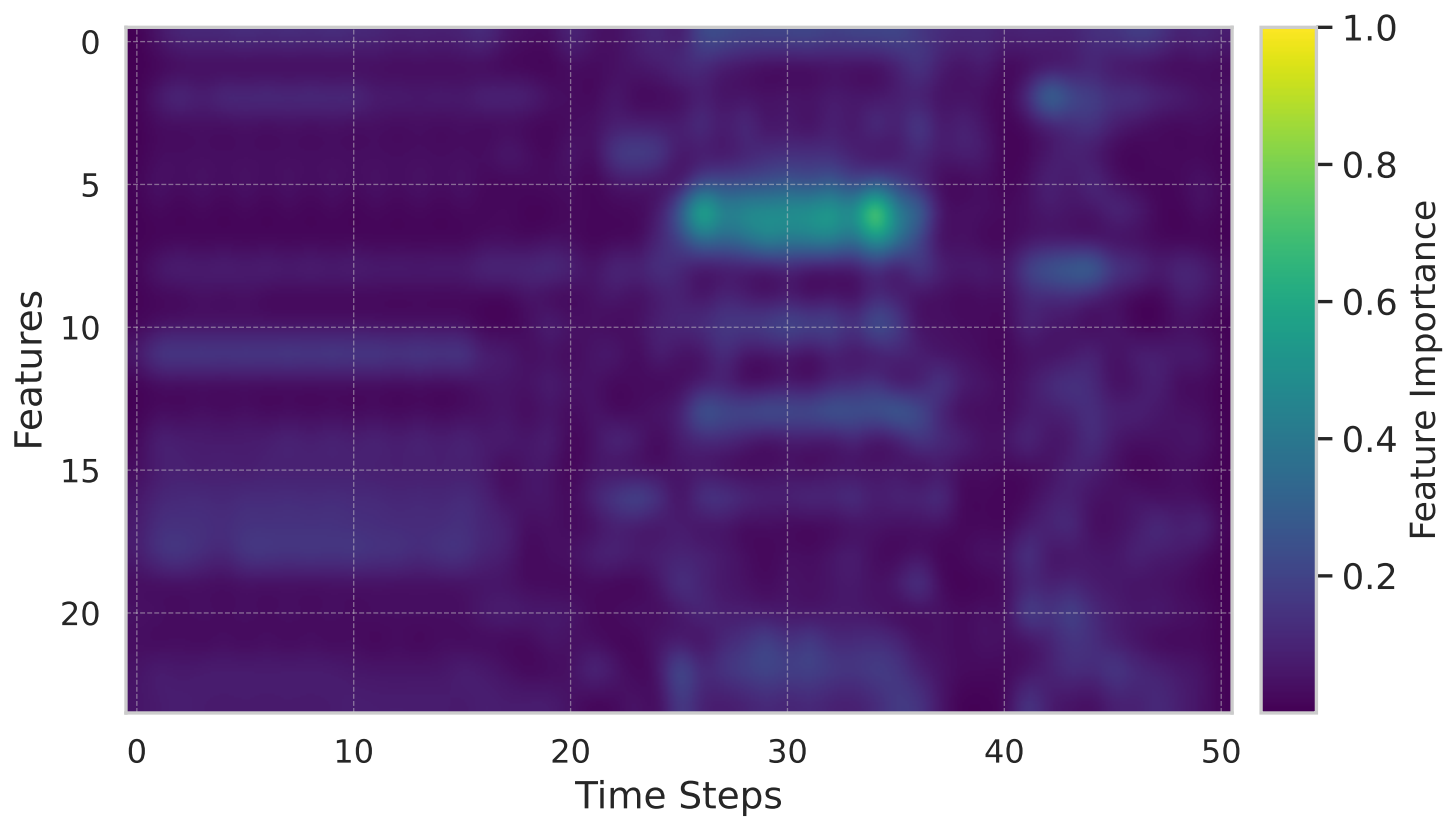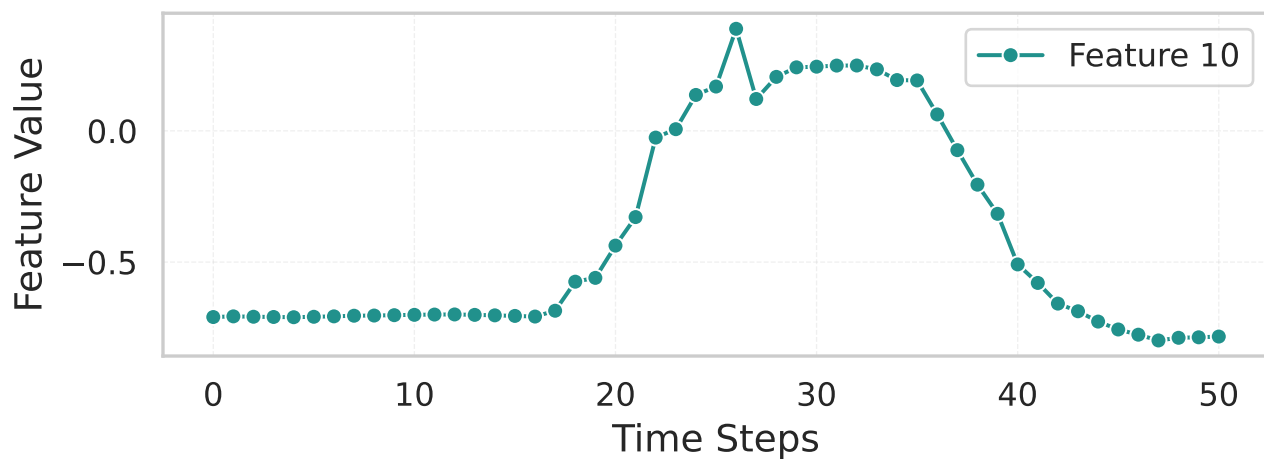

Sample Index: 147

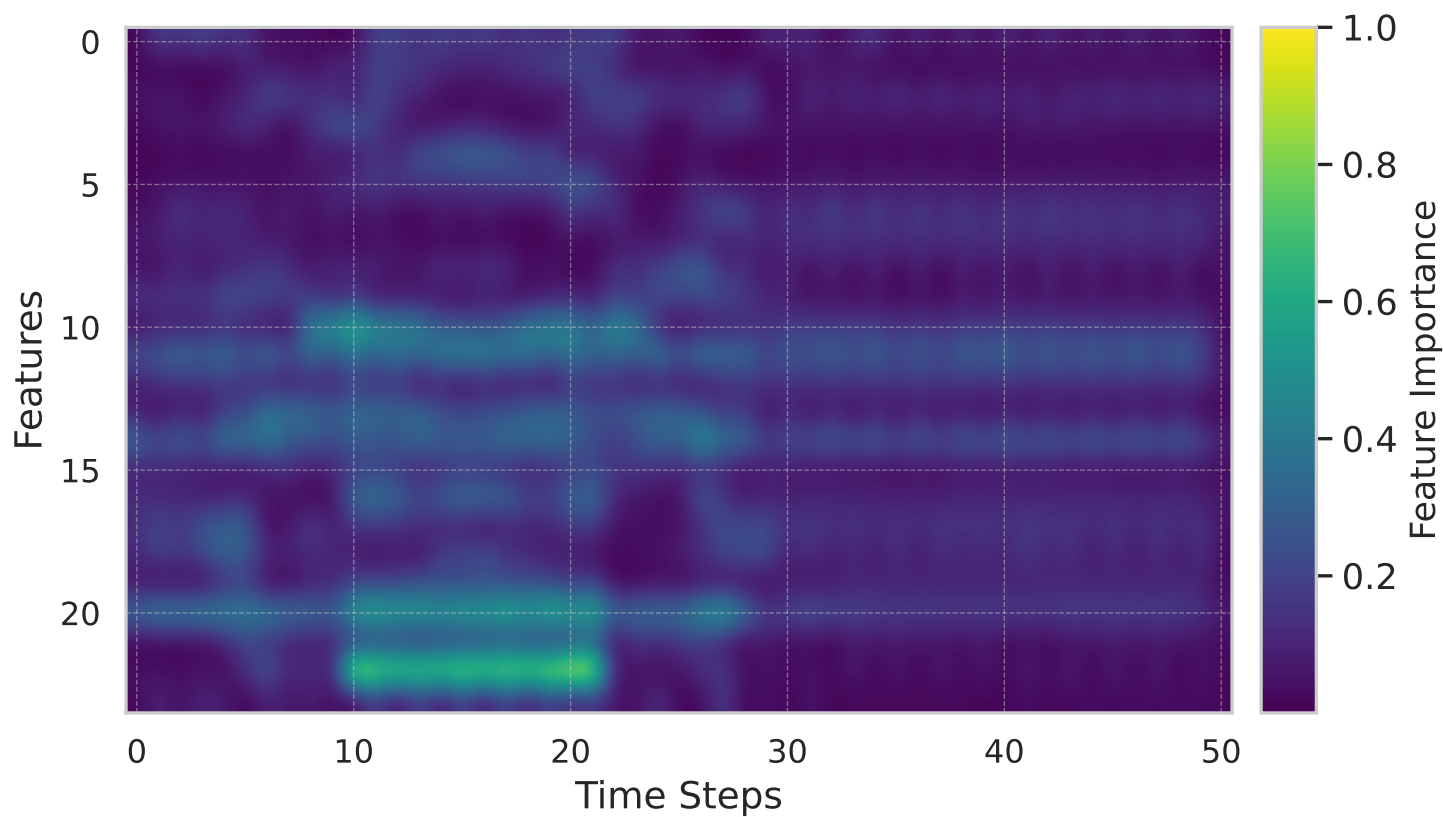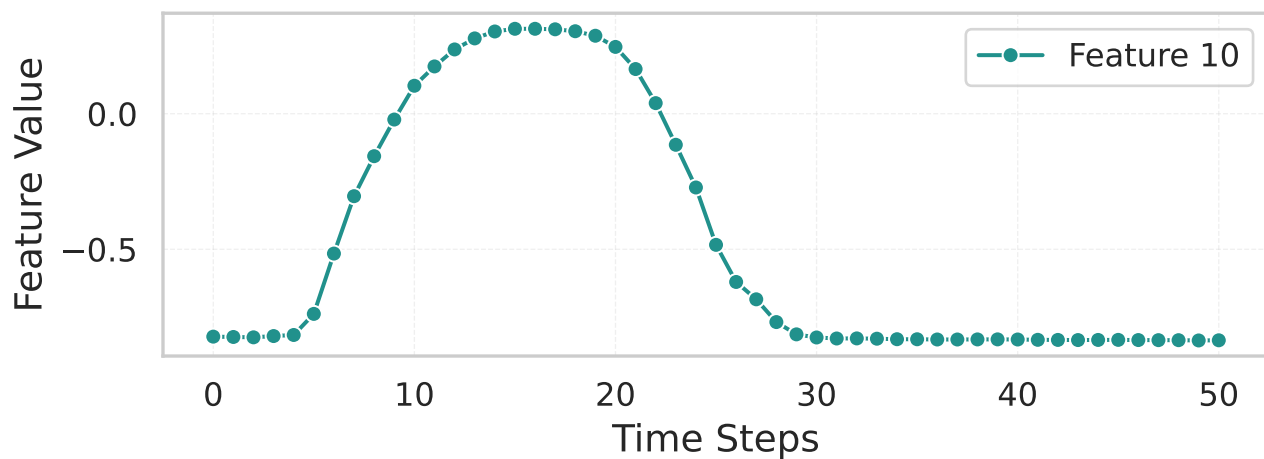



Sample Index: 148

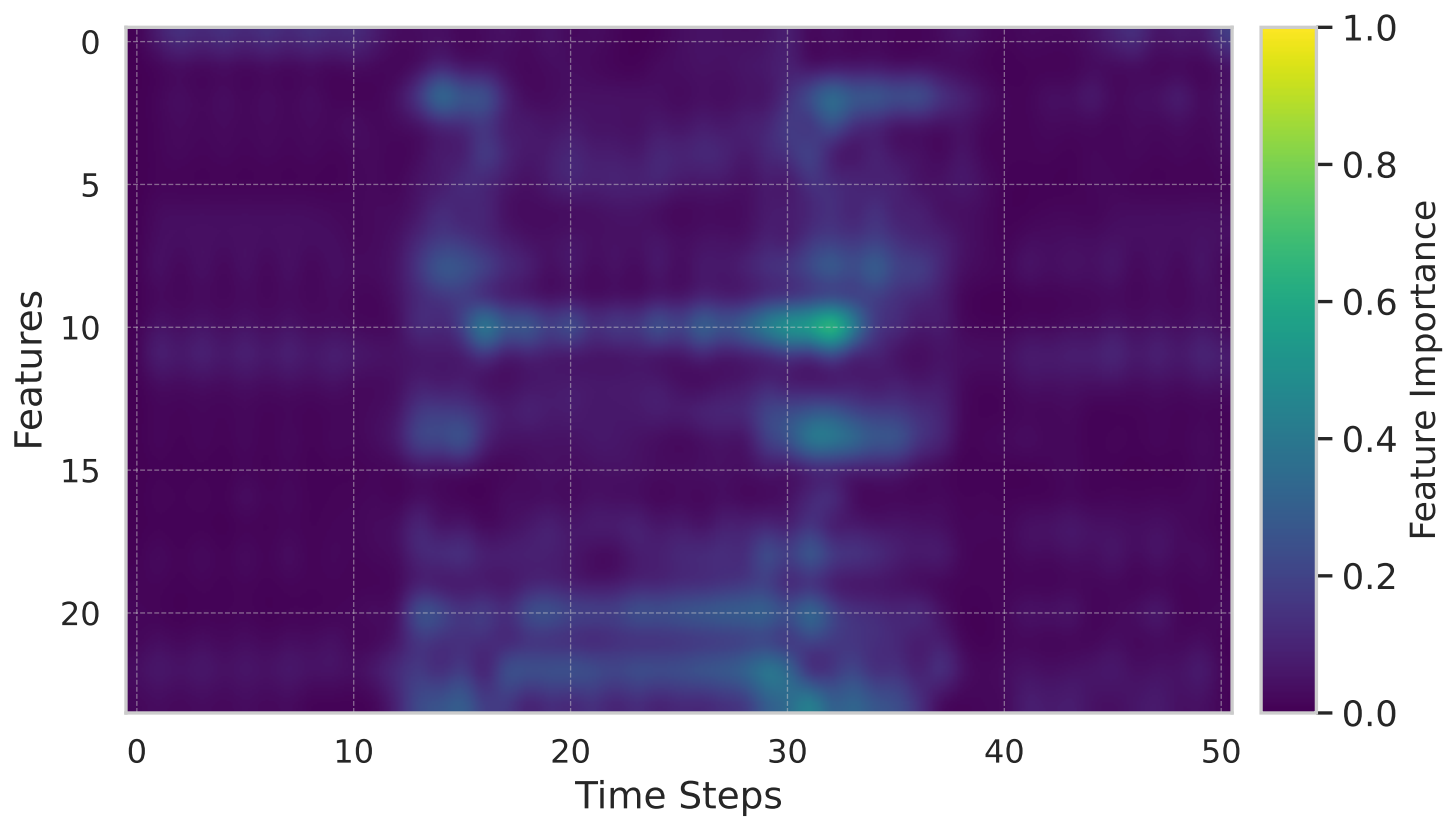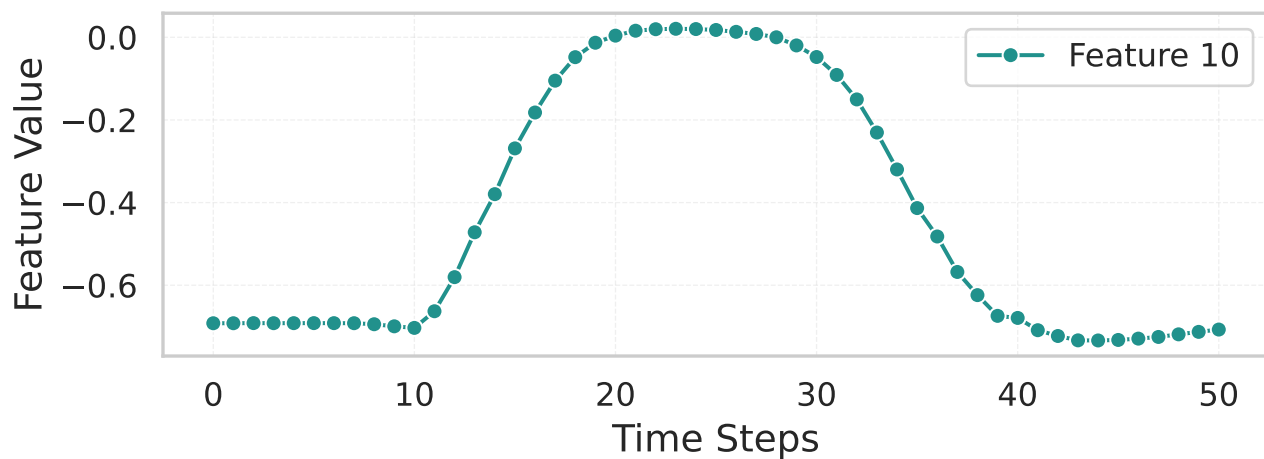

Sample Index: 149

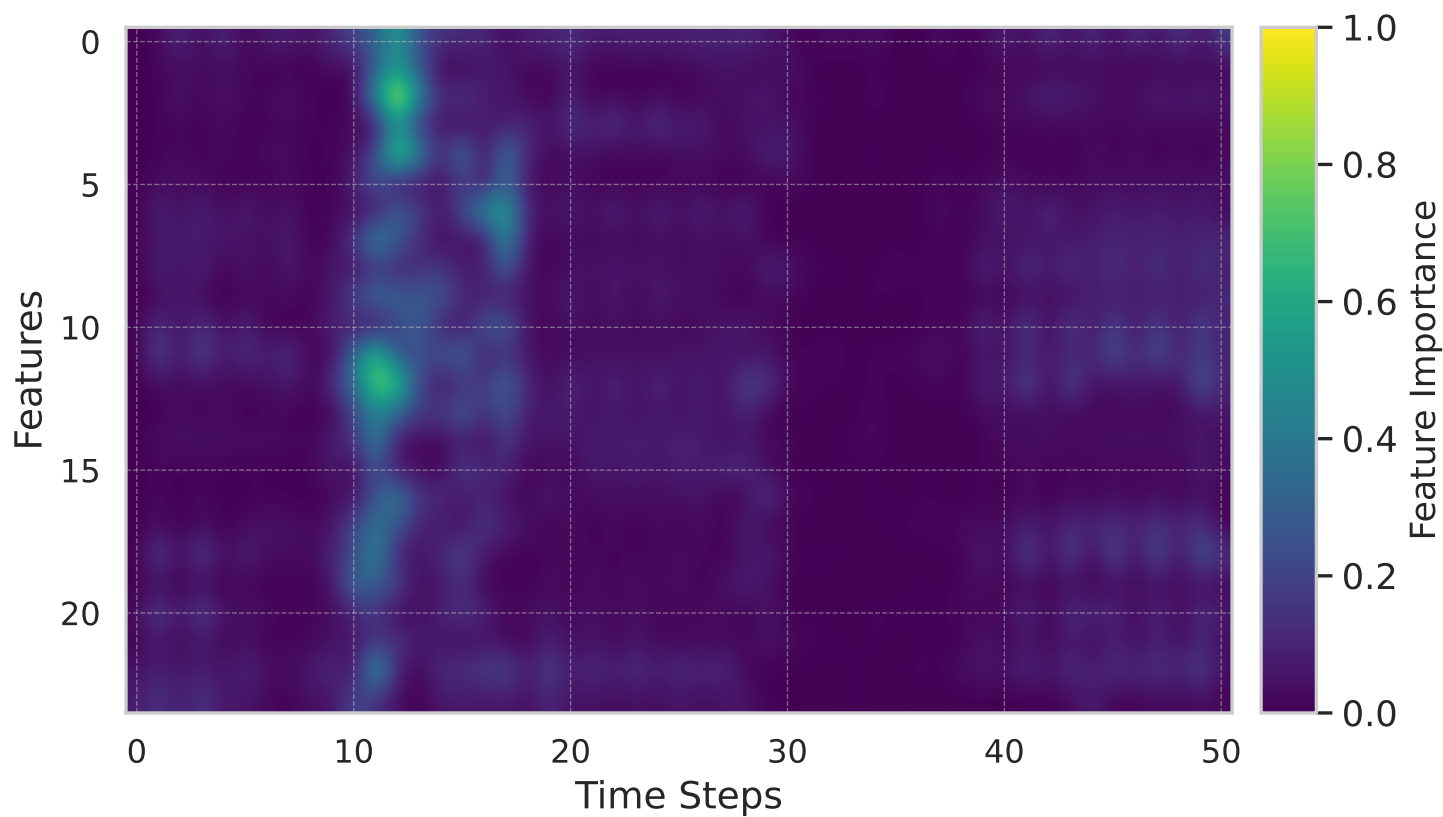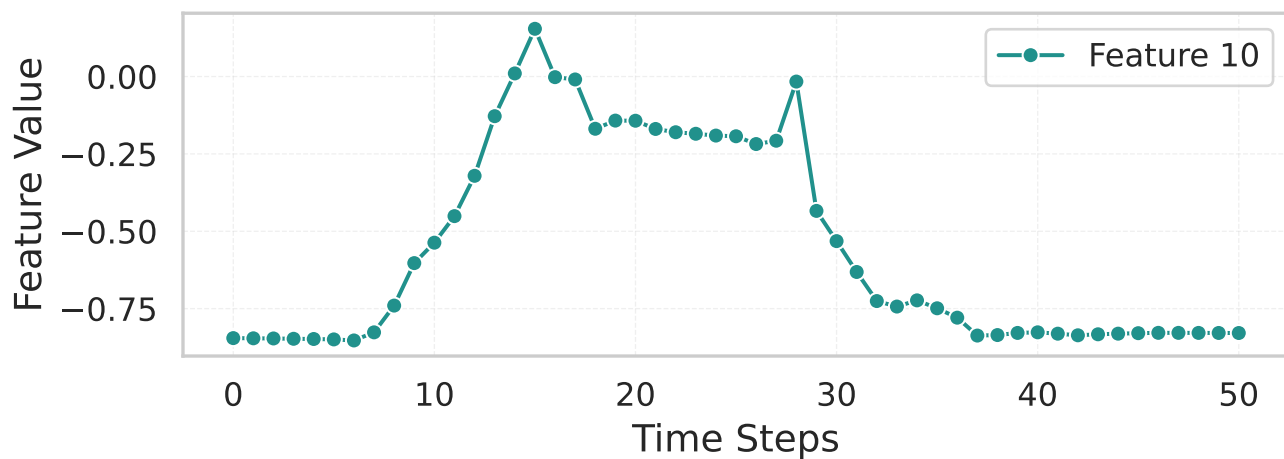

Sample Index: 150

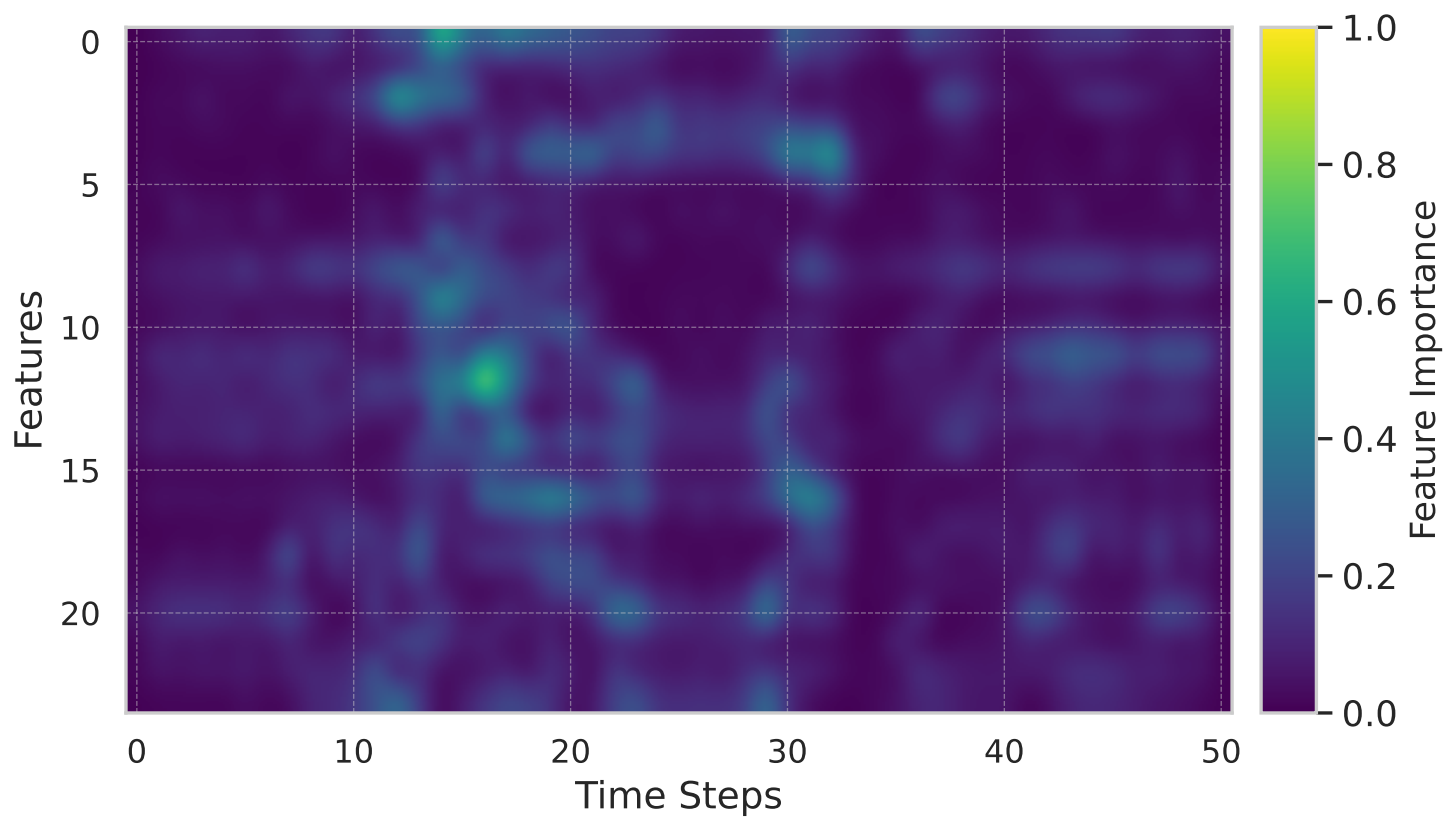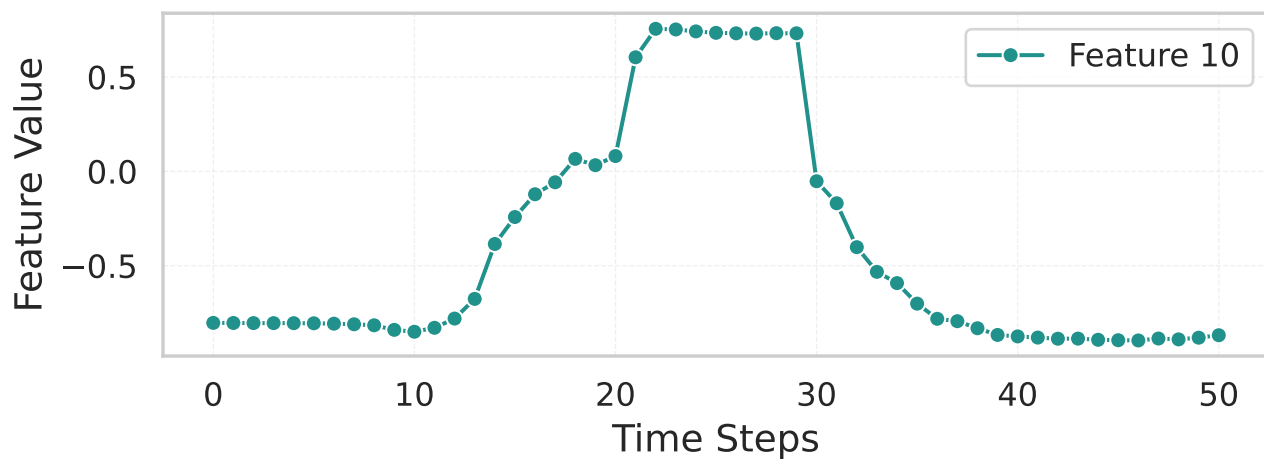

Sample Index: 151

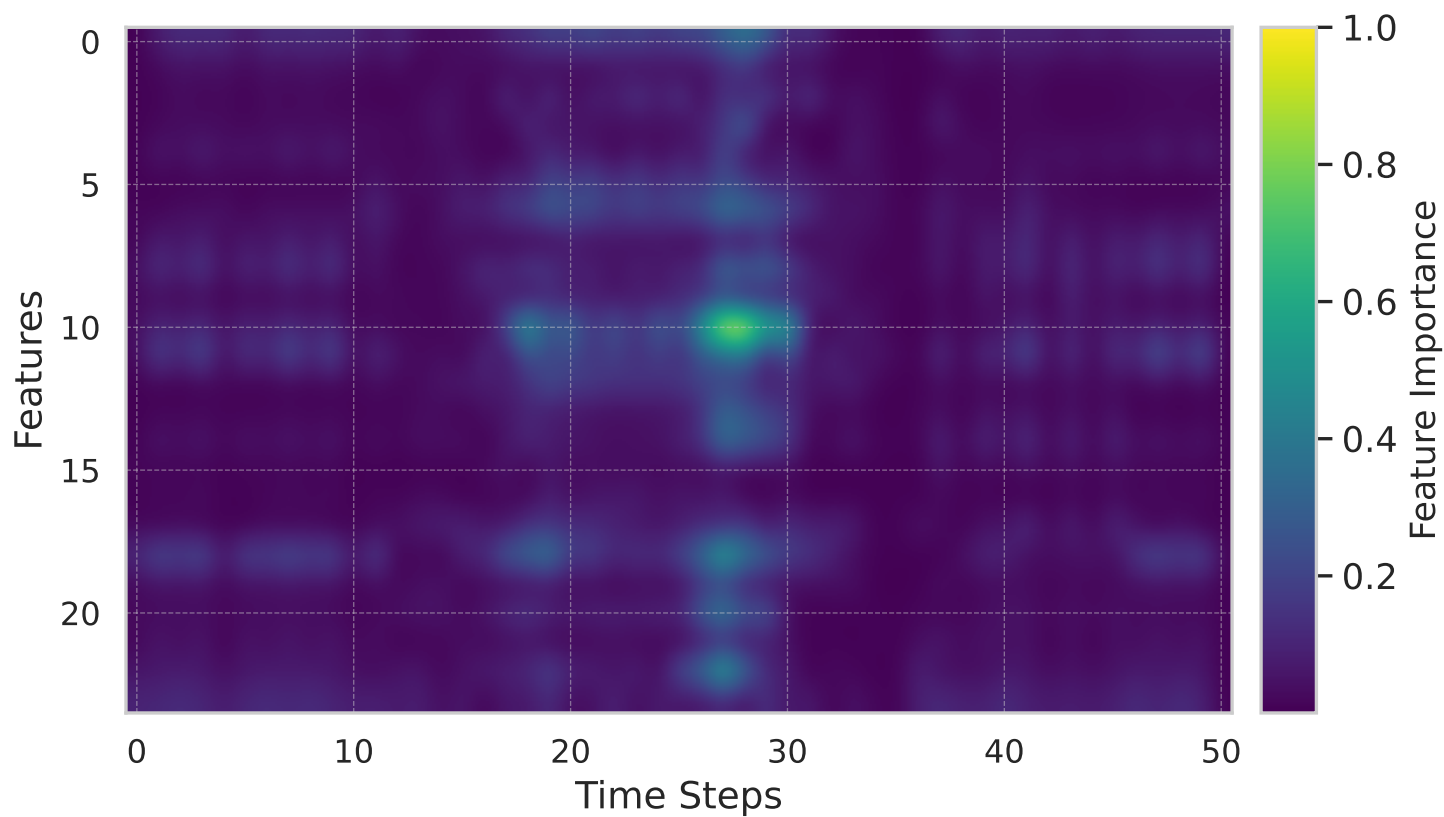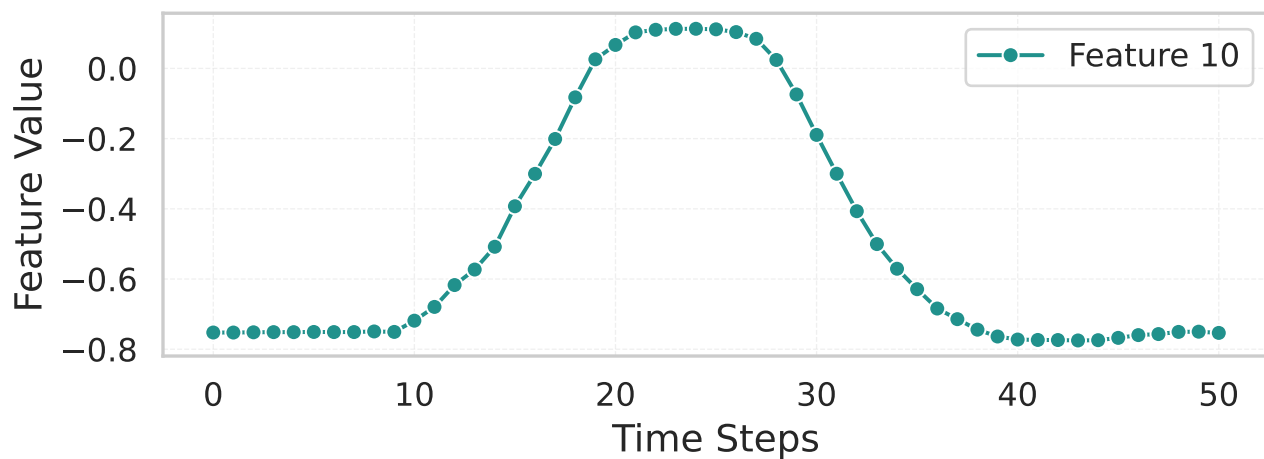

Sample Index: 152

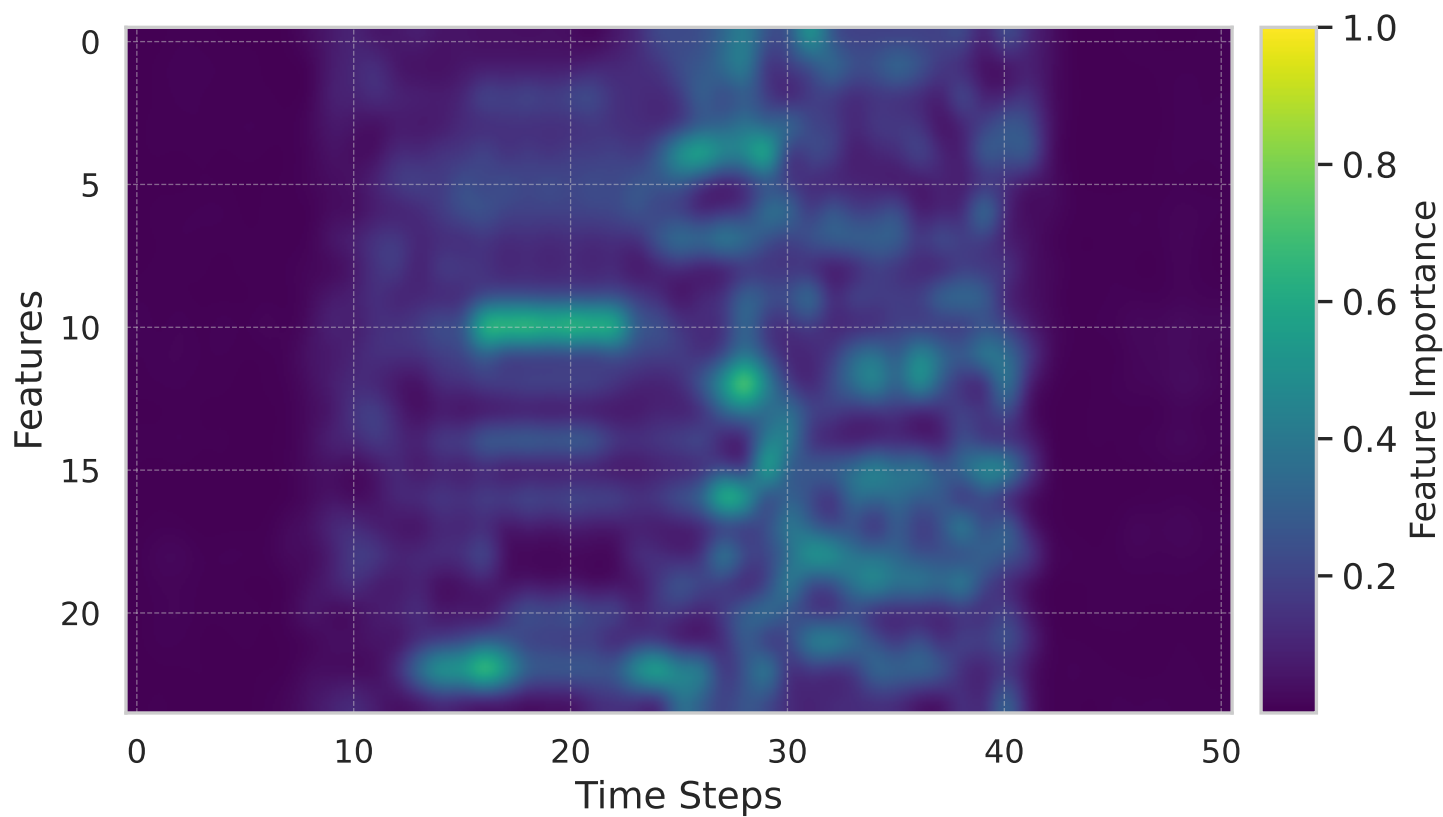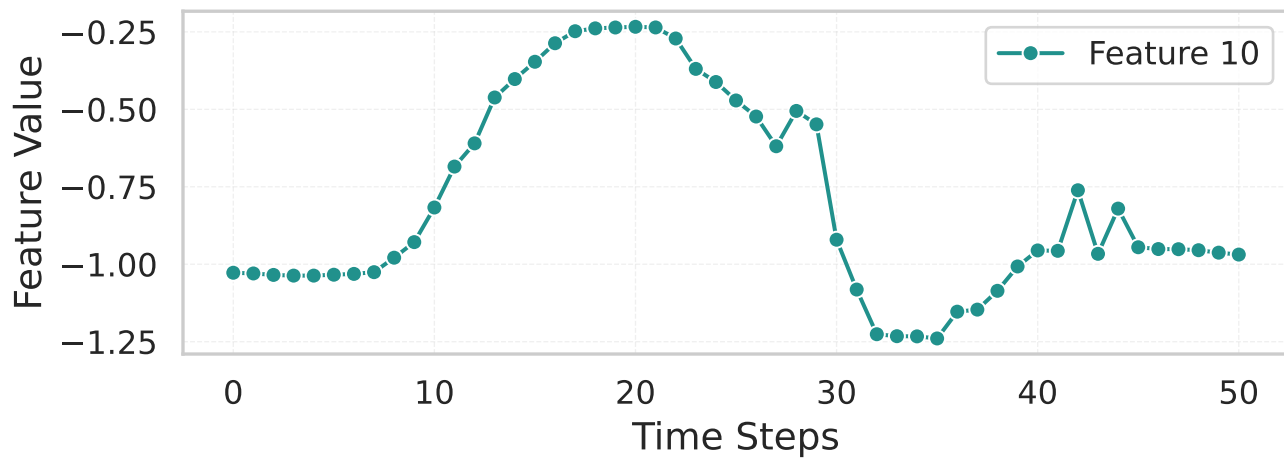

Sample Index: 153

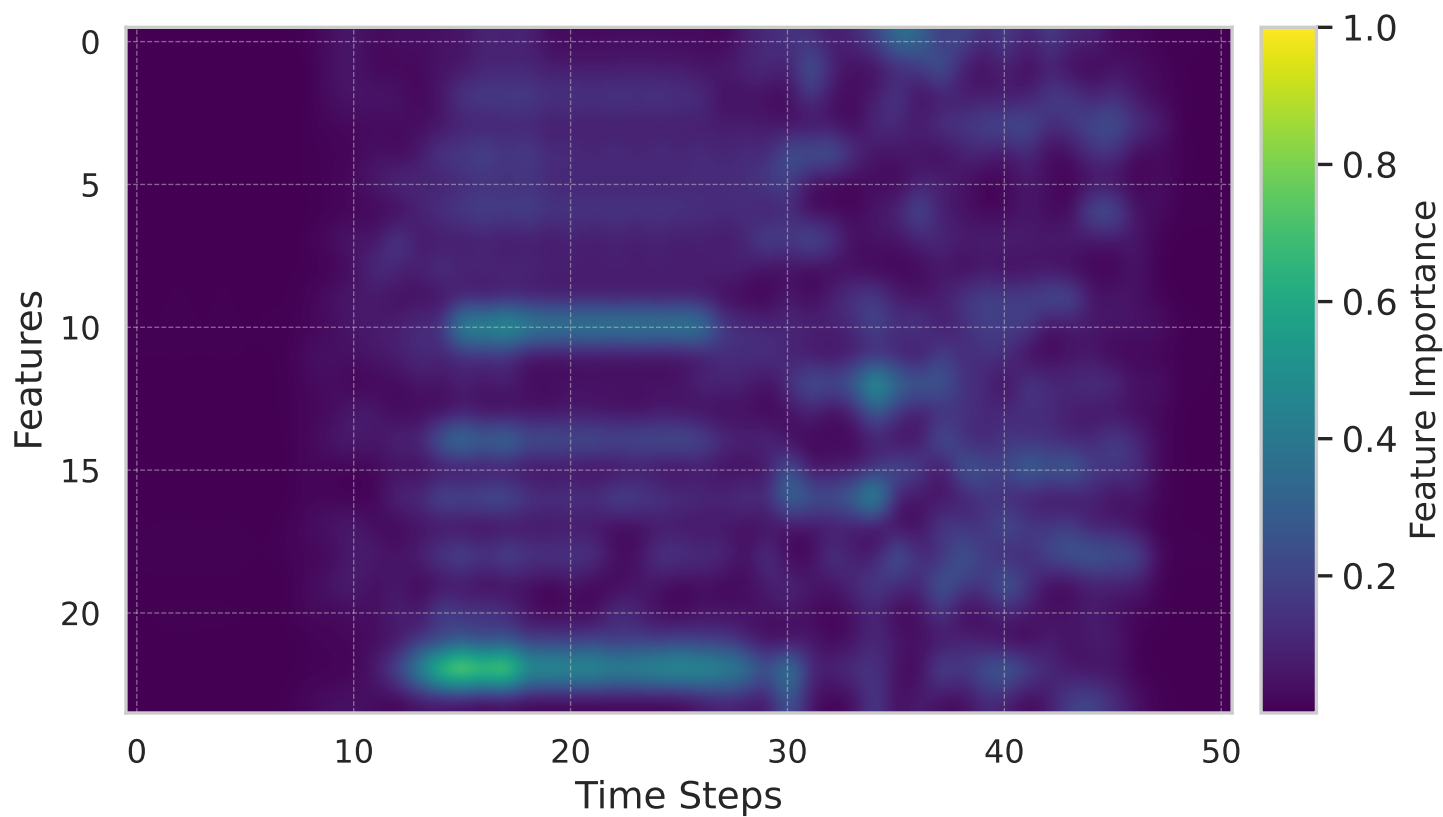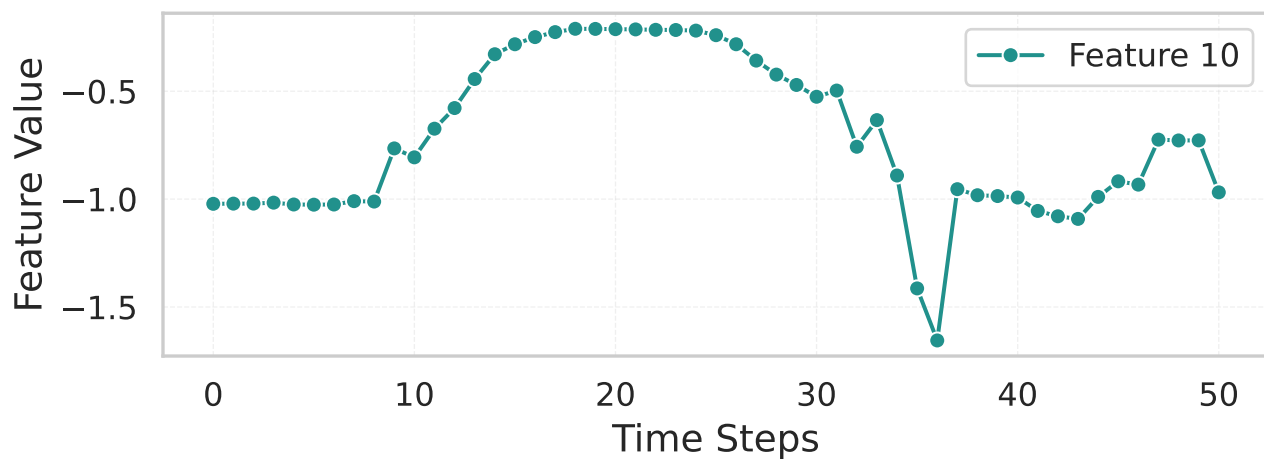

Sample Index: 154

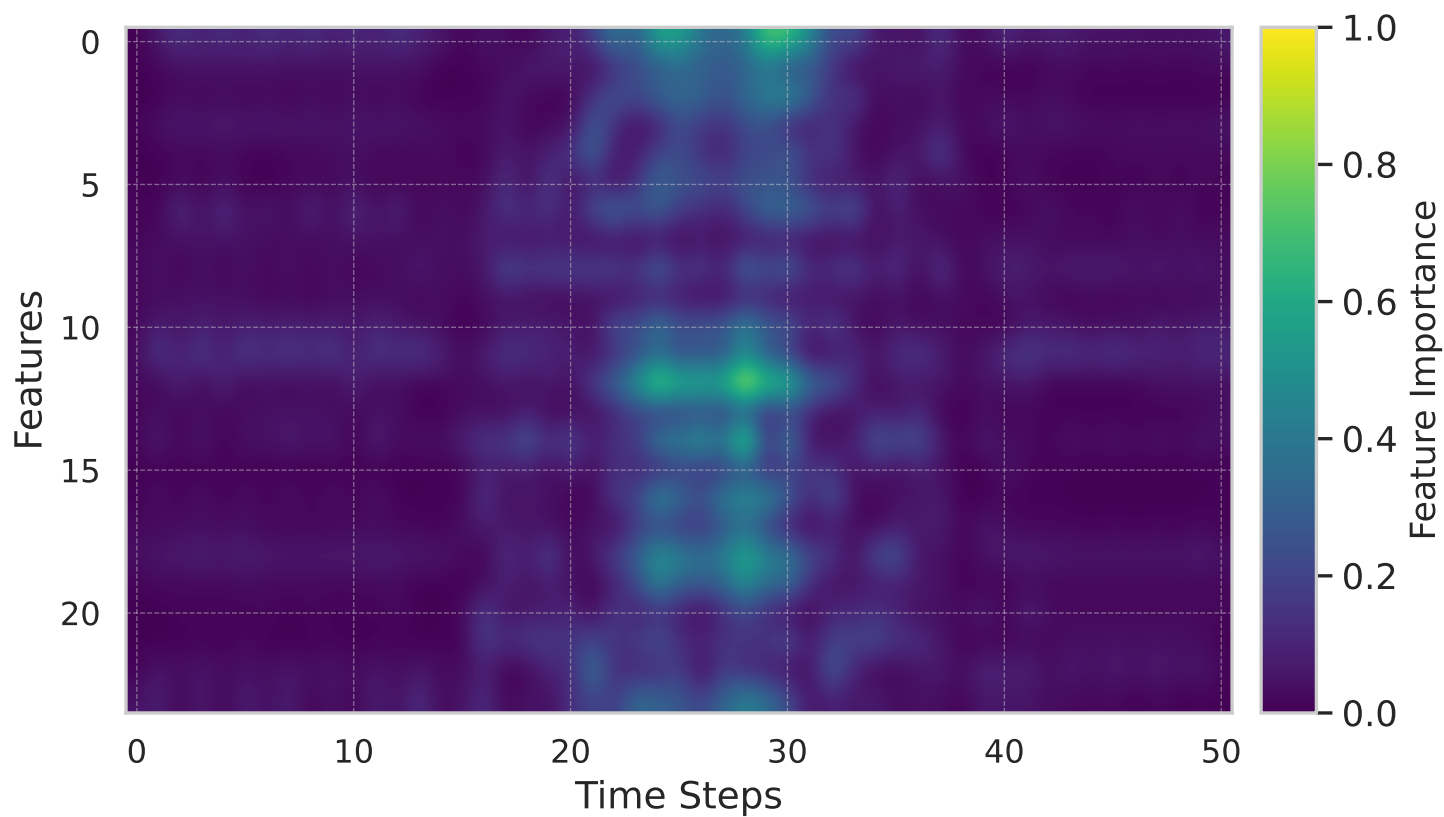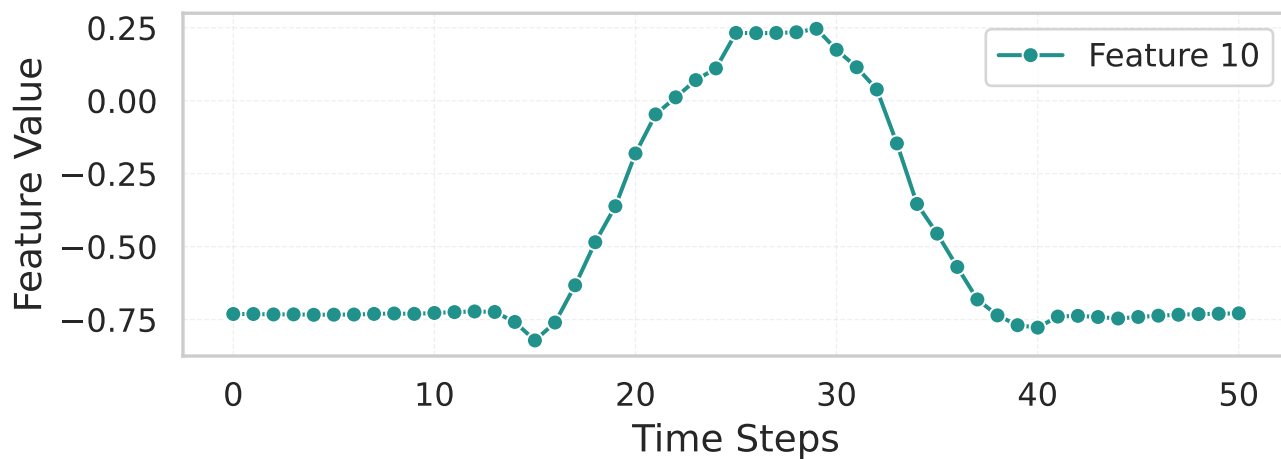

Sample Index: 155

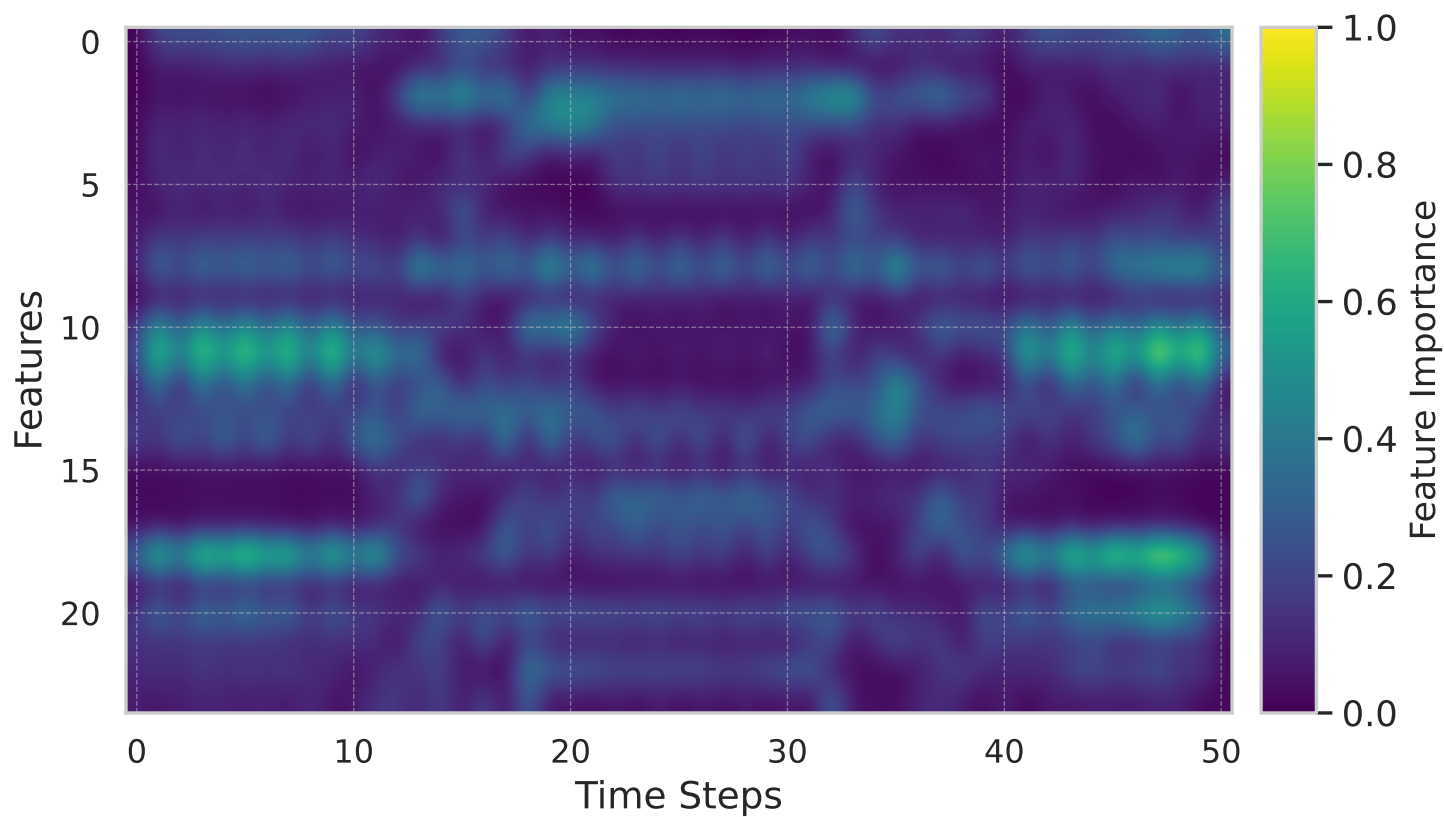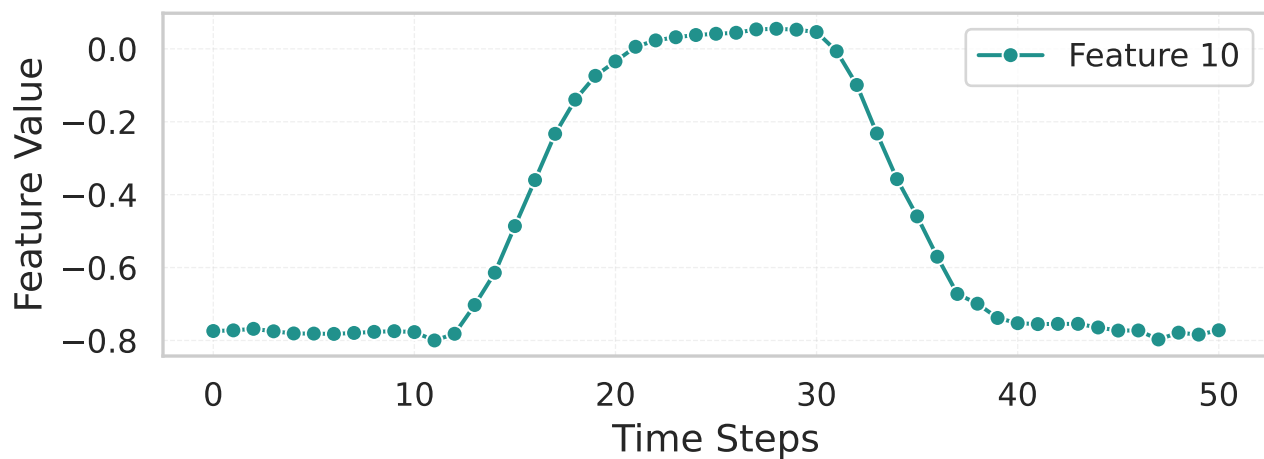



Sample Index: 156

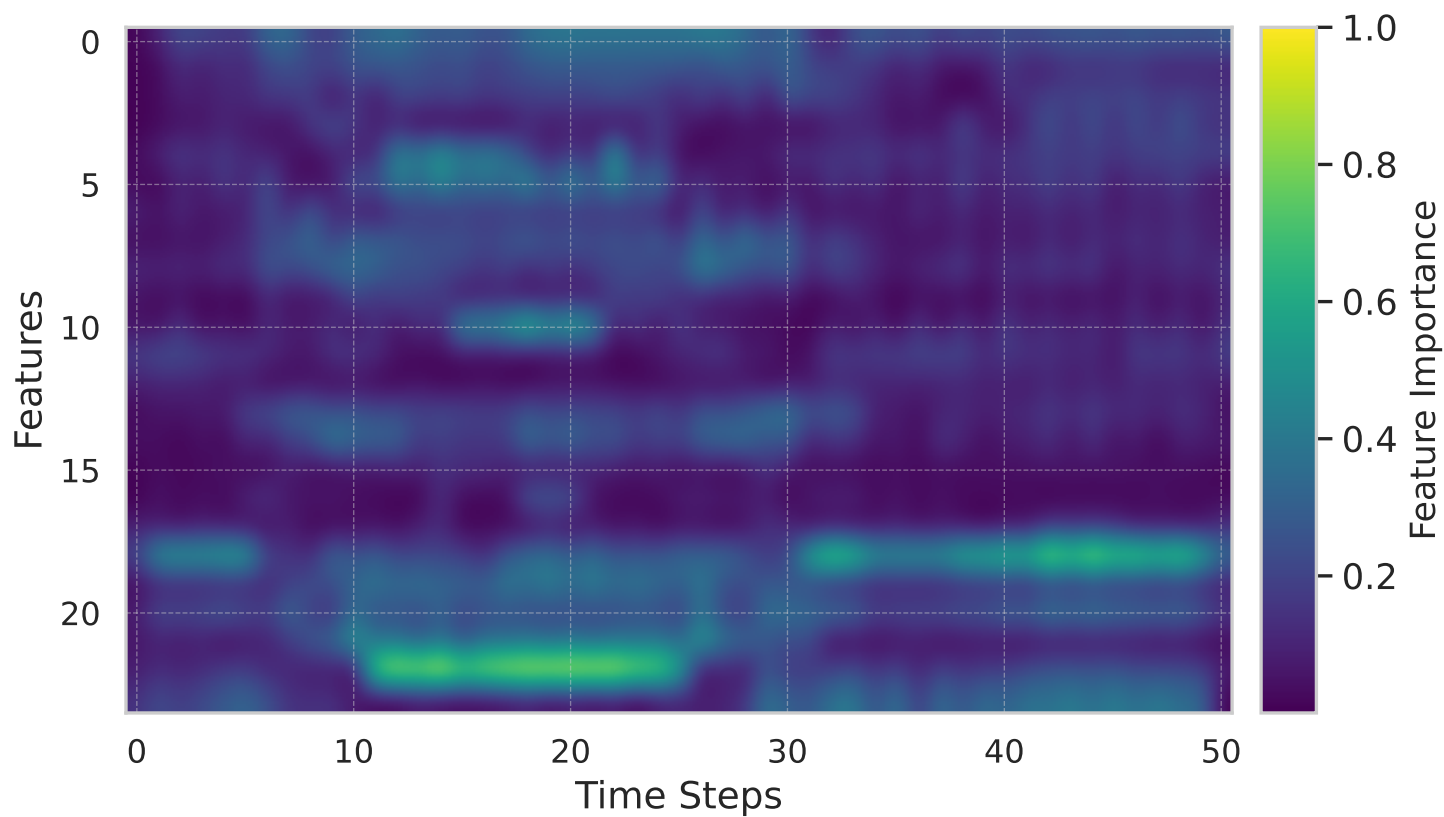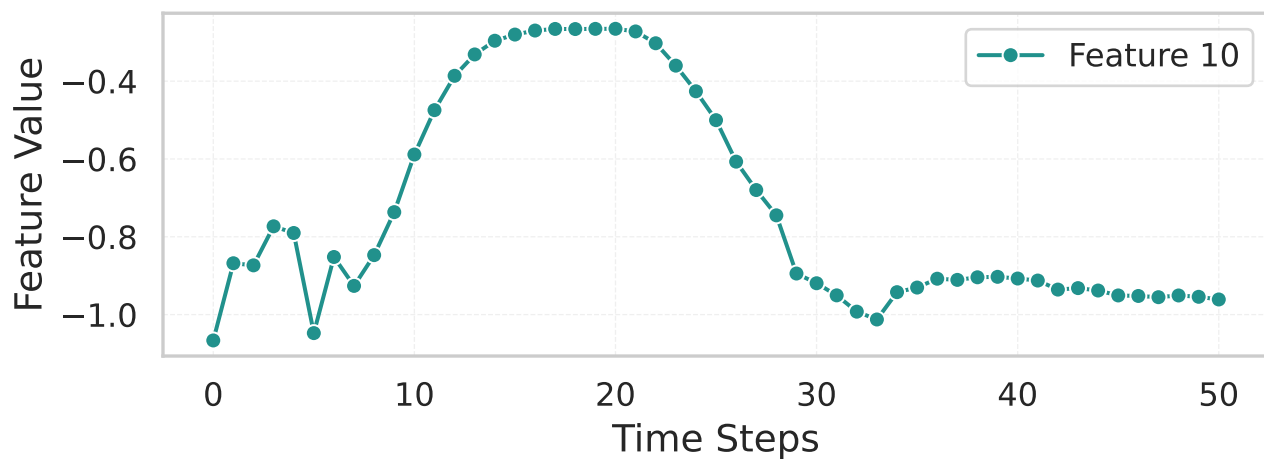

Sample Index: 157

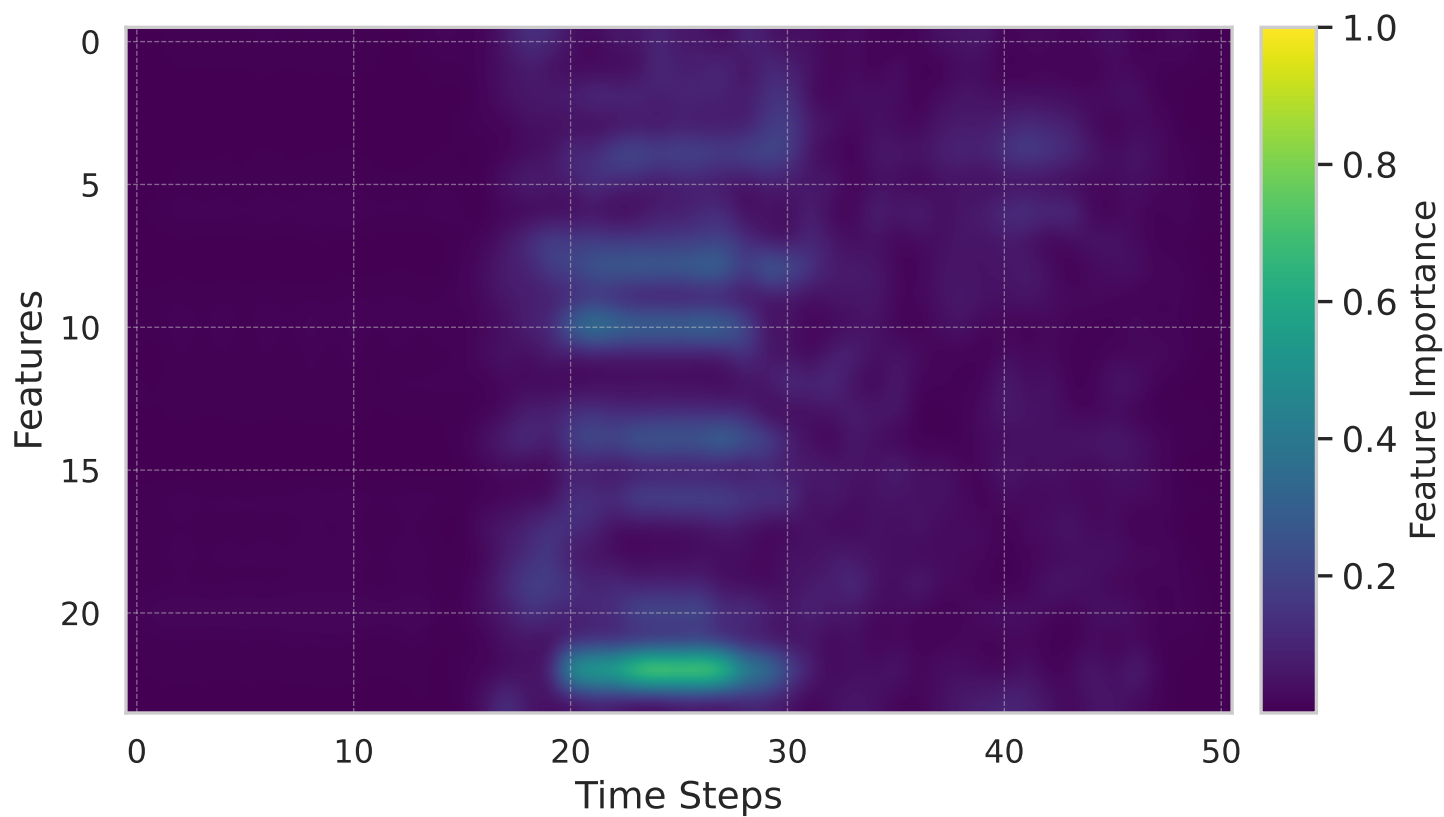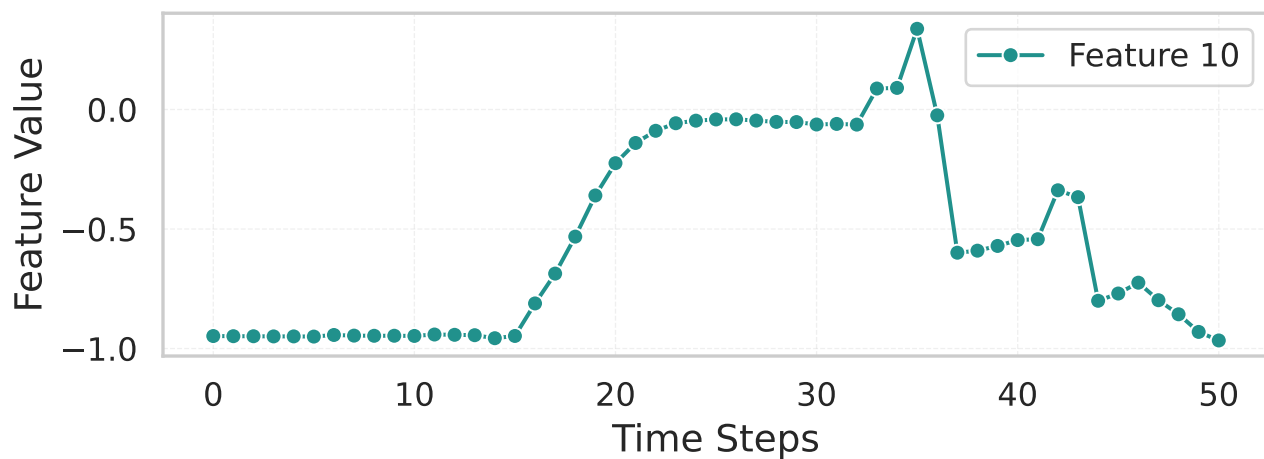

Sample Index: 158

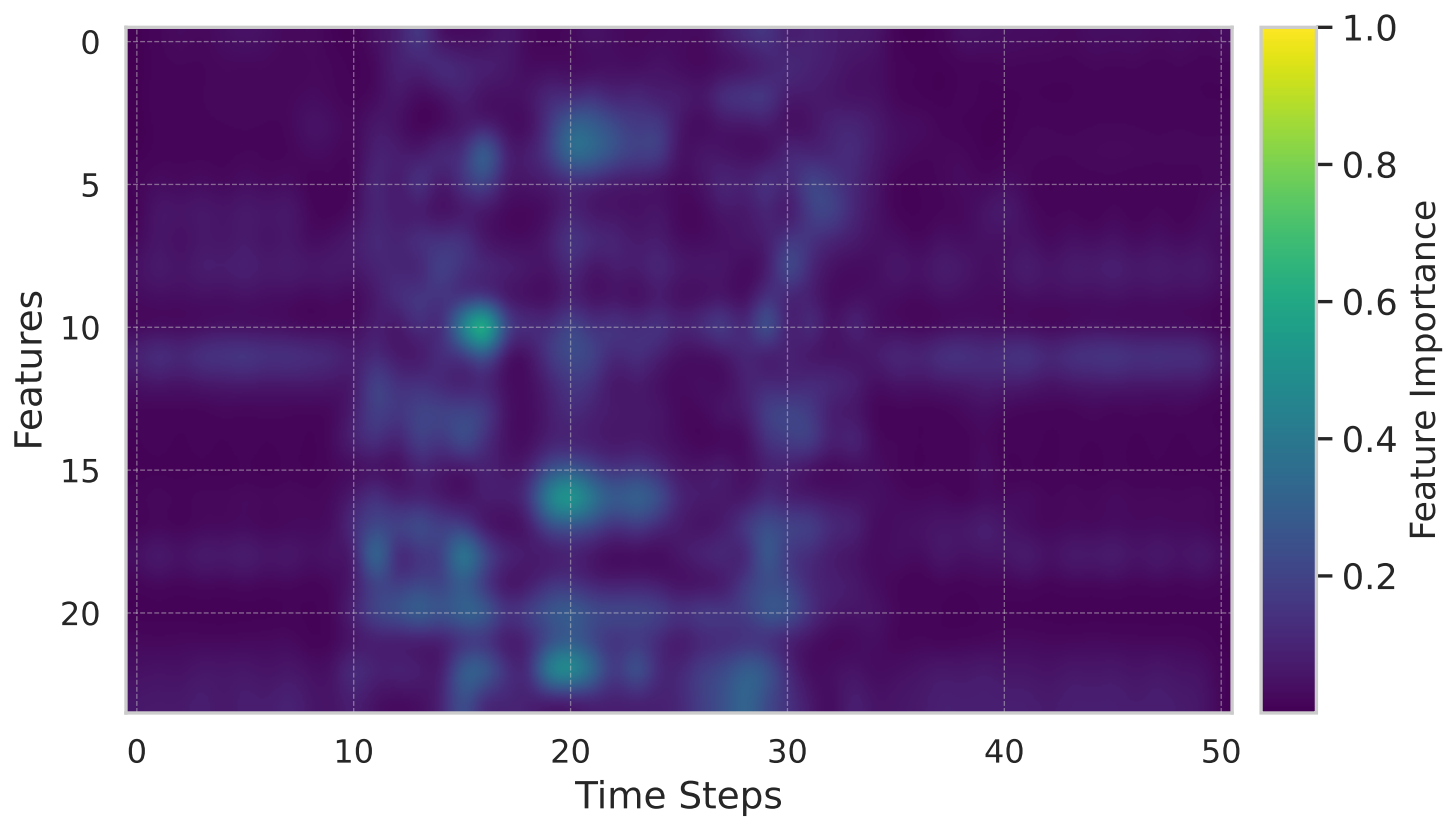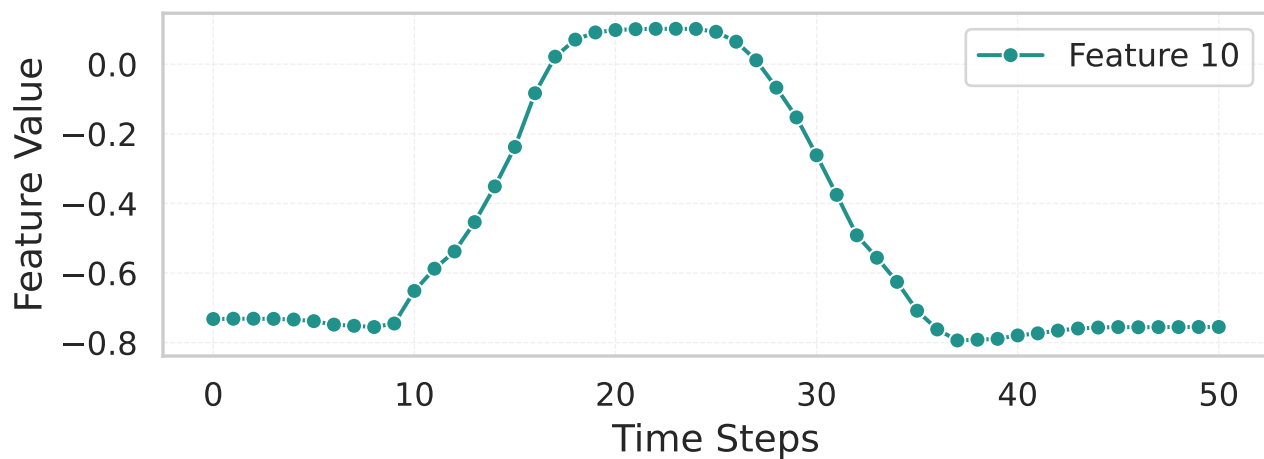

Sample Index: 159

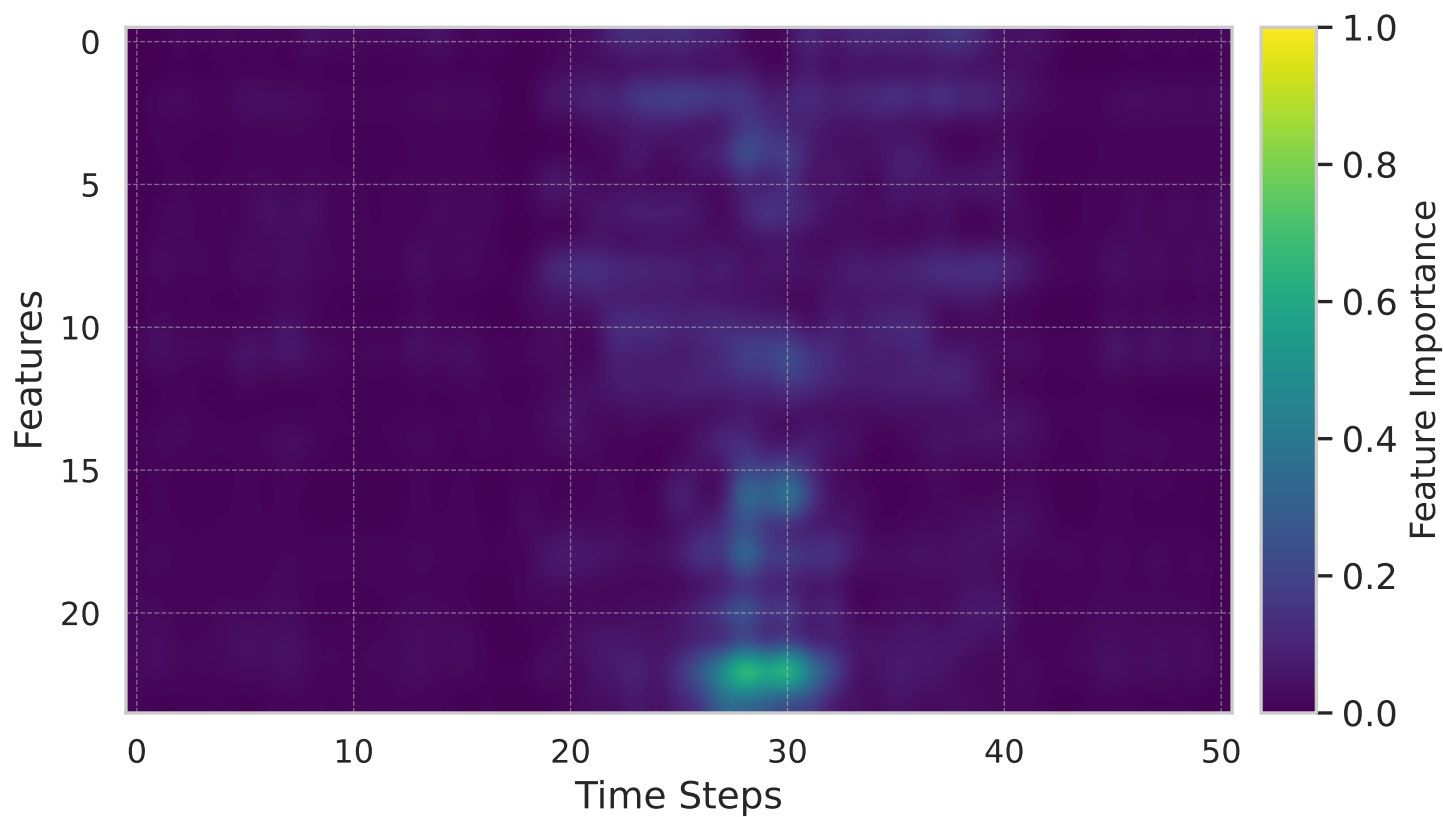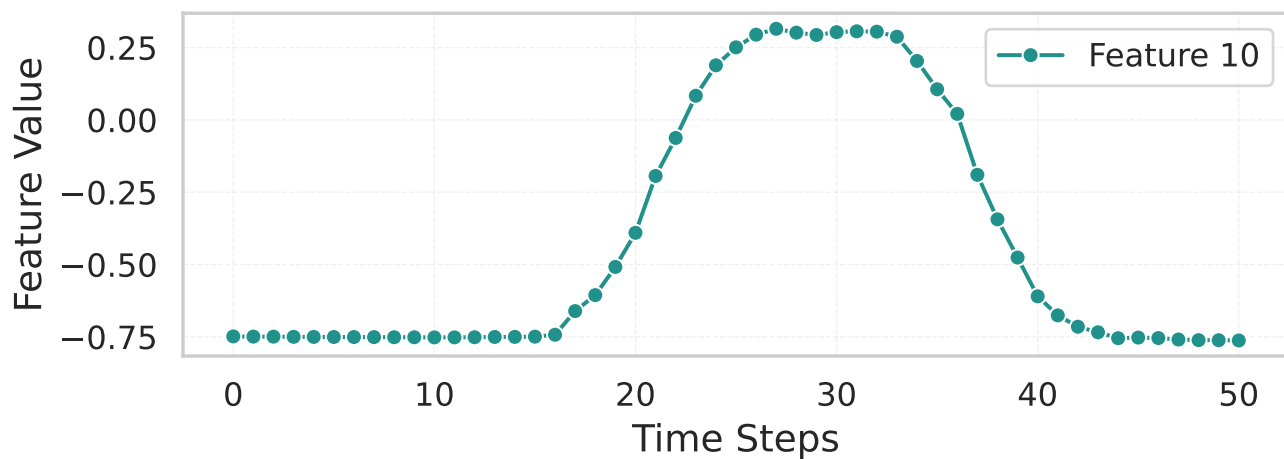

Sample Index: 160

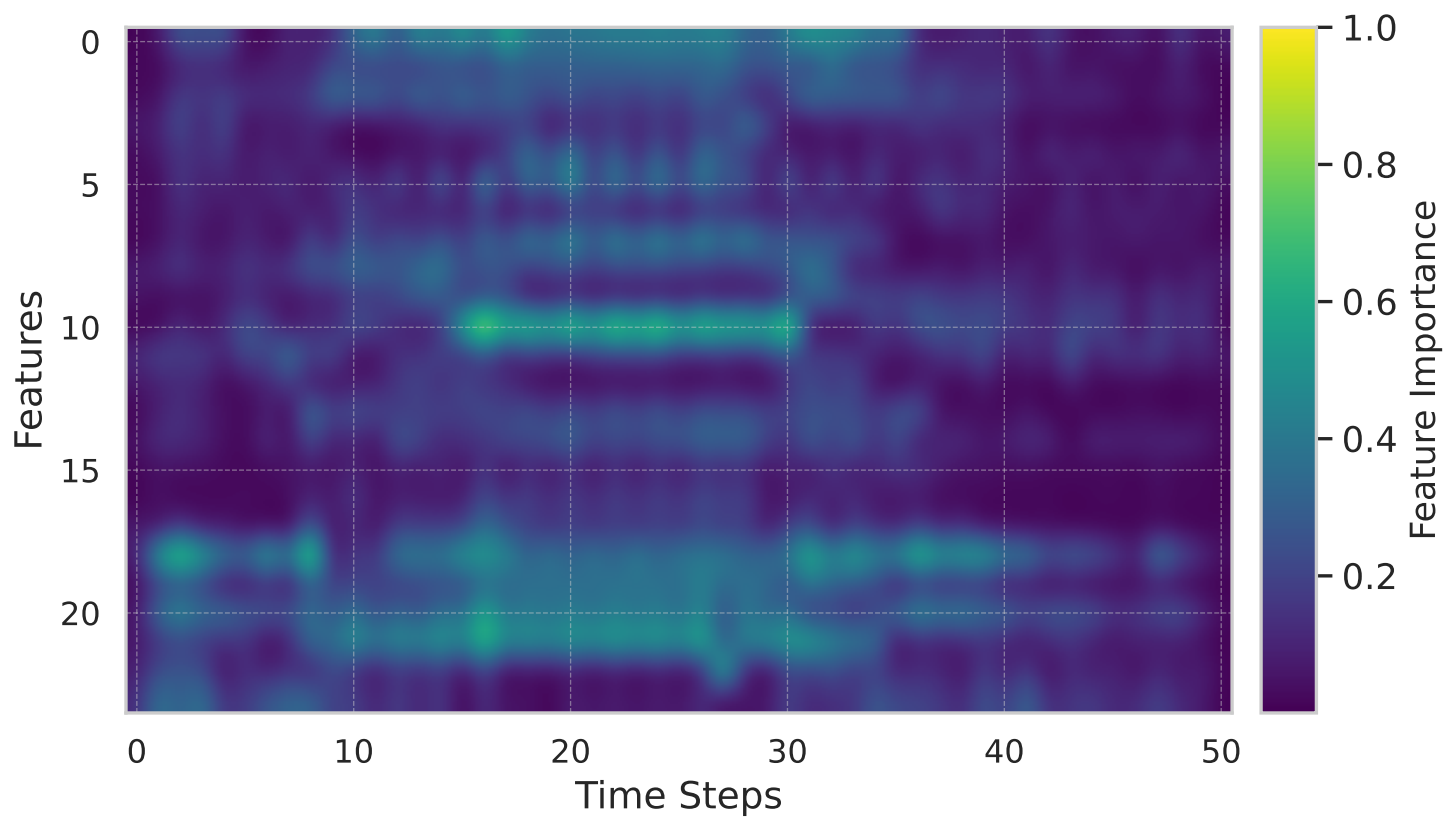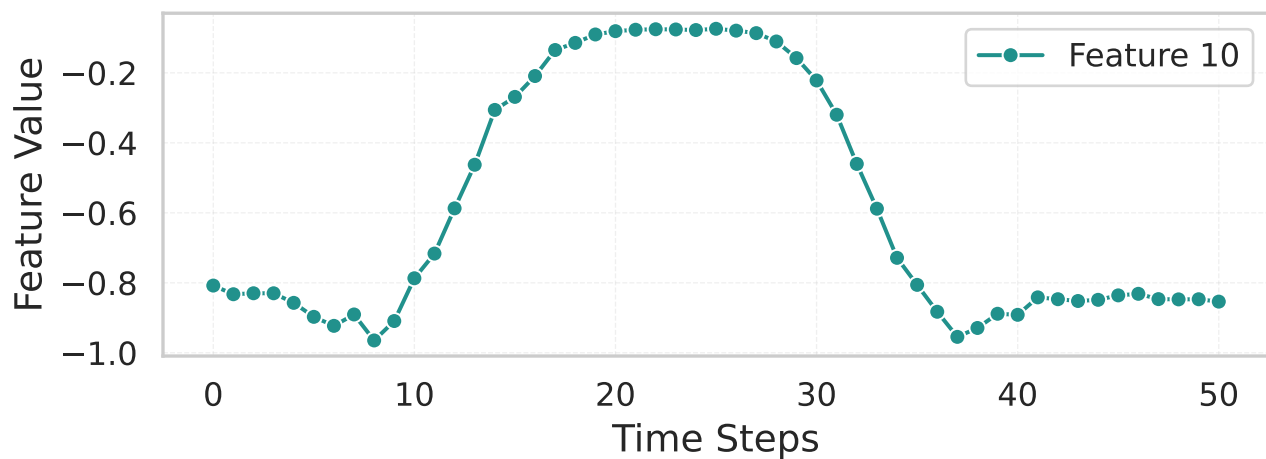

Sample Index: 161

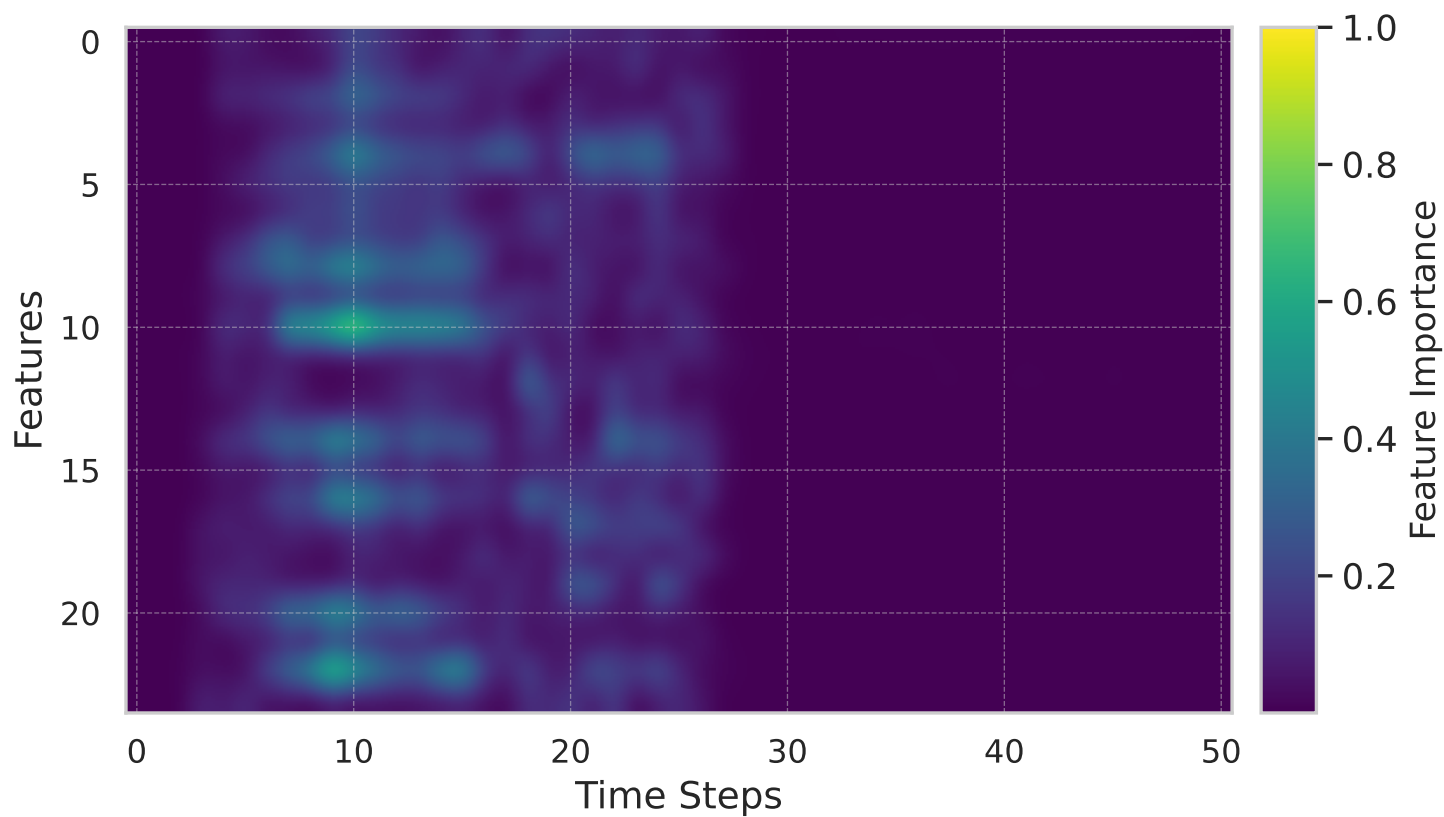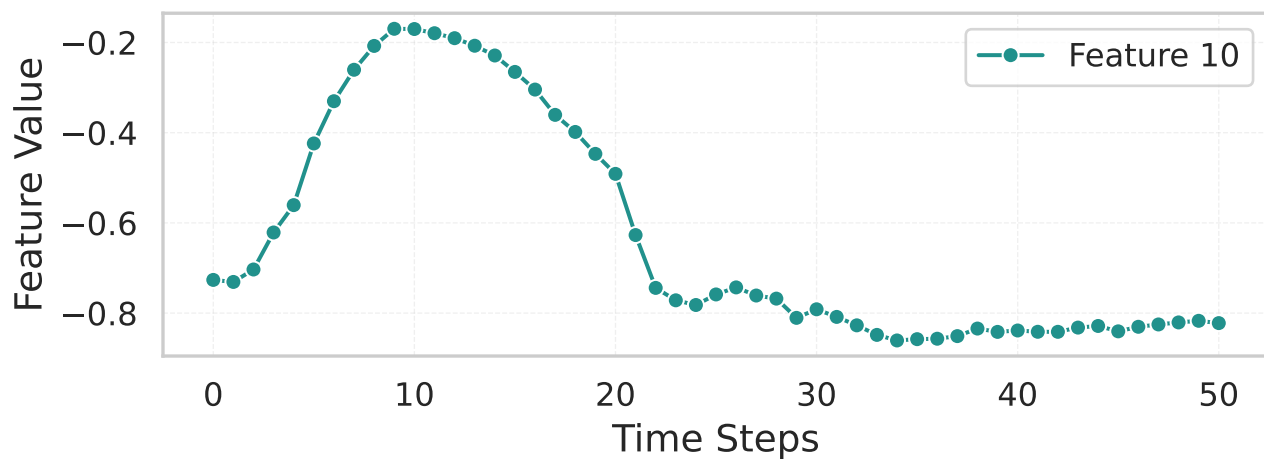

Sample Index: 162

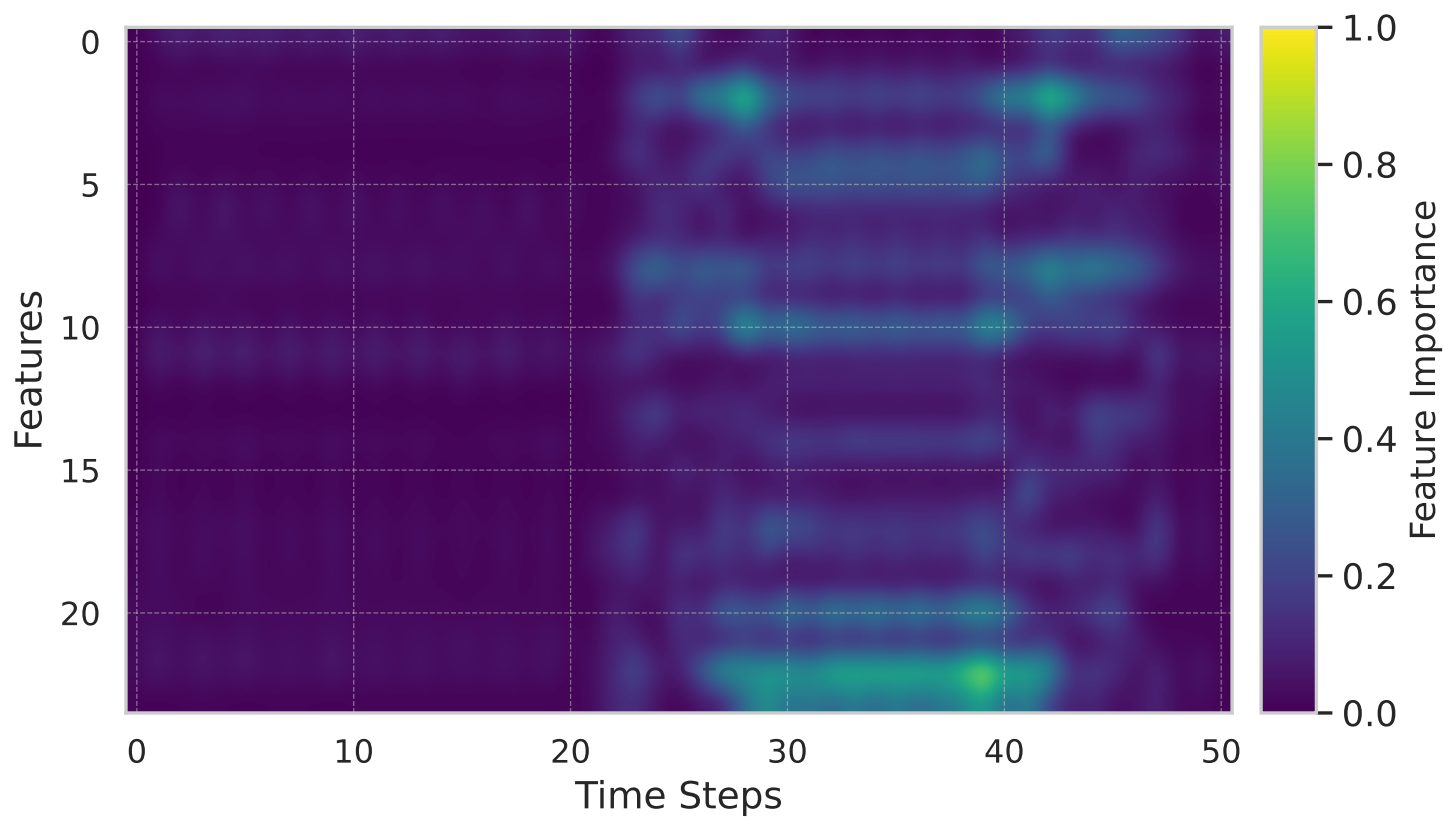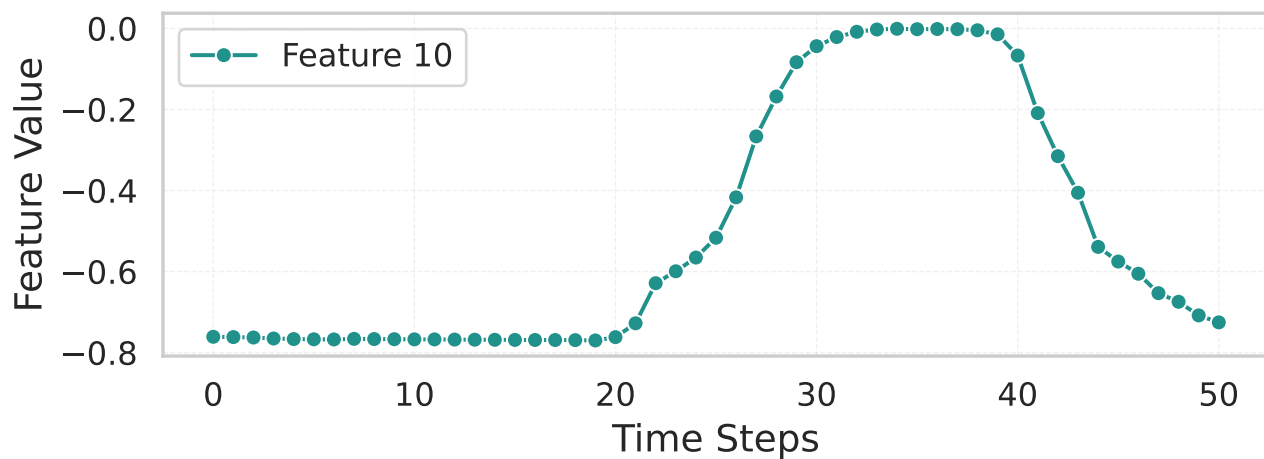

Sample Index: 163

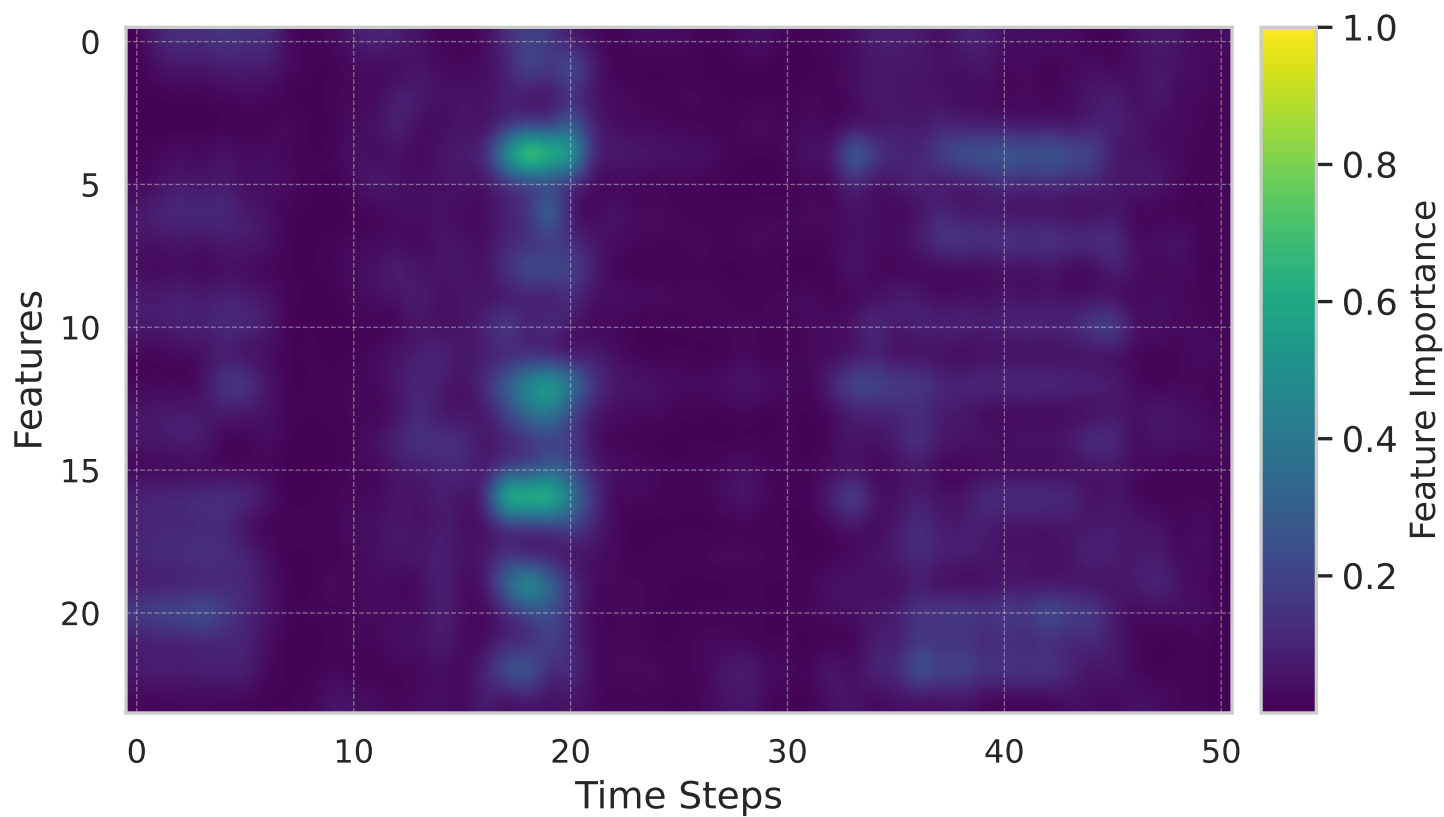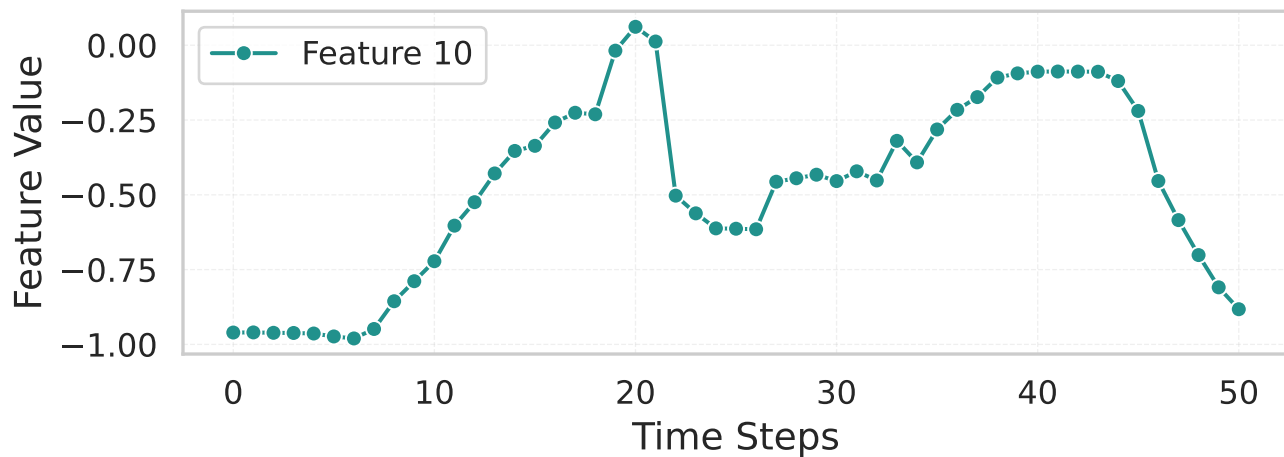



Sample Index: 164

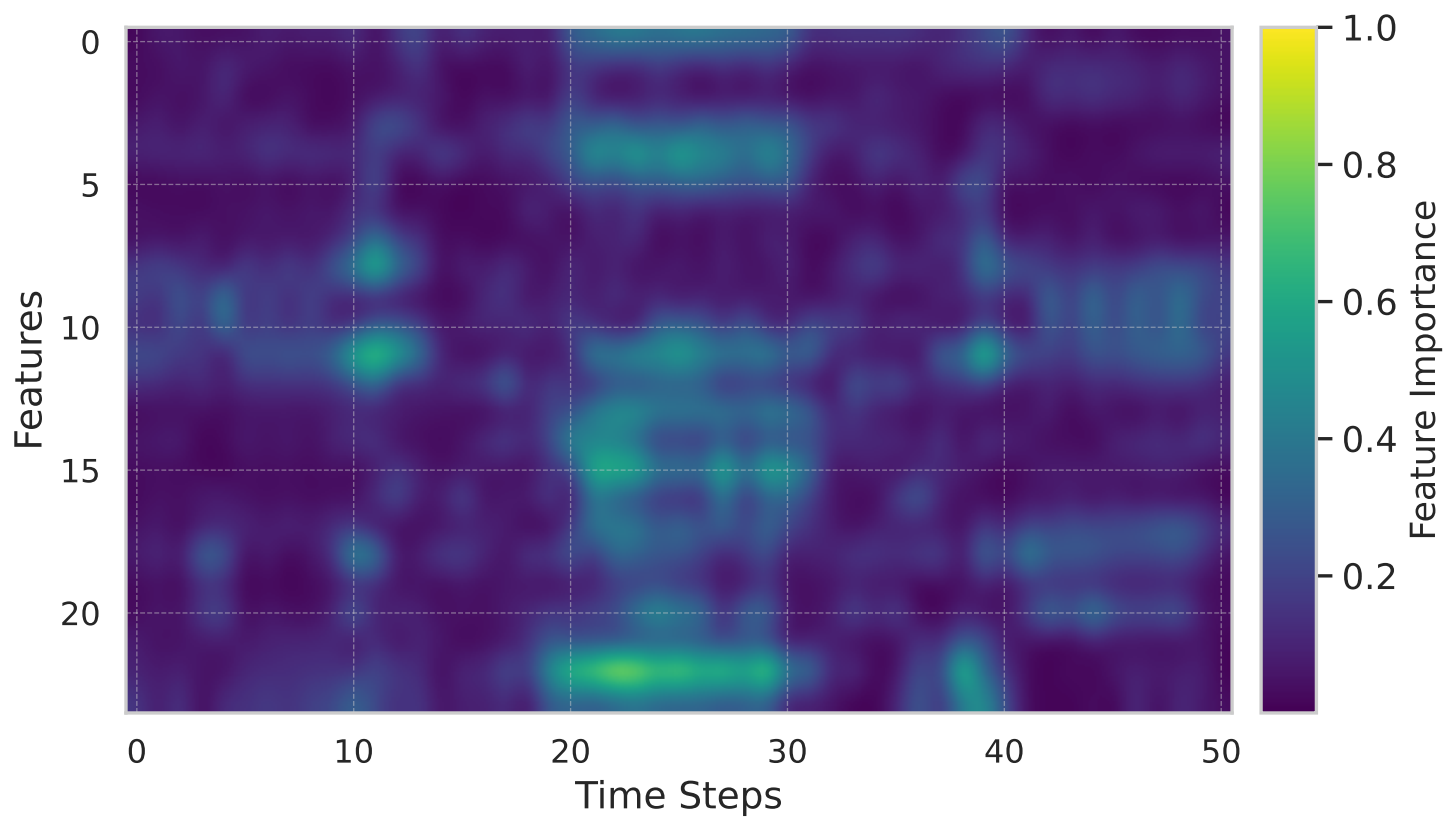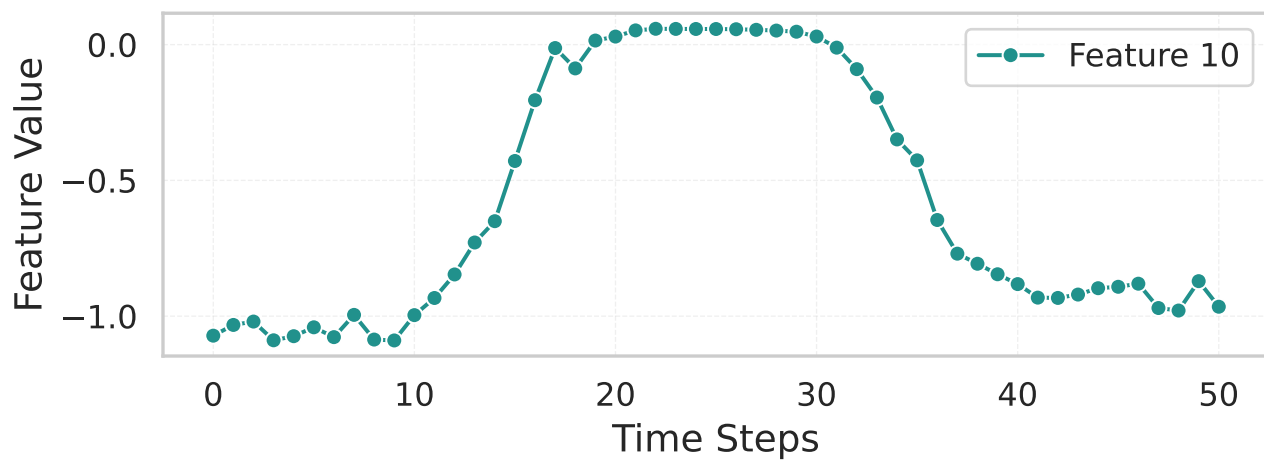

Sample Index: 165

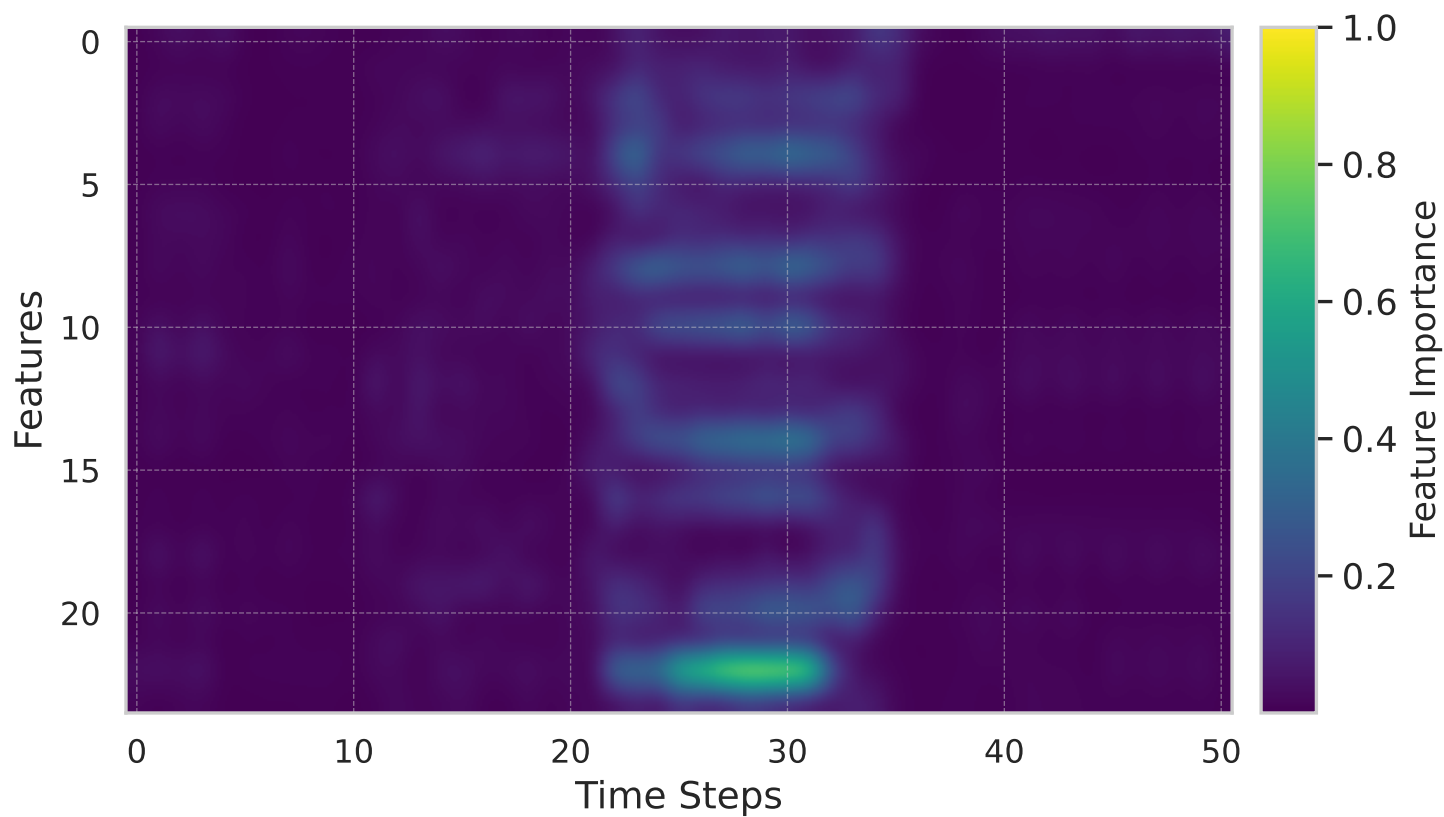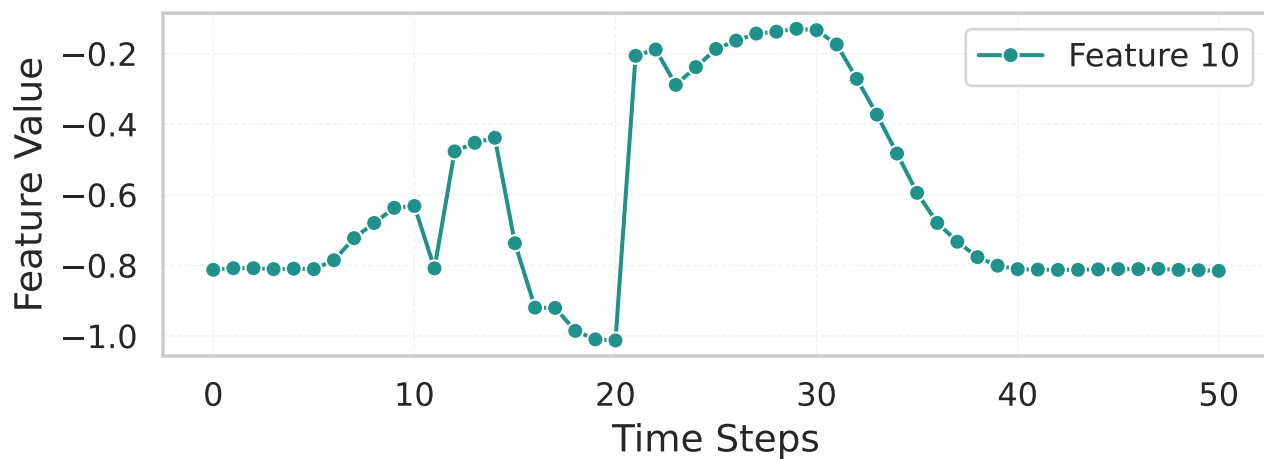

Sample Index: 166

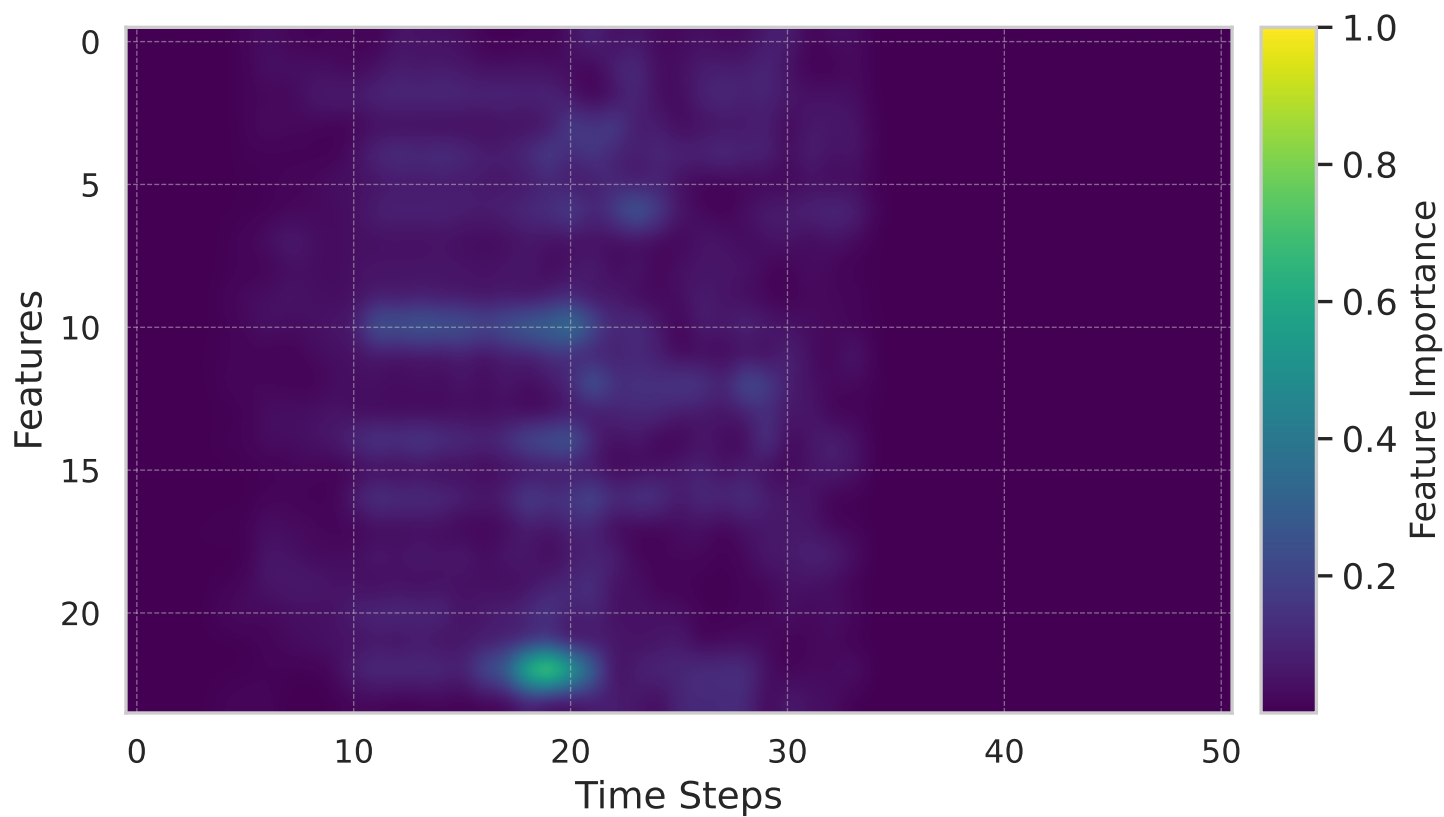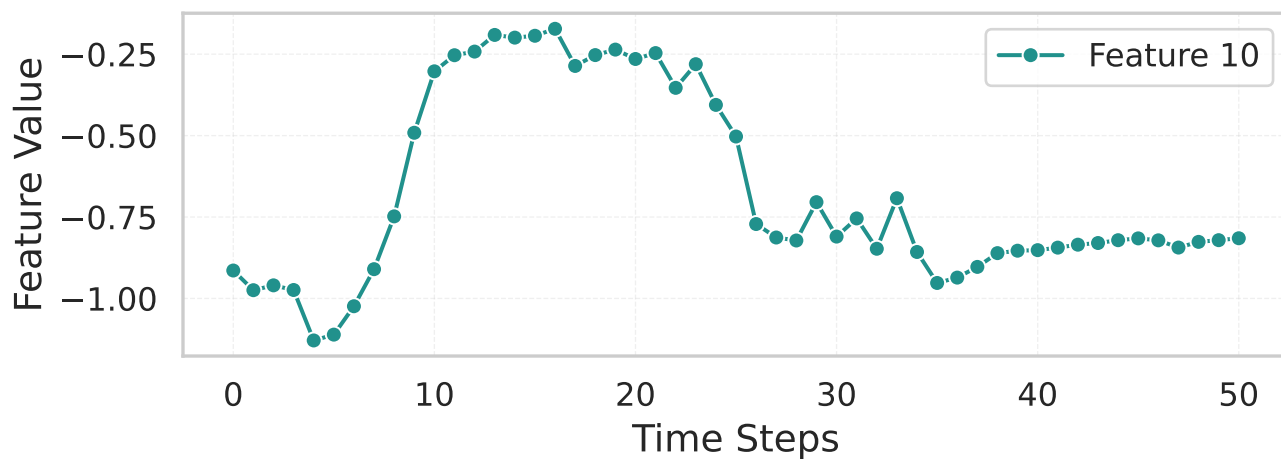

Sample Index: 167

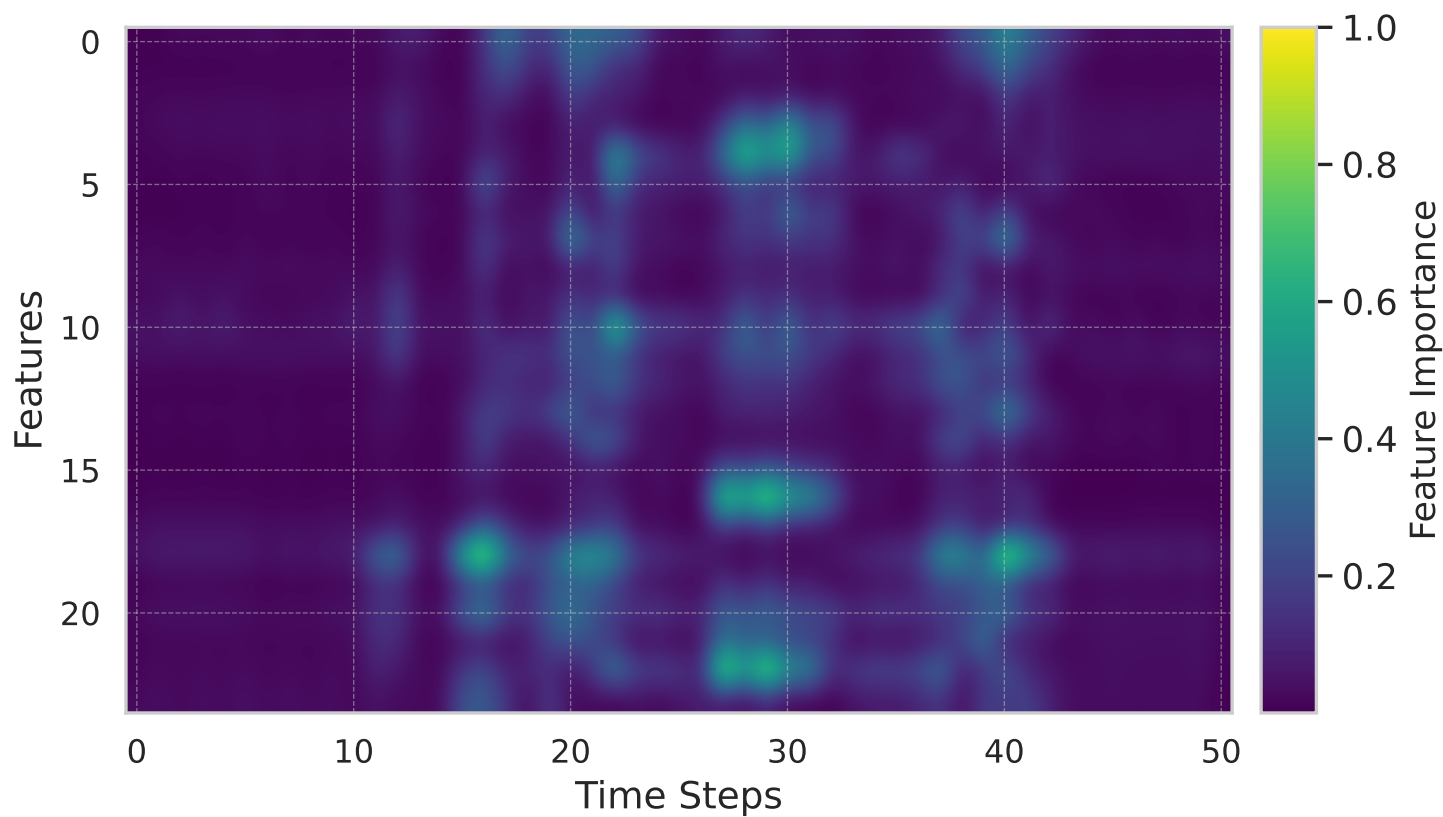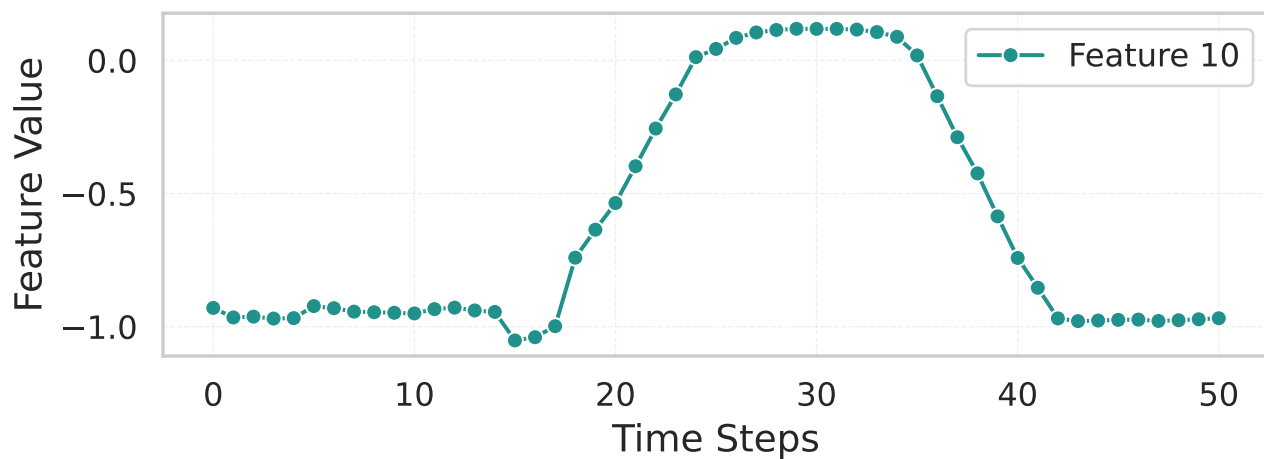

Sample Index: 168

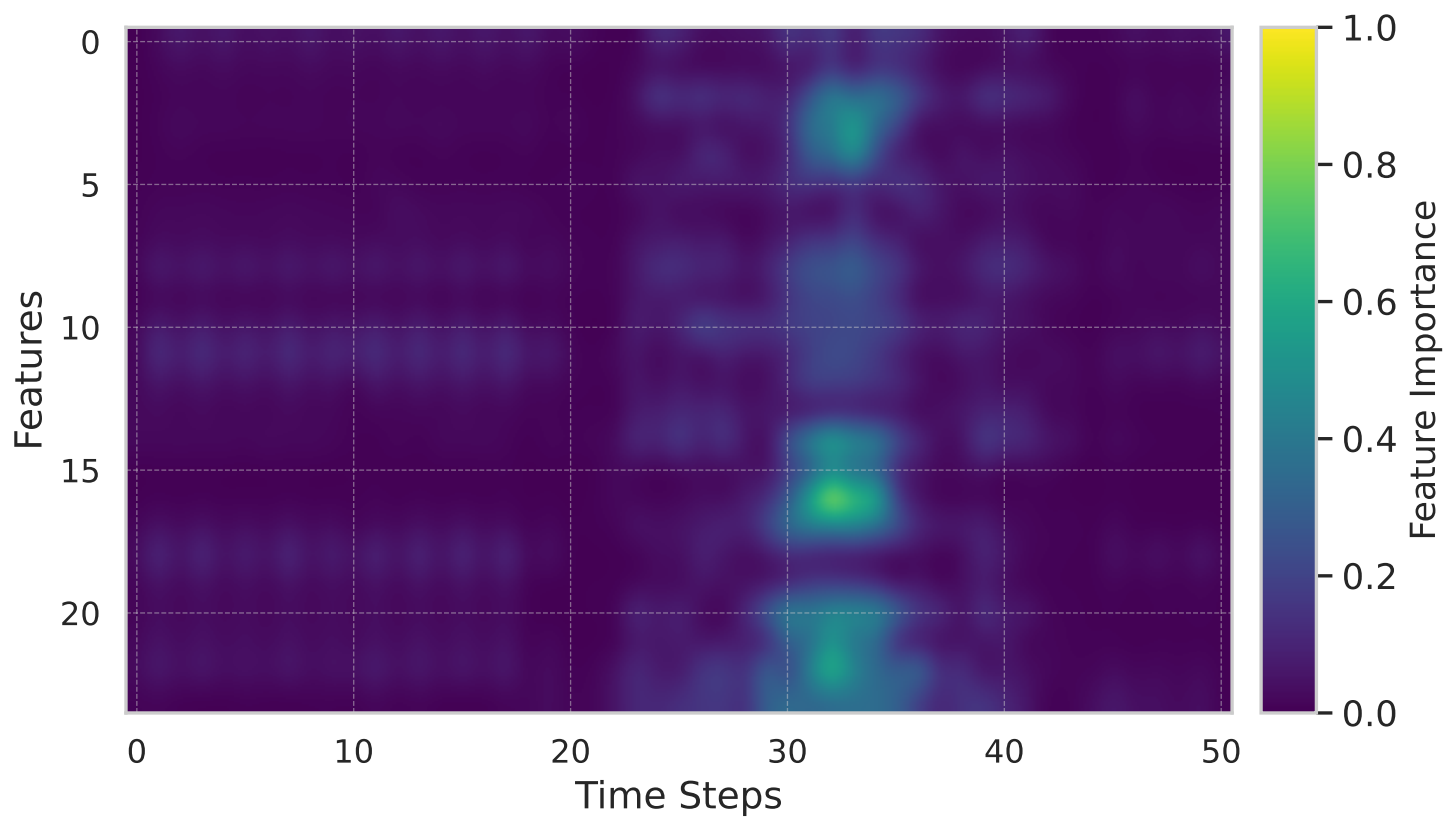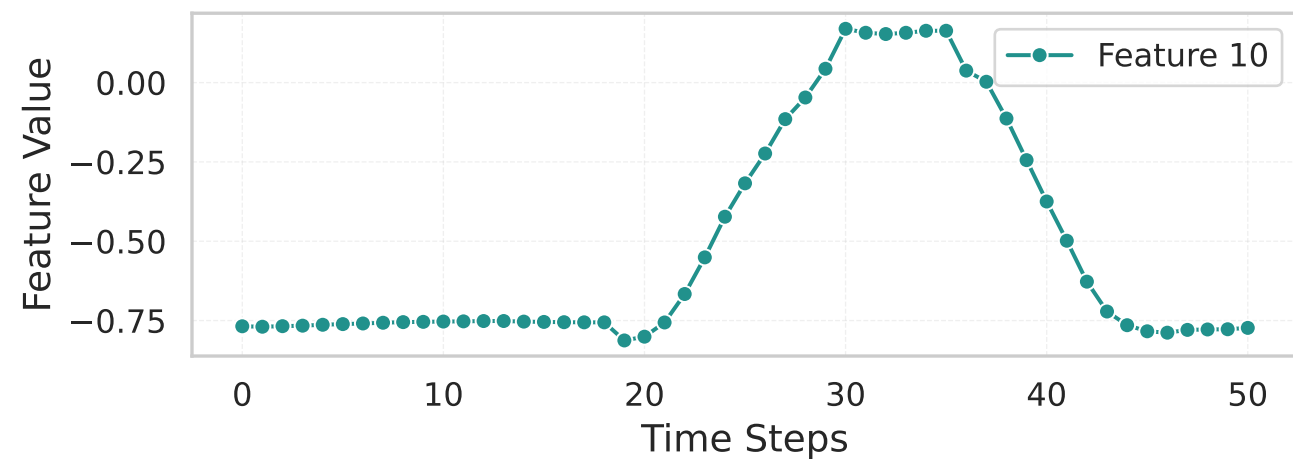

Sample Index: 169

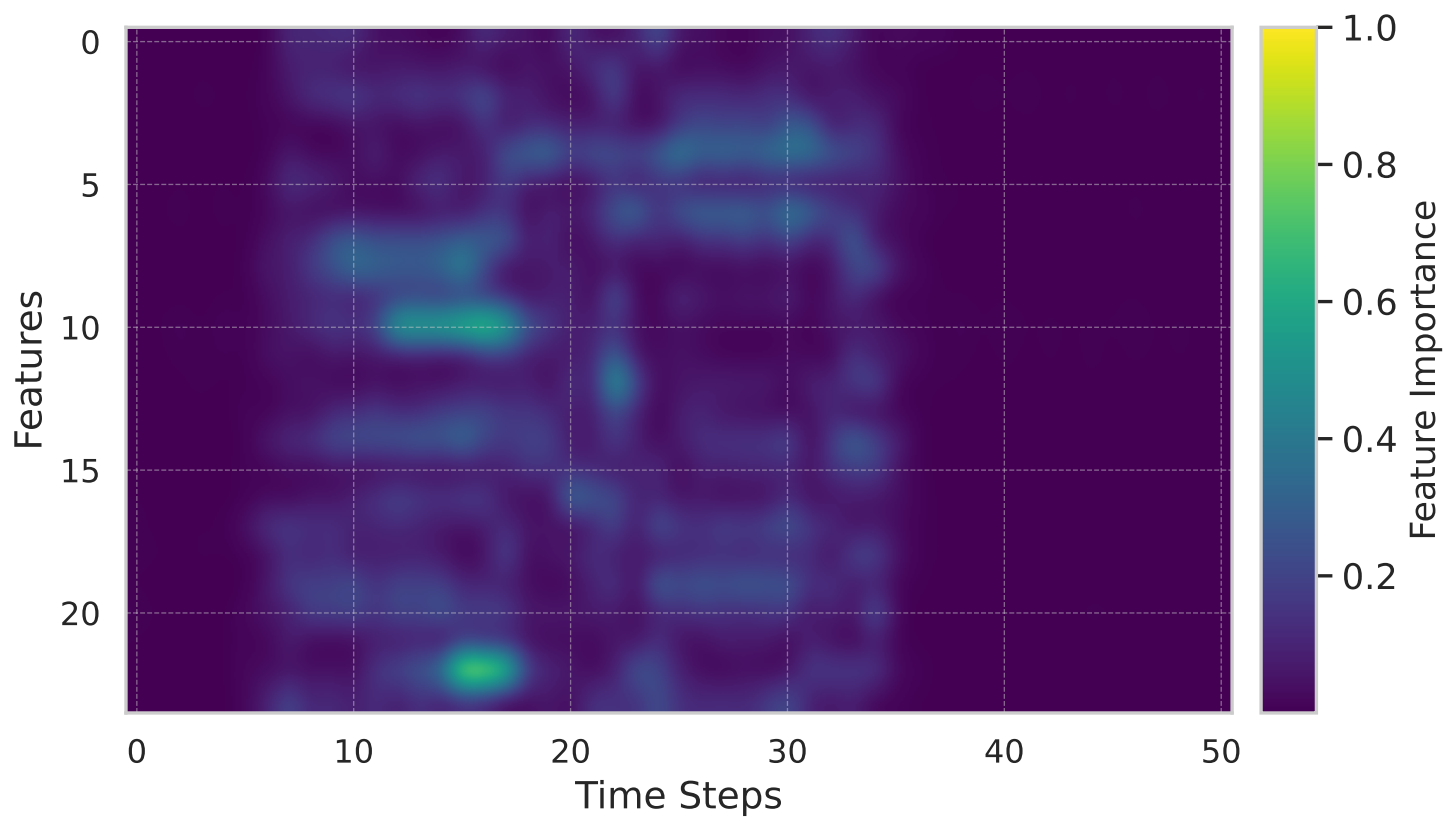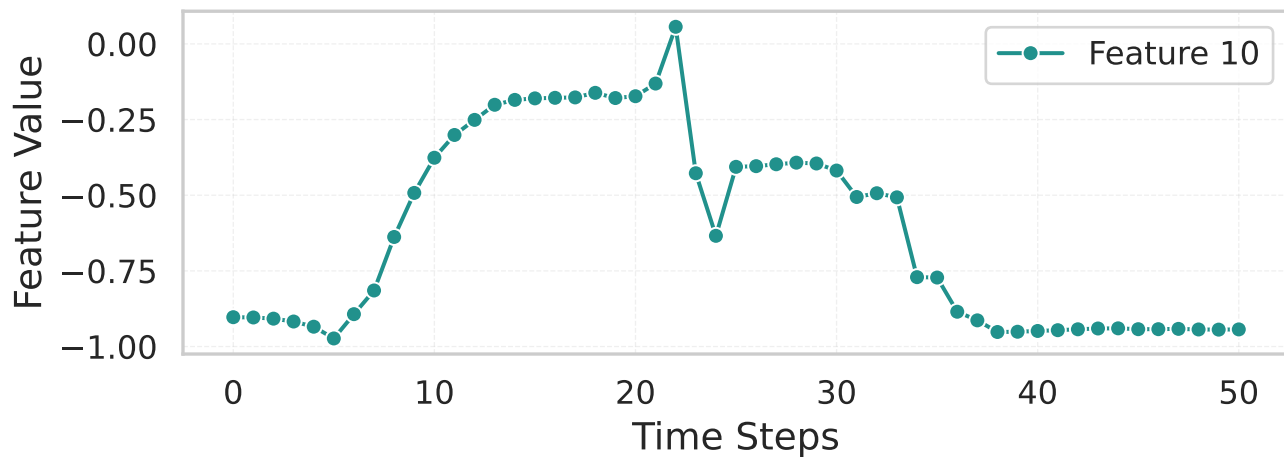

Sample Index: 170

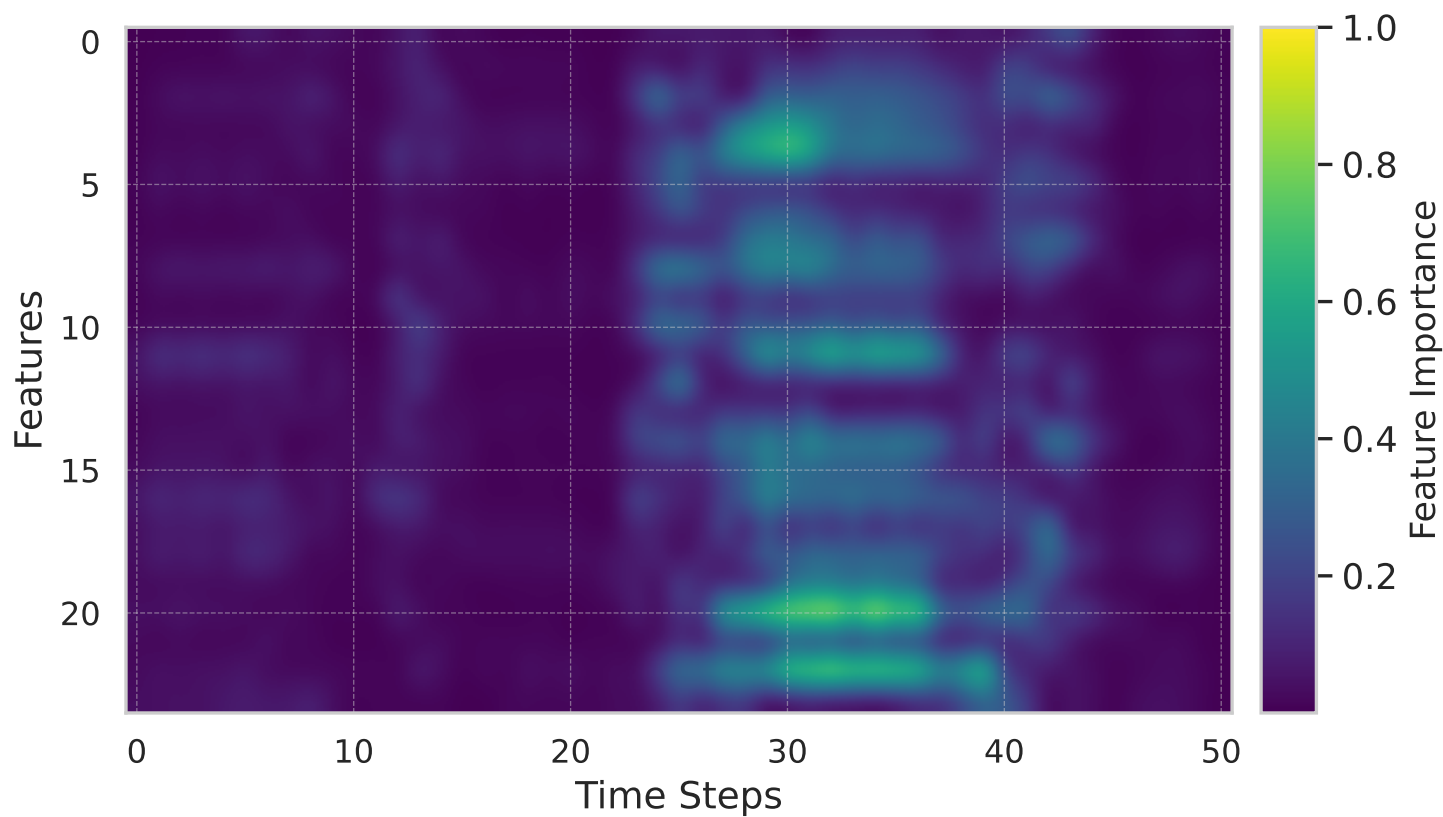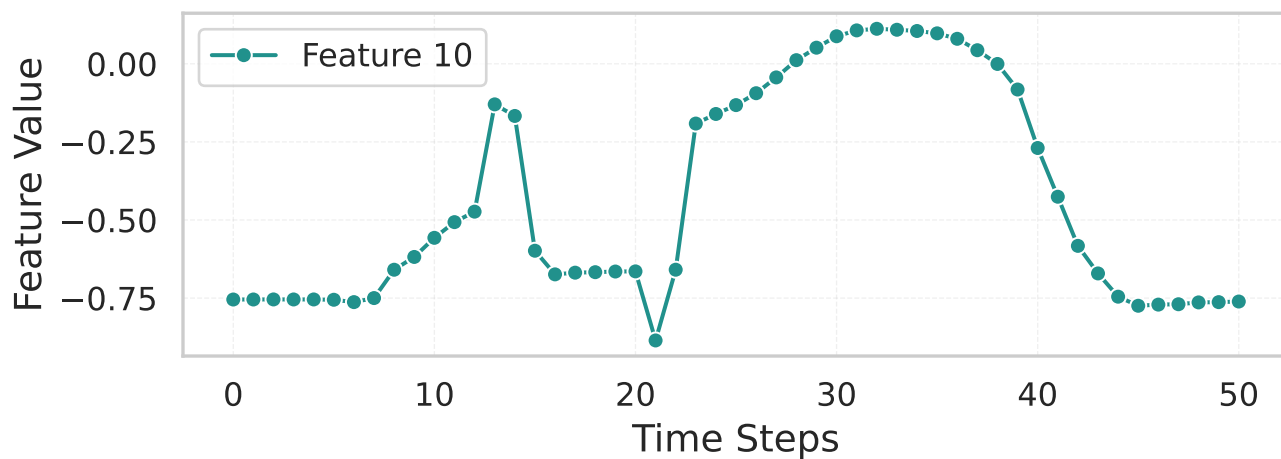

Sample Index: 171

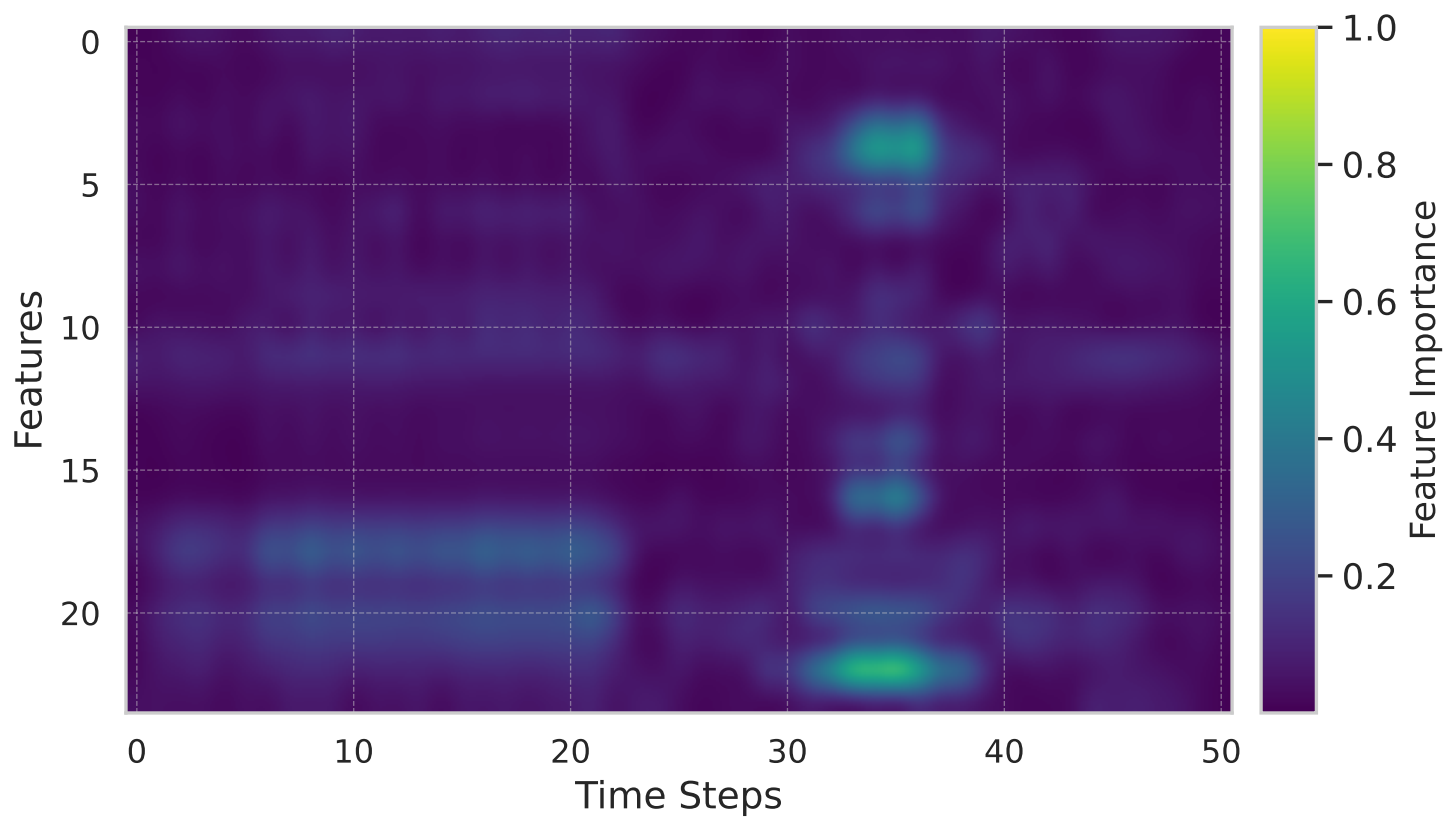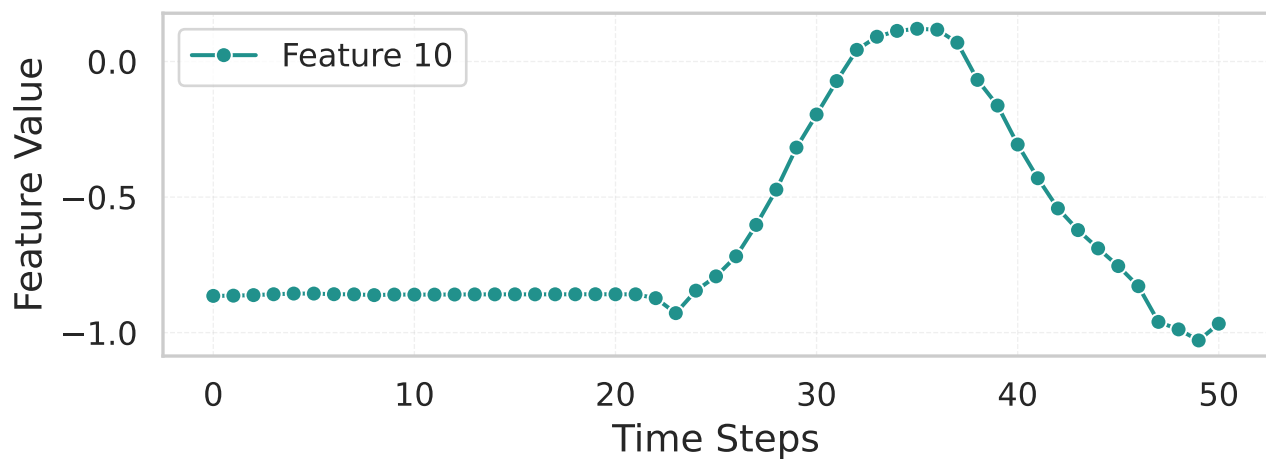



Sample Index: 172

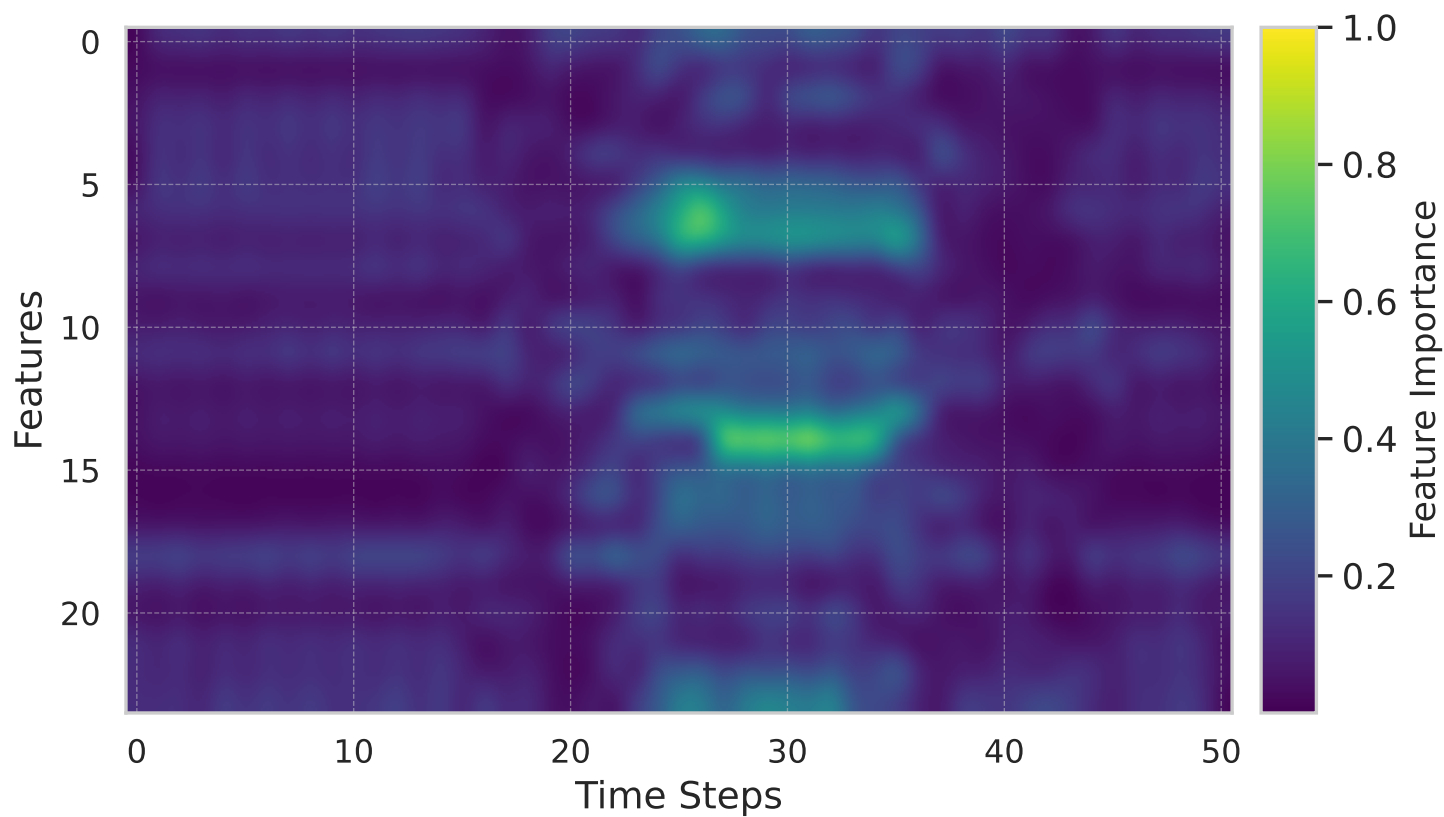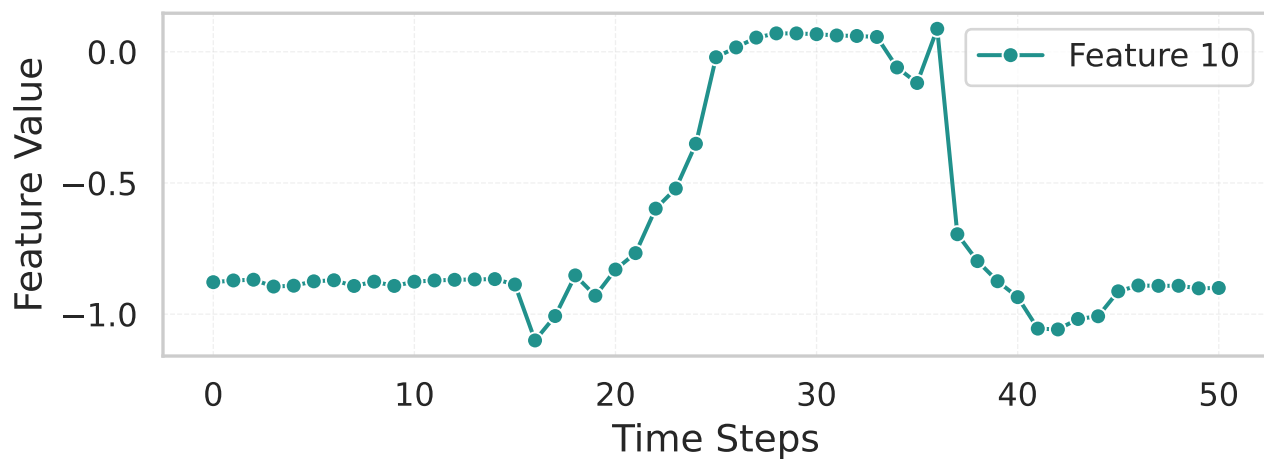

Sample Index: 173

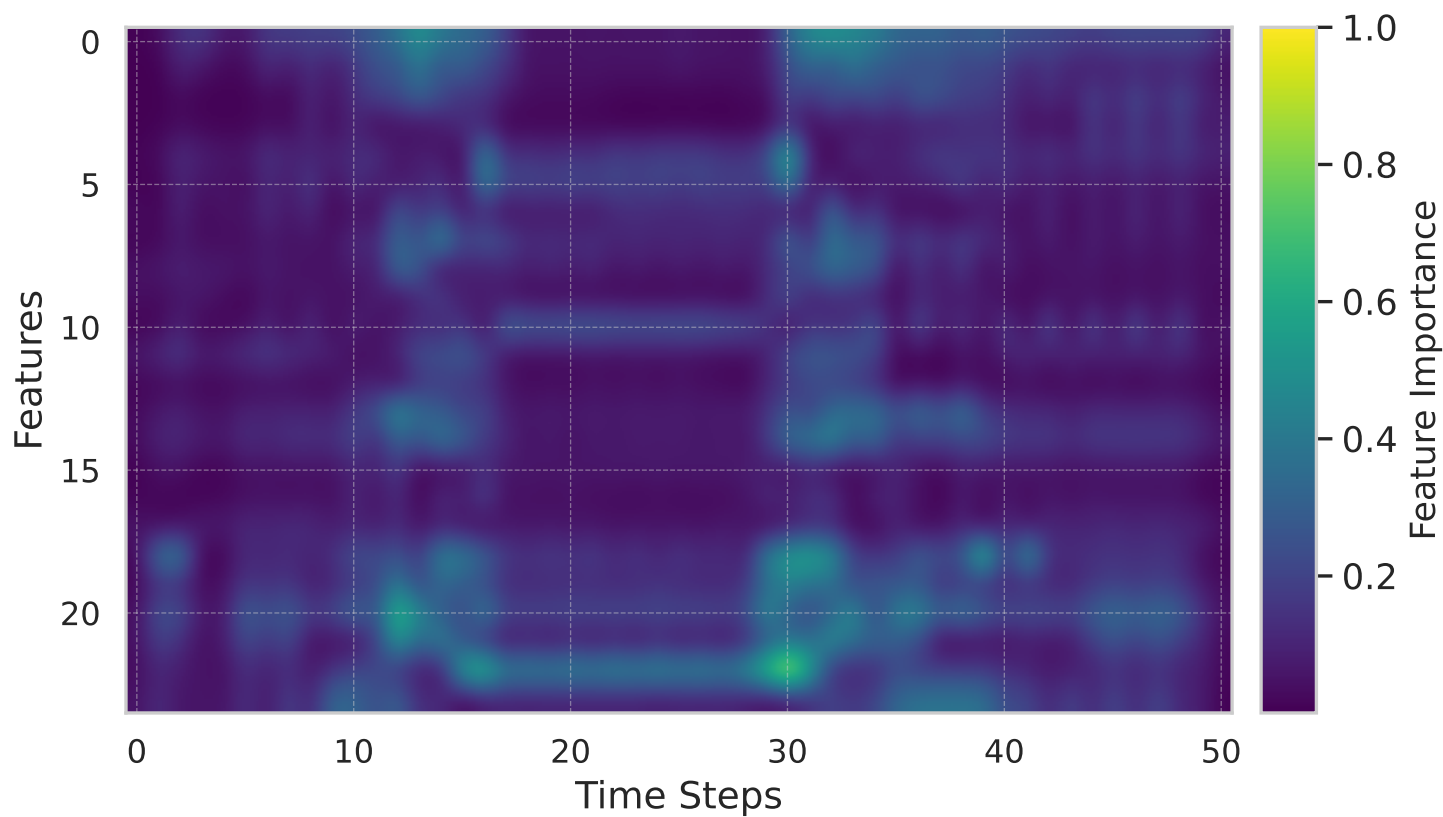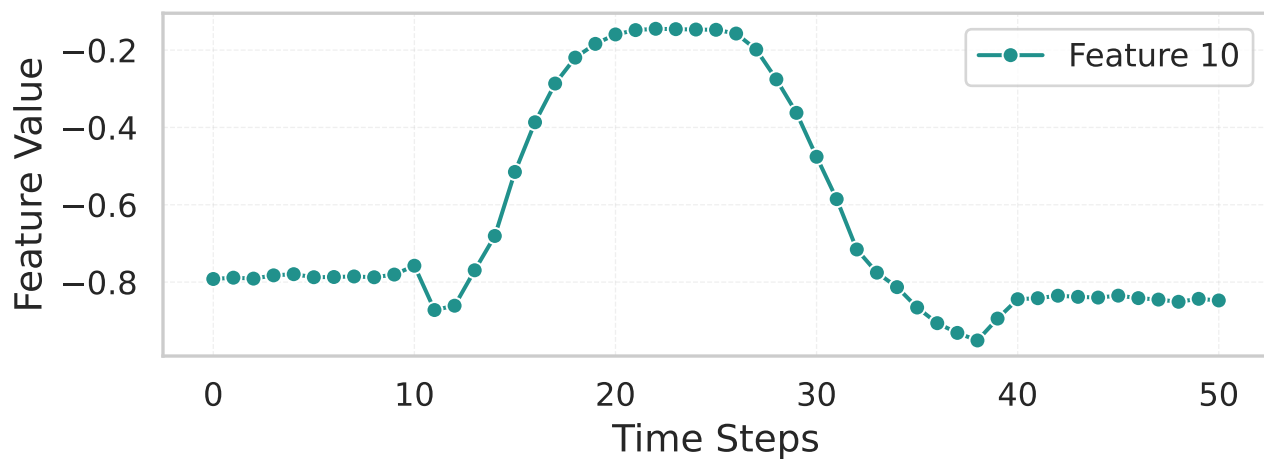

Sample Index: 174

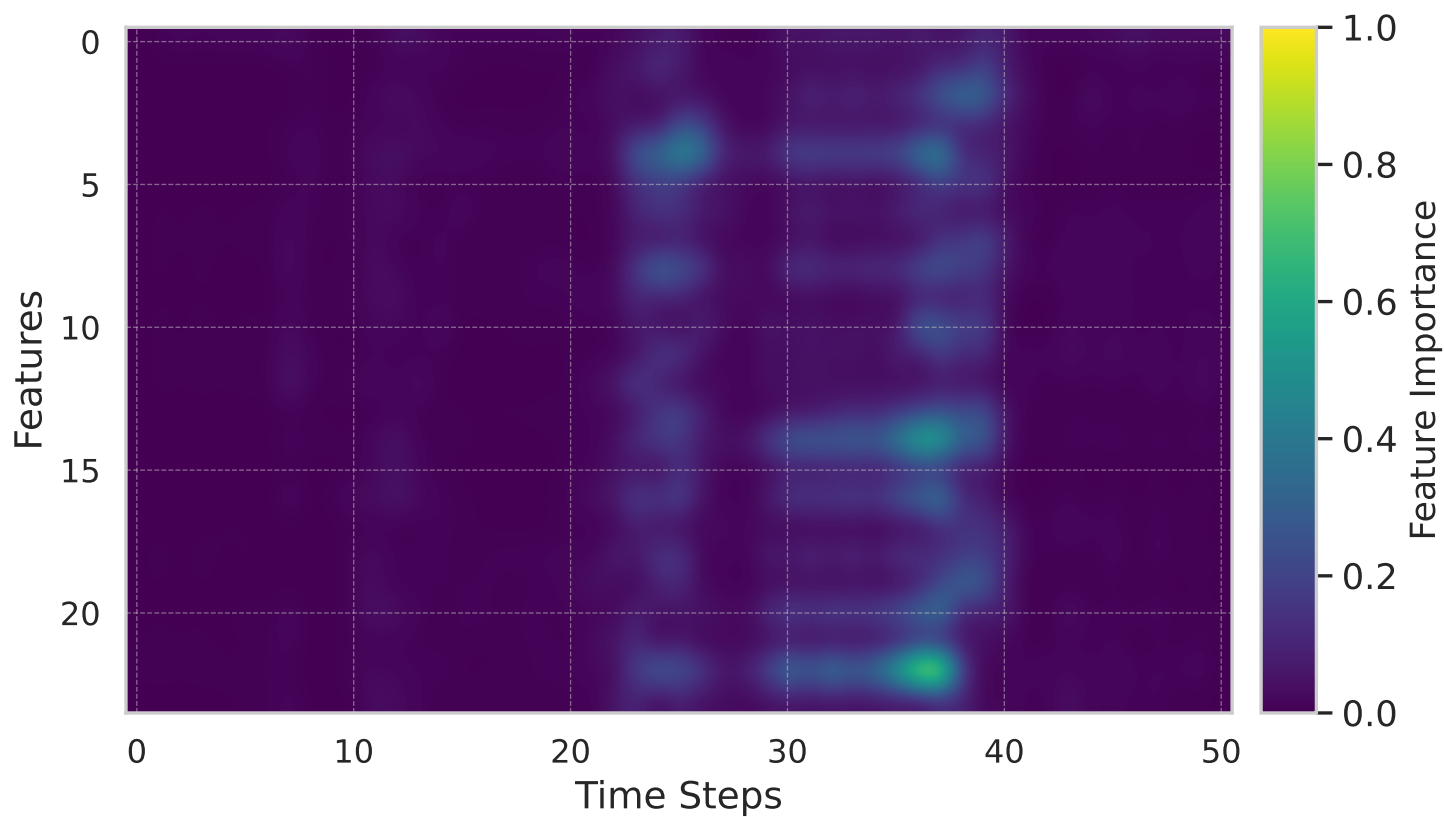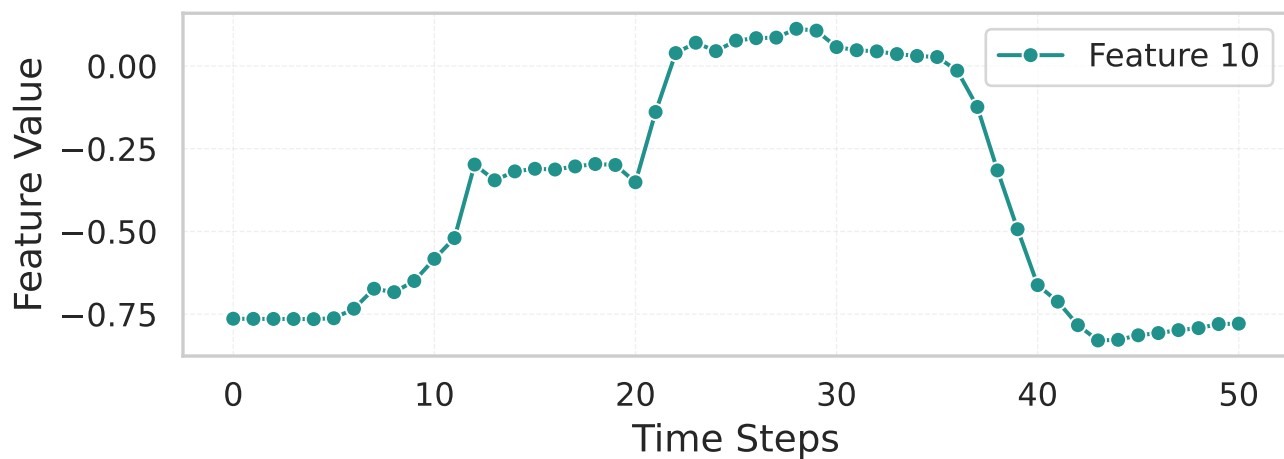

Sample Index: 175

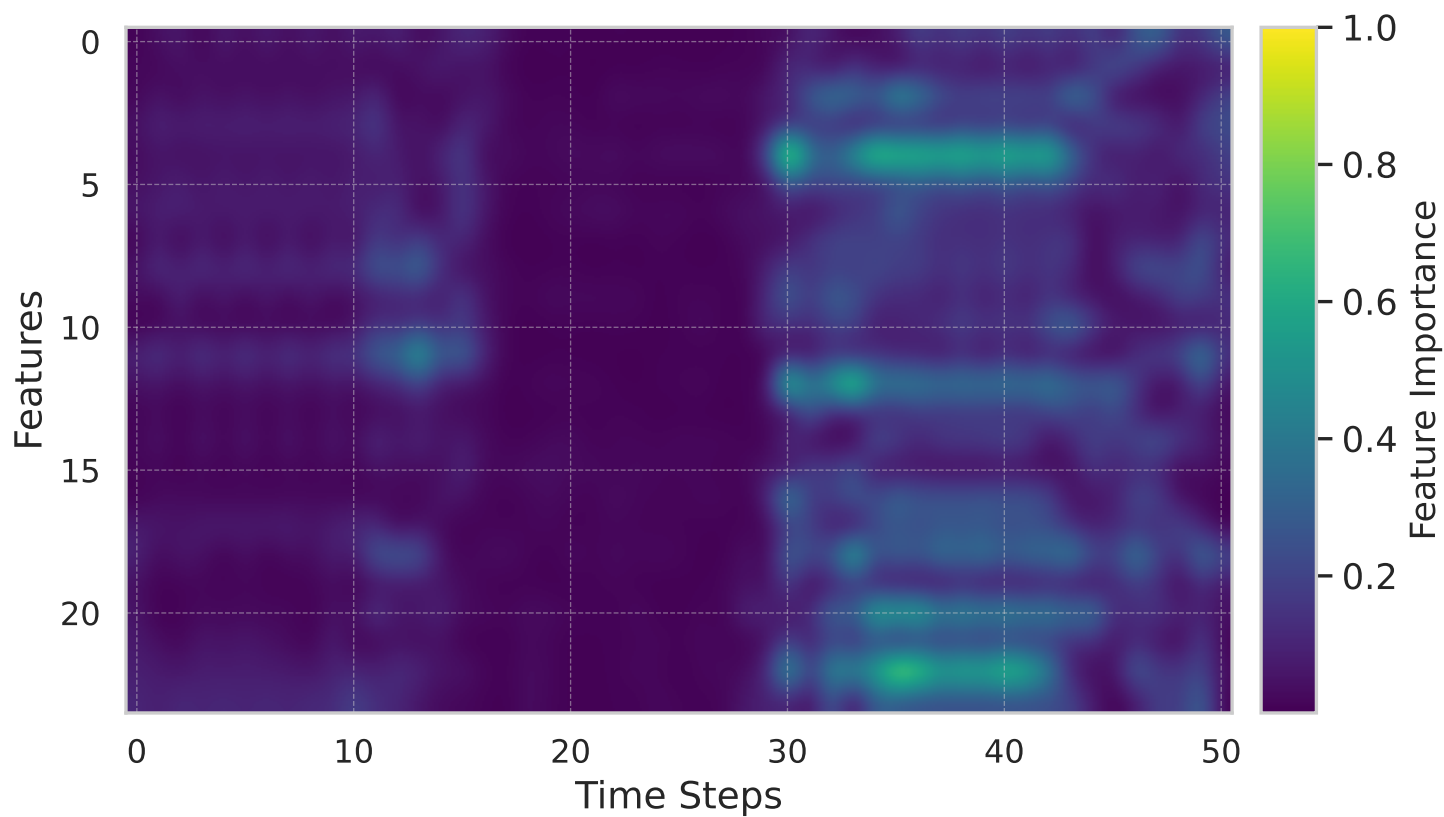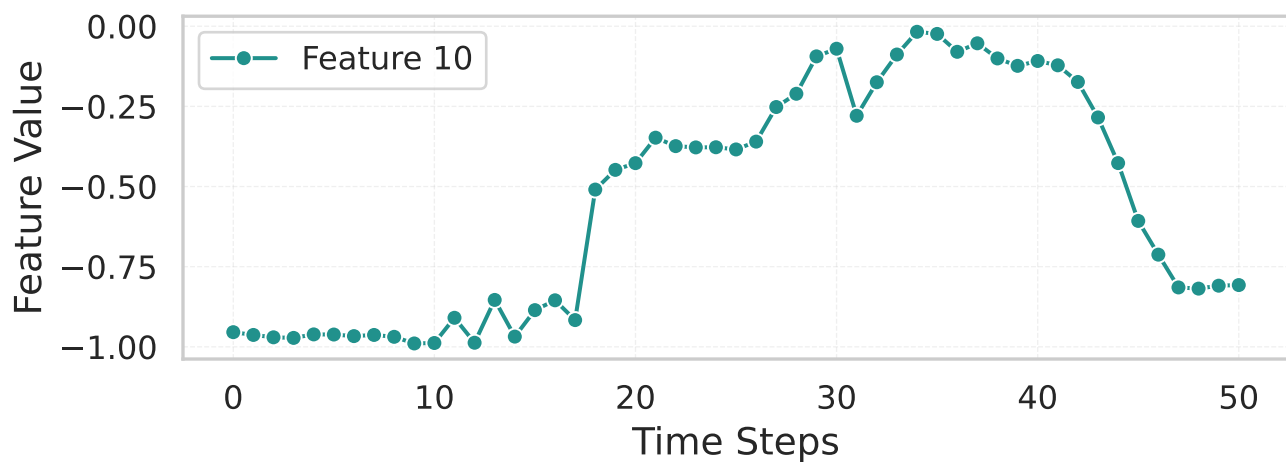

Sample Index: 176

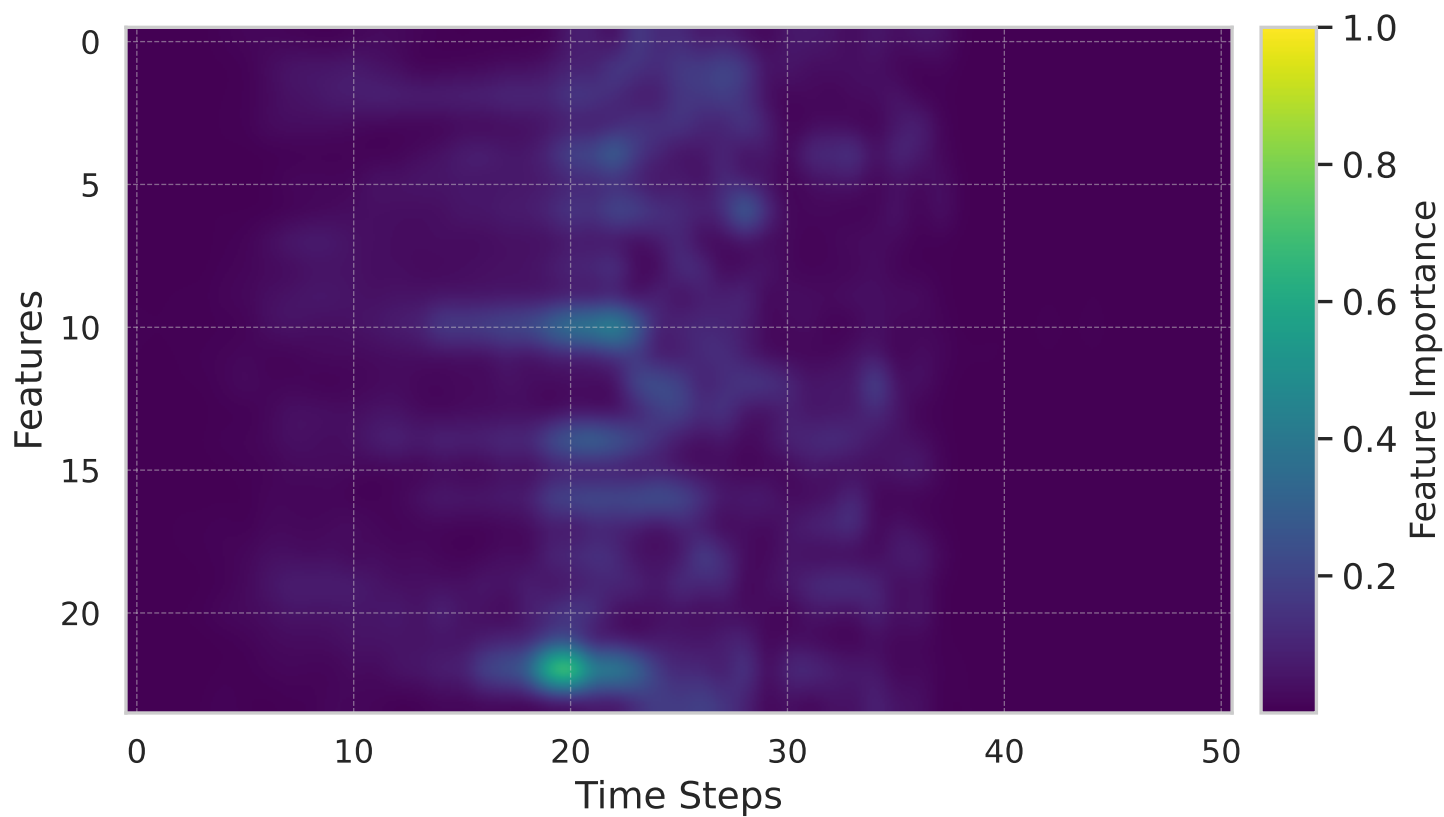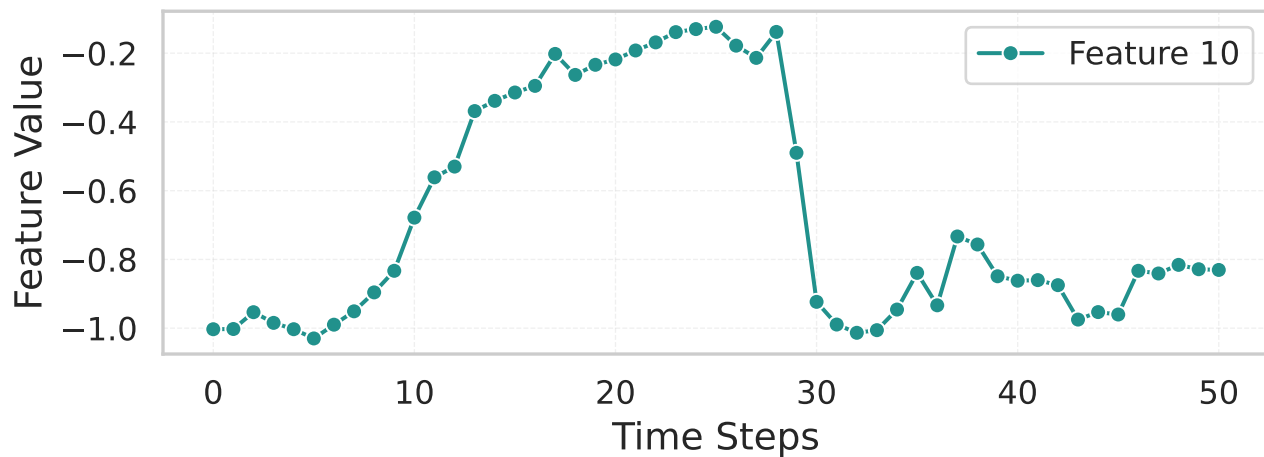

Sample Index: 177

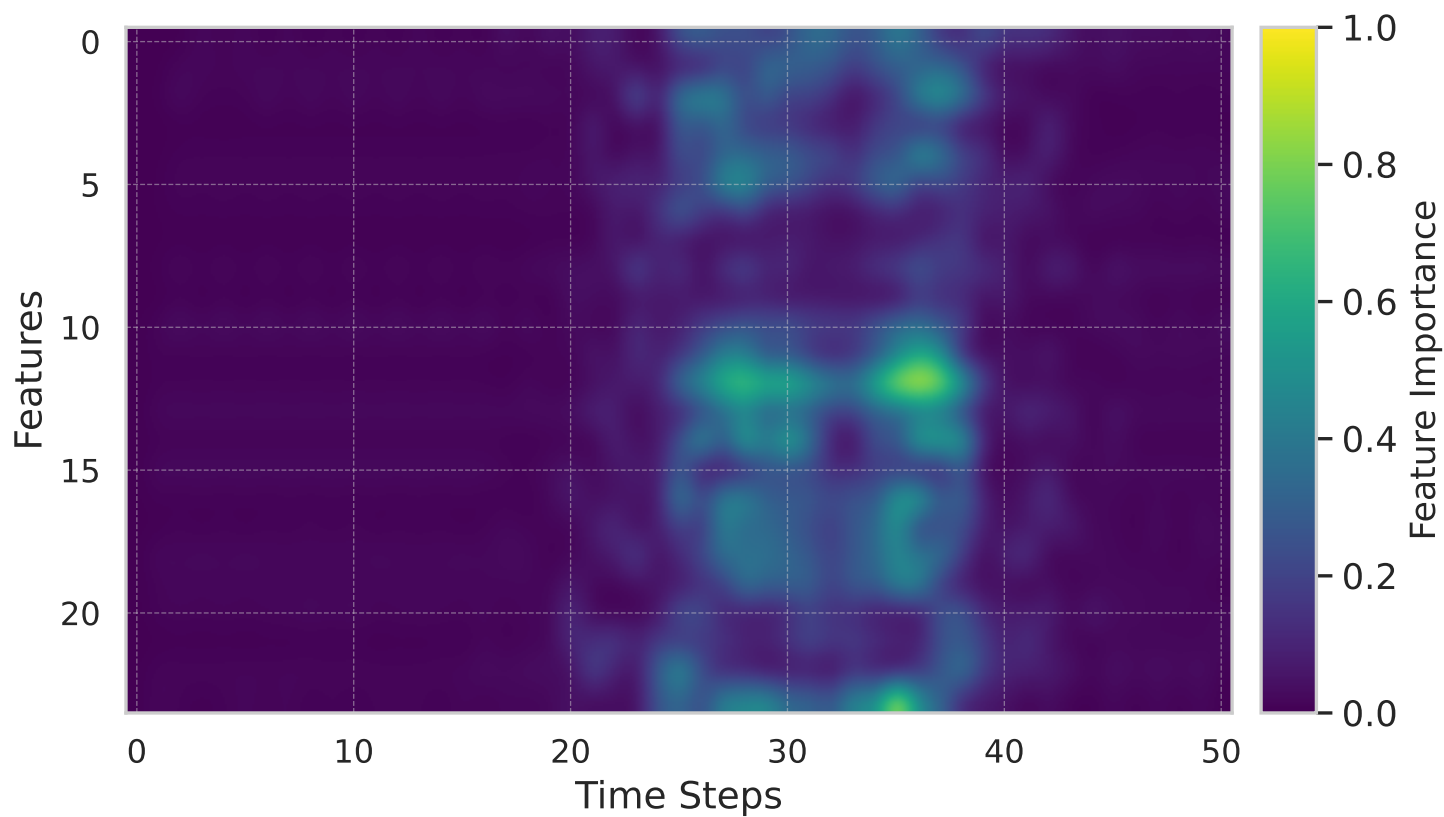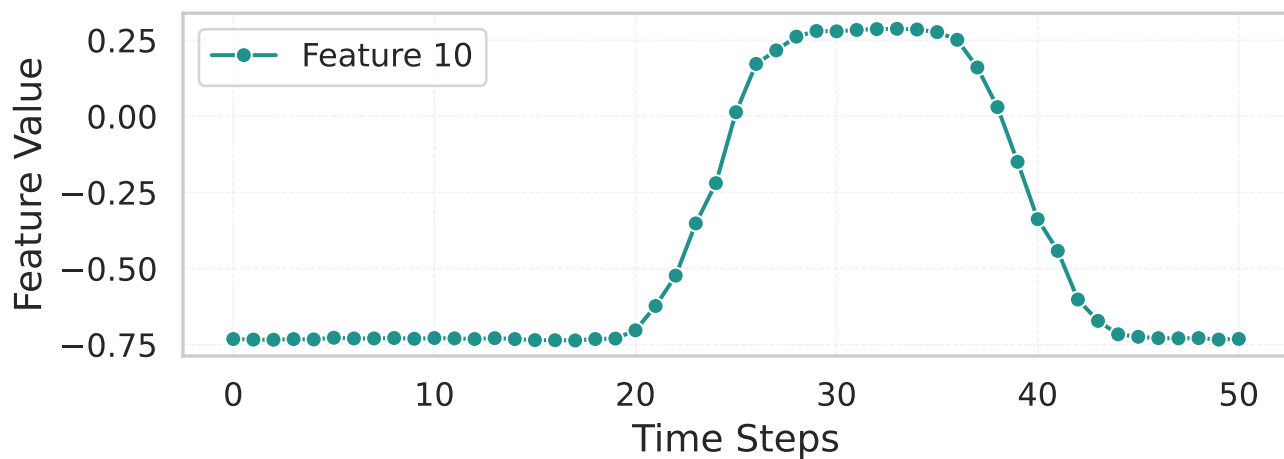

Sample Index: 178

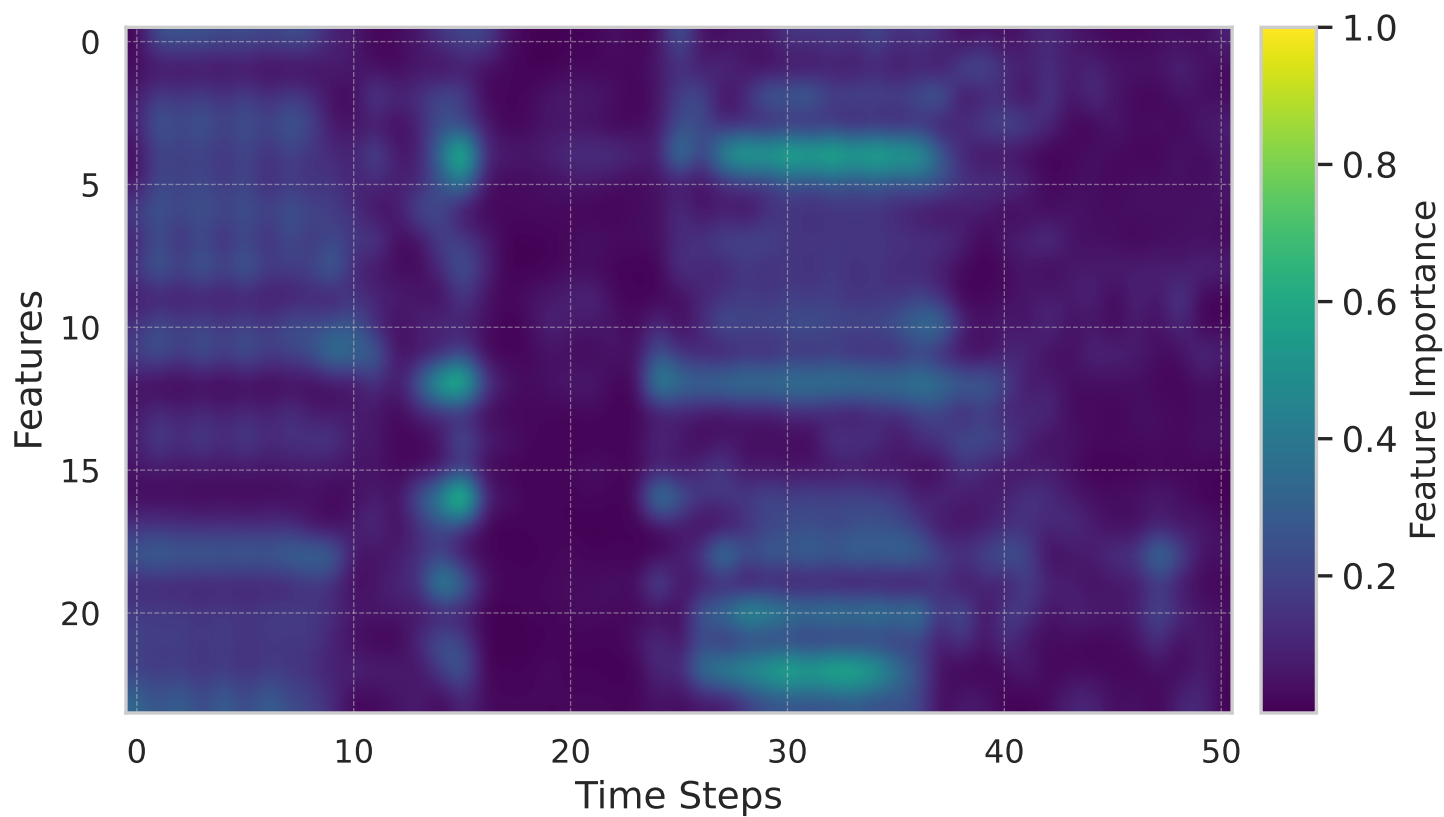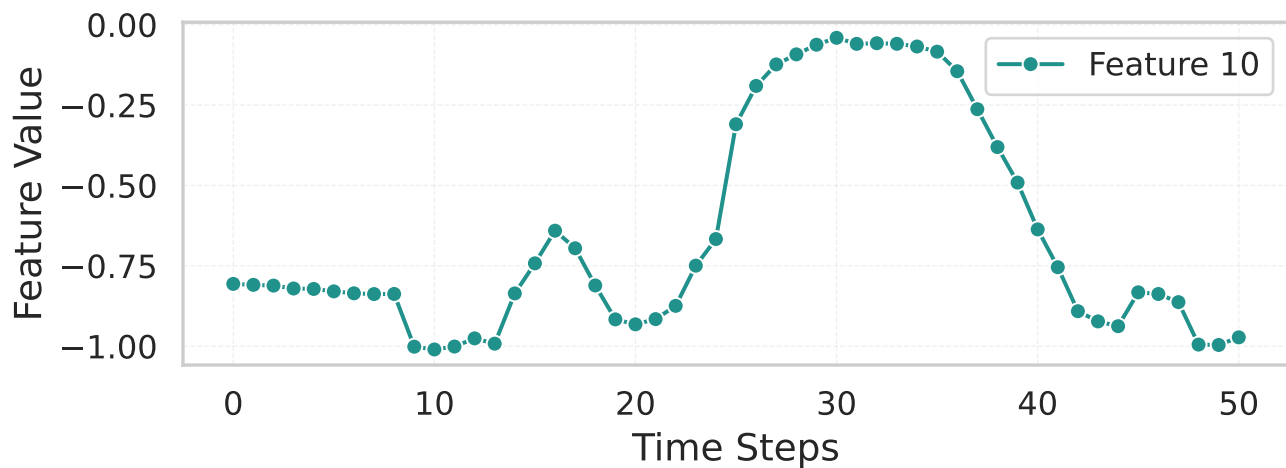

Sample Index: 179

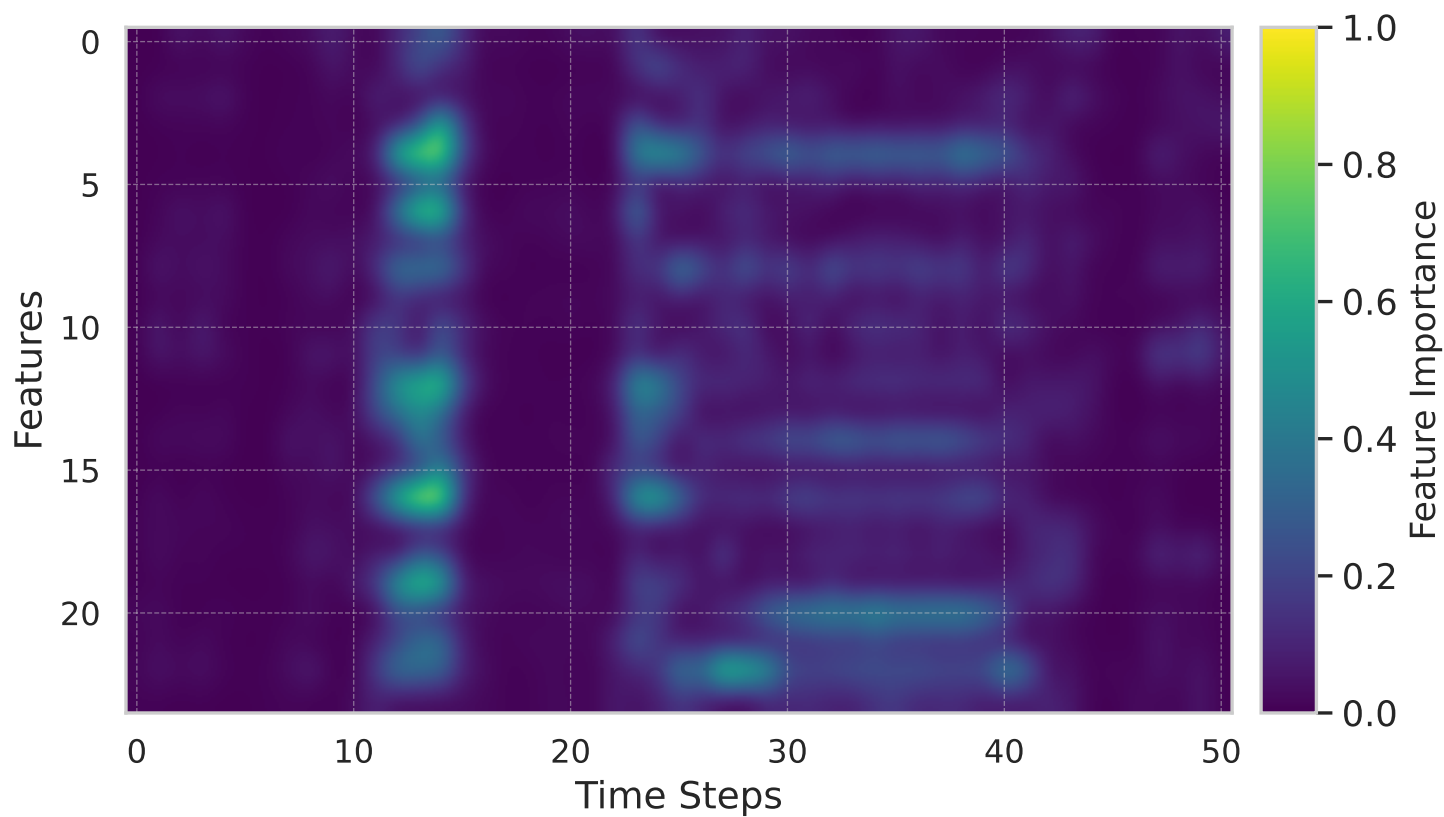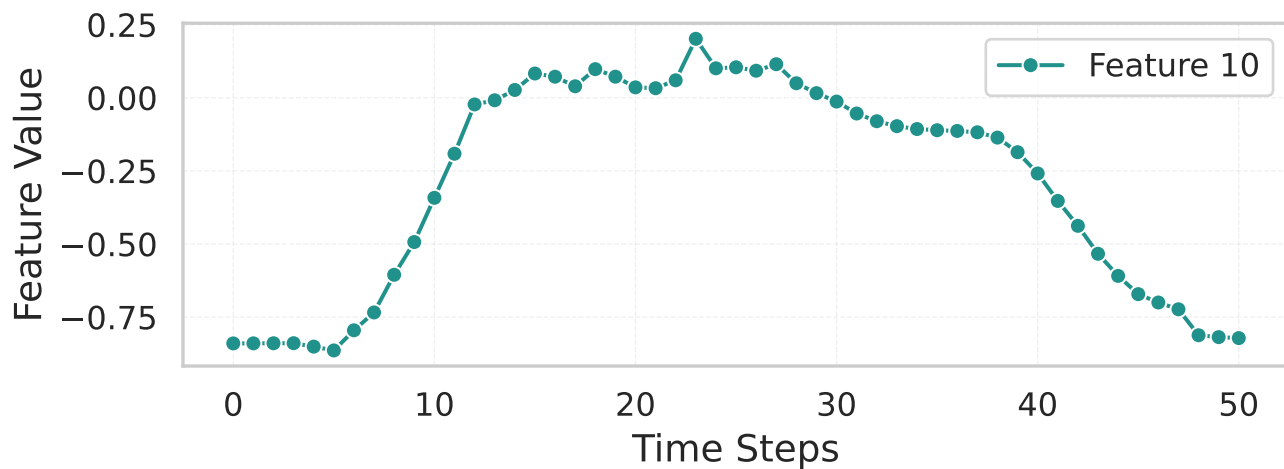

Supplement: supplementary_material [file 0_1.pdf › supplyment/other/0_1.pdf]
